# Supplementary material for: Under control: how a dietary additive can restore the gut microbiome and proteomic profile, and improve disease resilience in a marine teleostean fish fed vegetable diets
Source: Springer Nature journal article supplement (doi:10.1186/s40168-017-0390-3), 2017-12-01
Supplement: MOESM7 [file 40168_2017_390_MOESM7_ESM.pdf]

**Table S2.** List of proteins detected in anterior and posterior intestine pooled samples. Data on protein expression are mean  $\pm$  SEM of 4 pools fed the experimental diets. The number of the contig in the Sea Bream Database (<http://nutrigrp-iats.org/seabreamdb>) is indicated.

| Contig    | Protein Description                                               | Symbol   | Anterior        | Posterior       | Ratio Ant/Pos |
|-----------|-------------------------------------------------------------------|----------|-----------------|-----------------|---------------|
| C2_6629   | 1,4-alpha-glucan-branching enzyme                                 | GBE1     | 0.88 $\pm$ 0.1  | 0.91 $\pm$ 0.03 | 0.98          |
| C2_4764   | 116 kDa U5 small nuclear ribonucleoprotein component              | EFTUD2   | 0.74 $\pm$ 0.09 | 0.71 $\pm$ 0.05 | 1.03          |
| C2_299    | 14-3-3 protein beta/alpha-1                                       | YWHAB    | 1.45 $\pm$ 0.23 | 2.18 $\pm$ 0.09 | 0.67          |
| C2_268    | 14-3-3 protein epsilon                                            | YWHAE    | 1.28 $\pm$ 0.2  | 2.01 $\pm$ 0.13 | 0.63          |
| C2_2474   | 14-3-3 protein gamma-1                                            | YWHAG    | 1.8 $\pm$ 0.41  | 2.72 $\pm$ 0.09 | 0.66          |
| C2_1017   | 14-3-3 protein zeta                                               | YWHAZ    | 1.33 $\pm$ 0.14 | 4.41 $\pm$ 0.38 | 0.30          |
| C2_34474  | 14-3-3-like protein 2                                             | YWHAQ    | 1.3 $\pm$ 0.11  | 1.85 $\pm$ 0.13 | 0.70          |
| C2_4902   | 17-beta-hydroxysteroid dehydrogenase 14                           | HSD17B14 | 0.93 $\pm$ 0.05 | 2.33 $\pm$ 0.09 | 0.40          |
| C2_3100   | 1-acylglycerol-3-phosphate O-acyltransferase ABHD5                | ABHD5    | 0.85 $\pm$ 0.07 | 0.78 $\pm$ 0.13 | 1.10          |
| C2_15440  | 1-phosphatidylinositol phosphodiesterase                          | PLCD1    | 0.65 $\pm$ 0.12 | 0.4 $\pm$ 0.06  | 1.65          |
| C2_12986  | 1-phosphatidylinositol-4,5-bisphosphate phosphodiesterase delta-1 | PLCD1    | 0.76 $\pm$ 0.08 | 1.15 $\pm$ 0.16 | 0.66          |
| C2_4412   | 1-phosphatidylinositol-4,5-bisphosphate phosphodiesterase gamma-2 | PLCG2    | 1.13 $\pm$ 0.08 | 2.08 $\pm$ 0.27 | 0.54          |
| C2_3170   | 2,4-dienoyl-CoA reductase, mitochondrial                          | DECR1    | 1.16 $\pm$ 0.1  | 0.83 $\pm$ 0.03 | 1.39          |
| C2_1520   | 26S protease regulatory subunit 10B                               | PSMC6    | 1.37 $\pm$ 0.21 | 1.43 $\pm$ 0.04 | 0.96          |
| C2_4264   | 26S protease regulatory subunit 4                                 | PSMC1    | 1.2 $\pm$ 0.2   | 1.78 $\pm$ 0.08 | 0.68          |
| C2_1666   | 26S protease regulatory subunit 6A                                | PSMC3    | 1.44 $\pm$ 0.24 | 1.61 $\pm$ 0.08 | 0.90          |
| C2_482    | 26S protease regulatory subunit 6B                                | PSMC4    | 1.72 $\pm$ 0.4  | 2.15 $\pm$ 0.08 | 0.80          |
| C2_3002   | 26S protease regulatory subunit 7                                 | PSMC2    | 1.18 $\pm$ 0.07 | 1.17 $\pm$ 0.04 | 1.01          |
| C2_514    | 26S protease regulatory subunit 8                                 | PSMC5    | 0.91 $\pm$ 0.04 | 0.67 $\pm$ 0.03 | 1.37          |
| C2_2728   | 26S proteasome non-ATPase regulatory subunit 1                    | PSMD1    | 1.1 $\pm$ 0.06  | 1.33 $\pm$ 0.04 | 0.82          |
| C2_993    | 26S proteasome non-ATPase regulatory subunit 10                   | PSMD10   | 0.97 $\pm$ 0.03 | 0.95 $\pm$ 0.08 | 1.01          |
| C2_2261   | 26S proteasome non-ATPase regulatory subunit 11                   | PSMD11   | 1.8 $\pm$ 0.47  | 0.65 $\pm$ 0.04 | 2.76          |
| C2_1392   | 26S proteasome non-ATPase regulatory subunit 12                   | PSMD12   | 1.15 $\pm$ 0.09 | 1.22 $\pm$ 0.04 | 0.95          |
| C2_790    | 26S proteasome non-ATPase regulatory subunit 13                   | PSMD13   | 0.95 $\pm$ 0.07 | 1.39 $\pm$ 0.06 | 0.69          |
| C2_807    | 26S proteasome non-ATPase regulatory subunit 14                   | PSMD14   | 1.08 $\pm$ 0.11 | 1.3 $\pm$ 0.05  | 0.84          |
| C2_4556   | 26S proteasome non-ATPase regulatory subunit 2                    | PSMD2    | 1.37 $\pm$ 0.17 | 1.76 $\pm$ 0.03 | 0.78          |
| C2_1006   | 26S proteasome non-ATPase regulatory subunit 3                    | PSMD3    | 1.03 $\pm$ 0.08 | 1.51 $\pm$ 0.11 | 0.68          |
| C2_5351   | 26S proteasome non-ATPase regulatory subunit 5                    | PSMD5    | 1.1 $\pm$ 0.05  | 1.39 $\pm$ 0.18 | 0.79          |
| C2_8032   | 26S proteasome non-ATPase regulatory subunit 6                    | PSMD6    | 1 $\pm$ 0.05    | 1.5 $\pm$ 0.13  | 0.67          |
| C2_364    | 26S proteasome non-ATPase regulatory subunit 7                    | PSMD7    | 1.51 $\pm$ 0.24 | 2.1 $\pm$ 0.12  | 0.72          |
| C2_1843   | 26S proteasome non-ATPase regulatory subunit 8                    | PSMD8    | 0.98 $\pm$ 0.05 | 1.45 $\pm$ 0.16 | 0.68          |
| C2_6795   | 2-acylglycerol O-acyltransferase 2-A                              | MOGAT2   | 1.67 $\pm$ 0.29 | 1.2 $\pm$ 0.1   | 1.39          |
| C2_8379   | 2-amino-3-carboxymuconate-6-semialdehyde decarboxylase            | ACMSD    | 1.32 $\pm$ 0.14 | 1.03 $\pm$ 0.03 | 1.28          |
| C3_c25398 | 2'-deoxynucleoside 5'-phosphate N-hydrolase 1-like                | DNPH1    | 1.55 $\pm$ 0.37 | 1.66 $\pm$ 0.17 | 0.94          |
| C2_12608  | 2-hydroxyacyl-CoA lyase 1                                         | HACL1    | 1.05 $\pm$ 0.1  | 0.68 $\pm$ 0.03 | 1.53          |
| C2_8246   | 2-hydroxyacyl-CoA lyase 1                                         | HACL1    | 1.04 $\pm$ 0.07 | 0.46 $\pm$ 0.07 | 2.28          |
| C2_19129  | 2-oxoglutarate dehydrogenase, mitochondrial                       | OGDH     | 0.8 $\pm$ 0.07  | 0.69 $\pm$ 0.07 | 1.16          |
| C2_61153  | 2-oxoglutarate dehydrogenase, mitochondrial                       | OGDH     | 0.97 $\pm$ 0.08 | 0.51 $\pm$ 0.05 | 1.89          |
| C2_9582   | 2-oxoglutarate dehydrogenase, mitochondrial                       | OGDH     | 0.96 $\pm$ 0.08 | 0.49 $\pm$ 0.05 | 1.96          |
| C2_34981  | 3'(2'),5'-bisphosphate nucleotidase 1                             | BNPT1    | 1.29 $\pm$ 0.12 | 1.39 $\pm$ 0.07 | 0.93          |
| C2_7568   | 3-hydroxyacyl-CoA dehydrogenase type-2                            | HSD17B10 | 0.96 $\pm$ 0.04 | 0.95 $\pm$ 0.06 | 1.02          |
| C2_1004   | 3-hydroxyanthranilate 3,4-dioxygenase                             | HAAO     | 1.5 $\pm$ 0.22  | 1.72 $\pm$ 0.03 | 0.88          |
| C2_850    | 3-hydroxybutyrate dehydrogenase type 2                            | BDH2     | 0.78 $\pm$ 0.09 | 0.55 $\pm$ 0.03 | 1.42          |
| C2_1580   | 3-hydroxyisobutyrate dehydrogenase, mitochondrial                 | HIBADH   | 0.87 $\pm$ 0.06 | 0.47 $\pm$ 0.04 | 1.87          |
| C2_4404   | 3-hydroxyisobutyryl-CoA hydrolase, mitochondrial                  | HIBCH    | 1.12 $\pm$ 0.15 | 0.43 $\pm$ 0.04 | 2.61          |
| C2_7520   | 3-ketoacyl-CoA thiolase B, peroxisomal                            | Acaa1b   | 1.24 $\pm$ 0.12 | 1.12 $\pm$ 0.17 | 1.11          |
| C2_1174   | 3-ketoacyl-CoA thiolase, mitochondrial                            | ACAA2    | 1.24 $\pm$ 0.18 | 0.74 $\pm$ 0.05 | 1.68          |
| C2_742    | 3-oxo-5-beta-steroid 4-dehydrogenase                              | AKR1D1   | 1.15 $\pm$ 0.05 | 1.54 $\pm$ 0.08 | 0.75          |
| C2_8112   | 3-oxoacyl-[acyl-carrier-protein] reductase FabG                   | FABG     | 0.78 $\pm$ 0.09 | 0.75 $\pm$ 0.05 | 1.05          |
| C2_2505   | 3-phosphoinositide-dependent protein kinase 1                     | PDPK1    | 0.9 $\pm$ 0.05  | 1.69 $\pm$ 0.19 | 0.53          |
| C2_8805   | 40S ribosomal protein S10                                         | RPS10    | 2.41 $\pm$ 0.61 | 1.64 $\pm$ 0.11 | 1.46          |
| C2_367    | 40S ribosomal protein S11                                         | RPS11    | 2.81 $\pm$ 0.69 | 2.18 $\pm$ 0.08 | 1.29          |
| C2_583    | 40S ribosomal protein S12                                         | RPS12    | 2.34 $\pm$ 0.61 | 1.44 $\pm$ 0.16 | 1.63          |
| C2_14171  | 40S ribosomal protein S13                                         | RPS13    | 2.28 $\pm$ 0.62 | 1.86 $\pm$ 0.17 | 1.23          |
| C2_20708  | 40S ribosomal protein S14                                         | RPS14    | 2.91 $\pm$ 0.81 | 2.2 $\pm$ 0.18  | 1.32          |
| C2_26     | 40S ribosomal protein S15                                         | RPS15    | 2.93 $\pm$ 0.76 | 2.47 $\pm$ 0.22 | 1.19          |
| C2_414    | 40S ribosomal protein S15a                                        | RPS15A   | 3.39 $\pm$ 0.92 | 2.22 $\pm$ 0.16 | 1.53          |
| C2_7337   | 40S ribosomal protein S16                                         | RPS16    | 3.14 $\pm$ 0.94 | 1.78 $\pm$ 0.12 | 1.77          |
| C2_971    | 40S ribosomal protein S17                                         | RPS17    | 3.66 $\pm$ 1.14 | 2.19 $\pm$ 0.23 | 1.67          |
| C2_9151   | 40S ribosomal protein S18                                         | RPS18    | 3.55 $\pm$ 0.99 | 2.05 $\pm$ 0.11 | 1.73          |
| C2_955    | 40S ribosomal protein S19                                         | RPS19    | 4.88 $\pm$ 1.49 | 3.04 $\pm$ 0.19 | 1.60          |
| C2_684    | 40S ribosomal protein S2                                          | RPS2     | 2.24 $\pm$ 0.51 | 1.71 $\pm$ 0.15 | 1.31          |

|           |                                                             |         |           |           |      |
|-----------|-------------------------------------------------------------|---------|-----------|-----------|------|
| C2_232    | 40S ribosomal protein S20                                   | RPS20   | 1.82±0.4  | 2.58±0.33 | 0.70 |
| C2_11917  | 40S ribosomal protein S21                                   | RPS21   | 1.76±0.37 | 1.34±0.16 | 1.31 |
| C2_29474  | 40S ribosomal protein S23                                   | RPS23   | 2.66±0.81 | 1.84±0.19 | 1.44 |
| C2_1271   | 40S ribosomal protein S24                                   | RPS24   | 1.88±0.38 | 1.27±0.1  | 1.48 |
| C2_310    | 40S ribosomal protein S25                                   | RPS25   | 3.56±0.97 | 2.43±0.12 | 1.46 |
| C2_698    | 40S ribosomal protein S26                                   | RPS26   | 2.63±0.67 | 1.85±0.15 | 1.42 |
| C2_175    | 40S ribosomal protein S27                                   | Rps27   | 1.57±0.38 | 1.18±0.11 | 1.33 |
| C2_3275   | 40S ribosomal protein S28                                   | RPS28   | 1.86±0.4  | 1.29±0.07 | 1.44 |
| C2_23479  | 40S ribosomal protein S29                                   | RPS29   | 1.9±0.47  | 1.22±0.13 | 1.56 |
| C2_17873  | 40S ribosomal protein S3                                    | RPS3    | 2.21±0.47 | 1.7±0.09  | 1.30 |
| C2_2139   | 40S ribosomal protein S3a                                   | Rps3a1  | 2.66±0.73 | 1.8±0.16  | 1.48 |
| C2_593    | 40S ribosomal protein S4                                    | GM15013 | 2.54±0.7  | 1.84±0.13 | 1.38 |
| C2_433    | 40S ribosomal protein S5                                    | RPS5    | 2.5±0.55  | 2.07±0.18 | 1.21 |
| C2_164    | 40S ribosomal protein S6                                    | RPS6    | 1.23±0.18 | 1.41±0.41 | 0.87 |
| C2_133    | 40S ribosomal protein S7                                    | RPS7    | 1.65±0.33 | 1.68±0.29 | 0.98 |
| C2_4273   | 40S ribosomal protein S8                                    | RPS8    | 1.72±0.35 | 1.5±0.22  | 1.15 |
| C2_252    | 40S ribosomal protein S9                                    | RPS9    | 2.6±0.65  | 2.18±0.13 | 1.19 |
| C2_16     | 40S ribosomal protein SA                                    | RPSA    | 1.82±0.35 | 1.38±0.14 | 1.32 |
| C2_4721   | 4-aminobutyrate aminotransferase, mitochondrial             | ABAT    | 1.14±0.06 | 0.76±0.02 | 1.50 |
| C2_2062   | 4F2 cell-surface antigen heavy chain                        | SLC3A2  | 1.51±0.29 | 0.83±0.08 | 1.82 |
| C2_5124   | 5'(3')-deoxyribonucleotidase, mitochondrial                 | NT5M    | 1.61±0.26 | 1.34±0.06 | 1.21 |
| C2_53761  | 5'-3' exoribonuclease 1                                     | XRN1    | 1.14±0.08 | 0.95±0.11 | 1.19 |
| C2_16488  | 5'-3' exoribonuclease 2                                     | XRN2    | 0.97±0.01 | 0.96±0.05 | 1.01 |
| C2_66522  | 5'-3' exoribonuclease 2                                     | XRN2    | 0.83±0.06 | 0.67±0.04 | 1.24 |
| C2_10452  | 55 kDa erythrocyte membrane protein                         | MPP1    | 0.55±0.15 | 0.55±0.15 | 1.01 |
| C2_4899   | 5'-AMP-activated protein kinase catalytic subunit alpha-1   | PRKAA1  | 0.7±0.12  | 0.46±0.06 | 1.52 |
| C2_9207   | 5-beta-cholestane-3-alpha,7-alpha-diol 12-alpha-hydroxylase | CYP8B1  | 1.3±0.18  | 0.91±0.23 | 1.42 |
| C2_58937  | 5-oxoprolinase                                              | OPLAH   | 0.99±0.05 | 0.68±0.05 | 1.46 |
| C2_5222   | 60 kDa heat shock protein, mitochondrial                    | HSPD1   | 1.11±0.12 | 0.85±0.1  | 1.30 |
| C2_47     | 60S acidic ribosomal protein P0                             | RPLP0   | 1.85±0.38 | 1.91±0.09 | 0.97 |
| C2_46323  | 60S acidic ribosomal protein P1                             | Rplp1   | 1.36±0.15 | 1.07±0.04 | 1.27 |
| C2_6923   | 60S acidic ribosomal protein P2                             | RPLP2   | 1.29±0.11 | 1.07±0.05 | 1.20 |
| C2_167    | 60S ribosomal protein L10                                   | RPL10   | 3.72±1.01 | 2.27±0.09 | 1.64 |
| C2_67     | 60S ribosomal protein L10a                                  | RPL10A  | 2.41±0.57 | 1.42±0.08 | 1.70 |
| C2_236    | 60S ribosomal protein L11                                   | RPL11   | 2.87±0.88 | 1.14±0.06 | 2.52 |
| C2_587    | 60S ribosomal protein L12                                   | RPL12   | 1.6±0.27  | 2.05±0.13 | 0.78 |
| C2_453    | 60S ribosomal protein L13                                   | RPL13   | 2.9±0.68  | 1.94±0.12 | 1.50 |
| C2_441    | 60S ribosomal protein L13a                                  | RPL13A  | 2.32±0.55 | 1.04±0.07 | 2.23 |
| C2_142    | 60S ribosomal protein L14                                   | RPL14   | 3.12±0.93 | 1.34±0.07 | 2.32 |
| C2_279    | 60S ribosomal protein L15                                   | RPL15   | 2.48±0.63 | 1.21±0.1  | 2.06 |
| C2_1244   | 60S ribosomal protein L17                                   | RPL17   | 2.97±0.88 | 1.3±0.04  | 2.29 |
| C2_842    | 60S ribosomal protein L18                                   | RPL18   | 1.8±0.36  | 0.88±0.03 | 2.05 |
| C2_12358  | 60S ribosomal protein L18a                                  | RPL18A  | 2.02±0.52 | 1.02±0.07 | 1.98 |
| C2_700    | 60S ribosomal protein L19                                   | RPL19   | 4±1.32    | 1.71±0.07 | 2.34 |
| C2_94336  | 60S ribosomal protein L21                                   | RPL21   | 2.81±0.7  | 1.5±0.06  | 1.87 |
| C2_39656  | 60S ribosomal protein L22                                   | RPL22   | 1.63±0.3  | 1.78±0.13 | 0.91 |
| C2_373    | 60S ribosomal protein L23                                   | RPL23   | 2.71±0.74 | 1.18±0.06 | 2.29 |
| C2_1007   | 60S ribosomal protein L23a                                  | Rpl23a  | 2.73±0.7  | 1.38±0.04 | 1.97 |
| C2_119969 | 60S ribosomal protein L24                                   | RPL24   | 5.15±1.75 | 1.54±0.21 | 3.35 |
| C2_392    | 60S ribosomal protein L26                                   | RPL26   | 2.56±0.69 | 1.45±0.11 | 1.77 |
| C2_121623 | 60S ribosomal protein L27                                   | RPL27   | 4.5±1.27  | 2.95±0.12 | 1.53 |
| C2_343    | 60S ribosomal protein L27a                                  | RPL27A  | 2.72±0.64 | 1.77±0.06 | 1.54 |
| C2_1383   | 60S ribosomal protein L28                                   | RPL28   | 4.41±1.21 | 4.75±0.29 | 0.93 |
| C2_12     | 60S ribosomal protein L3                                    | RPL3    | 2.34±0.67 | 0.94±0.06 | 2.49 |
| C2_17126  | 60S ribosomal protein L30                                   | RPL30   | 3.52±1    | 2.27±0.11 | 1.55 |
| C2_111961 | 60S ribosomal protein L31                                   | RPL31   | 2.1±0.44  | 0.95±0.08 | 2.22 |
| C2_361    | 60S ribosomal protein L32                                   | Rpl32   | 2.47±0.6  | 1.36±0.09 | 1.81 |
| C2_72598  | 60S ribosomal protein L34                                   | Rpl34   | 8.36±2.83 | 5.21±0.53 | 1.60 |
| C2_89835  | 60S ribosomal protein L35                                   | RPL35   | 2.57±0.58 | 2.63±0.12 | 0.98 |
| C2_3033   | 60S ribosomal protein L35a                                  | RPL35A  | 2.66±0.7  | 1.24±0.04 | 2.14 |
| C2_2019   | 60S ribosomal protein L36                                   | Rpl36   | 2.1±0.39  | 1.69±0.12 | 1.24 |
| C2_1788   | 60S ribosomal protein L36a                                  | Rpl36a  | 2.66±0.64 | 1.1±0.11  | 2.42 |
| C2_9484   | 60S ribosomal protein L38                                   | RPL38   | 3.2±0.92  | 1.53±0.1  | 2.10 |
| C2_25     | 60S ribosomal protein L4                                    | RPL4    | 2.59±0.72 | 1.25±0.07 | 2.07 |
| C2_143    | 60S ribosomal protein L5                                    | RPL5    | 2.25±0.48 | 1.91±0.13 | 1.18 |
| C2_827    | 60S ribosomal protein L6                                    | RPL6    | 2.87±0.83 | 1.31±0.07 | 2.19 |
| C2_434    | 60S ribosomal protein L7                                    | RPL7    | 2.98±0.85 | 1.37±0.12 | 2.18 |

|             |                                                               |          |           |           |      |
|-------------|---------------------------------------------------------------|----------|-----------|-----------|------|
| C2_98       | 60S ribosomal protein L7a                                     | RPL7A    | 2.38±0.53 | 1.39±0.11 | 1.71 |
| C2_174      | 60S ribosomal protein L8                                      | RPL8     | 2.66±0.72 | 1.1±0.09  | 2.42 |
| C2_156      | 60S ribosomal protein L9                                      | RPL9     | 2.96±0.91 | 1.14±0.04 | 2.59 |
| C2_14127    | 6-phosphofructo-2-kinase/fructose-2,6-biphosphatase 1         | PFKFB1   | 1.52±0.18 | 1.64±0.09 | 0.93 |
| C2_11947    | 6-phosphofructo-2-kinase/fructose-2,6-biphosphatase 4         | PFKFB4   | 1.43±0.18 | 2.36±0.12 | 0.61 |
| C2_3317     | 6-phosphofructokinase type C                                  | PFKP     | 1.18±0.07 | 1.6±0.17  | 0.74 |
| C2_4969     | 6-phosphofructokinase, liver type                             | PFKP     | 1.19±0.11 | 1.22±0.16 | 0.97 |
| C2_531      | 6-phosphogluconate dehydrogenase, decarboxylating             | PGD      | 1.35±0.17 | 1.62±0.02 | 0.84 |
| C2_6550     | 6-phosphogluconolactonase                                     | PGLS     | 0.91±0.08 | 0.78±0.07 | 1.16 |
| C2_14692    | 6-pyruvoyl tetrahydrobiopterin synthase                       | PTS      | 0.78±0.11 | 0.77±0.09 | 1.01 |
| C2_25027    | 78 kDa glucose-regulated protein                              | HSPA5    | 1.9±0.39  | 1.14±0.02 | 1.67 |
| C2_14888    | 78 kDa glucose-regulated protein                              | HSPA5    | 1.41±0.16 | 0.64±0.05 | 2.23 |
| C2_17792    | 7-dehydrocholesterol reductase                                | DHCR7    | 1.34±0.13 | 0.77±0.09 | 1.74 |
| C2_4132     | 90kDa heat shock protein alpha 1                              | HSP90AA1 | 0.65±0.15 | 1.17±0.09 | 0.55 |
| C2_42       | 90kDa heat shock protein beta                                 | HSP90AB1 | 1.52±0.23 | 3.07±0.48 | 0.49 |
| C2_1584     | Abhydrolase domain-containing protein 13                      | ABHD13   | 1.21±0.14 | 0.93±0.18 | 1.29 |
| C2_40874    | Abhydrolase domain-containing protein 14B                     | ABHD14B  | 1.4±0.19  | 2.05±0.2  | 0.68 |
| C2_7286     | Abhydrolase domain-containing protein 14B                     | ABHD14B  | 1.06±0.07 | 1.07±0.04 | 0.99 |
| C2_98839    | Acetolactate synthase-like protein                            | ILVBL    | 1.66±0.25 | 1.09±0.06 | 1.52 |
| C2_13751    | Acetolactate synthase-like protein                            | ILVBL    | 1.51±0.2  | 0.69±0.04 | 2.20 |
| C2_53898    | Acetyl-CoA acetyltransferase, cytosolic                       | ACAT2    | 1.73±0.3  | 0.6±0.03  | 2.89 |
| C2_181      | Acetyl-CoA acetyltransferase, mitochondrial                   | ACAT1    | 1.03±0.13 | 1.02±0.13 | 1.01 |
| C2_5360     | Acetyl-coenzyme A synthetase 2-like, mitochondrial            | ACSS1    | 0.92±0.04 | 1.99±0.09 | 0.46 |
| C2_14060    | Acetyl-coenzyme A synthetase, cytoplasmic                     | ACSS2    | 0.97±0.12 | 2.01±0.35 | 0.48 |
| C2_10641    | Acetyl-coenzyme A synthetase, cytoplasmic                     | ACSS2    | 0.9±0.05  | 1.67±0.23 | 0.54 |
| C2_2879     | Acid ceramidase                                               | ASAH1    | 0.91±0.12 | 0.61±0.05 | 1.49 |
| C2_3009     | Acid sphingomyelinase-like phosphodiesterase 3b               | SMPDL3B  | 0.69±0.11 | 0.29±0.03 | 2.42 |
| C2_8126     | Acid trehalase-like protein 1                                 | ATHL1    | 0.62±0.14 | 0.76±0.05 | 0.82 |
| C2_86088    | Acidic leucine-rich nuclear phosphoprotein 32 family member B | Anp32b   | 1.22±0.22 | 1.26±0.11 | 0.97 |
| C2_18917    | Acidic leucine-rich nuclear phosphoprotein 32 family member E | Anp32e   | 1.09±0.04 | 1.19±0.1  | 0.92 |
| C3_lrc63576 | Acidic mammalian chitinase                                    | CHIA     | 0.49±0.18 | 0.25±0.04 | 1.95 |
| C2_18809    | Aconitate hydratase, mitochondrial                            | ACO2     | 2.6±0.72  | 1.61±0.18 | 1.61 |
| C2_33453    | Aconitate hydratase, mitochondrial                            | ACO2     | 2.27±0.52 | 1.33±0.15 | 1.70 |
| C2_15154    | Aconitate hydratase, mitochondrial                            | ACO2     | 0.35±0.22 | 0.13±0.02 | 2.72 |
| C2_210      | Actin, cytoplasmic 1                                          | ACTB     | 1.71±0.29 | 3.76±0.52 | 0.46 |
| C2_102126   | Actin, cytoplasmic 2                                          | ACTG1    | 1.68±0.3  | 2.87±0.36 | 0.58 |
| C2_89711    | Actin-binding LIM protein 2                                   | ABLIM2   | 0.95±0.08 | 6.2±1.77  | 0.15 |
| C2_376      | Actin-like protein 6A                                         | ACTL6A   | 0.7±0.12  | 0.58±0.07 | 1.21 |
| C2_8398     | Actin-related protein 10                                      | ACTR10   | 1.67±0.26 | 2.57±0.11 | 0.65 |
| C2_1852     | Actin-related protein 2                                       | ACTR2    | 0.56±0.15 | 0.5±0.03  | 1.11 |
| C3_c11102   | Actin-related protein 2/3 complex subunit 1A                  | ARPC1A   | 1.04±0.04 | 1.63±0.26 | 0.64 |
| C2_4212     | Actin-related protein 2/3 complex subunit 1B                  | ARPC1B   | 1.73±0.3  | 2.1±0.15  | 0.82 |
| C2_22529    | Actin-related protein 2/3 complex subunit 2                   | ARPC2    | 1.59±0.24 | 2.11±0.12 | 0.76 |
| C2_4166     | Actin-related protein 2/3 complex subunit 3                   | ARPC3    | 1.43±0.26 | 2.3±0.26  | 0.62 |
| C2_427      | Actin-related protein 2/3 complex subunit 4                   | ARPC4    | 1.46±0.21 | 1.98±0.19 | 0.73 |
| C2_503      | Actin-related protein 2/3 complex subunit 5                   | ARPC5    | 2.3±0.65  | 3.81±0.31 | 0.61 |
| C2_3453     | Actin-related protein 2-A                                     | ACTR2    | 1.05±0.22 | 0.44±0.03 | 2.36 |
| C2_42139    | Actin-related protein 2-B                                     | ACTR2    | 0.69±0.11 | 0.71±0.04 | 0.97 |
| C2_1771     | Actin-related protein 3                                       | ACTR3    | 1.47±0.29 | 2.47±0.2  | 0.59 |
| C2_2259     | Activated RNA polymerase II transcriptional coactivator p15   | SUB1     | 0.75±0.12 | 0.45±0.06 | 1.69 |
| C2_102      | Activating signal cointegrator 1 complex subunit 1            | ASCC1    | 0.67±0.12 | 0.43±0.05 | 1.57 |
| C2_2407     | Activator of 90 kDa heat shock protein ATPase homolog 1       | AHSA1    | 1.12±0.07 | 1.36±0.02 | 0.82 |
| C2_20973    | Active breakpoint cluster region-related protein              | ABR      | 1.08±0.03 | 1.11±0.07 | 0.97 |
| C2_11239    | Acyl carrier protein, mitochondrial                           | NDUFAB1  | 1.24±0.09 | 0.87±0.05 | 1.44 |
| C2_2532     | Acylamino-acid-releasing enzyme                               | APEH     | 0.79±0.1  | 0.62±0.04 | 1.27 |
| C2_47266    | Acyl-CoA dehydrogenase family member 11                       | ACAD11   | 0.97±0.19 | 0.78±0.08 | 1.25 |
| C2_3692     | Acyl-CoA dehydrogenase family member 9, mitochondrial         | ACAD9    | 0.85±0.12 | 0.4±0.03  | 2.14 |
| C2_8427     | Acyl-CoA synthetase family member 2, mitochondrial            | ACSF2    | 0.98±0.04 | 0.51±0.03 | 1.92 |
| C2_649      | Acyl-CoA-binding protein                                      | DBI      | 1.25±0.12 | 2.35±0.59 | 0.53 |
| C2_1332     | Acyl-CoA-binding protein homolog                              | DBI      | 2.51±0.8  | 2.83±0.22 | 0.89 |
| C2_6592     | Acyl-coenzyme A thioesterase 11                               | ACOT11   | 0.99±0.08 | 1.49±0.04 | 0.66 |
| C2_39905    | Acyl-coenzyme A thioesterase 13                               | ACOT13   | 0.88±0.11 | 0.8±0.1   | 1.10 |
| C2_9418     | Acyl-coenzyme A thioesterase 3                                | ACOT1    | 1.15±0.13 | 3.34±0.1  | 0.34 |
| C2_1648     | Acyl-protein thioesterase 1                                   | LYPLA1   | 1.02±0.05 | 1.03±0.02 | 0.99 |
| C2_4253     | Acyl-protein thioesterase 2                                   | LYPLA2   | 1.03±0.04 | 2.62±0.56 | 0.40 |
| C3_c23213   | Adapter molecule crk                                          | CRK      | 0.66±0.11 | 0.83±0.07 | 0.79 |
| C2_584      | Adaptin ear-binding coat-associated protein 2                 | NECAP2   | 1.08±0.05 | 1.59±0.24 | 0.68 |

|                  |                                                     |          |           |           |      |
|------------------|-----------------------------------------------------|----------|-----------|-----------|------|
| C2_11692         | Adenine phosphoribosyltransferase                   | APRT     | 1.2±0.07  | 1.36±0.15 | 0.88 |
| C2_7078          | Adenosine deaminase                                 | ADA      | 0.77±0.11 | 0.44±0.02 | 1.73 |
| C2_5126          | Adenosine kinase                                    | ADK      | 0.96±0.02 | 0.66±0.03 | 1.46 |
| C2_39087         | Adenosine kinase 1                                  | ADK      | 0.82±0.1  | 0.63±0.05 | 1.31 |
| C2_2187          | Adenosylhomocysteinase A                            | AHCY     | 0.8±0.13  | 0.19±0.02 | 4.11 |
| C2_6468          | Adenylate kinase 2, mitochondrial                   | AK2      | 0.79±0.07 | 0.99±0.28 | 0.79 |
| C2_6546          | Adenylosuccinate lyase                              | ADSL     | 1.01±0.09 | 0.97±0.05 | 1.04 |
| C2_41283         | Adenylyl cyclase-associated protein 1               | CAP1     | 1.14±0.05 | 0.94±0.07 | 1.21 |
| C2_75777         | Adenylyl cyclase-associated protein 1               | CAP1     | 0.91±0.07 | 0.67±0.06 | 1.37 |
| C2_927           | ADP/ATP translocase 2                               | SLC25A5  | 1.18±0.22 | 0.69±0.06 | 1.69 |
| C2_7332          | ADP-ribose pyrophosphatase, mitochondrial           | NUDT9    | 1.11±0.13 | 1.54±0.07 | 0.72 |
| C2_1001          | ADP-ribosylation factor 1                           | ARF1     | 1.44±0.19 | 2.68±0.37 | 0.54 |
| C2_487           | ADP-ribosylation factor 1-like 2                    | ARF1     | 1.61±0.25 | 2.57±0.16 | 0.62 |
| C2_2038          | ADP-ribosylation factor 4                           | ARF4     | 1.38±0.22 | 2.49±0.38 | 0.55 |
| C2_1092          | ADP-ribosylation factor 6                           | ARF6     | 1.35±0.14 | 1.95±0.2  | 0.69 |
| C2_12596         | ADP-ribosylation factor GTPase-activating protein 2 | ARFGAP2  | 0.81±0.09 | 0.44±0.04 | 1.86 |
| C2_1966          | ADP-ribosylation factor-like protein 1              | ARL1     | 1.31±0.13 | 1.45±0.16 | 0.90 |
| C2_20513         | ADP-ribosylation factor-like protein 8A             | ARL8A    | 0.67±0.11 | 0.6±0.04  | 1.12 |
| C2_2357          | ADP-ribosylation factor-like protein 8B             | ARL8B    | 0.86±0.06 | 0.91±0.07 | 0.94 |
| C2_3920          | ADP-sugar pyrophosphatase                           | NUDT5    | 0.85±0.07 | 0.57±0.04 | 1.49 |
| C2_1101          | Adrenodoxin, mitochondrial                          | FDX1     | 1.01±0.09 | 0.85±0.03 | 1.18 |
| C2_36260         | Afadin                                              | MLLT4    | 1.08±0.09 | 1.35±0.08 | 0.80 |
| C2_970           | Aflatoxin B1 aldehyde reductase member 2            | AKR7A2   | 1.19±0.06 | 1.33±0.02 | 0.89 |
| C2_4151          | Agmatinase, mitochondrial                           | AGMAT    | 0.69±0.14 | 0.2±0.02  | 3.47 |
| C2_4703          | Alanine--glyoxylate aminotransferase 2-like 1       | AGXT2    | 0.9±0.1   | 1.46±0.15 | 0.61 |
| C2_9243          | Alanine--glyoxylate aminotransferase 2-like 2       | AGXT2    | 0.69±0.1  | 1.17±0.06 | 0.60 |
| C2_28761         | Alanyl-tRNA editing protein Aarsd1                  | AARSD1   | 1.01±0.17 | 1.53±0.32 | 0.66 |
| C2_8373          | Alanyl-tRNA synthetase, cytoplasmic                 | AARS     | 0.93±0.03 | 1.1±0.06  | 0.84 |
| C2_4628          | Alanyl-tRNA synthetase, cytoplasmic                 | AARS     | 0.81±0.07 | 0.71±0.07 | 1.15 |
| C2_3044          | Alcohol dehydrogenase [NADP+] A                     | AKR1A1   | 0.79±0.07 | 2.02±0.15 | 0.39 |
| C2_996           | Alcohol dehydrogenase [NADP+] B                     | AKR1A1   | 0.91±0.03 | 1.1±0.1   | 0.83 |
| C2_189           | Alcohol dehydrogenase 1                             | ADH1C    | 0.73±0.14 | 0.4±0.04  | 1.81 |
| C2_288           | Alcohol dehydrogenase class-3                       | ADH5     | 0.76±0.12 | 0.45±0.05 | 1.69 |
| C2_43704         | Alcohol dehydrogenase class-3 chain H               | ADH5     | 0.79±0.16 | 0.11±0.01 | 7.24 |
| C2_33526         | Alcohol dehydrogenase class-3 chain L               | ADH5     | 0.77±0.13 | 0.19±0.02 | 4.02 |
| C2_2085          | Aldehyde dehydrogenase family 1 member L1           | ALDH1L1  | 1.36±0.13 | 1.7±0.11  | 0.80 |
| C2_4444          | Aldehyde dehydrogenase family 16 member A1          | ALDH16A1 | 1.25±0.11 | 2.44±0.12 | 0.51 |
| C2_77670         | Aldehyde dehydrogenase family 8 member A1           | ALDH8A1  | 0.72±0.11 | 0.66±0.05 | 1.10 |
| C2_53791         | Aldehyde dehydrogenase family 8 member A1           | ALDH8A1  | 0.94±0.1  | 0.85±0.03 | 1.10 |
| C2_3814          | Aldehyde dehydrogenase family 9 member A1           | ALDH8A1  | 1.59±0.25 | 2±0.42    | 0.79 |
| C2_8710          | Aldehyde dehydrogenase family 9 member A1-B         | ALDH9A1B | 1.53±0.28 | 1.44±0.22 | 1.06 |
| C2_399           | Aldehyde dehydrogenase, mitochondrial               | ADH2     | 1.61±0.23 | 0.87±0.05 | 1.85 |
| C2_97934         | Aldehyde oxidase                                    | AOX1     | 0.92±0.1  | 0.67±0.06 | 1.36 |
| C2_11977         | Aldehyde oxidase                                    | AOX1     | 0.85±0.11 | 0.51±0.06 | 1.66 |
| C2_83262         | Aldehyde oxidase                                    | AOX1     | 0.84±0.11 | 0.49±0.06 | 1.73 |
| C2_3792          | Aldose 1-epimerase                                  | GALM     | 0.8±0.15  | 0.65±0.11 | 1.22 |
| C2_1189          | Aldose reductase                                    | AKR1B1   | 1.02±0.02 | 1.96±0.13 | 0.52 |
| C2_11780         | Allantoinase, mitochondrial                         | ALN      | 0.8±0.11  | 0.69±0.03 | 1.15 |
| C2_27912         | Allograft inflammatory factor 1-like                | AIF1L    | 0.95±0.09 | 1.63±0.28 | 0.58 |
| C2_97568         | Alpha-(1,6)-fucosyltransferase                      | FUT8     | 0.7±0.12  | 0.36±0.04 | 1.94 |
| C2_14294         | Alpha-1-antitrypsin homolog                         | SERPINA1 | 0.93±0.04 | 0.81±0.14 | 1.15 |
| C2_6331          | Alpha-1-macroglobulin                               | Pzp      | 0.96±0.06 | 1.07±0.17 | 0.90 |
| C2_9982          | Alpha-2-antiplasmin                                 | SERPINF2 | 0.89±0.05 | 0.75±0.1  | 1.19 |
| C2_22548         | Alpha-2-HS-glycoprotein                             | AHSG     | 1±0.08    | 1.66±0.59 | 0.60 |
| s_flp0005a11_f_1 | Alpha-2-macroglobulin                               | Pzp      | 1.14±0.11 | 1.33±0.21 | 0.86 |
| C2_23524         | Alpha-2-macroglobulin-like protein 1                | A2ML1    | 0.94±0.03 | 1.87±0.82 | 0.50 |
| C2_1801          | Alpha-actinin-3                                     | Actn3    | 1.85±0.37 | 1.98±0.19 | 0.93 |
| C2_26557         | Alpha-actinin-4                                     | ACTN4    | 1.72±0.29 | 1.7±0.13  | 1.01 |
| C2_25967         | Alpha-adducin                                       | ADD1     | 1.28±0.1  | 2.06±0.35 | 0.62 |
| C2_1946          | Alpha-aminoadipic semialdehyde dehydrogenase        | ALDH7A1  | 0.88±0.13 | 0.44±0.05 | 1.97 |
| C2_16242         | Alpha-aspartyl dipeptidase                          | AAD-A    | 1.87±0.3  | 1.7±0.06  | 1.10 |
| C2_440           | Alpha-enolase                                       | ENO1     | 1.12±0.06 | 2.25±0.14 | 0.50 |
| C2_23595         | Alpha-glucosidase 2                                 | GAA      | 1±0.07    | 1.19±0.06 | 0.84 |
| C2_17154         | Alpha-mannosidase 2C1                               | MAN2C1   | 0.79±0.1  | 0.54±0.04 | 1.47 |
| C2_52709         | Alpha-methylacyl-CoA racemase                       | AMACR    | 0.72±0.1  | 0.29±0.02 | 2.46 |
| C2_1063          | Alpha-N-acetylgalactosaminidase                     | NAGA     | 0.84±0.09 | 1.03±0.1  | 0.81 |
| C2_7302          | Alpha-N-acetylglucosaminidase                       | NAGLU    | 0.79±0.1  | 0.6±0.07  | 1.33 |

|                 |                                                                                 |          |            |           |      |
|-----------------|---------------------------------------------------------------------------------|----------|------------|-----------|------|
| C2_62996        | Alpha-N-acetylglucosaminidase                                                   | NAGLU    | 0.67±0.14  | 0.32±0.04 | 2.11 |
| C2_5411         | Alpha-parvin                                                                    | PARVA    | 52.87±17.6 | 76.65±8.3 | 0.69 |
| C2_1920         | Alpha-soluble NSF attachment protein                                            | NAPA     | 0.95±0.07  | 1.48±0.15 | 0.65 |
| C2_2739         | Amiloride-sensitive amine oxidase [copper-containing]                           | AOC1     | 0.82±0.08  | 0.63±0.08 | 1.30 |
| C2_7596         | Amine oxidase [flavin-containing]                                               | MAOB     | 1.46±0.24  | 0.39±0.01 | 3.75 |
| C2_23714        | Amine oxidase [flavin-containing] A                                             | MAOA     | 0.93±0.12  | 0.44±0.03 | 2.11 |
| C2_52395        | Amine sulfotransferase                                                          | Gm4794   | 0.92±0.04  | 1.41±0.19 | 0.65 |
| C2_616          | Aminoacyl tRNA synthase complex-interacting multifunctional protein 1           | AIMP1    | 1.51±0.28  | 1.99±0.12 | 0.76 |
| C2_12687        | Aminoacyl tRNA synthase complex-interacting multifunctional protein 2           | AIMP2    | 1.02±0.02  | 1.11±0.02 | 0.92 |
| C2_1372         | Aminoacylase-1                                                                  | ACY1     | 0.77±0.12  | 0.65±0.06 | 1.18 |
| C2_73930        | Aminoglycoside phosphotransferase domain-containing protein 1                   | HYKK     | 1.22±0.14  | 3.68±0.17 | 0.33 |
| C3_c17712       | Aminomethyltransferase, mitochondrial                                           | AMT      | 1.48±0.16  | 0.61±0.02 | 2.41 |
| C2_7522         | Aminopeptidase N                                                                | ANPEP    | 0.71±0.11  | 0.84±0.11 | 0.84 |
| C2_16955        | AMP deaminase 2                                                                 | AMPD2    | 1.37±0.17  | 2.19±0.14 | 0.62 |
| C2_43976        | Amyloid beta A4 precursor protein-binding family B member 1-interacting protein | APBB1IP  | 0.86±0.08  | 1.03±0.05 | 0.84 |
| C2_94051        | Angiotensin-converting enzyme                                                   | ACE      | 0.63±0.13  | 0.35±0.04 | 1.79 |
| C2_49201        | Angiotensin-converting enzyme                                                   | ACE      | 0.6±0.14   | 0.27±0.03 | 2.18 |
| C2_31056        | Angiotensin-converting enzyme                                                   | ACE      | 0.62±0.13  | 0.28±0.04 | 2.21 |
| C2_2687         | Angiotensin-converting enzyme                                                   | ACE      | 0.67±0.12  | 0.27±0.03 | 2.50 |
| C2_1538         | Angiotensin-converting enzyme 2                                                 | ACE2     | 0.58±0.15  | 0.26±0.03 | 2.22 |
| C2_89317        | Angiotensin-converting enzyme 2                                                 | ACE2     | 0.48±0.17  | 0.19±0.03 | 2.48 |
| C2_17965        | Angiotensinogen                                                                 | AGT      | 0.88±0.08  | 1.3±0.29  | 0.67 |
| C2_1919         | Anionic trypsin-2                                                               | PRSS2    | 0.52±0.17  | 0.29±0.08 | 1.79 |
| C2_98249        | Ankyrin repeat and FYVE domain-containing protein 1                             | ANKFY1   | 1.03±0.07  | 1.95±0.42 | 0.53 |
| C2_5024         | Ankyrin repeat and FYVE domain-containing protein 1                             | ANKFY1   | 1.24±0.13  | 1.65±0.04 | 0.75 |
| C2_6506         | Ankyrin repeat and SAM domain-containing protein 4B                             | ANKS4B   | 1.31±0.19  | 2.26±0.12 | 0.58 |
| C3_c47959       | Ankyrin-3                                                                       | ANK3     | 0.83±0.07  | 1.15±0.21 | 0.72 |
| C2_1550         | Annexin A1                                                                      | ANXA1    | 0.79±0.09  | 0.59±0.06 | 1.33 |
| C2_2096         | Annexin A11                                                                     | ANXA11   | 1.04±0.07  | 0.65±0.05 | 1.61 |
| C2_3972         | Annexin A13                                                                     | ANXA13   | 1.31±0.18  | 0.48±0.03 | 2.74 |
| C2_2251         | Annexin A2                                                                      | ANXA2    | 0.92±0.08  | 0.73±0.17 | 1.27 |
| C2_5883         | Annexin A2-A                                                                    | ANXA2    | 3.32±1.06  | 1.47±0.07 | 2.27 |
| C2_930          | Annexin A3                                                                      | ANXA3    | 1.39±0.2   | 1.24±0.09 | 1.12 |
| C2_88           | Annexin A4                                                                      | ANXA4    | 1.09±0.17  | 0.36±0.04 | 3.05 |
| C2_772          | Annexin A5                                                                      | ANXA5    | 1.22±0.12  | 0.68±0.08 | 1.79 |
| C2_4250         | Annexin A6                                                                      | ANXA6    | 1.23±0.14  | 0.65±0.05 | 1.89 |
| C2_4218         | Anterior gradient protein 2 homolog                                             | AGR2     | 1.78±0.35  | 1.21±0.13 | 1.47 |
| C3_c16373       | Antithrombin-III                                                                | SERPINC1 | 1.04±0.04  | 1.03±0.14 | 1.01 |
| C2_11830        | AP-1 complex subunit beta-1                                                     | AP1B1    | 1.21±0.09  | 2.21±0.17 | 0.55 |
| C2_28545        | AP-1 complex subunit beta-1                                                     | AP1B1    | 0.95±0.03  | 1.19±0.05 | 0.80 |
| C2_37278        | AP-1 complex subunit beta-1                                                     | AP1B1    | 1.27±0.09  | 1.2±0.02  | 1.06 |
| C2_8787         | AP-1 complex subunit gamma-1                                                    | AP1G1    | 1.23±0.12  | 1.54±0.02 | 0.80 |
| C2_18258        | AP-1 complex subunit gamma-like 2                                               | AP1G2    | 0.95±0.13  | 1.01±0.11 | 0.94 |
| C2_2248         | AP-1 complex subunit mu-2                                                       | AP1M2    | 1.1±0.07   | 1.39±0.19 | 0.79 |
| C2_9477         | AP-1 complex subunit sigma-1A                                                   | AP1S1    | 0.82±0.08  | 1.16±0.06 | 0.71 |
| C2_82848        | AP-2 complex subunit alpha-1                                                    | AP2A1    | 1±0.05     | 1.15±0.07 | 0.87 |
| C2_13693        | AP-2 complex subunit alpha-1                                                    | AP2A1    | 1.27±0.09  | 1.37±0.09 | 0.93 |
| C2_29524        | AP-2 complex subunit alpha-2                                                    | AP2A2    | 0.82±0.07  | 3.02±0.77 | 0.27 |
| C2_12233        | AP-2 complex subunit alpha-2                                                    | AP2A2    | 0.8±0.08   | 1.18±0.21 | 0.68 |
| C2_5784         | AP-2 complex subunit beta                                                       | Ap2b1    | 0.98±0.11  | 0.73±0.06 | 1.34 |
| C2_1474         | AP-2 complex subunit mu-1-A                                                     | AP2M1    | 1.08±0.07  | 1.47±0.02 | 0.74 |
| C2_678          | AP-2 complex subunit sigma                                                      | AP2S1    | 1.12±0.09  | 0.99±0.06 | 1.14 |
| C2_4970         | AP-3 complex subunit delta-1                                                    | AP3D1    | 1±0.03     | 1.51±0.17 | 0.66 |
| C2_5231         | AP-3 complex subunit delta-1                                                    | AP3D1    | 0.75±0.12  | 0.64±0.05 | 1.17 |
| C2_79275        | AP-3 complex subunit delta-1                                                    | AP3D1    | 1.15±0.15  | 0.7±0.1   | 1.63 |
| C2_11663        | AP-3 complex subunit mu-1                                                       | AP3M1    | 0.97±0.05  | 0.99±0.05 | 0.98 |
| C2_31643        | AP-3 complex subunit mu-2                                                       | AP3M2    | 1.13±0.11  | 1.94±0.11 | 0.58 |
| C2_6208         | Apical endosomal glycoprotein                                                   | MAMDC4   | 0.77±0.11  | 0.46±0.02 | 1.68 |
| C3_c37563       | APOBEC1 complementation factor                                                  | A1CF     | 0.88±0.05  | 1.18±0.21 | 0.75 |
| C2_120884       | Apolipoprotein A-I                                                              | APOA1    | 3.29±1.44  | 9.39±2.53 | 0.35 |
| C2_4177         | Apolipoprotein A-I-binding protein                                              | APOA1    | 1.01±0.05  | 0.98±0.06 | 1.03 |
| C2_23243        | Apolipoprotein A-IV                                                             | APOA4    | 1.61±0.63  | 1.85±1.01 | 0.87 |
| C3_lrc60236     | apolipoprotein A-IV-like isoform X1 [Maylandia zebra]                           | APOA4    | 1.57±0.43  | 3.27±1.33 | 0.48 |
| s_rl0001e11_f_1 | Apolipoprotein B-100                                                            | APOB     | 0.77±0.1   | 0.7±0.1   | 1.10 |

|           |                                                                        |            |           |           |      |
|-----------|------------------------------------------------------------------------|------------|-----------|-----------|------|
| C3_c28587 | Apolipoprotein B-100                                                   | APOB       | 0.95±0.06 | 0.79±0.07 | 1.21 |
| AM973748  | Apolipoprotein B-100                                                   | APOB       | 1.68±0.27 | 1.13±0.2  | 1.48 |
| C2_15164  | Apolipoprotein B-100                                                   | APOB       | 1.28±0.14 | 0.84±0.1  | 1.53 |
| C2_5614   | Apolipoprotein B-100                                                   | APOB       | 1.31±0.17 | 0.54±0.07 | 2.42 |
| C2_28992  | Apolipoprotein B-100                                                   | APOB       | 0.88±0.17 | 0.23±0.02 | 3.85 |
| C3_c2363  | apolipoprotein B-100-like [Oreochromis niloticus]                      | APOB       | 0.8±0.1   | 0.77±0.17 | 1.03 |
| C2_5591   | Apolipoprotein Eb                                                      | APOEB      | 1.12±0.18 | 1.93±0.64 | 0.58 |
| C2_28734  | Apolipoprotein M                                                       | APOM       | 1.4±0.21  | 1.91±0.35 | 0.73 |
| C2_9385   | Apoptosis inhibitor 5                                                  | API5       | 0.97±0.02 | 2.2±0.72  | 0.44 |
| C2_322    | Apoptosis-associated speck-like protein containing a CARD              | PYCARD     | 1.55±0.49 | 4.09±0.51 | 0.38 |
| C2_1626   | Apoptosis-associated speck-like protein containing a CARD              | PYCARD     | 0.8±0.08  | 1.55±0.25 | 0.51 |
| C2_6260   | Apoptosis-inducing factor 1, mitochondrial                             | AIFM1      | 1.36±0.13 | 0.75±0.04 | 1.81 |
| C2_6887   | Apoptosis-inducing factor 3                                            | AIFM3      | 0.94±0.06 | 1.32±0.09 | 0.71 |
| C2_19566  | Apoptotic protease-activating factor 1                                 | APAF1      | 1.83±0.32 | 1.55±0.08 | 1.18 |
| C2_489    | Arachidonate 12-lipoxygenase, 12R-type                                 | ALOX12B    | 0.8±0.09  | 0.86±0.13 | 0.93 |
| C2_1821   | Arfaptin-1                                                             | ARFIP1     | 0.74±0.1  | 1.07±0.11 | 0.69 |
| C2_14892  | Arf-GAP with SH3 domain, ANK repeat and PH domain-containing protein 2 | ASAP2      | 1.1±0.16  | 2.53±0.35 | 0.43 |
| C2_19914  | Arginyl-tRNA synthetase, cytoplasmic                                   | RARS       | 1.18±0.1  | 1.93±0.24 | 0.62 |
| C2_69580  | Arginyl-tRNA synthetase, cytoplasmic                                   | RARS       | 1.05±0.07 | 1.55±0.15 | 0.68 |
| C2_29167  | Aromatic-L-amino-acid decarboxylase                                    | DDC        | 0.87±0.05 | 1.24±0.07 | 0.70 |
| C2_43142  | Arrestin domain-containing protein 1                                   | ARRDC1     | 0.73±0.11 | 0.6±0.07  | 1.21 |
| C2_857    | Arsenite methyltransferase                                             | AS3MT      | 2.15±0.57 | 1.71±0.31 | 1.26 |
| C2_3422   | Arylamine N-acetyltransferase, pineal gland isozyme NAT-10             | NAT1       | 1.26±0.09 | 2.29±0.42 | 0.55 |
| C2_43004  | Arylsulfatase B                                                        | ARSB       | 0.88±0.11 | 1.01±0.15 | 0.87 |
| C2_3390   | Asparaginyl-tRNA synthetase, cytoplasmic                               | NARS       | 1.24±0.1  | 1.4±0.09  | 0.88 |
| C2_14096  | Aspartate aminotransferase, cytoplasmic                                | GOT1       | 0.73±0.1  | 0.51±0.05 | 1.44 |
| C2_645    | Aspartate aminotransferase, mitochondrial                              | GOT2       | 0.88±0.15 | 0.37±0.04 | 2.37 |
| C2_4570   | Aspartoacylase                                                         | ASPA       | 0.75±0.09 | 0.58±0.05 | 1.29 |
| C2_1059   | Aspartoacylase-2B                                                      | ACY3       | 0.85±0.08 | 0.67±0.04 | 1.27 |
| C2_15853  | Aspartyl aminopeptidase                                                | DNPEP      | 0.7±0.16  | 0.28±0.03 | 2.54 |
| C2_2153   | Aspartyl-tRNA synthetase, cytoplasmic                                  | ARSA       | 1.16±0.1  | 1.91±0.79 | 0.61 |
| C3_c41038 | Astrocytic phosphoprotein PEA-15                                       | PEA15      | 0.73±0.11 | 0.63±0.06 | 1.15 |
| C2_23566  | Atlastin-3                                                             | ATL3       | 0.75±0.08 | 0.45±0.03 | 1.68 |
| C2_736    | ATP synthase lipid-binding protein, mitochondrial                      | ARSA       | 1.52±0.31 | 0.47±0.1  | 3.23 |
| C2_1751   | ATP synthase subunit alpha, mitochondrial                              | ATP5A1     | 1.32±0.25 | 0.82±0.03 | 1.62 |
| C2_176    | ATP synthase subunit b, mitochondrial                                  | ATP5A1     | 1.18±0.14 | 0.71±0.07 | 1.65 |
| C2_1973   | ATP synthase subunit beta, mitochondrial                               | ATP5B      | 1.45±0.3  | 1±0.08    | 1.45 |
| C2_939    | ATP synthase subunit gamma, mitochondrial                              | ATP5C1     | 2.17±0.64 | 1.1±0.07  | 1.97 |
| C2_2391   | ATPase asna1                                                           | ASNA1      | 1.41±0.22 | 1.65±0.14 | 0.85 |
| C2_7005   | ATP-binding cassette sub-family D member 3                             | ABCD3      | 2.43±0.6  | 0.57±0.05 | 4.23 |
| C2_2323   | ATP-binding cassette sub-family E member 1                             | ABCE1      | 1.13±0.05 | 1.29±0.03 | 0.88 |
| C2_1676   | ATP-binding cassette sub-family F member 1                             | ABCF1      | 1.49±0.24 | 1.09±0.15 | 1.37 |
| C2_8958   | ATP-citrate synthase                                                   | ACLY       | 1.52±0.21 | 1.66±0.14 | 0.92 |
| C3_c19506 | ATP-citrate synthase                                                   | ACLY       | 1.12±0.07 | 0.64±0.05 | 1.74 |
| C2_9938   | ATP-dependent RNA helicase DDX18                                       | DDX18      | 1±0.04    | 1.18±0.09 | 0.85 |
| C2_1283   | ATP-dependent RNA helicase DDX39A                                      | DDX39A     | 1.27±0.17 | 2.3±0.39  | 0.55 |
| C2_20811  | ATP-dependent RNA helicase DDX3Y                                       | DDX3Y      | 1.36±0.2  | 2±0.28    | 0.68 |
| C2_94749  | ATP-dependent RNA helicase DDX42                                       | DDX42      | 0.79±0.14 | 0.62±0.09 | 1.29 |
| C2_5878   | Autophagy-related protein 16-1                                         | ATG16L1    | 0.93±0.03 | 0.82±0.04 | 1.14 |
| C2_214    | Bactericidal permeability-increasing protein                           | BPI        | 0.89±0.09 | 0.93±0.19 | 0.96 |
| C2_5274   | Baculoviral IAP repeat-containing protein 4                            | XIAP       | 0.92±0.1  | 0.5±0.06  | 1.83 |
| C2_6477   | Band 4.1-like protein 3                                                | EPB41L3    | 1.14±0.08 | 1.45±0.08 | 0.79 |
| C2_18157  | Band 4.1-like protein 5                                                | EPB41L5    | 1.06±0.1  | 1.27±0.12 | 0.83 |
| C2_111896 | Band 7 protein AAEL010189                                              | AAEL010189 | 1.13±0.27 | 0.45±0.03 | 2.50 |
| C2_1409   | Barrier-to-autointegration factor                                      | BANF1      | 1.06±0.09 | 0.58±0.1  | 1.82 |
| C2_10232  | Barrier-to-autointegration factor-like protein                         | BANF2      | 1.03±0.07 | 0.6±0.07  | 1.71 |
| C2_871    | Basic leucine zipper and W2 domain-containing protein 1-A              | BZW1       | 1.11±0.05 | 1.12±0.06 | 0.99 |
| C2_8263   | Beta,beta-carotene 15,15'-monooxygenase                                | BCO1       | 1.44±0.15 | 0.94±0.03 | 1.53 |
| C2_7258   | Beta,beta-carotene 9',10'-oxygenase                                    | BCO2       | 1.14±0.07 | 1.42±0.23 | 0.81 |
| C2_28     | Beta-2-microglobulin                                                   | B2M        | 1.24±0.13 | 0.85±0.04 | 1.46 |
| C2_19834  | Beta-actin-like protein 2                                              | ACTBL2     | 1.07±0.03 | 2.95±0.57 | 0.36 |
| C2_69899  | Beta-centractin                                                        | ACTR1B     | 1.03±0.07 | 1.49±0.17 | 0.69 |
| C2_370    | Beta-enolase                                                           | ENO3       | 0.89±0.04 | 0.49±0.03 | 1.80 |
| C2_2136   | Beta-galactosidase                                                     | GLB1       | 1.04±0.07 | 1.51±0.14 | 0.69 |
| C2_26906  | Beta-galactosidase-1-like protein 2                                    | GLB1L2     | 1.02±0.08 | 0.72±0.01 | 1.41 |
| C2_14188  | Beta-galactosidase-1-like protein 2                                    | GLB1L2     | 0.99±0.03 | 0.64±0.04 | 1.55 |

|           |                                                                             |          |           |            |      |
|-----------|-----------------------------------------------------------------------------|----------|-----------|------------|------|
| C2_68077  | Beta-galactosidase-1-like protein 3                                         | GLB1L3   | 0.85±0.06 | 0.66±0.07  | 1.30 |
| C2_8457   | Beta-glucuronidase                                                          | GUSB     | 0.75±0.14 | 0.27±0.03  | 2.81 |
| C2_3871   | Beta-hexosaminidase subunit beta                                            | HEXB     | 0.78±0.14 | 0.57±0.12  | 1.36 |
| C2_43304  | Betaine--homocysteine S-methyltransferase 1                                 | BHMT     | 0.72±0.1  | 0.85±0.12  | 0.85 |
| C2_110871 | Betaine--homocysteine S-methyltransferase 1                                 | BHMT     | 1.22±0.31 | 0.26±0.02  | 4.64 |
| C2_79951  | Betaine--homocysteine S-methyltransferase 2                                 | BHMT     | 0.84±0.08 | 0.23±0.02  | 3.64 |
| C2_5459   | Beta-ureidopropionase                                                       | UPB1     | 0.78±0.12 | 0.44±0.04  | 1.76 |
| C2_3176   | Bifunctional 3'-phosphoadenosine 5'-phosphosulfate synthase 2               | PAPSS2   | 0.94±0.03 | 2.52±0.72  | 0.37 |
| C2_48204  | Bifunctional aminoacyl-tRNA synthetase                                      | EPRS     | 1.29±0.14 | 1.98±0.06  | 0.65 |
| C2_4884   | Bifunctional aminoacyl-tRNA synthetase                                      | EPRS     | 1.24±0.14 | 1.71±0.12  | 0.73 |
| C2_6394   | Bifunctional polynucleotide phosphatase/kinase                              | PNKP     | 0.91±0.09 | 1.05±0.22  | 0.87 |
| C2_4731   | Bifunctional protein NCOAT                                                  | MGEA5    | 1.14±0.08 | 2.44±0.47  | 0.47 |
| C2_4254   | Bifunctional purine biosynthesis protein PURH                               | ATIC     | 0.93±0.03 | 1.17±0.06  | 0.79 |
| C2_20039  | Bifunctional UDP-N-acetylglucosamine 2-epimerase/N-acetylmannosamine kinase | GNE      | 0.53±0.16 | 0.21±0.02  | 2.48 |
| C2_73027  | Bile salt-activated lipase                                                  | CEL      | 0.65±0.12 | 0.36±0.01  | 1.82 |
| C2_1589   | Biliverdin reductase A                                                      | BLVRA    | 1.03±0.03 | 1.03±0.06  | 1.01 |
| C2_1056   | Biogenesis of lysosome-related organelles complex 1 subunit 1               | BLOC1S1  | 0.93±0.11 | 1.09±0.11  | 0.86 |
| C2_9034   | Biogenesis of lysosome-related organelles complex 1 subunit 2               | BLOC1S2  | 0.97±0.05 | 1.5±0.1    | 0.65 |
| C2_29998  | Biotinidase                                                                 | BDT      | 0.93±0.04 | 0.81±0.11  | 1.14 |
| C2_17007  | Bis(5'-nucleosyl)-tetrakisphosphate [asymmetrical]                          | NUDT2    | 1.4±0.14  | 1.73±0.04  | 0.81 |
| C2_885    | Bleomycin hydrolase                                                         | BLMH     | 0.76±0.1  | 0.46±0.05  | 1.67 |
| C2_4365   | BolA-like protein 1                                                         | BOLA1    | 0.79±0.12 | 0.78±0.13  | 1.01 |
| C2_15564  | Brain-specific angiogenesis inhibitor 1-associated protein 2-like protein 2 | BAIAP2L2 | 0.71±0.1  | 1.11±0.15  | 0.64 |
| C2_1593   | BRCA1-A complex subunit BRE                                                 | BRE      | 1.06±0.05 | 1.16±0.08  | 0.91 |
| C2_692    | BRCA2 and CDKN1A-interacting protein                                        | BCCIP    | 1±0.05    | 1.06±0.07  | 0.94 |
| C2_24767  | Breast cancer anti-estrogen resistance protein 1                            | BCAR1    | 0.89±0.05 | 0.94±0.08  | 0.95 |
| C2_79857  | Breast cancer anti-estrogen resistance protein 3                            | BCAR3    | 1.01±0.04 | 0.95±0.06  | 1.06 |
| C3_c10749 | Brefeldin A-inhibited guanine nucleotide-exchange protein 1                 | ARFGEF1  | 1.96±0.41 | 1.6±0.19   | 1.23 |
| C2_11359  | Bridging integrator 2                                                       | BIN2     | 2.54±0.98 | 13.08±3.54 | 0.19 |
| C2_14149  | BRISC and BRCA1-A complex member 1                                          | BABAM1   | 1.04±0.03 | 1.31±0.05  | 0.79 |
| C2_65091  | Butyrophilin subfamily 2 member A3                                          | BTN3A3   | 1.16±0.16 | 0.72±0.05  | 1.62 |
| C2_27587  | Butyrophilin-like protein 2                                                 | BTNL2    | 0.93±0.13 | 0.25±0.03  | 3.68 |
| C2_111124 | Butyrophilin-like protein 8                                                 | BTNL8    | 1.32±0.22 | 0.52±0.05  | 2.55 |
| C2_22710  | CAAX prenyl protease 1 homolog                                              | ZMPSTE24 | 0.98±0.08 | 0.58±0.03  | 1.71 |
| C2_5533   | CAAX prenyl protease 1 homolog                                              | ZMPSTE24 | 0.99±0.14 | 0.27±0.01  | 3.66 |
| C2_48101  | Cadherin EGF LAG seven-pass G-type receptor 1                               | CELSR1   | 0.66±0.11 | 0.65±0.07  | 1.03 |
| C2_2045   | Cadherin-1                                                                  | CDH1     | 0.91±0.1  | 0.6±0.06   | 1.51 |
| C2_3038   | Cadherin-17                                                                 | CDH17    | 0.9±0.14  | 0.33±0.02  | 2.73 |
| C2_20741  | Cadherin-23                                                                 | CDH23    | 0.49±0.17 | 0.39±0.03  | 1.28 |
| C2_116735 | Cadherin-89D                                                                | CAD89D   | 0.65±0.12 | 0.61±0.05  | 1.08 |
| C2_70214  | Cadherin-related family member 2                                            | CDHR2    | 0.59±0.14 | 0.53±0.06  | 1.11 |
| C2_5783   | Cadherin-related family member 2                                            | CDHR2    | 0.81±0.09 | 0.64±0.07  | 1.26 |
| C2_25329  | Cadherin-related family member 2                                            | CDHR2    | 0.58±0.14 | 0.42±0.04  | 1.38 |
| C2_23986  | Calcineurin subunit B type 1                                                | PPP3R1   | 1.46±0.26 | 1.38±0.01  | 1.06 |
| C2_33603  | Calcium/calmodulin-dependent protein kinase type 1                          | CAMK1    | 0.99±0.07 | 2.35±0.32  | 0.42 |
| C2_54503  | Calcium/calmodulin-dependent protein kinase type II delta chain             | CAMK2D   | 0.9±0.04  | 0.68±0.07  | 1.32 |
| C2_22563  | Calcium/calmodulin-dependent protein kinase type II subunit gamma           | CAMK2G   | 1.42±0.3  | 2.18±0.3   | 0.65 |
| C2_14650  | Calcium-binding protein 39                                                  | CAB39    | 1.1±0.1   | 1.6±0.12   | 0.69 |
| C2_3736   | Calcium-binding protein 39-like                                             | CAB39L   | 1.5±0.24  | 1.84±0.23  | 0.81 |
| C2_1929   | Calcium-binding protein p22                                                 | CHP1     | 0.98±0.13 | 0.33±0.03  | 3.02 |
| C2_1095   | Calcyclin-binding protein                                                   | CACYBP   | 0.92±0.05 | 0.61±0.08  | 1.49 |
| C2_103184 | Calmodulin                                                                  | CALM1    | 1.62±0.33 | 1.71±0.06  | 0.95 |
| C2_98055  | Calmodulin-like protein 4                                                   | CALML4   | 1.13±0.22 | 1.27±0.19  | 0.89 |
| C2_19770  | Calnexin                                                                    | CANX     | 1.53±0.23 | 0.5±0.05   | 3.08 |
| C2_5497   | Calpain small subunit 1                                                     | CAPNS1   | 0.99±0.07 | 1.26±0.07  | 0.79 |
| C2_7535   | Calpain small subunit 1                                                     | CAPNS1   | 1.02±0.1  | 1.21±0.03  | 0.84 |
| C2_15607  | Calpain-1 catalytic subunit                                                 | CAPN1    | 0.68±0.13 | 0.64±0.1   | 1.06 |
| C2_4520   | Calpain-2 catalytic subunit                                                 | CAPN2    | 1.18±0.06 | 1.15±0.01  | 1.02 |
| C3_c11665 | Calpain-5                                                                   | CAPN5    | 1.4±0.45  | 1.46±0.21  | 0.96 |
| C2_61779  | Calpain-9                                                                   | CAPN9    | 1.17±0.09 | 2.03±0.19  | 0.58 |
| C2_12340  | Calpastatin                                                                 | CAST     | 1.21±0.21 | 2.18±0.37  | 0.56 |
| C2_1023   | Calreticulin                                                                | CALR     | 2.78±0.7  | 1.38±0.05  | 2.01 |
| C2_15813  | cAMP-dependent protein kinase catalytic subunit alpha                       | PRKACA   | 0.83±0.07 | 0.95±0.04  | 0.87 |
| C2_6010   | cAMP-dependent protein kinase type II-alpha regulatory subunit              | PRKAR2A  | 0.93±0.04 | 1.36±0.15  | 0.68 |

|           |                                                           |          |           |           |      |
|-----------|-----------------------------------------------------------|----------|-----------|-----------|------|
| C2_45801  | Caprin-2                                                  | CAPRIN2  | 1.34±0.16 | 1.34±0.32 | 1.00 |
| C2_2482   | Carbohydrate kinase domain-containing protein             | CARKD    | 0.97±0.07 | 0.61±0.03 | 1.59 |
| C2_1572   | Carbonic anhydrase                                        | CA13     | 0.86±0.12 | 0.78±0.08 | 1.10 |
| C2_1891   | Carbonic anhydrase 1                                      | CA1      | 1.45±0.19 | 1.61±0.17 | 0.90 |
| C2_15533  | Carbonic anhydrase 5B, mitochondrial                      | CASB     | 0.86±0.07 | 1.18±0.15 | 0.73 |
| C2_14726  | Carbonyl reductase [NADPH] 1                              | CBR1     | 1.28±0.19 | 1.79±0.26 | 0.71 |
| C2_32418  | Carboxylesterase 5A                                       | CE55A    | 1.05±0.08 | 0.87±0.07 | 1.21 |
| C2_1812   | Carboxymethylenebutenolidase homolog                      | CMBL     | 0.68±0.13 | 0.35±0.04 | 1.95 |
| C2_936    | Carboxypeptidase A1                                       | CPA1     | 0.74±0.2  | 0.32±0.08 | 2.31 |
| C2_5650   | Carboxypeptidase A2                                       | CPA2     | 0.73±0.14 | 0.41±0.07 | 1.77 |
| C2_2018   | Carboxypeptidase B                                        | CPB1     | 0.8±0.18  | 0.36±0.07 | 2.20 |
| C2_79368  | Carboxypeptidase N subunit 2                              | CPN2     | 1.08±0.13 | 0.9±0.12  | 1.20 |
| C2_4458   | Carboxypeptidase O                                        | CPO      | 0.61±0.13 | 0.28±0.04 | 2.16 |
| C2_30675  | Carcinoembryonic antigen-related cell adhesion molecule 1 | CEACAM1  | 0.82±0.07 | 0.83±0.12 | 0.98 |
| C2_29179  | Carcinoembryonic antigen-related cell adhesion molecule 5 | Ceacam5  | 0.79±0.13 | 0.48±0.08 | 1.66 |
| C2_10090  | Carcinoembryonic antigen-related cell adhesion molecule 6 | CEACAM6  | 0.76±0.09 | 0.6±0.08  | 1.26 |
| C2_6038   | Carnitine O-acetyltransferase                             | CRAT     | 1.31±0.11 | 0.93±0.05 | 1.40 |
| C2_4920   | Carnitine O-palmitoyltransferase 1, liver isoform         | CPT1A    | 1.52±0.29 | 0.62±0.1  | 2.45 |
| C2_2166   | Carnitine O-palmitoyltransferase 2, mitochondrial         | CPT2     | 1.67±0.36 | 0.82±0.1  | 2.04 |
| C2_7099   | Casein kinase I isoform alpha                             | CSNK1A1  | 0.79±0.08 | 1.05±0.15 | 0.75 |
| C2_540    | Casein kinase II subunit alpha                            | CSNK2A1  | 1.05±0.05 | 0.79±0.07 | 1.33 |
| C2_8203   | Casein kinase II subunit beta                             | CSNK2B   | 0.87±0.08 | 0.54±0.05 | 1.61 |
| C2_16670  | Caspase-1                                                 | CASP1    | 1.13±0.12 | 1.86±0.36 | 0.61 |
| C2_85583  | Caspase-1-A                                               | CASP1    | 0.87±0.1  | 0.81±0.17 | 1.07 |
| C2_3535   | Caspase-3                                                 | CASP3    | 0.93±0.03 | 0.79±0.04 | 1.18 |
| C2_5709   | Caspase-6                                                 | CASP6    | 1.07±0.05 | 1.54±0.12 | 0.69 |
| C2_4205   | Caspase-8                                                 | CASP8    | 0.91±0.07 | 0.96±0.11 | 0.95 |
| C2_997    | Catalase                                                  | CAT      | 1.91±0.36 | 0.85±0.05 | 2.25 |
| C2_872    | Catechol O-methyltransferase domain-containing protein 1  | COMTD1   | 0.75±0.14 | 0.44±0.03 | 1.72 |
| C2_13472  | Catenin alpha-1                                           | CTNNA1   | 1.35±0.18 | 2.82±0.23 | 0.48 |
| C2_78432  | Catenin alpha-1                                           | CTNNA1   | 0.79±0.11 | 0.4±0.04  | 2.01 |
| C2_25912  | Catenin beta-1                                            | CTNNB1   | 1.11±0.05 | 1.78±0.17 | 0.63 |
| C2_23957  | Catenin delta-1                                           | CTNND1   | 1.06±0.04 | 1.38±0.26 | 0.77 |
| C2_11960  | Cathepsin D                                               | CTSD     | 0.68±0.15 | 0.31±0.03 | 2.21 |
| C2_21     | Cathepsin L                                               | CTSL     | 0.72±0.09 | 4.16±1.07 | 0.17 |
| C2_108360 | Cathepsin S                                               | CTSS     | 0.77±0.11 | 0.44±0.05 | 1.74 |
| C2_1045   | Cathepsin Z                                               | CTSZ     | 0.62±0.16 | 0.56±0.13 | 1.11 |
| C2_6981   | Cation-independent mannose-6-phosphate receptor           | IGF2R    | 1.18±0.22 | 0.51±0.06 | 2.32 |
| C2_67046  | CCR4-NOT transcription complex subunit 1                  | CNOT1    | 0.92±0.08 | 1.03±0.16 | 0.89 |
| C2_7739   | CCR4-NOT transcription complex subunit 1                  | CNOT1    | 0.86±0.09 | 0.96±0.02 | 0.90 |
| C2_21127  | CCR4-NOT transcription complex subunit 1                  | CNOT1    | 1.26±0.18 | 1.19±0.06 | 1.06 |
| C2_14565  | CCR4-NOT transcription complex subunit 10                 | CNOT10   | 0.65±0.12 | 0.22±0.04 | 3.03 |
| C2_10479  | CCR4-NOT transcription complex subunit 6                  | CNOT6    | 1.25±0.2  | 1.54±0.07 | 0.81 |
| C2_9606   | CD2-associated protein                                    | CD2AP    | 0.91±0.15 | 1.44±0.35 | 0.63 |
| C2_211    | CDGSH iron-sulfur domain-containing protein 1             | CISD1    | 0.9±0.06  | 0.55±0.08 | 1.63 |
| C2_6264   | CDK5 regulatory subunit-associated protein 3              | CDK5RAP3 | 0.94±0.02 | 0.83±0.04 | 1.14 |
| C2_2412   | Cell differentiation protein RCD1 homolog                 | RQCD1    | 1.34±0.22 | 1.78±0.06 | 0.75 |
| C2_99597  | Cell division control protein 42                          | CDK1     | 1.22±0.08 | 1.6±0.12  | 0.76 |
| C2_1548   | Cell division control protein 42 homolog                  | Cdc42    | 0.98±0.06 | 1.1±0.11  | 0.89 |
| C2_12428  | Cell growth regulator with EF hand domain protein 1       | CGREF1   | 1.27±0.11 | 0.93±0.03 | 1.36 |
| C2_2533   | Centromere protein V                                      | CENPV    | 1.77±0.28 | 1.5±0.08  | 1.18 |
| C2_39986  | Ceruloplasmin                                             | CP       | 0.77±0.08 | 0.76±0.08 | 1.02 |
| C2_19937  | C-factor                                                  | CSGA     | 1.11±0.06 | 0.45±0.02 | 2.48 |
| C2_12260  | cGMP-dependent protein kinase 2                           | PRKG1    | 1.06±0.07 | 1.57±0.34 | 0.68 |
| C2_3278   | Chitin synthase 1                                         | CHS1     | 0.83±0.1  | 0.98±0.11 | 0.84 |
| C2_45714  | Chloride intracellular channel protein 2                  | CLIC2    | 1.29±0.1  | 4.45±0.33 | 0.29 |
| C2_1437   | Chloride intracellular channel protein 4                  | CLIC4    | 1.27±0.2  | 2.76±0.07 | 0.46 |
| C2_7684   | Chloride intracellular channel protein 5                  | CLIC5    | 1.5±0.2   | 3.62±0.25 | 0.41 |
| C2_3135   | Cholesterol 24-hydroxylase                                | CYP46A1  | 1.18±0.09 | 0.69±0.05 | 1.72 |
| C2_5331   | Choline kinase alpha                                      | CHKA     | 0.81±0.12 | 0.21±0.01 | 3.86 |
| C2_6485   | Choline transporter-like protein 4                        | SLC44A4  | 1.56±0.22 | 3.4±0.2   | 0.46 |
| C2_7664   | Cholinesterase                                            | BCHE     | 0.73±0.1  | 0.55±0.02 | 1.34 |
| C2_19026  | Chromodomain-helicase-DNA-binding protein 1-like          | CHD1L    | 0.85±0.07 | 0.66±0.02 | 1.29 |
| C2_12123  | Chymotrypsin A                                            | CTRB1    | 0.62±0.15 | 0.36±0.06 | 1.74 |
| C2_4647   | Chymotrypsin B                                            | CTRB2    | 0.57±0.18 | 0.23±0.07 | 2.44 |
| C2_8139   | Chymotrypsin-C                                            | CTRC     | 0.56±0.17 | 0.27±0.05 | 2.10 |
| C2_16147  | Chymotrypsin-like elastase family member 1                | CELA1    | 0.69±0.11 | 0.48±0.03 | 1.43 |



|                  |                                                                      |          |           |            |      |
|------------------|----------------------------------------------------------------------|----------|-----------|------------|------|
| C2_9094          | Chymotrypsin-like elastase family member 2A                          | CELA2A   | 0.5±0.18  | 0.29±0.05  | 1.76 |
| C2_6507          | Chymotrypsin-like elastase family member 3B                          | CELA3B   | 0.56±0.17 | 0.33±0.07  | 1.73 |
| C2_4909          | Chymotrypsin-like protease CTRL-1                                    | CTRL     | 0.49±0.18 | 0.2±0.04   | 2.44 |
| C2_19864         | Cingulin                                                             | CGN      | 6.54±2.75 | 14.82±2.09 | 0.44 |
| C2_2740          | Citrate synthase, mitochondrial                                      | CS       | 0.93±0.04 | 0.3±0.03   | 3.08 |
| C2_121654        | Class I histocompatibility antigen, F10 alpha chain                  | HLA-A    | 1.03±0.07 | 0.63±0.05  | 1.63 |
| C2_18775         | Clathrin heavy chain 1                                               | CLTC     | 1.4±0.17  | 5.47±0.45  | 0.26 |
| C2_13187         | Clathrin heavy chain 1                                               | CLTC     | 1.03±0.03 | 2.84±0.26  | 0.36 |
| C2_49445         | Clathrin heavy chain 1                                               | CLTC     | 1.17±0.07 | 2.12±0.13  | 0.55 |
| C2_15910         | Clathrin heavy chain 1                                               | CLTC     | 1.56±0.22 | 2.25±0.16  | 0.70 |
| C2_19700         | Clathrin interactor 1                                                | CLINT1   | 1.06±0.04 | 1.67±0.08  | 0.64 |
| C2_1221          | Clathrin light chain A                                               | CLTA     | 1.29±0.33 | 1.27±0.27  | 1.01 |
| C2_14161         | Cleavage and polyadenylation specificity factor subunit 1            | CPSF1    | 0.7±0.11  | 0.43±0.08  | 1.64 |
| C2_1094          | Cleavage and polyadenylation specificity factor subunit 5            | NUDT21   | 1.38±0.17 | 1.4±0.03   | 0.99 |
| C3_c49530        | cleavage stimulation factor subunit 2-like [Oreochromis niloticus]   | CSTF2    | 1.87±0.48 | 1.44±0.41  | 1.30 |
| C2_25025         | Cleft lip and palate transmembrane protein 1-like protein            | CLPTM1L  | 3.81±1.1  | 2.07±0.33  | 1.84 |
| C2_76527         | Coactosin-like protein                                               | COTL1    | 1.03±0.11 | 2.25±0.51  | 0.46 |
| C2_28225         | Coagulation factor IX                                                | F9       | 0.89±0.05 | 0.91±0.2   | 0.98 |
| C2_17519         | Coagulation factor XI                                                | F11      | 1.33±0.12 | 1.14±0.09  | 1.16 |
| C2_66184         | Coatomer subunit alpha                                               | COPA     | 0.94±0.06 | 1.37±0.06  | 0.69 |
| C2_47987         | Coatomer subunit alpha                                               | COPA     | 1.61±0.34 | 1.67±0.14  | 0.97 |
| C2_5592          | Coatomer subunit alpha                                               | COPA     | 1.59±0.31 | 1.59±0.05  | 1.00 |
| C2_27574         | Coatomer subunit beta                                                | COPB1    | 1.41±0.21 | 2.01±0.26  | 0.70 |
| C2_4111          | Coatomer subunit beta                                                | COPB1    | 1.46±0.19 | 1.59±0.14  | 0.92 |
| C2_6399          | Coatomer subunit beta'                                               | COPB2    | 1.37±0.14 | 1.33±0.03  | 1.03 |
| C2_5687          | Coatomer subunit delta                                               | ARCN1    | 1.08±0.04 | 1.54±0.11  | 0.70 |
| C2_191           | Coatomer subunit epsilon                                             | COPE     | 1.26±0.19 | 1.27±0.05  | 0.99 |
| C2_3555          | Coatomer subunit gamma-2                                             | COPG2    | 1.02±0.04 | 0.99±0.08  | 1.03 |
| C2_157           | Coatomer subunit zeta-1                                              | COPZ1    | 0.82±0.1  | 0.98±0.08  | 0.84 |
| C2_120873        | Cocaine esterase                                                     | CE52     | 0.79±0.07 | 0.66±0.1   | 1.19 |
| C2_1192          | Cofilin-2                                                            | CFL2     | 1.32±0.19 | 4.32±1.07  | 0.31 |
| C2_3194          | Cohesin subunit SA-2                                                 | STAG2    | 1.1±0.18  | 1.13±0.1   | 0.98 |
| C2_7339          | Coiled-coil domain-containing protein 25                             | CCDC25   | 1.01±0    | 0.89±0.07  | 1.13 |
| C2_2941          | Coiled-coil domain-containing protein 56                             | FYCO1    | 0.79±0.16 | 0.32±0.06  | 2.46 |
| C2_64770         | Coiled-coil domain-containing protein 93                             | CCDC93   | 1.04±0.03 | 1.63±0.21  | 0.64 |
| C2_36566         | Cold-inducible RNA-binding protein A                                 | CIRBP    | 0.8±0.08  | 1.29±0.33  | 0.62 |
| C2_6346          | Collagen alpha-1(VIII) chain                                         | COL8A1   | 0.69±0.11 | 0.56±0.06  | 1.22 |
| C2_47133         | Collagen alpha-1(XII) chain                                          | COL12A1  | 0.76±0.1  | 1.22±0.56  | 0.63 |
| C2_54796         | Collagen alpha-2(VIII) chain                                         | COL8A2   | 0.99±0.05 | 1.05±0.14  | 0.94 |
| C2_9466          | Collagen alpha-3(VI) chain                                           | COL6A3   | 0.99±0.09 | 1.12±0.08  | 0.88 |
| C2_25181         | Collagen alpha-3(VI) chain                                           | COL6A3   | 0.95±0.06 | 1.05±0.07  | 0.91 |
| C2_18814         | Collagen alpha-3(VI) chain                                           | COL6A3   | 0.76±0.09 | 0.62±0.03  | 1.22 |
| C3_c35929        | Collagen alpha-3(VI) chain                                           | COL6A3   | 0.72±0.1  | 0.48±0.04  | 1.48 |
| C2_6735          | Collagen type IV alpha-3-binding protein                             | COL4A3BP | 1.12±0.09 | 1.07±0.07  | 1.04 |
| C2_15503         | Collectin-12                                                         | COLEC12  | 0.96±0.09 | 0.9±0.19   | 1.06 |
| C2_3111          | Collectrin                                                           | TMEM27   | 0.9±0.04  | 1.23±0.06  | 0.73 |
| C2_481           | COMM domain-containing protein 2                                     | COMMD2   | 1.04±0.02 | 1.85±0.32  | 0.56 |
| C2_1106          | COMM domain-containing protein 4                                     | COMMD4   | 0.88±0.04 | 1.4±0.18   | 0.63 |
| C2_6850          | COMM domain-containing protein 5                                     | COMMD5   | 1.1±0.06  | 1.46±0.09  | 0.75 |
| C2_1725          | COMM domain-containing protein 7                                     | COMMD7   | 1.07±0.04 | 1.34±0.08  | 0.80 |
| C2_9863          | COMM domain-containing protein 9                                     | COMMD9   | 0.92±0.05 | 1.27±0.09  | 0.73 |
| C2_2765          | Complement C1q tumor necrosis factor-related protein 3               | C1QTNF3  | 0.74±0.09 | 1.27±0.1   | 0.58 |
| C2_107825        | Complement C1q-like protein 2                                        | C1QL2    | 0.74±0.12 | 0.56±0.07  | 1.31 |
| C2_9268          | Complement C1q-like protein 4                                        | C1QL4    | 0.57±0.15 | 0.94±0.22  | 0.60 |
| C2_34468         | Complement C1r-A subcomponent                                        | C1R      | 0.89±0.06 | 0.73±0.05  | 1.22 |
| s_flp0005h11_f_1 | Complement C2                                                        | C2       | 1.31±0.38 | 3.14±0.49  | 0.42 |
| FP333165         | Complement C2                                                        | C2       | 1.09±0.06 | 1.21±0.06  | 0.89 |
| C2_1398          | Complement C3                                                        | C3       | 1.14±0.22 | 1.46±0.3   | 0.79 |
| C2_23904         | Complement C4-B                                                      | C4A/C4B  | 0.81±0.07 | 0.99±0.11  | 0.82 |
| C3_c8707         | Complement C5                                                        | C5       | 0.9±0.04  | 0.69±0.09  | 1.30 |
| C2_2762          | Complement component 1 Q subcomponent-binding protein, mitochondrial | C1QBP    | 1.27±0.23 | 0.83±0.09  | 1.53 |
| C2_2093          | Complement component C6                                              | C6       | 1.24±0.23 | 2.31±0.78  | 0.54 |
| C2_39232         | Complement component C7                                              | C7       | 0.97±0.01 | 0.78±0.12  | 1.25 |
| C2_26343         | Complement component C9                                              | C9       | 0.65±0.13 | 1.05±0.36  | 0.61 |
| C2_119654        | Complement decay-accelerating factor, GPI-anchored                   | CD55     | 1.6±0.28  | 1.6±0.26   | 1.00 |
| C2_9760          | Complement factor B                                                  | CFB      | 1.45±0.27 | 1.98±0.43  | 0.73 |

|                  |                                                         |           |           |           |      |
|------------------|---------------------------------------------------------|-----------|-----------|-----------|------|
| C2_121665        | Complement factor D                                     | CFD       | 1.14±0.06 | 1±0.1     | 1.14 |
| C2_2374          | Complement factor H                                     | CFH       | 1.06±0.1  | 1.2±0.12  | 0.88 |
| C2_8397          | Complement factor I                                     | CFI       | 0.86±0.08 | 0.86±0.02 | 1.00 |
| C2_1232          | COP9 signalosome complex subunit 1                      | GPS1      | 0.99±0.06 | 1.27±0.03 | 0.78 |
| C2_574           | COP9 signalosome complex subunit 2                      | Cops2     | 1.17±0.11 | 1.66±0.11 | 0.71 |
| C2_1948          | COP9 signalosome complex subunit 3                      | COPS3     | 1.15±0.06 | 1.36±0.11 | 0.84 |
| C2_100934        | COP9 signalosome complex subunit 4                      | COPS4     | 1.03±0.08 | 1.16±0.1  | 0.88 |
| C2_1203          | COP9 signalosome complex subunit 5                      | COPS5     | 1.16±0.08 | 1.55±0.01 | 0.75 |
| C2_3742          | COP9 signalosome complex subunit 6                      | COPS6     | 1.03±0.03 | 1.43±0.11 | 0.72 |
| C2_2034          | COP9 signalosome complex subunit 8                      | COPS8     | 1.13±0.08 | 1.34±0.27 | 0.84 |
| C2_2060          | Copine-1                                                | CPNE1     | 1.07±0.08 | 1.03±0.05 | 1.04 |
| C2_6548          | Copine-1                                                | CPNE1     | 1.01±0.09 | 0.67±0.05 | 1.51 |
| C2_2684          | Copine-3                                                | CPNE3     | 0.98±0.08 | 0.67±0.06 | 1.45 |
| C2_9214          | Copper chaperone for superoxide dismutase               | CCS       | 1.46±0.25 | 2.45±0.09 | 0.60 |
| C2_3222          | Copper homeostasis protein cutC homolog                 | CUTC      | 0.82±0.06 | 0.85±0.06 | 0.97 |
| C2_113919        | Copper transport protein ATOX1                          | ATOX1     | 1.27±0.21 | 4.76±0.65 | 0.27 |
| C2_2051          | Coproporphyrinogen-III oxidase, mitochondrial           | CPOX      | 1.01±0.12 | 0.66±0.08 | 1.52 |
| C2_451           | Coronin-1A                                              | CORO1A    | 1.07±0.06 | 1.05±0.08 | 1.01 |
| C2_5573          | Coronin-7                                               | CORO7     | 1.06±0.1  | 1.76±0.16 | 0.60 |
| C2_2727          | Costars family protein C6orf115 homolog                 | C6orf115  | 1.14±0.12 | 2.19±0.14 | 0.52 |
| C2_12148         | Coxsackievirus and adenovirus receptor homolog          | CXADR     | 0.84±0.06 | 1.02±0.1  | 0.82 |
| C2_690           | Creatine kinase B-type                                  | CKB       | 1.08±0.03 | 0.9±0.07  | 1.20 |
| C2_27            | Creatine kinase M-type                                  | CKM       | 1.15±0.09 | 1.38±0.15 | 0.83 |
| C2_2465          | Creatine kinase S-type, mitochondrial                   | CKMT2     | 0.99±0.1  | 0.41±0.09 | 2.43 |
| C2_24223         | Creatine kinase U-type, mitochondrial                   | CKMT1A    | 0.88±0.13 | 0.66±0.06 | 1.33 |
| C2_29254         | Crk-like protein                                        | CRKL      | 0.6±0.14  | 0.44±0.06 | 1.36 |
| C2_1078          | Crystallin J1C                                          | CJ1C      | 1.01±0.07 | 1.06±0.17 | 0.96 |
| C2_13761         | Cubilin                                                 | CUBN      | 0.7±0.11  | 1.69±0.43 | 0.42 |
| C2_24989         | Cubilin                                                 | CUBN      | 0.97±0.11 | 1.43±0.34 | 0.68 |
| C2_7016          | CUGBP Elav-like family member 2                         | CELF2     | 0.85±0.06 | 0.87±0.07 | 0.98 |
| C2_4406          | Cullin 3                                                | CUL3      | 1.16±0.06 | 0.45±0.02 | 2.61 |
| C2_13502         | Cullin 5                                                | CUL5      | 1.08±0.11 | 2.11±0.43 | 0.51 |
| C2_16199         | Cullin-1                                                | CUL1      | 1.06±0.05 | 1.42±0.16 | 0.75 |
| C2_23133         | Cyclin-G-associated kinase                              | GAK       | 0.63±0.16 | 0.51±0.03 | 1.25 |
| C2_1820          | Cystathionine beta-synthase                             | CBS       | 1.35±0.18 | 0.84±0.07 | 1.60 |
| C2_2620          | Cystathionine gamma-lyase                               | CTH       | 1.36±0.15 | 0.63±0.05 | 2.17 |
| C2_6753          | Cystatin                                                | CST1      | 1.06±0.08 | 1.64±0.3  | 0.65 |
| C2_617           | Cystatin-B                                              | CSTB      | 0.93±0.03 | 1.94±0.17 | 0.48 |
| C2_483           | Cysteine dioxygenase type 1                             | CDO1      | 1.05±0.06 | 0.86±0.06 | 1.22 |
| C2_2752          | Cysteine protease ATG4B                                 | ATG4B     | 0.85±0.06 | 0.91±0.02 | 0.93 |
| C2_9620          | Cysteine sulfinic acid decarboxylase                    | CSAD      | 1.08±0.07 | 0.81±0.04 | 1.33 |
| C2_42628         | Cysteine-rich protein 1                                 | CRIP1     | 2.54±0.72 | 4.13±0.37 | 0.62 |
| C2_4479          | Cysteinyl-tRNA synthetase, cytoplasmic                  | CARS      | 1.71±0.25 | 1.65±0.02 | 1.04 |
| C2_34558         | Cytidine and dCMP deaminase domain-containing protein 1 | CDADC1    | 1±0.27    | 0.66±0.05 | 1.52 |
| C2_12715         | Cytochrome b5                                           | CYB5A     | 0.78±0.11 | 0.21±0.02 | 3.78 |
| C2_71561         | Cytochrome b5 type B                                    | CYB5B     | 1.05±0.09 | 0.61±0.04 | 1.72 |
| C2_2189          | Cytochrome c                                            | LOC690675 | 0.98±0.12 | 0.84±0.11 | 1.17 |
| C2_80            | Cytochrome c oxidase subunit 2                          | MT-CO2    | 1.07±0.19 | 0.22±0.03 | 4.88 |
| C2_462           | Cytochrome c oxidase subunit 4 isoform 2, mitochondria  | COX4I2    | 1.17±0.2  | 0.48±0.07 | 2.44 |
| C2_785           | Cytochrome c1, heme protein, mitochondrial              | CYC1      | 2.69±0.96 | 0.77±0.04 | 3.51 |
| C2_46314         | Cytochrome c-b                                          | CYCB      | 0.83±0.12 | 0.31±0.04 | 2.71 |
| C2_7108          | Cytochrome P450 20A1                                    | CYP20A1   | 1.67±0.32 | 1.71±0.28 | 0.98 |
| C2_36102         | Cytochrome P450 2C23                                    | Cyp2c44   | 1.03±0.07 | 1.12±0.31 | 0.92 |
| C2_13986         | Cytochrome P450 2D26                                    | Cyp2d26   | 0.89±0.1  | 0.35±0.03 | 2.53 |
| C2_4087          | Cytochrome P450 2J2                                     | CYP2J2    | 1.1±0.08  | 0.93±0.06 | 1.18 |
| C2_4431          | Cytochrome P450 2K1                                     | CYP2K1    | 1.24±0.13 | 0.83±0.09 | 1.49 |
| C2_90622         | Cytochrome P450 2K3                                     | CYP2K3    | 0.89±0.13 | 0.59±0.05 | 1.52 |
| C2_57426         | Cytochrome P450 2K3                                     | CYP2K3    | 1.34±0.19 | 0.52±0.04 | 2.59 |
| C2_2493          | Cytochrome P450 3A40                                    | CYP3A40   | 1.45±0.18 | 0.92±0.02 | 1.59 |
| C2_10704         | Cytoglobin-1                                            | CYGB1     | 1.01±0.02 | 2.14±0.11 | 0.47 |
| s_flp0006b09_f_1 | Cytoplasmic aconitase hydratase                         | ACO1      | 1.28±0.1  | 2.18±0.5  | 0.59 |
| FP333392         | Cytoplasmic aconitase hydratase                         | ACO1      | 1.31±0.17 | 1.81±0.47 | 0.73 |
| C2_68872         | Cytoplasmic aconitase hydratase                         | ACO1      | 1.21±0.1  | 1.43±0.05 | 0.85 |
| C2_2851          | Cytoplasmic aconitase hydratase                         | ACO1      | 1.32±0.11 | 1.34±0.05 | 0.98 |
| C2_49271         | Cytoplasmic dynein 1 heavy chain 1                      | DYNC1H1   | 0.83±0.06 | 1.85±0.5  | 0.45 |
| C2_39955         | Cytoplasmic dynein 1 heavy chain 1                      | DYNC1H1   | 1.11±0.12 | 1.74±0.48 | 0.64 |
| C2_50878         | Cytoplasmic dynein 1 heavy chain 1                      | DYNC1H1   | 1.44±0.24 | 1.96±0.23 | 0.73 |

|          |                                                                                                                  |          |           |           |      |
|----------|------------------------------------------------------------------------------------------------------------------|----------|-----------|-----------|------|
| C2_5034  | Cytoplasmic dynein 1 heavy chain 1                                                                               | DYNC1H1  | 1.05±0.07 | 1.42±0.23 | 0.74 |
| C2_16351 | Cytoplasmic dynein 1 heavy chain 1                                                                               | DYNC1H1  | 1.3±0.18  | 1.58±0.36 | 0.83 |
| C2_82382 | Cytoplasmic dynein 1 heavy chain 1                                                                               | DYNC1H1  | 1.02±0.1  | 1.23±0.19 | 0.83 |
| C2_96734 | Cytoplasmic dynein 1 heavy chain 1                                                                               | DYNC1H1  | 1.45±0.16 | 1.7±0.25  | 0.85 |
| C2_7060  | Cytoplasmic dynein 1 intermediate chain 2                                                                        | Dync1i2  | 0.92±0.06 | 1.42±0.11 | 0.64 |
| C2_2521  | Cytoplasmic dynein 1 light intermediate chain 2                                                                  | DYNC1LI2 | 1.11±0.07 | 0.95±0.31 | 1.17 |
| C2_21796 | Cytoplasmic FMR1-interacting protein 1 homolog                                                                   | CYFIP1   | 1.56±0.26 | 2.65±0.43 | 0.59 |
| C2_11304 | Cytoplasmic FMR1-interacting protein 1 homolog                                                                   | CYFIP1   | 1.3±0.45  | 1.47±0.28 | 0.89 |
| C2_12482 | Cytoskeleton-associated protein 5                                                                                | CKAP5    | 0.97±0.07 | 1.11±0.15 | 0.88 |
| C2_7146  | Cytosol aminopeptidase                                                                                           | LAP3     | 0.89±0.05 | 0.45±0.04 | 1.98 |
| C2_13504 | Cytosolic 5'-nucleotidase 1B                                                                                     | NT5C1B   | 2.49±0.81 | 1.44±0.37 | 1.73 |
| C2_12507 | Cytosolic 5'-nucleotidase 3                                                                                      | NT5C3A   | 0.89±0.07 | 0.98±0.06 | 0.91 |
| C2_3501  | Cytosolic Fe-S cluster assembly factor narfl                                                                     | NARFL    | 1±0.05    | 1.02±0.03 | 0.98 |
| C2_928   | Cytosolic non-specific dipeptidase                                                                               | CNDP2    | 1.36±0.12 | 2.07±0.15 | 0.66 |
| C2_10502 | Cytosolic phospholipase A2 gamma                                                                                 | PLA2G4C  | 1.94±0.47 | 3.96±0.42 | 0.49 |
| C2_32889 | Cytosolic phospholipase A2 gamma                                                                                 | PLA2G4C  | 1.22±0.21 | 2.16±0.12 | 0.56 |
| C2_5757  | Cytosolic purine 5'-nucleotidase                                                                                 | NT5C2    | 0.84±0.09 | 0.32±0.03 | 2.60 |
| C2_70910 | Cytosolic sulfotransferase 1                                                                                     | SULT1A1  | 1.04±0.05 | 1.93±0.37 | 0.54 |
| C2_528   | Cytosolic sulfotransferase 2                                                                                     | SULT1A1  | 1.01±0.04 | 2.57±0.63 | 0.39 |
| C2_2270  | Cytosolic sulfotransferase 3                                                                                     | SULT1A1  | 1.09±0.12 | 3.56±0.61 | 0.31 |
| C2_31660 | D-2-hydroxyglutarate dehydrogenase, mitochondrial                                                                | D2HGDH   | 1.33±0.16 | 0.71±0.04 | 1.88 |
| C2_7372  | D-amino-acid oxidase                                                                                             | DAO      | 1.85±0.34 | 0.78±0.04 | 2.37 |
| C2_2631  | DCN1-like protein 2                                                                                              | DCUN1D2  | 1.1±0.11  | 1.57±0.13 | 0.70 |
| C2_1763  | D-dopachrome decarboxylase                                                                                       | DDT      | 0.92±0.05 | 1.2±0.11  | 0.77 |
| C2_5628  | DDRKG domain-containing protein 1                                                                                | DDRKG1   | 1.03±0.05 | 1.89±0.3  | 0.54 |
| C2_3999  | Dehydrogenase/reductase SDR family member 1                                                                      | DHRS1    | 1.35±0.21 | 0.85±0.09 | 1.58 |
| C2_34491 | Dehydrogenase/reductase SDR family member 11                                                                     | DHRS11   | 0.83±0.12 | 0.58±0.06 | 1.44 |
| C2_35778 | Dehydrogenase/reductase SDR family member 12                                                                     | DHRS12   | 1.37±0.14 | 1.18±0.1  | 1.16 |
| C2_5726  | Dehydrogenase/reductase SDR family member 13                                                                     | DHRS13   | 1.19±0.15 | 0.54±0.02 | 2.21 |
| C2_9536  | Deleted in malignant brain tumors 1 protein                                                                      | DMBT1    | 0.69±0.15 | 0.33±0.08 | 2.07 |
| C2_12746 | Delta(24)-sterol reductase                                                                                       | DHCR24   | 0.96±0.08 | 0.51±0.05 | 1.88 |
| C2_17169 | Delta-aminolevulinic acid dehydratase                                                                            | ALAD     | 0.74±0.09 | 0.62±0.04 | 1.20 |
| C2_734   | DENN domain-containing protein 2D                                                                                | DENND2D  | 0.82±0.08 | 0.78±0.12 | 1.05 |
| C2_94566 | Deoxyribonuclease-1                                                                                              | DNASE1   | 0.56±0.16 | 0.28±0.05 | 1.99 |
| C2_19553 | Deoxyribonuclease-2-alpha                                                                                        | DNASE2   | 1.38±0.36 | 0.95±0.05 | 1.46 |
| C2_14136 | Desmocollin-2                                                                                                    | DSC2     | 0.92±0.05 | 0.84±0.08 | 1.10 |
| C2_17928 | Desmoplakin                                                                                                      | DSP      | 0.86±0.05 | 1.15±0.17 | 0.75 |
| C2_20476 | Desmoplakin                                                                                                      | DSP      | 1.19±0.09 | 1±0.07    | 1.19 |
| C2_521   | Diablo homolog, mitochondrial                                                                                    | DIABLO   | 1.3±0.21  | 2.32±0.21 | 0.56 |
| C2_71353 | Diacylglycerol kinase beta                                                                                       | DGKB     | 1.29±0.16 | 0.67±0.02 | 1.93 |
| C2_14569 | Diamine acetyltransferase 2                                                                                      | SAT2     | 0.94±0.04 | 0.71±0.02 | 1.31 |
| C2_5593  | Dihydrolipoyl dehydrogenase, mitochondrial                                                                       | DLD      | 1.27±0.25 | 0.45±0.05 | 2.83 |
| C2_11248 | Dihydrolipoyllysine-residue acetyltransferase component of pyruvate dehydrogenase complex, mitochondrial         | DLAT     | 1.45±0.29 | 0.69±0.03 | 2.10 |
| C2_9692  | Dihydrolipoyllysine-residue succinyltransferase component of 2-oxoglutarate dehydrogenase complex, mitochondrial | DLST     | 1.67±0.3  | 1.28±0.08 | 1.31 |
| C2_51666 | Dihydropyrimidinase                                                                                              | DPYS     | 0.78±0.11 | 0.46±0.03 | 1.72 |
| C2_9224  | Dimethylaniline monooxygenase [N-oxide-forming] 5                                                                | FMO5     | 1.45±0.21 | 0.63±0.01 | 2.30 |
| C2_192   | Dipeptidase 1                                                                                                    | DPEP1    | 0.53±0.16 | 0.49±0.07 | 1.07 |
| C2_366   | Dipeptidyl peptidase 1                                                                                           | CTSC     | 0.83±0.14 | 0.46±0.1  | 1.80 |
| C2_7138  | Dipeptidyl peptidase 2                                                                                           | DPP7     | 0.74±0.11 | 0.5±0.03  | 1.48 |
| C2_40681 | Dipeptidyl peptidase 3                                                                                           | DPP3     | 0.96±0.09 | 0.7±0.06  | 1.38 |
| C2_46432 | Dipeptidyl peptidase 3                                                                                           | DPP3     | 0.9±0.13  | 0.58±0.06 | 1.56 |
| C2_14794 | Dipeptidyl peptidase 3                                                                                           | DPP3     | 0.96±0.14 | 0.55±0.06 | 1.75 |
| C2_1242  | Dipeptidyl peptidase 4                                                                                           | DPP4     | 0.69±0.14 | 0.45±0.07 | 1.53 |
| C2_6203  | Dipeptidyl peptidase 9                                                                                           | DPP9     | 1.03±0.04 | 1.24±0.18 | 0.84 |
| C2_6030  | Diphosphoinositol polyphosphate phosphohydrolase 1                                                               | NUDT3    | 1.17±0.16 | 2.37±0.18 | 0.50 |
| C2_7518  | Diphosphomevalonate decarboxylase                                                                                | MVD      | 1.72±0.28 | 0.63±0.04 | 2.72 |
| C2_32972 | DIS3-like exonuclease 2                                                                                          | DIS3L2   | 1.08±0.03 | 0.99±0.1  | 1.09 |
| C2_4400  | Disabled homolog 2                                                                                               | DAB2     | 0.97±0.05 | 2.45±0.93 | 0.40 |
| C2_15082 | DmX-like protein 1                                                                                               | DMXL1    | 1.01±0.04 | 1.43±0.11 | 0.71 |
| C2_20797 | DNA damage-binding protein 1                                                                                     | DDB1     | 1.22±0.07 | 1.03±0.04 | 1.19 |
| C2_54730 | DNA damage-binding protein 1                                                                                     | DDB1     | 1.1±0.15  | 0.88±0.06 | 1.25 |
| C2_15432 | DNA damage-binding protein 1                                                                                     | DDB1     | 1.33±0.14 | 1.01±0.06 | 1.32 |
| C2_2773  | DNA polymerase beta                                                                                              | POLB     | 1.07±0.05 | 0.82±0.06 | 1.31 |
| C2_17016 | DNA topoisomerase 2-beta                                                                                         | TOP2B    | 0.83±0.07 | 0.99±0.17 | 0.84 |
| C2_2056  | DNA-(apurinic or apyrimidinic site) lyase                                                                        | APEX1    | 0.92±0.03 | 0.99±0.06 | 0.93 |

|           |                                                                                    |         |           |           |      |
|-----------|------------------------------------------------------------------------------------|---------|-----------|-----------|------|
| C2_937    | DnaJ homolog subfamily A member 2                                                  | DNAJA2  | 1.04±0.11 | 1.77±0.07 | 0.59 |
| C2_4033   | DnaJ homolog subfamily A member 2                                                  | DNAJA2  | 1.5±0.3   | 2.54±0.1  | 0.59 |
| C2_7667   | DnaJ homolog subfamily C member 13                                                 | DNAJC13 | 0.9±0.06  | 1.62±0.31 | 0.55 |
| C2_1240   | Dolichyl-diphosphooligosaccharide--protein glycosyltransferase 48 kDa subunit      | DDOST   | 1.45±0.18 | 0.81±0.05 | 1.79 |
| C2_37060  | Dolichyl-diphosphooligosaccharide--protein glycosyltransferase subunit 1           | RPN1    | 1.5±0.18  | 1.07±0.09 | 1.40 |
| C2_3023   | Dolichyl-diphosphooligosaccharide--protein glycosyltransferase subunit 1           | RPN1    | 1.92±0.32 | 1.09±0.05 | 1.76 |
| C2_1591   | Dolichyl-diphosphooligosaccharide--protein glycosyltransferase subunit 2           | RPN2    | 1.35±0.17 | 0.78±0.04 | 1.72 |
| C2_26319  | Dolichyl-diphosphooligosaccharide--protein glycosyltransferase subunit DAD1        | DAD1    | 1.77±0.34 | 1.45±0.3  | 1.23 |
| C2_1500   | Dolichyl-diphosphooligosaccharide--protein glycosyltransferase subunit STT3A       | STT3A   | 1.39±0.16 | 0.98±0.05 | 1.42 |
| C2_8403   | Drebrin-like protein B                                                             | DBN1    | 0.95±0.14 | 1.32±0.1  | 0.72 |
| C2_10485  | D-serine dehydratase                                                               | SRR     | 1.12±0.08 | 1.23±0.04 | 0.91 |
| C2_6083   | D-serine dehydratase                                                               | SRR     | 1.15±0.12 | 1.26±0.1  | 0.92 |
| C2_9271   | Dual specificity mitogen-activated protein kinase kinase 2                         | MAP2K2  | 0.77±0.1  | 0.95±0.32 | 0.81 |
| C2_1808   | Dual specificity protein phosphatase 23                                            | DUSP23  | 1.28±0.22 | 3.04±0.5  | 0.42 |
| C2_58934  | Dynactin subunit 1                                                                 | DCTN1   | 1.41±0.19 | 1.93±0.08 | 0.73 |
| C2_3714   | Dynactin subunit 1                                                                 | DCTN1   | 0.69±0.11 | 0.7±0.08  | 0.99 |
| C2_10012  | Dynactin subunit 2                                                                 | DCTN2   | 0.9±0.08  | 1.15±0.09 | 0.79 |
| C2_64914  | Dynactin subunit 3                                                                 | DCTN3   | 1.17±0.08 | 2.5±0.13  | 0.47 |
| C2_1825   | Dynactin subunit 4                                                                 | DCTN4   | 0.96±0.04 | 0.96±0.03 | 1.00 |
| C2_3772   | Dynamin-1-like protein                                                             | DNM1L   | 1.36±0.15 | 1.35±0.17 | 1.00 |
| C2_6275   | Dynamin-2                                                                          | DNM2    | 1.33±0.12 | 2.78±0.61 | 0.48 |
| C2_27580  | Dynein light chain 2, cytoplasmic                                                  | DYNLL2  | 0.97±0.03 | 1.14±0.1  | 0.85 |
| C2_121099 | Dynein light chain roadblock-type 1                                                | DYNLRB1 | 0.87±0.05 | 0.84±0.1  | 1.03 |
| C2_26538  | Dynein light chain Tctex-type 3                                                    | DYNLT3  | 1.08±0.04 | 0.91±0.08 | 1.18 |
| C2_27865  | E3 SUMO-protein ligase RanBP2                                                      | RGPD4   | 0.69±0.12 | 0.54±0.06 | 1.27 |
| C2_7646   | E3 ubiquitin-protein ligase CBL-B                                                  | CBLB    | 3.04±1    | 4.32±0.32 | 0.70 |
| C2_62994  | E3 ubiquitin-protein ligase HECTD1                                                 | HECTD1  | 1.09±0.1  | 1.22±0.25 | 0.89 |
| C2_9198   | E3 ubiquitin-protein ligase HECTD3                                                 | HECTD3  | 0.96±0.02 | 1.35±0.1  | 0.71 |
| C2_18708  | E3 ubiquitin-protein ligase HUWE1                                                  | HUWE1   | 0.85±0.06 | 1.41±0.31 | 0.61 |
| C2_14467  | E3 ubiquitin-protein ligase HUWE1                                                  | HUWE1   | 1.48±0.18 | 2.24±0.25 | 0.66 |
| C2_73398  | E3 ubiquitin-protein ligase HUWE1                                                  | HUWE1   | 1.2±0.14  | 1.72±0.12 | 0.70 |
| C2_1338   | E3 ubiquitin-protein ligase HUWE1                                                  | HUWE1   | 1.03±0.05 | 0.88±0.07 | 1.17 |
| C2_14877  | E3 ubiquitin-protein ligase NEDD4-like                                             | NEDD4L  | 1.38±0.2  | 2.4±0.16  | 0.57 |
| C2_5763   | E3 ubiquitin-protein ligase NEDD4-like                                             | NEDD4L  | 1.14±0.13 | 1.86±0.09 | 0.62 |
| C2_2829   | E3 ubiquitin-protein ligase UBR4                                                   | UBR4    | 1.01±0.03 | 1.27±0.04 | 0.80 |
| C2_65482  | E3 ubiquitin-protein ligase UBR4                                                   | UBR4    | 1.17±0.11 | 1.41±0.31 | 0.83 |
| C2_4136   | Echinoderm microtubule-associated protein-like 1                                   | EML1    | 1.52±0.23 | 1.95±0.19 | 0.78 |
| C2_5005   | Echinoderm microtubule-associated protein-like 3                                   | EML3    | 0.97±0.06 | 1.19±0.1  | 0.81 |
| C3_c45339 | echinoderm microtubule-associated protein-like 4-like isoform X1 [Maylandia zebra] | EML4    | 0.94±0.1  | 0.69±0.07 | 1.36 |
| C2_43246  | Ecto-NOX disulfide-thiol exchanger 2                                               | ENOX2   | 3.5±1.24  | 0.54±0.08 | 6.49 |
| FM150650  | Ectonucleotide pyrophosphatase/phosphodiesterase family member 2                   | ENPP2   | 1.17±0.14 | 1.51±0.26 | 0.77 |
| C3_c55223 | Ectonucleotide pyrophosphatase/phosphodiesterase family member 2                   | ENPP2   | 0.87±0.04 | 0.98±0.1  | 0.89 |
| C2_29850  | Ectonucleotide pyrophosphatase/phosphodiesterase family member 3                   | ENPP3   | 0.67±0.12 | 0.38±0.04 | 1.74 |
| C2_53228  | Ectonucleotide pyrophosphatase/phosphodiesterase family member 3                   | ENPP3   | 0.67±0.14 | 0.29±0.02 | 2.33 |
| C2_2589   | Ectonucleotide pyrophosphatase/phosphodiesterase family member 6                   | ENPP6   | 0.6±0.14  | 0.52±0.05 | 1.15 |
| C2_8279   | Ectonucleotide pyrophosphatase/phosphodiesterase family member 7                   | ENPP7   | 0.75±0.13 | 0.47±0.04 | 1.61 |
| C2_8820   | EF-hand domain-containing protein D2                                               | EFHD2   | 0.82±0.06 | 0.68±0.07 | 1.20 |
| C2_2191   | Egl nine homolog 1                                                                 | EGLN1   | 0.8±0.09  | 1±0.14    | 0.81 |
| C2_25319  | EH domain-containing protein 1                                                     | EHD1    | 1.06±0.07 | 3.14±1    | 0.34 |
| C2_20763  | EH domain-containing protein 1                                                     | EHD1    | 0.9±0.05  | 2.43±0.77 | 0.37 |
| C3_c44941 | EH domain-containing protein 3                                                     | EHD3    | 1.29±0.16 | 2.87±0.46 | 0.45 |
| C2_4289   | Elastase-1                                                                         | CELA1   | 0.61±0.18 | 0.29±0.06 | 2.09 |
| C2_41087  | Electrogenic sodium bicarbonate cotransporter 1                                    | SLC4A4  | 1.91±0.37 | 0.84±0.12 | 2.29 |
| C2_127    | Electron transfer flavoprotein subunit alpha, mitochondrial                        | ETFa    | 1.13±0.19 | 0.71±0.14 | 1.59 |

|           |                                                                    |          |           |           |      |
|-----------|--------------------------------------------------------------------|----------|-----------|-----------|------|
| C2_18     | Elongation factor 1-alpha                                          | EEF1A    | 1.61±0.29 | 2.35±1.01 | 0.69 |
| C2_344    | Elongation factor 1-beta                                           | EEF1B2   | 1.38±0.16 | 2.67±0.55 | 0.52 |
| C2_25907  | Elongation factor 1-delta                                          | EEF1D    | 1.39±0.13 | 1.36±0.03 | 1.03 |
| C2_55     | Elongation factor 1-gamma                                          | EEF1G    | 1.66±0.31 | 2.44±0.17 | 0.68 |
| C2_534    | Elongation factor 2                                                | EEF2     | 1.76±0.34 | 2.28±0.11 | 0.77 |
| C2_43870  | Elongation of very long chain fatty acids protein 6                | ELOVL6   | 1.27±0.3  | 0.54±0.06 | 2.36 |
| C2_5617   | Endonuclease domain-containing 1 protein                           | ENDOD1   | 0.69±0.11 | 0.52±0.1  | 1.31 |
| C2_4183   | Endophilin-B1                                                      | SH3GLB1  | 0.76±0.09 | 0.96±0.09 | 0.79 |
| C2_11409  | Endoplasmic reticulum aminopeptidase 1                             | ERAP1    | 0.97±0.02 | 0.84±0.04 | 1.15 |
| C2_21873  | Endoplasmic reticulum aminopeptidase 2                             | ERAP2    | 1.01±0.05 | 0.97±0.17 | 1.05 |
| C2_26383  | Endoplasmic reticulum metalloproteinase 1                          | ERMP1    | 0.8±0.1   | 0.73±0.07 | 1.10 |
| C2_15688  | Endoplasmic reticulum resident protein 27                          | ERP27    | 1.07±0.04 | 1.38±0.11 | 0.78 |
| C2_21801  | Endoplasmic reticulum resident protein 44                          | ERP44    | 1.01±0.09 | 0.43±0.03 | 2.35 |
| C2_1490   | Endoplasmic reticulum chaperone protein 70                         | HSP90B1  | 1.27±0.12 | 1.43±0.04 | 0.89 |
| C2_54975  | Enhancer of mRNA-decapping protein 4                               | EDC4     | 1.11±0.16 | 1.32±0.07 | 0.84 |
| C2_8738   | Enhancer of mRNA-decapping protein 4                               | EDC4     | 0.84±0.06 | 0.94±0.07 | 0.90 |
| C2_71750  | Enhancer of mRNA-decapping protein 4                               | EDC4     | 0.78±0.09 | 0.79±0.06 | 0.99 |
| C2_6952   | Enhancer of rudimentary homolog                                    | ERH      | 0.81±0.09 | 1.03±0.09 | 0.79 |
| C2_13119  | Enolase                                                            | ENO3     | 1±0.11    | 1.31±0.08 | 0.76 |
| C2_5154   | Enoyl-CoA delta isomerase 1, mitochondrial                         | ECI1     | 1.32±0.12 | 1.1±0.07  | 1.20 |
| C2_64284  | Enoyl-CoA hydratase domain-containing protein 2, mitochondrial     | ECHDC2   | 1.26±0.1  | 1.12±0.05 | 1.13 |
| C2_3722   | Enoyl-CoA hydratase, mitochondrial                                 | ECHS1    | 1.29±0.1  | 1.01±0.03 | 1.28 |
| C2_81191  | Enteropeptidase                                                    | TMPRSS15 | 0.68±0.15 | 0.28±0.07 | 2.41 |
| C2_646    | Eosinophil peroxidase                                              | EPX      | 0.47±0.18 | 0.68±0.21 | 0.68 |
| C2_118    | Ependymin                                                          | EPD      | 0.69±0.15 | 0.34±0.03 | 2.01 |
| C2_117429 | Ependymin-2                                                        | EPD2     | 0.71±0.18 | 0.6±0.05  | 1.19 |
| C2_14283  | Epidermal growth factor receptor kinase substrate 8-like protein 2 | EPS8L2   | 1.57±0.31 | 2.26±0.23 | 0.70 |
| C2_5498   | Epidermal growth factor receptor kinase substrate 8-like protein 3 | EPS8L3   | 1.2±0.12  | 1.94±0.04 | 0.62 |
| C2_782    | Epididymal secretory protein E1                                    | NPC2     | 0.73±0.16 | 0.4±0.06  | 1.85 |
| C2_20845  | Epiplakin                                                          | EPPK1    | 1.21±0.15 | 0.62±0.06 | 1.95 |
| C2_80116  | Epiplakin                                                          | EPPK1    | 1.47±0.28 | 0.46±0.01 | 3.17 |
| C2_6684   | Epoxide hydrolase 1                                                | EPHX1    | 1.24±0.23 | 0.36±0.02 | 3.44 |
| C2_22855  | Epoxide hydrolase 2                                                | EPHX2    | 1.34±0.15 | 1.03±0.06 | 1.29 |
| C2_34000  | ER degradation-enhancing alpha-mannosidase-like 3                  | EDEM3    | 1.01±0.13 | 0.63±0.02 | 1.61 |
| C2_5519   | ER lumen protein retaining receptor 2                              | KDEL2    | 1.07±0.19 | 0.41±0.08 | 2.60 |
| C2_12878  | Erlin-1                                                            | ERLIN1   | 1.27±0.12 | 1±0.09    | 1.27 |
| C2_16588  | Erlin-2                                                            | ERLIN2   | 1.13±0.11 | 0.4±0.01  | 2.84 |
| C2_6918   | ERO1-like protein alpha                                            | ERO1L    | 0.98±0.07 | 1.44±0.18 | 0.68 |
| C2_1732   | Erythrocyte band 7 integral membrane protein                       | STOM     | 0.86±0.11 | 0.44±0.05 | 1.94 |
| C2_800    | ES1 protein homolog, mitochondrial                                 | C21orf33 | 0.86±0.05 | 0.72±0.03 | 1.19 |
| C2_4860   | Ester hydrolase C11orf54 homolog                                   | C11orf54 | 0.79±0.08 | 1.39±0.1  | 0.57 |
| C2_12674  | Estradiol 17-beta-dehydrogenase 12-B                               | HSD17B12 | 1.39±0.14 | 0.8±0.04  | 1.75 |
| C2_3321   | Ethanolamine-phosphate cytidylyltransferase                        | PCYT2    | 1.08±0.04 | 0.96±0.09 | 1.12 |
| C2_406    | Eukaryotic initiation factor 4A-I                                  | EIF4A1   | 1.18±0.08 | 2.24±0.23 | 0.53 |
| C2_746    | Eukaryotic initiation factor 4A-II                                 | EIF4A2   | 1.33±0.15 | 1.83±0.03 | 0.73 |
| C2_1414   | Eukaryotic initiation factor 4A-III                                | EIF4A3   | 1.15±0.06 | 1.19±0.11 | 0.97 |
| C2_3344   | Eukaryotic peptide chain release factor GTP-binding subunit ERF3A  | GSPT1    | 0.78±0.09 | 1.03±0.28 | 0.76 |
| C2_569    | Eukaryotic peptide chain release factor subunit 1                  | ETF1     | 0.53±0.16 | 0.5±0.02  | 1.05 |
| C2_3415   | Eukaryotic translation elongation factor 1 epsilon-1               | EEF1E1   | 1.09±0.08 | 2.7±0.17  | 0.40 |
| C2_4011   | Eukaryotic translation initiation factor 2 subunit 1               | EIF2S1   | 1.28±0.13 | 1.53±0.05 | 0.84 |
| C2_5966   | Eukaryotic translation initiation factor 2 subunit 2               | EIF2S2   | 1.03±0.05 | 1.68±0.07 | 0.61 |
| C2_1614   | Eukaryotic translation initiation factor 2 subunit 3               | EIF2S3   | 1.23±0.09 | 1.59±0.06 | 0.77 |
| C2_47079  | Eukaryotic translation initiation factor 2A                        | EIF2A    | 1.19±0.07 | 0.87±0.06 | 1.36 |
| C2_533    | Eukaryotic translation initiation factor 3 subunit A               | EIF3A    | 0.93±0.04 | 1.14±0.14 | 0.82 |
| C2_630    | Eukaryotic translation initiation factor 3 subunit B               | EIF3B    | 1.13±0.05 | 1.02±0.08 | 1.11 |
| C2_3032   | Eukaryotic translation initiation factor 3 subunit C               | EIF3C    | 2.44±0.66 | 4.69±0.34 | 0.52 |
| C2_67438  | Eukaryotic translation initiation factor 3 subunit C               | EIF3C    | 1.07±0.03 | 1.16±0.02 | 0.92 |
| C2_541    | Eukaryotic translation initiation factor 3 subunit D               | EIF3D    | 1.49±0.24 | 1.64±0.07 | 0.90 |
| C2_114    | Eukaryotic translation initiation factor 3 subunit E               | EIF3E    | 0.96±0.06 | 1.62±0.42 | 0.59 |
| C2_92     | Eukaryotic translation initiation factor 3 subunit F               | EIF3F    | 0.82±0.07 | 1.24±0.22 | 0.66 |
| C2_1542   | Eukaryotic translation initiation factor 3 subunit G               | EIF3G    | 2.05±0.62 | 2.94±0.13 | 0.70 |
| C2_413    | Eukaryotic translation initiation factor 3 subunit H               | EIF3H    | 0.89±0.09 | 1.45±0.25 | 0.61 |
| C2_312    | Eukaryotic translation initiation factor 3 subunit I               | EIF3I    | 1.19±0.13 | 1.23±0.04 | 0.97 |
| C2_19263  | Eukaryotic translation initiation factor 3 subunit J-A             | EIF3J    | 1.03±0.05 | 0.99±0.02 | 1.04 |
| C2_5501   | Eukaryotic translation initiation factor 3 subunit K               | EIF3K    | 0.82±0.08 | 1.04±0.12 | 0.79 |
| C2_372    | Eukaryotic translation initiation factor 3 subunit L               | EIF3L    | 1.28±0.13 | 1.68±0.09 | 0.76 |
| C2_68     | Eukaryotic translation initiation factor 3 subunit M               | EIF3M    | 1.8±0.32  | 1.88±0.26 | 0.96 |

|           |                                                         |         |            |            |      |
|-----------|---------------------------------------------------------|---------|------------|------------|------|
| C2_2506   | Eukaryotic translation initiation factor 4 gamma 1      | EIF4G1  | 1.01±0.08  | 1.13±0.05  | 0.89 |
| C2_8056   | Eukaryotic translation initiation factor 4 gamma 2      | EIF4G2  | 0.68±0.12  | 0.67±0.03  | 1.01 |
| C2_8077   | Eukaryotic translation initiation factor 4 gamma 3      | EIF4G3  | 52.87±17.6 | 76.65±8.3  | 0.69 |
| C2_51056  | Eukaryotic translation initiation factor 4B             | EIF4B   | 0.93±0.03  | 2.47±0.9   | 0.38 |
| C2_1810   | Eukaryotic translation initiation factor 4E             | EIF4E   | 1.55±0.31  | 2.95±1.02  | 0.53 |
| C2_2058   | Eukaryotic translation initiation factor 4E type 2      | EIF4E2  | 0.74±0.11  | 0.59±0.03  | 1.26 |
| C2_1883   | Eukaryotic translation initiation factor 4E type 3      | EIF4E3  | 1.05±0.04  | 1.35±0.1   | 0.78 |
| C2_41590  | Eukaryotic translation initiation factor 4H             | EIF4H   | 1.05±0.13  | 1.34±0.07  | 0.78 |
| C2_6179   | Eukaryotic translation initiation factor 5              | EIF5    | 0.77±0.08  | 1.38±0.21  | 0.56 |
| C2_37824  | Eukaryotic translation initiation factor 5A-2           | EIF5A2  | 0.95±0.03  | 2.81±1.96  | 0.34 |
| C2_6319   | Eukaryotic translation initiation factor 6              | EIF6    | 1.1±0.1    | 6.98±2.01  | 0.16 |
| C2_23794  | Exocyst complex component 1                             | EXOC1   | 0.89±0.04  | 0.94±0.12  | 0.95 |
| C2_5273   | Exocyst complex component 2                             | EXOC2   | 1.03±0.11  | 1.78±0.16  | 0.58 |
| C2_25949  | Exocyst complex component 2                             | EXOC2   | 0.65±0.13  | 0.75±0.13  | 0.87 |
| C2_2647   | Exocyst complex component 3                             | EXOC3   | 0.83±0.09  | 1.39±0.25  | 0.60 |
| C2_35997  | Exocyst complex component 4                             | EXOC4   | 0.93±0.09  | 0.93±0.03  | 1.00 |
| C2_7782   | Exocyst complex component 5                             | EXOC5   | 0.7±0.11   | 0.8±0.2    | 0.87 |
| C2_48178  | Exocyst complex component 6                             | EXOC6   | 0.78±0.09  | 0.79±0.16  | 0.98 |
| C2_3098   | Exocyst complex component 7                             | EXOC7   | 0.74±0.09  | 0.97±0.11  | 0.76 |
| C2_34349  | Exportin-1                                              | XPO1    | 1.34±0.14  | 2.68±0.56  | 0.50 |
| C2_24267  | Exportin-1                                              | XPO1    | 1.09±0.07  | 1.18±0.06  | 0.93 |
| C2_54734  | Exportin-1                                              | XPO1    | 1.37±0.19  | 1.43±0.15  | 0.96 |
| C2_6241   | Exportin-2                                              | CSE1L   | 1.03±0.01  | 1.06±0.11  | 0.97 |
| C2_10252  | Extended synaptotagmin-1                                | ESYT1   | 0.96±0.03  | 1.27±0.13  | 0.75 |
| C2_10706  | Ezrin                                                   | EZR     | 0.92±0.03  | 3.6±2.06   | 0.25 |
| C2_24358  | Ezrin                                                   | EZR     | 1.29±0.14  | 2.52±0.67  | 0.51 |
| C2_1226   | FACT complex subunit SSRP1                              | SSRP1   | 1.04±0.07  | 1.23±0.05  | 0.85 |
| C2_356    | F-actin-capping protein subunit alpha-1                 | CAPZA1  | 1.03±0.05  | 1.46±0.15  | 0.71 |
| C2_882    | F-actin-capping protein subunit alpha-1                 | CAPZA1  | 0.87±0.05  | 0.91±0.05  | 0.95 |
| C2_207    | F-actin-capping protein subunit alpha-2                 | CAPZA2  | 1.66±0.22  | 1.76±0.08  | 0.94 |
| C2_227    | F-actin-capping protein subunit beta                    | CAPZB   | 1.97±0.33  | 2.29±0.1   | 0.86 |
| C2_2375   | Factor VIII intron 22 protein                           | F8A1    | 0.9±0.04   | 1.23±0.16  | 0.73 |
| C2_12375  | FAD synthase                                            | FLAD1   | 0.68±0.11  | 0.64±0.03  | 1.07 |
| C2_3159   | FAD-linked sulfhydryl oxidase ALR                       | GFER    | 1.51±0.26  | 1.12±0.11  | 1.35 |
| C2_17942  | Far upstream element-binding protein 3                  | FUBP3   | 0.9±0.04   | 1.4±0.26   | 0.64 |
| C2_10323  | Farnesyl pyrophosphate synthase                         | FDPS    | 1.84±0.34  | 0.84±0.06  | 2.18 |
| C2_7862   | FAS-associated factor 1                                 | FAF1    | 1.04±0.02  | 0.85±0.07  | 1.23 |
| C2_750    | Fatty acid binding protein 6                            | FABP6   | 0.85±0.06  | 25.85±2.24 | 0.03 |
| C2_8342   | Fatty acid-binding protein, brain                       | FABP7   | 0.9±0.1    | 0.57±0.08  | 1.60 |
| C2_168    | Fatty acid-binding protein, heart                       | FABP3   | 1.51±0.21  | 1.82±0.2   | 0.83 |
| C2_51889  | Fatty acid-binding protein, intestinal                  | FABP2   | 6.08±2.04  | 6.72±0.81  | 0.90 |
| C2_28163  | Fatty acid-binding protein, intestinal                  | FABP2   | 5.86±2.02  | 1.83±0.05  | 3.20 |
| C2_23355  | Fatty acid-binding protein, liver-type                  | FABP1   | 0.95±0.14  | 0.23±0.02  | 4.16 |
| C2_5343   | Fatty aldehyde dehydrogenase                            | ALDH3A2 | 0.99±0.19  | 0.16±0.01  | 6.06 |
| C2_6597   | F-box only protein 2                                    | FBXO2   | 0.8±0.07   | 1.35±0.15  | 0.59 |
| C2_10150  | F-box only protein 22                                   | FBXO22  | 1.62±0.21  | 1.27±0.08  | 1.27 |
| C2_89103  | F-box only protein 3                                    | FBXO3   | 0.6±0.14   | 0.42±0.05  | 1.43 |
| C2_58512  | F-box/LRR-repeat protein 3                              | FBXL3   | 1±0.11     | 1.15±0.07  | 0.87 |
| C2_32224  | F-box/WD repeat-containing protein 12                   | FBXW12  | 0.94±0.09  | 0.65±0.08  | 1.44 |
| C2_12659  | F-box-like/WD repeat-containing protein TBL1XR1         | TBL1XR1 | 1.28±0.18  | 1.59±0.17  | 0.81 |
| C2_5555   | FCH domain only protein 2                               | FCHO2   | 1.23±0.08  | 1.47±0.07  | 0.84 |
| C2_37659  | Female protein                                          | WTAP    | 1.04±0.1   | 0.67±0.04  | 1.56 |
| C2_76725  | FERM domain-containing protein 4B                       | FRMD4B  | 0.67±0.23  | 0.78±0.39  | 0.85 |
| C2_43673  | FERM, RhoGEF and pleckstrin domain-containing protein 2 | FARP2   | 0.79±0.11  | 0.6±0.04   | 1.31 |
| C2_89675  | Fermitin family homolog 1                               | FERMT1  | 1.12±0.06  | 1.01±0.01  | 1.11 |
| C2_1658   | Ferritin, heavy subunit                                 | FTH1    | 0.82±0.06  | 0.92±0.21  | 0.89 |
| C2_101117 | Ferritin, middle subunit                                | FRIM    | 0.78±0.07  | 1.11±0.34  | 0.70 |
| C2_43968  | FGGY carbohydrate kinase domain-containing protein      | FGGY    | 0.85±0.08  | 0.7±0.08   | 1.21 |
| FP331537  | Fibrinogen alpha chain                                  | FGA     | 0.86±0.07  | 0.83±0.23  | 1.04 |
| FP332538  | Fibrinogen beta chain                                   | FGB     | 0.86±0.1   | 0.83±0.13  | 1.02 |
| FP339542  | Fibrinogen beta chain                                   | FGB     | 0.91±0.07  | 0.69±0.17  | 1.32 |
| FP332283  | Fibrinogen beta chain                                   | FGB     | 0.75±0.09  | 0.55±0.15  | 1.37 |
| C2_38689  | Fibrinogen gamma chain                                  | FGG     | 0.89±0.04  | 0.84±0.15  | 1.06 |
| C2_5254   | Fibronectin                                             | FN1     | 1.18±0.07  | 1.05±0.16  | 1.13 |
| C3_c35930 | Fibronectin                                             | FN1     | 1.16±0.06  | 0.94±0.14  | 1.23 |
| C2_58470  | Fibronectin                                             | FN1     | 0.99±0.06  | 0.8±0.11   | 1.24 |
| C2_63263  | Fibronectin                                             | FN1     | 0.92±0.03  | 0.61±0.08  | 1.51 |

|           |                                                                    |           |           |           |      |
|-----------|--------------------------------------------------------------------|-----------|-----------|-----------|------|
| C2_69917  | Filamin-A                                                          | FLNA      | 0.79±0.07 | 1±0.3     | 0.79 |
| C2_890    | Filamin-A                                                          | FLNA      | 0.97±0.06 | 1.23±0.11 | 0.79 |
| C2_6274   | Filamin-A                                                          | FLNA      | 0.73±0.09 | 0.89±0.19 | 0.82 |
| C2_45805  | Filamin-A                                                          | FLNA      | 0.85±0.06 | 0.98±0.2  | 0.86 |
| C2_79807  | Filamin-B                                                          | FLNB      | 0.85±0.1  | 0.46±0.03 | 1.86 |
| C2_65152  | Filamin-C                                                          | FLNC      | 1.15±0.06 | 2.49±0.33 | 0.46 |
| C2_22478  | Filamin-C                                                          | FLNC      | 0.84±0.15 | 1.01±0.38 | 0.83 |
| C2_6583   | FK506-binding protein 1                                            | FKBP4     | 1.67±0.31 | 2±0.04    | 0.84 |
| C2_1227   | Flavin reductase (NADPH)                                           | BLVRB     | 1.07±0.09 | 1.76±0.33 | 0.61 |
| C2_118260 | Folate receptor beta                                               | FOLR2     | 0.67±0.12 | 0.36±0.04 | 1.84 |
| C2_13579  | Formin-binding protein 1-like                                      | Fnbp1l    | 1.02±0.02 | 1.71±0.06 | 0.60 |
| C2_6545   | Fructose-1,6-bisphosphatase 1                                      | FBP1      | 2.78±0.76 | 1.23±0.09 | 2.25 |
| C2_1600   | Fructose-1,6-bisphosphatase isozyme 2                              | FBP2      | 2.58±0.97 | 3.48±0.79 | 0.74 |
| C2_185    | Fructose-bisphosphate aldolase B                                   | ALDOB     | 2.11±0.41 | 1.63±0.24 | 1.29 |
| C2_1285   | Fructose-bisphosphate aldolase C-B                                 | ALDOC     | 1±0.11    | 1.62±0.2  | 0.62 |
| C2_23658  | Fructose-bisphosphate aldolase, muscle type                        | FREM2     | 1.57±0.28 | 2.42±0.68 | 0.65 |
| C2_32246  | Fucolectin                                                         | FCL       | 0.66±0.11 | 0.64±0.04 | 1.02 |
| C2_121698 | Fucolectin-1                                                       | FCL1      | 0.81±0.07 | 0.7±0.03  | 1.17 |
| C2_116478 | Fucolectin-5                                                       | FCL5      | 0.99±0.04 | 1.3±0.23  | 0.77 |
| C2_1866   | Fucose mutarotase                                                  | FUOM      | 0.72±0.09 | 0.7±0.03  | 1.02 |
| C2_5086   | Fumarate hydratase, mitochondrial                                  | FH        | 1.53±0.2  | 1.39±0.13 | 1.10 |
| C2_3348   | Fumarylacetoacetase                                                | FAH       | 0.77±0.08 | 0.75±0.08 | 1.03 |
| C2_24896  | Fumarylacetoacetate hydrolase domain-containing protein 1          | FAHD1     | 0.77±0.11 | 0.44±0.04 | 1.73 |
| C2_1568   | Fumarylacetoacetate hydrolase domain-containing protein 2          | FAHD2B    | 0.76±0.1  | 0.79±0.06 | 0.96 |
| C2_11237  | GA-binding protein alpha chain                                     | GABPA     | 0.92±0.06 | 0.85±0.09 | 1.09 |
| C2_2035   | Galactocerebrosidase                                               | GALC      | 0.77±0.13 | 0.6±0.08  | 1.28 |
| C2_14778  | Galactokinase                                                      | GALK1     | 0.99±0.07 | 2.77±0.79 | 0.36 |
| C2_11273  | Galactose-1-phosphate uridylyltransferase                          | GALT      | 0.98±0.06 | 2±0.16    | 0.49 |
| C2_28569  | Galectin-3                                                         | LGALS3    | 0.84±0.09 | 0.41±0.05 | 2.05 |
| C2_12854  | Galectin-8                                                         | LGALS8    | 0.95±0.06 | 0.99±0.07 | 0.95 |
| C2_985    | Galectin-9                                                         | LGALS9B   | 1.01±0.06 | 1.01±0.12 | 1.01 |
| C2_14958  | Galectin-related protein                                           | LGALS     | 0.76±0.09 | 0.56±0.06 | 1.36 |
| C2_226    | Gamma-aminobutyric acid receptor-associated protein                | GABARAPL1 | 0.8±0.07  | 0.97±0.04 | 0.82 |
| C2_384    | Gamma-aminobutyric acid receptor-associated protein-like 2         | GABARAPL2 | 0.82±0.07 | 0.86±0.04 | 0.95 |
| C2_5451   | Gamma-butyrobetaine dioxygenase                                    | BBOX1     | 0.71±0.12 | 0.24±0.02 | 3.01 |
| C2_3265   | Gamma-glutamyl hydrolase                                           | GGH       | 0.82±0.07 | 0.94±0.08 | 0.87 |
| AM954422  | Gamma-glutamylaminocyclotransferase A                              | GGACT     | 0.87±0.07 | 0.64±0.05 | 1.36 |
| C2_15180  | Gamma-glutamylcyclotransferase                                     | GGCT      | 0.94±0.08 | 0.9±0.05  | 1.04 |
| C2_1354   | Gamma-glutamyltranspeptidase 1                                     | GGT1      | 0.69±0.12 | 0.53±0.05 | 1.29 |
| C2_63     | Gamma-interferon-inducible lysosomal thiol reductase               | IFI30     | 0.71±0.1  | 0.85±0.19 | 0.83 |
| C2_2606   | Ganglioside GM2 activator                                          | GM2A      | 0.67±0.12 | 0.46±0.08 | 1.46 |
| C2_34628  | Gastric intrinsic factor                                           | GIF       | 0.55±0.17 | 0.18±0.01 | 3.10 |
| C2_14681  | GDH/6PGL endoplasmic bifunctional protein                          | H6PD      | 0.95±0.04 | 0.65±0.02 | 1.47 |
| C2_11267  | GDP-D-glucose phosphorylase C15orf58 homolog                       | GDPGP1    | 1.04±0.1  | 1.62±0.07 | 0.64 |
| C2_3719   | GDP-mannose 4,6 dehydratase                                        | GMDS      | 0.78±0.12 | 0.42±0.02 | 1.87 |
| C2_265    | Gelsolin                                                           | GSN       | 1.14±0.1  | 1.03±0.06 | 1.11 |
| C2_17159  | Gephyrin                                                           | GPHN      | 0.9±0.05  | 0.86±0.04 | 1.05 |
| C2_3592   | Geranylgeranyl pyrophosphate synthase                              | GGPS1     | 0.89±0.05 | 0.87±0.05 | 1.02 |
| C2_16413  | Geranylgeranyl transferase type-1 subunit beta                     | PGGT1B    | 1.03±0.02 | 0.87±0.04 | 1.19 |
| C2_16816  | Geranylgeranyl transferase type-2 subunit beta                     | RABGGTB   | 0.86±0.05 | 1.03±0.05 | 0.83 |
| C2_11265  | Glia maturation factor beta                                        | GMFB      | 1.22±0.2  | 2.7±0.42  | 0.45 |
| C2_1692   | Glia-derived nexin                                                 | SERPINE2  | 0.75±0.09 | 0.64±0.12 | 1.17 |
| C2_2386   | Glucosamine 6-phosphate N-acetyltransferase                        | GNPNAT1   | 1.08±0.08 | 0.41±0.05 | 2.66 |
| C2_768    | Glucosamine-6-phosphate isomerase 1                                | GNPDA1    | 1.87±0.32 | 4.27±0.19 | 0.44 |
| C2_8719   | Glucosamine--fructose-6-phosphate aminotransferase [isomerizing] 1 | GNPDA1    | 0.98±0.06 | 0.93±0.14 | 1.05 |
| C2_69259  | Glucosamine--fructose-6-phosphate aminotransferase [isomerizing] 1 | GNPDA1    | 0.84±0.18 | 0.55±0.1  | 1.52 |
| C2_20259  | Glucosamine--fructose-6-phosphate aminotransferase [isomerizing] 2 | GNPDA2    | 1.25±0.26 | 1.65±0.72 | 0.76 |
| C2_60606  | Glucosamine--fructose-6-phosphate aminotransferase [isomerizing] 2 | GNPDA2    | 1.6±0.42  | 1.4±0.11  | 1.14 |
| C2_7677   | Glucose-6-phosphatase 3                                            | G6PC3     | 0.9±0.04  | 0.51±0.06 | 1.76 |
| C2_5943   | Glucose-6-phosphate 1-dehydrogenase                                | G6PD      | 1.08±0.09 | 1.4±0.14  | 0.77 |
| C2_394    | Glucose-6-phosphate isomerase                                      | GPI       | 0.71±0.12 | 0.52±0.07 | 1.37 |
| C2_2612   | Glucosidase 2 subunit beta                                         | PRKCSH    | 1.13±0.15 | 0.59±0.1  | 1.90 |
| C2_1745   | Glucosylceramidase                                                 | GBA       | 0.76±0.14 | 0.48±0.05 | 1.59 |

|           |                                                                            |         |           |           |      |
|-----------|----------------------------------------------------------------------------|---------|-----------|-----------|------|
| C2_10880  | Glucuronokinase 1                                                          | GLCAK1  | 0.92±0.11 | 0.86±0.13 | 1.07 |
| C2_23708  | Glutamate carboxypeptidase 2                                               | Folh1   | 0.77±0.1  | 0.53±0.01 | 1.47 |
| C2_3924   | Glutamate dehydrogenase, mitochondrial                                     | GLUD1   | 3.02±0.98 | 0.93±0.02 | 3.25 |
| C2_2794   | Glutamate--cysteine ligase catalytic subunit                               | GCLC    | 1.19±0.14 | 1.57±0.1  | 0.76 |
| C2_944    | Glutamine synthetase                                                       | GLUL    | 0.88±0.05 | 2.14±0.43 | 0.41 |
| C2_34856  | Glutamine-dependent NAD(+) synthetase                                      | NADSYN1 | 0.63±0.13 | 0.82±0.05 | 0.77 |
| C2_2268   | Glutaminyl-tRNA synthetase                                                 | Qars    | 1.03±0.07 | 1.77±0.34 | 0.58 |
| C2_4118   | Glutamyl aminopeptidase                                                    | ENPEP   | 0.74±0.1  | 0.61±0.07 | 1.22 |
| C2_46090  | Glutaredoxin                                                               | GLRX5   | 0.92±0.08 | 1.3±0.1   | 0.71 |
| C2_6320   | Glutaredoxin 3                                                             | GLRX3   | 1.07±0.14 | 2.77±0.6  | 0.39 |
| C2_57075  | Glutaredoxin 3                                                             | GLRX3   | 1.1±0.12  | 2.29±0.12 | 0.48 |
| C2_3733   | Glutaryl-CoA dehydrogenase, mitochondrial                                  | GCDH    | 1.32±0.12 | 0.86±0.07 | 1.54 |
| C2_345    | Glutathione peroxidase 1                                                   | GPX1    | 0.76±0.11 | 0.29±0.03 | 2.64 |
| C2_296    | Glutathione peroxidase 2                                                   | GPX2    | 0.71±0.12 | 0.3±0.03  | 2.36 |
| C2_4046   | Glutathione peroxidase 3                                                   | GPX3    | 0.6±0.13  | 0.55±0.03 | 1.08 |
| C2_4586   | Glutathione peroxidase 4a                                                  | GPX4A   | 0.94±0.04 | 0.69±0.03 | 1.37 |
| C2_19719  | Glutathione reductase, mitochondrial                                       | GSR     | 0.73±0.11 | 0.39±0.03 | 1.85 |
| C2_5598   | Glutathione S-transferase 3                                                | GSTA3   | 0.92±0.09 | 0.7±0.06  | 1.32 |
| C2_117130 | Glutathione S-transferase A                                                | GSTA1   | 1.48±0.35 | 1.16±0.1  | 1.27 |
| C2_112663 | Glutathione S-transferase A4                                               | GSTA4   | 1.2±0.09  | 2.02±0.12 | 0.59 |
| C2_112228 | Glutathione S-transferase alpha M14                                        | GSTAM14 | 1.32±0.11 | 2.13±0.16 | 0.62 |
| C2_430    | Glutathione S-transferase kappa 1                                          | GSTK1   | 0.8±0.11  | 0.46±0.04 | 1.74 |
| C2_868    | Glutathione S-transferase Mu 3                                             | Gstm3   | 1.23±0.08 | 1.16±0.08 | 1.06 |
| C2_1065   | Glutathione S-transferase omega-1                                          | GSTO1   | 1.1±0.08  | 1.03±0.02 | 1.08 |
| C2_1660   | Glutathione S-transferase theta-1                                          | Gstt1   | 1.51±0.3  | 2.89±0.1  | 0.52 |
| C2_5198   | Glutathione S-transferase theta-4                                          | Gstt4   | 2.73±0.67 | 3.64±0.34 | 0.75 |
| C2_109937 | Glutathione S-transferase Yc                                               | GSTA3   | 0.81±0.17 | 0.55±0.06 | 1.48 |
| C2_25988  | Glutathione synthetase                                                     | GSS     | 0.77±0.09 | 0.46±0.03 | 1.69 |
| C2_29     | Glyceraldehyde 3-phosphate dehydrogenase, testis-specific                  | GAPDH   | 0.72±0.1  | 1.02±0.17 | 0.71 |
| C2_17     | Glyceraldehyde-3-phosphate dehydrogenase                                   | GAPDH   | 0.75±0.16 | 0.29±0.04 | 2.62 |
| C2_688    | Glycerol-3-phosphate dehydrogenase [NAD+], cytoplasmic                     | GPD1    | 1.17±0.09 | 1.17±0.23 | 1.00 |
| C2_2813   | Glycerol-3-phosphate dehydrogenase 1-like protein                          | GPD1L   | 1.58±0.3  | 1.73±0.31 | 0.91 |
| C2_19238  | Glycerophosphodiester phosphodiesterase 1                                  | GDE1    | 0.84±0.11 | 0.45±0.03 | 1.86 |
| C2_3169   | Glycine amidinotransferase, mitochondrial                                  | GATM    | 0.95±0.04 | 0.71±0.07 | 1.34 |
| C2_1837   | Glycine cleavage system H protein, mitochondrial                           | GCSH    | 1.05±0.04 | 1.12±0.15 | 0.94 |
| C2_9479   | Glycine cleavage system H protein, mitochondrial                           | GCSH    | 0.9±0.17  | 0.16±0.03 | 5.74 |
| C3_c37918 | Glycine dehydrogenase [decarboxylating], mitochondrial                     | GLDC    | 1.3±0.19  | 0.4±0.05  | 3.22 |
| C2_23606  | Glycine dehydrogenase [decarboxylating], mitochondrial                     | GLDC    | 1.29±0.14 | 0.39±0.04 | 3.32 |
| C2_1076   | Glycine N-acyltransferase-like protein 3                                   | GLYATL3 | 1.32±0.19 | 4.21±0.2  | 0.31 |
| C2_70872  | Glycine N-acyltransferase-like protein Keg1                                | Keg1    | 0.8±0.07  | 0.68±0.06 | 1.18 |
| C2_27493  | Glycine N-methyltransferase                                                | GNMT    | 3.35±0.92 | 1.11±0.16 | 3.01 |
| C2_20446  | Glycogen debranching enzyme                                                | AGL     | 2.26±0.54 | 2.83±0.36 | 0.80 |
| C2_15427  | Glycogen debranching enzyme                                                | AGL     | 1.12±0.06 | 1.29±0.03 | 0.87 |
| C2_7766   | Glycogen debranching enzyme                                                | AGL     | 1.21±0.09 | 1.35±0.09 | 0.90 |
| C2_8664   | Glycogen debranching enzyme                                                | AGL     | 1.1±0.04  | 0.5±0.08  | 2.21 |
| C2_4003   | Glycogen phosphorylase, liver form                                         | PYGL    | 0.75±0.09 | 0.93±0.12 | 0.81 |
| C2_75689  | Glycogen phosphorylase, liver form                                         | PYGL    | 0.96±0.03 | 0.73±0.07 | 1.31 |
| C2_5276   | Glycogen phosphorylase, muscle form                                        | PYGM    | 0.92±0.04 | 1.32±0.12 | 0.70 |
| C2_1350   | Glycolipid transfer protein                                                | GLTP    | 0.95±0.06 | 1.35±0.1  | 0.70 |
| C2_637    | Glycylpeptide N-tetradecanoyltransferase 1                                 | NMT1    | 0.93±0.04 | 0.73±0.05 | 1.27 |
| C2_1726   | Glycyl-tRNA synthetase                                                     | GLYS    | 1.13±0.1  | 1.64±0.08 | 0.69 |
| C2_2114   | Glyoxalase domain-containing protein 4                                     | GLOD4   | 1.59±0.24 | 1.95±0.05 | 0.82 |
| C2_2680   | Glyoxalase domain-containing protein 5                                     | GLOD5   | 0.72±0.11 | 0.39±0.03 | 1.85 |
| C2_1994   | Glyoxylate reductase/hydroxypyruvate reductase                             | GRHPR   | 0.94±0.08 | 0.83±0.08 | 1.13 |
| C2_1539   | GMP synthase [glutamine-hydrolyzing]                                       | GMPS    | 0.93±0.06 | 0.98±0.07 | 0.94 |
| C2_25456  | Golgi SNAP receptor complex member 2                                       | GOSR2   | 0.75±0.08 | 0.62±0.04 | 1.21 |
| C2_12302  | Golgi-specific brefeldin A-resistance guanine nucleotide exchange factor 1 | GBF1    | 0.94±0.04 | 1.04±0.06 | 0.91 |
| C2_3971   | Grancalcin                                                                 | GCA     | 1.4±0.16  | 1.89±0.1  | 0.74 |
| C2_4717   | Growth factor receptor-bound protein 2                                     | GRB2    | 1.87±0.48 | 2.94±0.11 | 0.63 |
| C2_26978  | GTPase IMAP family member 2                                                | GIMAP2  | 1.29±0.11 | 1.25±0.04 | 1.03 |
| C2_28934  | GTPase IMAP family member 4                                                | GIMAP4  | 1.02±0.09 | 1±0.06    | 1.02 |
| C2_2112   | GTPase KRas                                                                | KRAS    | 1.29±0.11 | 1.48±0.15 | 0.88 |
| C2_1141   | GTP-binding nuclear protein Ran                                            | RAN     | 1.73±0.39 | 2.91±0.54 | 0.59 |
| C2_1272   | GTP-binding protein SAR1b                                                  | SAR1B   | 1.31±0.11 | 1.33±0.11 | 0.99 |
| C2_762    | Guanidinoacetate N-methyltransferase                                       | GAMT    | 3.04±0.82 | 1.73±0.05 | 1.76 |
| C2_18132  | Guanine nucleotide exchange factor VAV2                                    | VAV2    | 0.85±0.06 | 0.92±0.04 | 0.92 |



|           |                                                                  |           |           |           |      |
|-----------|------------------------------------------------------------------|-----------|-----------|-----------|------|
| C2_3738   | Guanine nucleotide-binding protein G(i) subunit alpha-1          | GNAI1     | 0.93±0.05 | 1.2±0.14  | 0.77 |
| C2_829    | Guanine nucleotide-binding protein G(i) subunit alpha-2          | GNAI2     | 0.92±0.03 | 1±0.08    | 0.92 |
| C2_8162   | Guanine nucleotide-binding protein G(l)/G(S)/G(T) subunit beta-1 | GNB1      | 1.58±0.28 | 0.88±0.05 | 1.81 |
| C2_3700   | Guanine nucleotide-binding protein G(o) subunit alpha            | GNAO1     | 0.78±0.07 | 0.98±0.02 | 0.80 |
| C2_11577  | Guanine nucleotide-binding protein G(olf) subunit alpha          | GNAL      | 1.12±0.07 | 0.86±0.12 | 1.30 |
| C2_17403  | Guanine nucleotide-binding protein G(q) subunit alpha            | GNAQ      | 1.18±0.08 | 0.88±0.04 | 1.33 |
| C2_75053  | Guanine nucleotide-binding protein subunit alpha-11              | GNA11     | 1.15±0.07 | 1.12±0.05 | 1.03 |
| C2_45     | Guanine nucleotide-binding protein subunit beta-2-like 1         | GNB2L1    | 1.76±0.39 | 1.67±0.17 | 1.05 |
| C2_10055  | Guanosine-3',5'-bis(diphosphate) 3'-pyrophosphohydrolase MESH1   | HDDC3     | 1.38±0.22 | 2.22±0.14 | 0.62 |
| C2_2205   | H/ACA ribonucleoprotein complex subunit 4                        | DKC1      | 1.25±0.11 | 1.34±0.09 | 0.93 |
| C2_4167   | H-2 class I histocompatibility antigen, L-D alpha chain          | HLA-A     | 1.44±0.16 | 0.92±0.05 | 1.57 |
| C2_3408   | Haloacid dehalogenase-like hydrolase domain-containing protein 2 | HDHD2     | 0.81±0.11 | 0.55±0.06 | 1.46 |
| C2_14618  | Haptoglobin                                                      | HP        | 1.02±0.13 | 1.02±0.09 | 1.00 |
| C2_5901   | Harmonin                                                         | USH1C     | 1.3±0.29  | 2.8±0.25  | 0.47 |
| C2_5365   | HEAT repeat-containing protein 7A                                | MROH1     | 0.93±0.07 | 1.71±0.47 | 0.55 |
| C2_15999  | Heat shock 70 kDa protein 1                                      | HSPA1L    | 1.1±0.08  | 1.17±0.12 | 0.94 |
| C2_13612  | Heat shock 70 kDa protein 4                                      | HSPA4     | 0.98±0.1  | 1.56±0.61 | 0.63 |
| C2_6720   | Heat shock 70 kDa protein 4                                      | HSPA4     | 1.23±0.09 | 1.59±0.31 | 0.77 |
| C2_58     | Heat shock cognate 70 kDa protein                                | Hspa1b    | 2.51±0.51 | 2.57±0.16 | 0.98 |
| C2_330    | Heat shock factor-binding protein 1                              | HSBP1     | 1.09±0.07 | 2.49±0.18 | 0.44 |
| C2_2116   | Heat shock protein 105 kDa                                       | HSPH1     | 1.39±0.18 | 3.69±1.05 | 0.38 |
| C2_25526  | Heat shock protein 67B2                                          | Tstd3     | 0.98±0.1  | 2.06±0.1  | 0.48 |
| C2_11513  | Heme-binding protein 1                                           | HEBP1     | 1.27±0.11 | 1.7±0.03  | 0.75 |
| C2_69269  | Heme-binding protein 2                                           | HEBP2     | 0.84±0.06 | 1.73±0.05 | 0.49 |
| C2_2327   | Hemicentin-1                                                     | HMCN1     | 1.36±0.21 | 1.55±0.2  | 0.88 |
| C2_7127   | Hemoglobin subunit alpha-A                                       | HBAA      | 0.8±0.15  | 0.64±0.06 | 1.25 |
| C2_5435   | Hemoglobin subunit alpha-B                                       | HBAB      | 0.79±0.15 | 0.66±0.08 | 1.21 |
| C2_102093 | Hemoglobin subunit beta                                          | HBB       | 0.79±0.12 | 0.68±0.05 | 1.16 |
| C2_105738 | Hemoglobin subunit beta                                          | HBB       | 0.72±0.13 | 0.51±0.02 | 1.42 |
| C2_78448  | Hemoglobin subunit beta-A                                        | Hbb-b2    | 0.72±0.12 | 0.63±0.05 | 1.14 |
| C2_27397  | Hemopexin                                                        | HPX       | 0.85±0.08 | 0.96±0.14 | 0.89 |
| C2_9919   | Hepatocyte growth factor-regulated tyrosine kinase substrate     | HGS       | 0.82±0.07 | 1.81±0.1  | 0.45 |
| C2_7954   | Hepatocyte nuclear factor 4-gamma                                | HNF4G     | 0.85±0.08 | 0.73±0.08 | 1.16 |
| C2_1739   | Hepatoma-derived growth factor                                   | HDGF      | 1.43±0.28 | 2.82±0.13 | 0.51 |
| FM151678  | Hephaestin                                                       | HEPH      | 0.84±0.06 | 0.6±0.11  | 1.40 |
| C2_6512   | Heterogeneous nuclear ribonucleoprotein A/B                      | HNRNPAB   | 1.25±0.1  | 2.85±1.25 | 0.44 |
| C2_1787   | Heterogeneous nuclear ribonucleoprotein A0                       | HNRNPA0   | 1.11±0.12 | 2.27±0.2  | 0.49 |
| C2_24145  | Heterogeneous nuclear ribonucleoprotein A1                       | Hnrnpa1   | 1.29±0.21 | 1.79±0.1  | 0.72 |
| C2_15328  | Heterogeneous nuclear ribonucleoprotein C                        | HNRNPC    | 1.03±0.09 | 1.07±0.1  | 0.96 |
| C2_3241   | Heterogeneous nuclear ribonucleoprotein H                        | HNRNPH1   | 1.37±0.13 | 1.36±0.02 | 1.01 |
| C2_15127  | Heterogeneous nuclear ribonucleoprotein M                        | HNRNPM    | 1.1±0.04  | 2.84±0.85 | 0.39 |
| C2_63887  | Heterogeneous nuclear ribonucleoprotein M                        | HNRNPM    | 0.92±0.07 | 0.8±0.04  | 1.15 |
| C2_26519  | Heterogeneous nuclear ribonucleoprotein Q                        | SYNCRIP   | 1.01±0.03 | 1.19±0.22 | 0.85 |
| C2_53445  | Heterogeneous nuclear ribonucleoprotein R                        | HNRNPR    | 0.96±0.04 | 0.81±0.06 | 1.19 |
| C2_46867  | Heterogeneous nuclear ribonucleoprotein U                        | HNRNPU    | 1.01±0.05 | 1.06±0.13 | 0.95 |
| C2_1517   | Heterogeneous nuclear ribonucleoprotein U-like protein 1         | HNRNPUL1  | 1.27±0.1  | 1.38±0.05 | 0.92 |
| C2_75390  | Hexokinase-1                                                     | HK1       | 0.91±0.05 | 1.15±0.31 | 0.79 |
| C2_81938  | Hexokinase-2                                                     | HK2       | 0.98±0.03 | 1.04±0.09 | 0.94 |
| C2_4097   | Hexosaminidase D                                                 | HEXDC     | 0.83±0.06 | 0.78±0.05 | 1.07 |
| C2_8165   | Hibernation-specific plasma protein HP-55                        | HP55      | 1.01±0.04 | 0.86±0.11 | 1.17 |
| C2_13670  | High affinity cGMP-specific 3',5'-cyclic phosphodiesterase 9A    | PDE9A     | 1.19±0.32 | 1.67±0.48 | 0.72 |
| C2_11749  | High choriolytic enzyme 1                                        | HCEA      | 0.64±0.17 | 0.31±0.07 | 2.09 |
| C2_3658   | Histamine N-methyltransferase                                    | HNMT      | 0.83±0.06 | 0.69±0.04 | 1.21 |
| C2_1967   | Histamine N-methyltransferase A                                  | HNMT      | 1.6±0.34  | 1.98±0.24 | 0.81 |
| C2_2901   | Histidine triad nucleotide-binding protein 1                     | HINT1     | 1.13±0.07 | 2.18±0.45 | 0.52 |
| C2_9935   | Histidyl-tRNA synthetase, cytoplasmic                            | HARS2     | 1.49±0.2  | 1.25±0.11 | 1.19 |
| C2_65292  | Histidyl-tRNA synthetase, cytoplasmic                            | HARS2     | 1.39±0.17 | 1.12±0.04 | 1.24 |
| C2_16721  | Histone deacetylase 10                                           | HDAC10    | 1.61±0.25 | 2±0.19    | 0.80 |
| C2_12456  | Histone H2A                                                      | H2AFB3    | 1.17±0.08 | 3.02±0.92 | 0.39 |
| C2_390    | Histone H2A.V                                                    | H2AFV     | 1.13±0.22 | 1.56±0.26 | 0.73 |
| C2_101057 | Histone H2B 1/2                                                  | HIST2H2BE | 2.47±0.54 | 1.79±0.21 | 1.38 |
| C2_3081   | Histone H3.3                                                     | H3F3A     | 5.3±1.68  | 2.29±0.24 | 2.32 |
| C2_117463 | Histone H4                                                       | HIST1H4A  | 5.48±2.24 | 2.08±0.28 | 2.63 |
| C2_2830   | Histone-binding protein RBBP7                                    | RBBP7     | 1.05±0.05 | 1.25±0.08 | 0.84 |
| C2_16287  | Histone-lysine N-methyltransferase setd3                         | SETD3     | 0.92±0.11 | 0.98±0.11 | 0.94 |

|             |                                                                        |           |           |            |      |
|-------------|------------------------------------------------------------------------|-----------|-----------|------------|------|
| C2_7824     | Homocysteine S-methyltransferase ybgG                                  | YBGG      | 1.19±0.17 | 1.09±0.06  | 1.09 |
| C2_25525    | Host cell factor 1                                                     | HCFC1     | 0.89±0.07 | 0.62±0.05  | 1.44 |
| C2_16741    | Host cell factor 1                                                     | HCFC1     | 0.86±0.11 | 0.56±0.04  | 1.53 |
| C2_6226     | Hsc70-interacting protein                                              | ST13      | 0.98±0.04 | 2.45±0.65  | 0.40 |
| C2_1435     | Hsp70-binding protein 1                                                | HSPBP1    | 0.98±0.11 | 1.14±0.15  | 0.86 |
| C2_17788    | Huntingtin                                                             | HTT       | 1.23±0.08 | 1.58±0.18  | 0.78 |
| C2_39681    | Hyaluronan-binding protein 2                                           | HABP2     | 0.94±0.03 | 1.05±0.05  | 0.90 |
| C2_23228    | Hyaluronidase-1                                                        | HYAL1     | 0.66±0.13 | 0.47±0.05  | 1.39 |
| C2_15683    | Hyaluronidase-2                                                        | HYAL2     | 0.72±0.12 | 0.32±0.04  | 2.23 |
| C2_15186    | Hydroxyacid-oxoacid transhydrogenase, mitochondrial                    | ADHFE1    | 0.87±0.05 | 0.5±0.01   | 1.74 |
| C2_465      | Hydroxyacyl-coenzyme A dehydrogenase, mitochondrial                    | HADH      | 0.78±0.13 | 0.2±0.02   | 3.90 |
| C2_610      | Hydroxyacylglutathione hydrolase, mitochondrial                        | HAGH      | 1.16±0.06 | 1.27±0.07  | 0.91 |
| C2_1134     | Hydroxymethylglutaryl-CoA lyase                                        | HMGCL     | 1.18±0.08 | 0.87±0.08  | 1.36 |
| C2_17940    | Hydroxymethylglutaryl-CoA synthase, cytoplasmic                        | HMGCS1    | 1.2±0.17  | 0.66±0.05  | 1.82 |
| C3_c25627   | hypothetical protein LOC100692391 [Oreochromis niloticus]              | GIMAP8    | 0.83±0.12 | 0.34±0.03  | 2.47 |
| C2_679      | Hypoxanthine-guanine phosphoribosyltransferase                         | HPRT1     | 1.74±0.32 | 2.28±0.03  | 0.76 |
| C2_6116     | Hypoxia-inducible factor 1-alpha inhibitor                             | HIF1AN    | 1.67±0.27 | 0.9±0.14   | 1.86 |
| C2_110618   | Ig heavy chain Mem5                                                    | Ighg2a    | 0.9±0.07  | 1.04±0.1   | 0.87 |
| C2_114371   | Ig heavy chain V region XIG14                                          | IGXIG14   | 0.94±0.03 | 1.03±0.12  | 0.91 |
| C2_58543    | Ig kappa chain V region 3315                                           | IGK3315   | 0.75±0.1  | 1±0.12     | 0.75 |
| C2_26869    | Ig kappa-b4 chain C region                                             | K-BAS     | 0.72±0.11 | 0.63±0.06  | 1.14 |
| C2_107145   | Ig lambda chain V-I region NEW                                         | IGLV1-NEW | 1±0.01    | 1±0.16     | 1.00 |
| C2_112414   | Ig lambda-3 chain C regions                                            | IGLC3     | 1.12±0.2  | 1.2±0.21   | 0.94 |
| C2_46036    | Ig mu chain C region                                                   | IGHM      | 1.17±0.2  | 2.06±0.47  | 0.57 |
| C2_4639     | Ig mu chain C region membrane-bound form                               | IGHM      | 0.99±0.24 | 0.85±0.26  | 1.16 |
| C2_13391    | IgGfC-binding protein                                                  | FCGBP     | 0.63±0.14 | 0.39±0.05  | 1.60 |
| C2_113099   | Immunoglobulin lambda-like polypeptide 5                               | IGLL5     | 0.69±0.12 | 0.65±0.05  | 1.06 |
| C2_2478     | Immunoglobulin-binding protein 1                                       | IGBP1     | 1.02±0.08 | 1.53±0.5   | 0.66 |
| C2_19893    | Importin subunit alpha-4                                               | KPNA3     | 1.14±0.16 | 1.73±0.11  | 0.66 |
| C2_2908     | Importin subunit alpha-4                                               | KPNA3     | 0.92±0.06 | 0.91±0.03  | 1.01 |
| C3_lrc8695  | Importin subunit beta-1                                                | KPNB1     | 1.67±0.3  | 2.22±0.16  | 0.75 |
| C3_c11824   | Importin-11                                                            | IPO11     | 1.25±0.08 | 0.84±0.11  | 1.48 |
| C2_92624    | Importin-5                                                             | IPO5      | 0.97±0.06 | 1.93±0.39  | 0.50 |
| C2_14281    | Importin-7                                                             | IPO7      | 1.02±0.05 | 1.57±0.13  | 0.65 |
| C3_c28568   | Importin-9                                                             | IPO9      | 0.82±0.06 | 0.7±0.05   | 1.18 |
| C2_126      | Inorganic pyrophosphatase                                              | PPA1      | 1.44±0.17 | 0.83±0.05  | 1.73 |
| C2_1885     | Inosine-5'-monophosphate dehydrogenase 2                               | IMPDH2    | 0.79±0.1  | 0.6±0.03   | 1.32 |
| C2_12079    | Inosine-uridine preferring nucleoside hydrolase                        | IUNH      | 1.86±0.36 | 0.63±0.04  | 2.94 |
| C2_14114    | Inositol monophosphatase 1                                             | IMPA1     | 0.97±0.11 | 1.12±0.1   | 0.87 |
| C2_4262     | Inositol monophosphatase 1                                             | IMPA1     | 0.95±0.04 | 0.92±0.05  | 1.03 |
| C2_78142    | Inositol monophosphatase 2                                             | IMPA2     | 1.26±0.12 | 0.88±0.09  | 1.43 |
| C2_19624    | Inositol polyphosphate 1-phosphatase                                   | INPP1     | 1.11±0.14 | 1.65±0.21  | 0.68 |
| C2_13269    | Inositol polyphosphate 5-phosphatase OCRL-1                            | OCRL      | 1.3±0.11  | 1.23±0.05  | 1.05 |
| C3_c55528   | Insulin-degrading enzyme                                               | IDE       | 0.81±0.07 | 0.91±0.06  | 0.90 |
| C2_42269    | Insulin-degrading enzyme                                               | IDE       | 0.83±0.06 | 0.82±0.04  | 1.01 |
| C2_8119     | Insulin-like growth factor binding protein complex acid liable subunit | IGFALS    | 1.08±0.09 | 1.25±0.13  | 0.86 |
| C2_5183     | Integrin alpha-M                                                       | ITGAM     | 0.86±0.05 | 0.7±0.06   | 1.23 |
| C2_12256    | Integrin beta-1                                                        | ITGB1     | 0.59±0.16 | 0.59±0.09  | 1.00 |
| C2_15079    | Integrin-linked protein kinase                                         | ILK       | 1.05±0.15 | 1.37±0.18  | 0.77 |
| C2_14668    | Intelectin-1a                                                          | ITLN1     | 0.64±0.13 | 0.39±0.05  | 1.66 |
| C2_36156    | Intelectin-2                                                           | ITLN2     | 0.76±0.14 | 0.39±0.06  | 1.93 |
| FP333792    | Inter-alpha-trypsin inhibitor heavy chain H2                           | ITI1H2    | 1.04±0.08 | 1.63±0.28  | 0.64 |
| C2_12615    | Inter-alpha-trypsin inhibitor heavy chain H3                           | ITI1H3    | 1.54±0.37 | 2.12±0.3   | 0.73 |
| C3_lrc30120 | inter-alpha-trypsin inhibitor heavy chain H3-like [Takifugu rubripes]  | ITI1H3    | 1.29±0.17 | 1.71±0.19  | 0.75 |
| C2_5524     | Interferon regulatory factor 5                                         | IRF5      | 1±0.07    | 1.29±0.16  | 0.77 |
| C2_624      | Interferon-induced 35 kDa protein homolog                              | IFI35     | 0.81±0.07 | 0.62±0.03  | 1.31 |
| C2_16818    | Interferon-induced GTP-binding protein Mx                              | MX1       | 1.05±0.02 | 1.02±0.15  | 1.03 |
| C2_8010     | Interleukin enhancer-binding factor 2 homolog                          | ILF2      | 1.37±0.18 | 2.05±0.05  | 0.67 |
| C2_10673    | Interleukin enhancer-binding factor 3 homolog                          | ILF3      | 0.91±0.06 | 0.95±0.04  | 0.96 |
| C2_118270   | Intermediate filament protein ON3                                      | ION3      | 2.95±1.09 | 12.22±3.47 | 0.24 |
| C3_c54887   | Intersectin-1                                                          | ITSN1     | 1.19±0.14 | 0.97±0.06  | 1.22 |
| C2_2049     | Intestinal-type alkaline phosphatase                                   | ALPI      | 0.89±0.07 | 0.38±0.02  | 2.34 |
| C2_3089     | Iron-responsive element-binding protein 2                              | IREB2     | 0.99±0.07 | 0.87±0.08  | 1.14 |
| C2_4651     | Isoamyl acetate-hydrolyzing esterase 1 homolog                         | IAH1      | 1.15±0.12 | 1.53±0.04  | 0.75 |
| C2_11243    | Isobutyryl-CoA dehydrogenase, mitochondrial                            | ACAD8     | 0.63±0.13 | 0.41±0.05  | 1.54 |

|                   |                                                                             |          |           |           |      |
|-------------------|-----------------------------------------------------------------------------|----------|-----------|-----------|------|
| C2_17229          | Isochorismatase domain-containing protein 2, mitochondrial                  | ISOC2    | 0.97±0.02 | 0.73±0.06 | 1.32 |
| C2_1776           | Isocitrate dehydrogenase [NADP] cytoplasmic                                 | IDH1     | 3.2±0.84  | 3.69±0.13 | 0.87 |
| C2_250            | Isocitrate dehydrogenase [NADP], mitochondrial                              | IDH2     | 1.04±0.08 | 1.42±0.14 | 0.74 |
| C3_c36816         | Isoleucine--tRNA ligase, cytoplasmic                                        | IARS     | 0.96±0.07 | 0.91±0.09 | 1.05 |
| C2_58851          | Isoleucyl-tRNA synthetase, cytoplasmic                                      | IARS     | 1.28±0.11 | 1.61±0.03 | 0.80 |
| C2_46456          | Isoleucyl-tRNA synthetase, cytoplasmic                                      | IARS     | 1.37±0.29 | 1.37±0.04 | 1.00 |
| C2_2044           | Isopentenyl-diphosphate Delta-isomerase 1                                   | IDI1     | 1.39±0.31 | 0.38±0.02 | 3.64 |
| C2_2160           | Isovaleryl-CoA dehydrogenase, mitochondrial                                 | IVD      | 0.7±0.11  | 0.35±0.04 | 2.00 |
| C2_18025          | IST1 homolog                                                                | IST1     | 0.89±0.08 | 1.38±0.24 | 0.64 |
| C2_2147           | Junction plakoglobin                                                        | JUP      | 1.24±0.08 | 2.46±0.3  | 0.50 |
| C2_23019          | Junction plakoglobin                                                        | JUP      | 1.03±0.09 | 1.71±0.1  | 0.60 |
| C2_1814           | Junctional adhesion molecule A                                              | F11R     | 0.95±0.07 | 0.95±0.08 | 1.01 |
| C2_6330           | Kallikrein-8                                                                | KLK8     | 0.58±0.14 | 1.04±0.28 | 0.56 |
| C2_5685           | Kaptin                                                                      | KPTN     | 0.84±0.06 | 0.41±0.01 | 2.06 |
| C2_83200          | Katanin p60 ATPase-containing subunit A-like 2                              | KATNAL2  | 1.92±0.34 | 3.36±0.33 | 0.57 |
| C2_7027           | KDEL motif-containing protein 1                                             | KDELC1   | 0.88±0.04 | 0.73±0.1  | 1.20 |
| C2_19579          | Keratin, type I cytoskeletal 13                                             | KRT13    | 1.14±0.19 | 2.19±0.12 | 0.52 |
| C2_2372           | Keratin, type I cytoskeletal 18                                             | KRT18    | 0.84±0.06 | 0.72±0.08 | 1.17 |
| C2_116635         | Keratin, type I cytoskeletal 18-A                                           | KRT18    | 0.77±0.16 | 0.31±0.05 | 2.46 |
| C2_86457          | Keratin, type I cytoskeletal 19                                             | KRT19    | 1.94±0.54 | 3.78±0.18 | 0.51 |
| C2_74897          | Keratin, type I cytoskeletal 19                                             | KRT19    | 1.59±0.21 | 2.82±1.33 | 0.56 |
| C2_51684          | Keratin, type I cytoskeletal 50 kDa                                         | KRT5     | 0.84±0.08 | 1.64±0.63 | 0.52 |
| C2_1442           | Keratin, type II cytoskeletal 8                                             | KRT8     | 0.82±0.09 | 0.5±0.04  | 1.65 |
| C2_2275           | Ketohexokinase                                                              | KHK      | 1.03±0.11 | 0.49±0.03 | 2.10 |
| C2_1049           | KH domain-containing, RNA-binding, signal transduction-associated protein 1 | KHDRBS1  | 2.19±0.71 | 6.02±1.6  | 0.36 |
| C2_4980           | Kinectin                                                                    | Ktn1     | 0.67±0.12 | 1.67±1.07 | 0.40 |
| C2_3990           | Kinectin                                                                    | Ktn1     | 0.74±0.09 | 1.24±0.32 | 0.60 |
| C2_7678           | Kinesin light chain 1                                                       | KLC1     | 0.92±0.05 | 1.35±0.13 | 0.68 |
| C2_38068          | Kinesin-like protein KIF3A                                                  | KIF3A    | 0.57±0.15 | 0.54±0.08 | 1.07 |
| C2_29495          | Kininogen                                                                   | Kng1     | 1.07±0.16 | 4.08±1.14 | 0.26 |
| s_fjad0002a08_f_1 | KLRAQ motif-containing protein 1                                            | PPP1R21  | 0.87±0.09 | 1.87±0.2  | 0.47 |
| C2_29253          | Kynureninase                                                                | KYNU     | 0.86±0.06 | 0.69±0.06 | 1.24 |
| C2_1795           | Kynurenine--oxoglutarate transaminase 1                                     | CCBL1    | 0.87±0.07 | 1.06±0.08 | 0.83 |
| C2_5123           | Lactase-phlorizin hydrolase                                                 | LCT      | 0.61±0.14 | 0.28±0.03 | 2.21 |
| C2_17959          | Lactase-phlorizin hydrolase                                                 | LCT      | 0.59±0.15 | 0.26±0.03 | 2.26 |
| C2_380            | Lactoylglutathione lyase                                                    | GLO1     | 0.76±0.11 | 0.52±0.05 | 1.46 |
| C2_4354           | Lambda-crystallin homolog                                                   | CRYL1    | 0.8±0.12  | 0.83±0.05 | 0.97 |
| C2_19670          | Lamin-B2                                                                    | LMNB2    | 0.89±0.06 | 0.72±0.03 | 1.23 |
| C2_23836          | Laminin subunit alpha-3                                                     | LAMA3    | 0.98±0.04 | 0.49±0.03 | 2.00 |
| C2_13399          | LanC-like protein 2                                                         | LANCL2   | 0.76±0.09 | 0.6±0.06  | 1.25 |
| C2_36474          | Lanosterol synthase                                                         | LSS      | 2.16±0.66 | 0.49±0.04 | 4.37 |
| C2_21093          | L-asparaginase                                                              | ASPG     | 0.95±0.05 | 1.32±0.04 | 0.72 |
| C2_141            | Latexin                                                                     | LXN      | 1.2±0.16  | 0.88±0.07 | 1.37 |
| C2_10666          | Lectin                                                                      | LEC      | 0.87±0.07 | 1.91±0.42 | 0.45 |
| C2_65791          | Lethal(2) giant larvae protein homolog 2-like                               | LLGL2    | 0.93±0.03 | 1.23±0.04 | 0.76 |
| C2_15081          | Lethal(2) giant larvae protein homolog 2-like                               | LLGL2    | 0.9±0.03  | 1.09±0.03 | 0.82 |
| C2_18261          | Leucine-rich alpha-2-glycoprotein                                           | LRG1     | 0.9±0.05  | 0.77±0.1  | 1.18 |
| C2_12713          | Leucine-rich repeat protein SHOC-2                                          | SHOC2    | 0.83±0.1  | 0.5±0.07  | 1.66 |
| C2_38024          | Leucyl-tRNA synthetase, cytoplasmic                                         | LARS     | 1.29±0.11 | 1.78±0.02 | 0.73 |
| C2_74310          | Leucyl-tRNA synthetase, cytoplasmic                                         | LARS     | 1.31±0.1  | 1.43±0.07 | 0.91 |
| C2_23571          | Leukocyte cell-derived chemotaxin-2                                         | LECT2    | 1.1±0.32  | 1.01±0.15 | 1.09 |
| C2_2628           | Leukocyte elastase inhibitor                                                | SERPINB1 | 0.79±0.12 | 0.37±0.02 | 2.16 |
| C2_7973           | Leukocyte surface antigen CD53                                              | CD53     | 1.18±0.14 | 0.82±0.05 | 1.44 |
| C2_695            | Leukotriene A-4 hydrolase                                                   | LTA4H    | 0.94±0.05 | 0.28±0.02 | 3.33 |
| C2_109655         | LIM and SH3 domain protein 1                                                | LASP1    | 1.34±0.16 | 1.79±0.11 | 0.75 |
| C2_95063          | Lipid phosphate phosphohydrolase 1                                          | Ppap2a   | 0.89±0.13 | 0.35±0.04 | 2.57 |
| C2_22890          | Lipocalin                                                                   | LCN1     | 1.05±0.03 | 0.88±0.08 | 1.20 |
| C2_80344          | Lipopolysaccharide-responsive and beige-like anchor protein                 | LRBA     | 0.98±0.08 | 1.6±0.11  | 0.62 |
| C2_17285          | Lipopolysaccharide-responsive and beige-like anchor protein                 | LRBA     | 1.04±0.06 | 1.34±0.17 | 0.78 |
| C2_60336          | Lipopolysaccharide-responsive and beige-like anchor protein                 | LRBA     | 1.18±0.09 | 1.4±0.11  | 0.85 |
| C2_22786          | Lipopolysaccharide-responsive and beige-like anchor protein                 | LRBA     | 0.81±0.07 | 0.89±0.07 | 0.90 |
| C2_25312          | Lipopolysaccharide-responsive and beige-like anchor protein                 | LRBA     | 0.97±0.08 | 1.01±0.07 | 0.96 |
| C2_61943          | LisH domain and HEAT repeat-containing protein KIAA1468 homolog             | KIAA1468 | 0.77±0.08 | 0.51±0.03 | 1.49 |
| C2_17725          | Lissencephaly-1 homolog A                                                   | PAFAH1B1 | 1.05±0.04 | 1±0.07    | 1.05 |
| C2_6672           | Liver carboxylesterase                                                      | CES1     | 0.79±0.15 | 0.11±0.01 | 6.93 |

|           |                                                                      |           |           |           |      |
|-----------|----------------------------------------------------------------------|-----------|-----------|-----------|------|
| C2_13242  | Liver carboxylesterase 2                                             | CES1      | 0.63±0.14 | 0.19±0.02 | 3.34 |
| FP338966  | Liver carboxylesterase 22                                            | Ces1e     | 0.71±0.12 | 0.57±0.07 | 1.25 |
| C2_1393   | L-lactate dehydrogenase A chain                                      | LDHA      | 1.59±0.26 | 2.91±0.19 | 0.55 |
| C2_6197   | L-lactate dehydrogenase B chain                                      | LDHB      | 1.26±0.21 | 2.92±0.53 | 0.43 |
| C2_117493 | LON peptidase N-terminal domain and RING finger protein 2            | LONRF2    | 1.04±0.04 | 1.37±0.22 | 0.76 |
| C2_22040  | Long-chain fatty acid transport protein 4                            | SLC27A4   | 1.51±0.2  | 0.64±0.03 | 2.36 |
| C2_12825  | Long-chain specific acyl-CoA dehydrogenase, mitochondrial            | ACADL     | 0.99±0.06 | 0.7±0.03  | 1.42 |
| C2_15955  | Long-chain specific acyl-CoA dehydrogenase, mitochondrial            | ACADL     | 0.93±0.07 | 0.53±0.02 | 1.76 |
| C2_10278  | Long-chain-fatty-acid--CoA ligase 5                                  | ACSL5     | 1.33±0.15 | 1.43±0.09 | 0.93 |
| C2_12320  | Long-chain-fatty-acid--CoA ligase ACSBG2                             | ACSBG2    | 1.13±0.05 | 0.69±0.08 | 1.64 |
| C2_57935  | Low molecular weight phosphotyrosine protein phosphatase             | ACP1      | 1.19±0.12 | 1.24±0.05 | 0.96 |
| C2_18370  | Low-density lipoprotein receptor-related protein 2                   | LRP2      | 0.79±0.07 | 1.63±0.25 | 0.49 |
| C2_8471   | Lumican                                                              | LUM       | 2.13±0.7  | 3.66±0.51 | 0.58 |
| C2_7694   | Lupus La protein homolog B                                           | SSB       | 0.95±0.09 | 2.09±0.34 | 0.45 |
| C2_17468  | L-xylulose reductase                                                 | DCXR      | 0.95±0.03 | 1.29±0.21 | 0.73 |
| C2_29482  | Lymphocyte antigen 75                                                | LY75      | 0.98±0.04 | 0.8±0.04  | 1.23 |
| C2_17901  | Lymphocyte antigen 75                                                | LY75      | 1.06±0.07 | 0.77±0.07 | 1.38 |
| C2_9308   | Lysine-specific demethylase NO66                                     | C14orf169 | 1.02±0.05 | 0.99±0.04 | 1.04 |
| C2_3934   | Lysophosphatidic acid phosphatase type 6                             | ACP6      | 0.75±0.09 | 1.27±0.12 | 0.59 |
| C2_14764  | Lysophospholipase-like protein 1                                     | LYPLAL1   | 0.83±0.12 | 0.76±0.06 | 1.09 |
| C2_2497   | Lysosomal acid phosphatase                                           | ACP2      | 0.76±0.11 | 0.54±0.07 | 1.40 |
| C2_27657  | Lysosomal alpha-mannosidase                                          | MAN2B1    | 1.25±0.24 | 0.89±0.02 | 1.41 |
| C2_6582   | Lysosomal alpha-mannosidase                                          | MAN2B1    | 0.83±0.16 | 0.58±0.06 | 1.42 |
| C2_8076   | Lysosomal protective protein                                         | CTSA      | 0.73±0.12 | 0.46±0.05 | 1.58 |
| C2_2318   | Lysosomal Pro-X carboxypeptidase                                     | PRCP      | 0.69±0.17 | 0.34±0.1  | 2.03 |
| C2_3622   | Lysozyme g                                                           | LYG1      | 2.92±1.14 | 5.86±0.55 | 0.50 |
| C2_3105   | Lysyl-tRNA synthetase                                                | KARS      | 1.7±0.32  | 1.93±0.04 | 0.88 |
| C2_7220   | MACRO domain-containing protein 1                                    | MACROD1   | 1.05±0.1  | 1.08±0.03 | 0.97 |
| C2_439    | Macrophage migration inhibitory factor                               | MIF       | 0.88±0.15 | 0.63±0.07 | 1.39 |
| C2_5305   | Macrophage-capping protein                                           | CAPG      | 1.16±0.13 | 1.35±0.07 | 0.86 |
| C2_121640 | Major histocompatibility complex class I-related gene protein        | MR1       | 0.93±0.03 | 0.86±0.06 | 1.08 |
| C2_72990  | Major vault protein                                                  | MVP       | 2.35±0.62 | 3.76±0.42 | 0.63 |
| C2_11452  | Malate dehydrogenase, cytoplasmic                                    | MDH1      | 2.23±0.53 | 2.53±0.04 | 0.88 |
| C2_612    | Malate dehydrogenase, mitochondrial                                  | MDH2      | 1.21±0.08 | 0.66±0.06 | 1.83 |
| C2_1108   | Malignant T cell-amplified sequence 1-A                              | MCTS1     | 1.55±0.25 | 2.12±0.06 | 0.73 |
| C2_1846   | Maltase-glucoamylase, intestinal                                     | MGAM      | 0.72±0.15 | 0.25±0.03 | 2.91 |
| C2_4465   | Mannose-1-phosphate guanylyltransferase                              | GMPPA     | 0.85±0.06 | 1.06±0.09 | 0.80 |
| C2_3546   | Mannose-1-phosphate guanylyltransferase alpha-A                      | GMPPA     | 1.05±0.06 | 1.17±0.06 | 0.89 |
| C2_23669  | Mannose-1-phosphate guanylyltransferase beta                         | GMPPB     | 0.93±0.03 | 1.23±0.1  | 0.75 |
| C2_19667  | Mannose-6-phosphate isomerase                                        | MPI       | 0.97±0.07 | 0.73±0.02 | 1.34 |
| C2_1921   | Mannose-P-dolichol utilization defect 1 protein                      | MPDU1     | 0.92±0.15 | 0.58±0.05 | 1.59 |
| C2_27538  | Mannosyl-oligosaccharide 1,2-alpha-mannosidase IA                    | MAN1A1    | 1.59±0.28 | 1.05±0.06 | 1.51 |
| C2_3778   | MAU2 chromatid cohesion factor homolog                               | MAU2      | 0.76±0.12 | 0.92±0.12 | 0.82 |
| C2_1554   | Medium-chain specific acyl-CoA dehydrogenase, mitochondrial          | ACADM     | 0.82±0.1  | 0.32±0.04 | 2.55 |
| C2_4129   | Melanotransferrin                                                    | MF12      | 0.67±0.13 | 0.35±0.04 | 1.93 |
| C2_2487   | Membrane-associated progesterone receptor component 1                | PGRMC1    | 0.89±0.08 | 0.5±0.05  | 1.76 |
| C2_1403   | Meprin A subunit alpha                                               | MEP1A     | 0.47±0.18 | 0.33±0.05 | 1.44 |
| C2_5461   | Meprin A subunit beta                                                | MEP1B     | 0.55±0.15 | 0.29±0.04 | 1.88 |
| C2_1481   | Mesoderm-specific transcript homolog protein                         | MEST      | 1.13±0.08 | 0.65±0.1  | 1.75 |
| C2_1799   | Metaxin-2                                                            | MTX2      | 0.79±0.13 | 0.49±0.12 | 1.60 |
| C2_9097   | Methionine aminopeptidase 2                                          | METAP2    | 1.1±0.09  | 1.2±0.08  | 0.92 |
| C2_6737   | Methionyl-tRNA synthetase, cytoplasmic                               | MARS      | 0.96±0.02 | 0.96±0.08 | 1.00 |
| C2_5987   | Methylmalonate-semialdehyde dehydrogenase [acylating], mitochondrial | ALDH6A1   | 1.62±0.3  | 0.62±0.03 | 2.60 |
| C2_45829  | Methylmalonyl-CoA epimerase, mitochondrial                           | MCEE      | 1.56±0.22 | 1.38±0.11 | 1.13 |
| C2_1030   | Microfibril-associated glycoprotein 4                                | MFAP4     | 1.01±0.07 | 0.94±0.07 | 1.08 |
| C2_830    | Microsomal glutathione S-transferase 3                               | MGST3     | 1.42±0.3  | 0.52±0.05 | 2.70 |
| C2_68919  | Microsomal triglyceride transfer protein large subunit               | MTTP      | 2.49±0.57 | 0.95±0.03 | 2.62 |
| C2_7905   | Microsomal triglyceride transfer protein large subunit               | MTTP      | 1.74±0.27 | 0.59±0.02 | 2.92 |
| C2_18367  | Microtubule-associated protein 1B                                    | MAP1B     | 0.84±0.1  | 0.79±0.04 | 1.07 |
| C2_15543  | Microtubule-associated protein RP/EB family member 1                 | MAPRE1    | 1.04±0.09 | 1.66±0.05 | 0.62 |
| C2_8412   | Mitochondrial enolase superfamily member 1                           | ENOSF1    | 0.7±0.1   | 0.98±0.04 | 0.71 |
| C2_198    | Mitochondrial fission 1 protein                                      | FIS1      | 1.37±0.21 | 1.89±0.03 | 0.73 |
| C2_2920   | Mitochondrial import inner membrane translocase subunit Tim13        | TIMM13    | 1.28±0.18 | 0.89±0.1  | 1.43 |
| C2_4825   | Mitochondrial import receptor subunit TOM7 homolog                   | TOMM7     | 1.33±0.35 | 0.63±0.09 | 2.12 |
| C2_658    | Mitochondrial peptide methionine sulfoxide reductase                 | MSRA      | 0.94±0.08 | 0.83±0.06 | 1.14 |
| C2_10488  | Mitogen-activated protein kinase 1                                   | MAPK1     | 1.11±0.09 | 1.64±0.12 | 0.68 |

|           |                                                                      |          |           |           |      |
|-----------|----------------------------------------------------------------------|----------|-----------|-----------|------|
| C2_18375  | Mitogen-activated protein kinase 12                                  | MAPK12   | 0.82±0.12 | 1.2±0.02  | 0.69 |
| C2_3688   | Mitogen-activated protein kinase 14A                                 | MAPK14   | 1±0.09    | 1.68±0.31 | 0.60 |
| C2_96207  | Mitogen-activated protein kinase ERK-A                               | MAPK1    | 1.43±0.27 | 3.1±0.18  | 0.46 |
| C2_2990   | Mitotic checkpoint protein BUB3                                      | BUB3     | 1.05±0.05 | 1.15±0.07 | 0.91 |
| C2_2663   | Mob-like protein phocein                                             | MOB4     | 1.12±0.11 | 0.76±0.03 | 1.47 |
| C2_86     | Moesin                                                               | MSN      | 1.24±0.2  | 1.93±0.04 | 0.64 |
| C2_37874  | Molybdenum cofactor sulfurase                                        | MOCOS    | 0.82±0.09 | 0.82±0.1  | 1.01 |
| C2_11306  | Molybdopterin synthase catalytic subunit                             | MOCS2    | 0.82±0.07 | 0.66±0.07 | 1.24 |
| C2_4226   | Monoacylglycerol lipase ABHD12b                                      | ABHD12b  | 1.37±0.14 | 1.08±0.13 | 1.27 |
| C2_99049  | Monofunctional C1-tetrahydrofolate synthase, mitochondrial           | MTHFD1L  | 1±0.09    | 2.83±0.95 | 0.35 |
| C2_6893   | MOSC domain-containing protein 1, mitochondrial                      | MARC1    | 1.03±0.05 | 0.94±0.08 | 1.09 |
| C2_2814   | Motile sperm domain-containing protein 2                             | MOSPD2   | 1.13±0.06 | 0.73±0.04 | 1.54 |
| C2_19684  | Mps one binder kinase activator-like 1A                              | MOB1A    | 0.71±0.17 | 2.01±0.15 | 0.35 |
| C2_2802   | mRNA cap guanine-N7 methyltransferase                                | RNMT     | 2.24±0.44 | 1.77±0.18 | 1.27 |
| C2_1832   | mRNA export factor                                                   | RAE1     | 1.13±0.06 | 0.78±0.05 | 1.44 |
| C2_33045  | mRNA-decapping enzyme 1A                                             | DCP1A    | 0.92±0.19 | 0.63±0.07 | 1.48 |
| C2_1615   | Mucin-13                                                             | MUC13    | 0.72±0.1  | 0.53±0.06 | 1.35 |
| C2_3396   | Mucin-2                                                              | MUC2     | 0.83±0.1  | 0.98±0.1  | 0.85 |
| C2_22932  | Mucin-2-like                                                         | MUC2     | 1.05±0.14 | 2.15±0.3  | 0.49 |
| C2_40374  | Mucin-5AC                                                            | MUC5AC   | 0.6±0.14  | 0.62±0.09 | 0.98 |
| C2_3786   | Multifunctional protein ADE2                                         | PAICS    | 1.29±0.21 | 1.76±0.15 | 0.73 |
| C2_5717   | Multiple inositol polyphosphate phosphatase 1                        | MINPP1   | 1.28±0.17 | 2.04±0.33 | 0.63 |
| FP338380  | Murinoglobulin-1                                                     | Mug1     | 1.03±0.04 | 1.06±0.2  | 0.96 |
| C2_6452   | Myelin P2 protein                                                    | PMP2     | 1.88±0.39 | 1.97±0.2  | 0.96 |
| C3_c20295 | myelin protein zero-like protein 2-like isoform X2 [Maylandia zebra] | MPZL2    | 1.04±0.08 | 0.93±0.08 | 1.12 |
| C2_11684  | Myosin light chain kinase, smooth muscle                             | MYLK     | 1.24±0.1  | 0.93±0.05 | 1.33 |
| C2_3500   | Myosin light polypeptide 6                                           | MYL6     | 1.77±0.34 | 2.67±0.2  | 0.66 |
| C2_838    | Myosin regulatory light chain 2, smooth muscle minor isoform         | MYL12B   | 1.18±0.08 | 1.13±0.09 | 1.04 |
| C2_25606  | Myosin-10                                                            | MYH10    | 1.2±0.17  | 2.76±0.62 | 0.44 |
| C2_19728  | Myosin-9                                                             | MYH9     | 1.16±0.15 | 2.14±0.24 | 0.54 |
| C2_28126  | Myosin-Ic                                                            | MYO1C    | 2.26±0.94 | 8.68±1.43 | 0.26 |
| C2_62971  | Myosin-Ic                                                            | MYO1C    | 1.4±0.2   | 3.15±0.22 | 0.45 |
| C2_65856  | Myosin-Ic                                                            | MYO1C    | 0.86±0.08 | 1.49±0.13 | 0.58 |
| C2_62194  | Myosin-VI                                                            | MYO6     | 1.59±0.28 | 1.88±0.31 | 0.84 |
| C2_24166  | Myosin-VIIa                                                          | MYO7A    | 1.26±0.11 | 1.45±0.18 | 0.87 |
| C2_11673  | Myosin-VIIb                                                          | MYO7B    | 0.79±0.09 | 1.03±0.09 | 0.77 |
| C2_56371  | Myosin-XV                                                            | MYO15A   | 1.07±0.04 | 1.39±0.13 | 0.77 |
| C2_23167  | Myosin-XV                                                            | MYO15A   | 0.99±0.04 | 1.2±0.05  | 0.82 |
| C2_3970   | Myotrophin                                                           | MTPN     | 0.81±0.11 | 1.14±0.29 | 0.71 |
| C2_4307   | Myotubularin                                                         | MTM1     | 0.77±0.09 | 0.98±0.04 | 0.78 |
| C2_16255  | Myotubularin-related protein 10                                      | MTMR10   | 0.79±0.07 | 1.01±0.21 | 0.78 |
| C2_39243  | Myotubularin-related protein 6                                       | MTMR6    | 0.77±0.09 | 0.75±0.04 | 1.04 |
| C2_8201   | N(4)-(beta-N-acetylglucosaminy)-L-asparaginase                       | AGA      | 0.64±0.13 | 0.48±0.1  | 1.33 |
| C2_21024  | N(G),N(G)-dimethylarginine dimethylaminohydrolase 1                  | DDAH1    | 0.93±0.04 | 0.65±0.05 | 1.41 |
| C2_24043  | Na(+)/H(+) exchange regulatory cofactor NHE-RF1                      | SLC9A3R1 | 1.13±0.05 | 2.43±0.35 | 0.47 |
| C2_3136   | Na(+)/H(+) exchange regulatory cofactor NHE-RF3                      | PDZK1    | 1.21±0.1  | 1.68±0.1  | 0.72 |
| C2_70260  | Na(+)/H(+) exchange regulatory cofactor NHE-RF3                      | PDZK1    | 0.71±0.1  | 0.93±0.07 | 0.77 |
| C2_6312   | N-acetylated-alpha-linked acidic dipeptidase-like protein            | NAALADL1 | 0.75±0.1  | 0.83±0.08 | 0.91 |
| C2_2369   | N-acetyl-D-glucosamine kinase                                        | NAGK     | 0.9±0.12  | 1.12±0.11 | 0.80 |
| C2_14558  | N-acetylgalactosamine kinase                                         | GALK2    | 1.03±0.03 | 3.7±0.92  | 0.28 |
| C2_32023  | N-acetylgalactosaminyltransferase 7                                  | GALNT7   | 1.12±0.07 | 0.66±0.05 | 1.68 |
| C2_11912  | N-acetylneuraminate lyase                                            | NPL      | 0.73±0.11 | 0.72±0.07 | 1.02 |
| C2_11122  | NACHT, LRR and PYD domains-containing protein 12                     | NLRP12   | 0.91±0.13 | 0.67±0.13 | 1.36 |
| C2_105885 | NACHT, LRR and PYD domains-containing protein 3                      | NLRP3    | 4.86±1.62 | 5.31±0.73 | 0.92 |
| C2_117333 | NACHT, LRR and PYD domains-containing protein 6                      | NLRP6    | 0.95±0.08 | 1.07±0.13 | 0.89 |
| C2_14416  | N-acylethanolamine-hydrolyzing acid amidase                          | NAAA     | 0.59±0.14 | 0.49±0.05 | 1.21 |
| C2_1737   | N-acylglucosamine 2-epimerase                                        | RENBP    | 0.95±0.02 | 1.75±0.06 | 0.55 |
| C2_51310  | N-acylneuraminate cytidyltransferase                                 | CMAS     | 0.83±0.1  | 0.38±0.08 | 2.18 |
| C2_13180  | N-acylneuraminate-9-phosphatase                                      | NANP     | 0.94±0.06 | 0.89±0.03 | 1.05 |
| C2_2102   | N-acyl-phosphatidylethanolamine-hydrolyzing phospholipase D          | NAPEPLD  | 0.89±0.05 | 0.64±0.04 | 1.40 |
| C2_4705   | NAD-dependent malic enzyme, mitochondrial                            | ME2      | 1.09±0.05 | 0.62±0.02 | 1.75 |
| C2_5740   | NADH dehydrogenase [ubiquinone] 1 subunit C1, mitochondrial          | NDUFC1   | 1.25±0.1  | 0.8±0.08  | 1.56 |
| C2_357    | NADH-cytochrome b5 reductase 2                                       | CYB5R2   | 1.31±0.13 | 0.66±0.05 | 1.97 |
| C2_568    | NADH-cytochrome b5 reductase 3                                       | Cyb5r3   | 1.69±0.37 | 1.11±0.09 | 1.51 |
| C2_3984   | NADP-dependent malic enzyme                                          | ME1      | 2.25±0.48 | 1.45±0.05 | 1.55 |
| C2_4956   | NADP-dependent malic enzyme, mitochondrial                           | ME3      | 1.75±0.35 | 0.84±0.05 | 2.08 |

|           |                                                                            |          |           |           |      |
|-----------|----------------------------------------------------------------------------|----------|-----------|-----------|------|
| C2_2964   | NADPH--cytochrome P450 reductase                                           | POR      | 1.18±0.07 | 0.58±0.01 | 2.03 |
| C2_9509   | N-alpha-acetyltransferase 38, NatC auxiliary subunit                       | NAA38    | 0.81±0.08 | 0.64±0.1  | 1.26 |
| C2_339    | Nascent polypeptide-associated complex subunit alpha, muscle-specific form | NACA     | 1.54±0.26 | 2.1±0.19  | 0.73 |
| C2_16315  | Natterin-3                                                                 | NATT3    | 0.71±0.1  | 0.65±0.07 | 1.10 |
| C2_41935  | Nck-associated protein 1                                                   | NCKAP1   | 1.2±0.11  | 1.8±0.37  | 0.67 |
| C2_30543  | Nck-associated protein 1                                                   | NCKAP1   | 0.97±0.09 | 0.89±0.02 | 1.09 |
| C2_8636   | NEDD4-like E3 ubiquitin-protein ligase WWP1                                | WWP1     | 1.04±0.11 | 1.19±0.07 | 0.87 |
| C2_3449   | NEDD8-conjugating enzyme UBE2F                                             | UBE2F    | 1.73±0.3  | 3.31±0.53 | 0.52 |
| C2_10265  | Neudesin                                                                   | NENF     | 1.41±0.19 | 1.12±0.16 | 1.26 |
| C3_c46743 | Neural Wiskott-Aldrich syndrome protein                                    | Wasl     | 1.37±0.32 | 3.54±0.2  | 0.39 |
| C2_43416  | Neutral alpha-glucosidase AB                                               | GANAB    | 1.04±0.19 | 0.49±0.03 | 2.11 |
| C2_4237   | Neutral alpha-glucosidase AB                                               | GANAB    | 1±0.11    | 0.45±0.03 | 2.20 |
| C2_4635   | Neutral and basic amino acid transport protein rBAT                        | SLC3A1   | 0.84±0.12 | 0.55±0.05 | 1.51 |
| C2_14365  | Neutral ceramidase                                                         | ASAH2    | 0.69±0.11 | 0.41±0.04 | 1.70 |
| C2_18906  | Neutral ceramidase                                                         | ASAH2    | 0.67±0.11 | 0.31±0.03 | 2.18 |
| C2_1117   | Neutral cholesterol ester hydrolase 1                                      | NCEH1    | 0.71±0.1  | 0.52±0.04 | 1.37 |
| C2_57343  | NFATC2-interacting protein                                                 | NFATC2IP | 1.74±0.27 | 1.06±0.36 | 1.64 |
| C2_26757  | NHL repeat-containing protein 3                                            | NHLRC3   | 0.71±0.12 | 0.57±0.03 | 1.25 |
| C2_2429   | NHP2-like protein 1                                                        | NHP2L1   | 1.06±0.12 | 0.96±0.06 | 1.11 |
| C2_5958   | Nicastrin                                                                  | NCSTN    | 0.94±0.14 | 0.51±0.05 | 1.84 |
| C2_1457   | Nicotinamide phosphoribosyltransferase                                     | NAMPT    | 1.31±0.13 | 1.72±0.42 | 0.76 |
| C2_21618  | Niemann-Pick C1-like protein 1                                             | NPC1L1   | 1.52±0.22 | 1.06±0.09 | 1.43 |
| C2_4414   | Niemann-Pick C1-like protein 1                                             | NPC1L1   | 0.58±0.15 | 0.38±0.07 | 1.50 |
| C2_4636   | NIF3-like protein 1                                                        | CTDSP1   | 0.59±0.14 | 0.32±0.03 | 1.84 |
| C2_22874  | Nitrilase homolog 1                                                        | NIT1     | 0.85±0.06 | 1.21±0.07 | 0.70 |
| C2_781    | N-myc-interactor                                                           | NMI      | 0.75±0.1  | 0.63±0.02 | 1.19 |
| C2_76382  | Nodal modulator 1                                                          | NOMO1    | 0.89±0.1  | 0.42±0.02 | 2.13 |
| C2_75156  | Nodal modulator 2                                                          | NOMO1    | 0.85±0.09 | 0.38±0.03 | 2.25 |
| C2_14786  | Non-lysosomal glucosylceramidase                                           | GBA2     | 1.08±0.07 | 1.04±0.16 | 1.04 |
| C2_183    | Non-specific cytotoxic cell receptor protein 1 homolog                     | NCCRP1   | 0.91±0.14 | 0.43±0.04 | 2.12 |
| C2_121344 | Non-specific lipid-transfer protein                                        | SCP2     | 1.23±0.14 | 1±0.05    | 1.24 |
| C2_1496   | Non-specific lipid-transfer protein                                        | SCP2     | 1.03±0.14 | 0.65±0.07 | 1.57 |
| C2_5466   | NSFL1 cofactor p47                                                         | NSFL1C   | 0.94±0.17 | 0.94±0.04 | 1.00 |
| C2_44175  | Nuclear cap-binding protein subunit 1                                      | NCBP1    | 1.88±0.43 | 3.2±0.28  | 0.59 |
| C2_3542   | Nuclear export mediator factor Nemf                                        | NEMF     | 1.23±0.15 | 1.15±0.09 | 1.07 |
| C2_14783  | Nuclear factor 1 C-type                                                    | NFIC     | 4.11±1.1  | 2.81±0.34 | 1.46 |
| C2_8048   | Nuclear factor 7, brain                                                    | ARNTL2   | 1.95±0.44 | 3.23±0.13 | 0.60 |
| C2_20656  | Nuclear factor 7, ovary                                                    | EEF1A1   | 1.35±0.16 | 1.79±0.04 | 0.76 |
| C2_82048  | Nuclear factor NF-kappa-B p105 subunit                                     | NFKB1    | 0.74±0.09 | 0.91±0.07 | 0.82 |
| C2_1121   | Nuclear migration protein nudC                                             | NUDC     | 0.75±0.09 | 0.78±0.07 | 0.96 |
| C2_25773  | Nuclear pore complex protein Nup54                                         | NUP54    | 0.93±0.04 | 0.82±0.09 | 1.13 |
| C2_6152   | Nuclear pore complex protein Nup85                                         | NUP85    | 1.25±0.11 | 1.16±0.12 | 1.08 |
| C2_14771  | Nuclear pore glycoprotein p62                                              | NUP62    | 0.54±0.15 | 0.44±0.05 | 1.25 |
| C2_10636  | Nuclear protein localization protein 4 homolog                             | NPLOC4   | 1.25±0.15 | 1.39±0.12 | 0.90 |
| C2_9241   | Nuclear receptor-binding protein                                           | NRBP1    | 0.65±0.14 | 0.48±0.05 | 1.34 |
| C2_493    | Nuclear transport factor 2                                                 | NUTF2    | 0.77±0.08 | 0.88±0.15 | 0.88 |
| C2_14540  | Nucleobindin-2                                                             | NUCB2    | 2.38±0.55 | 2.05±0.17 | 1.16 |
| C2_206    | Nucleolar protein 56                                                       | NOP56    | 1.01±0.06 | 0.77±0.07 | 1.31 |
| C2_769    | Nucleolar protein 58                                                       | NOP58    | 1.26±0.17 | 1.56±0.19 | 0.81 |
| C2_9442   | Nucleolin                                                                  | NCL      | 0.86±0.06 | 1.92±0.62 | 0.45 |
| C2_27287  | Nucleolysin TIA-1 isoform p40                                              | TIA1     | 0.83±0.11 | 0.57±0.02 | 1.47 |
| C2_2403   | Nucleophosmin                                                              | NPM1     | 0.91±0.11 | 0.79±0.1  | 1.15 |
| C2_20392  | Nucleoredoxin                                                              | NXN      | 0.82±0.06 | 0.88±0.02 | 0.93 |
| C2_113264 | Nucleoside diphosphate kinase A1                                           | NME1-1   | 1.88±0.43 | 1.59±0.08 | 1.18 |
| C2_1536   | Nucleoside diphosphate kinase B                                            | NME2     | 0.93±0.11 | 0.98±0.1  | 0.94 |
| C2_3380   | Nucleosome assembly protein 1-like 1                                       | NAP1L1   | 0.85±0.07 | 0.59±0.06 | 1.45 |
| C2_19448  | Nucleosome assembly protein 1-like 4                                       | NAP1L4   | 1.08±0.08 | 1.2±0.05  | 0.90 |
| C2_5052   | Obg-like ATPase 1                                                          | OLA1     | 1.08±0.11 | 2.72±1.08 | 0.40 |
| C2_5698   | OCIA domain-containing protein 2                                           | OCIAD2   | 1.56±0.4  | 0.86±0.07 | 1.82 |
| C2_8505   | Olfactomedin-4                                                             | OLFM4    | 0.67±0.12 | 0.42±0.04 | 1.59 |
| C2_604    | Oligoribonuclease, mitochondrial                                           | REXO2    | 2.43±0.88 | 4.58±0.33 | 0.53 |
| C2_5167   | Omega-amidase NIT2                                                         | NIT2     | 1.01±0.05 | 1.06±0.04 | 0.95 |
| C2_6267   | O-phosphoseryl-tRNA(Sec) selenium transferase                              | SEPSECS  | 1.03±0.04 | 1.34±0.02 | 0.76 |
| C2_846    | Osteoclast-stimulating factor 1                                            | OSTF1    | 1.01±0.02 | 1.52±0.33 | 0.66 |
| C2_19895  | Otoraplin                                                                  | OTOR     | 0.97±0.09 | 0.78±0.14 | 1.24 |
| C2_35266  | Oxidoreductase HTATIP2                                                     | HTATIP2  | 1.05±0.06 | 1.24±0.12 | 0.84 |

|           |                                                                              |         |           |           |      |
|-----------|------------------------------------------------------------------------------|---------|-----------|-----------|------|
| C2_6623   | Oxysterol-binding protein-related protein 3                                  | OSBPL3  | 1.05±0.06 | 1.9±0.36  | 0.55 |
| C2_557    | Palmitoyl-protein thioesterase 1                                             | PPT1    | 0.88±0.11 | 0.55±0.07 | 1.60 |
| C2_3526   | Pancreatic alpha-amylase                                                     | AMY2B   | 0.6±0.16  | 0.19±0.04 | 3.17 |
| C2_6860   | Pantothenate kinase 1                                                        | PANK1   | 1.17±0.11 | 1.63±0.11 | 0.72 |
| C2_71084  | Papilin                                                                      | PAPLN   | 2.67±0.97 | 1.32±0.32 | 2.03 |
| C2_119529 | Parvalbumin alpha                                                            | PVALB   | 0.72±0.1  | 0.61±0.07 | 1.18 |
| C2_592    | Parvalbumin beta                                                             | PRVB    | 0.79±0.08 | 1.23±0.26 | 0.64 |
| C2_120726 | Parvalbumin beta 2                                                           | PRVB2   | 0.7±0.11  | 0.69±0.11 | 1.02 |
| C2_50293  | Parvalbumin beta 2                                                           | PRVB2   | 0.72±0.1  | 0.49±0.05 | 1.46 |
| C2_2591   | PCI domain-containing protein 2                                              | PCID2   | 0.94±0.1  | 0.59±0.05 | 1.59 |
| C2_5258   | PDZ and LIM domain protein 1                                                 | PDLIM1  | 2.18±0.51 | 2.53±0.21 | 0.86 |
| C2_6912   | PDZ and LIM domain protein 5                                                 | PDLIM5  | 2.42±0.53 | 1.85±0.23 | 1.31 |
| C2_8807   | PDZ domain-containing protein GIPC1                                          | GIPC1   | 0.89±0.13 | 1.74±0.06 | 0.51 |
| C2_9030   | Pentraxin fusion protein                                                     | PXN1    | 0.83±0.06 | 1±0.16    | 0.83 |
| C2_16238  | Peptide-N(4)-(N-acetyl-beta-D-glucosaminyl)asparagine amidase F              | NGLY1   | 1.41±0.27 | 0.93±0.17 | 1.51 |
| C2_6168   | Peptide-N(4)-(N-acetyl-beta-glucosaminyl)asparagine amidase                  | NGLY1   | 0.96±0.1  | 1.14±0.09 | 0.84 |
| C2_1296   | Peptidyl-prolyl cis-trans isomerase                                          | FKBP4   | 1.89±0.38 | 2.79±0.05 | 0.68 |
| C2_428    | Peptidyl-prolyl cis-trans isomerase                                          | FKBP4   | 1.67±0.26 | 1.6±0.08  | 1.05 |
| C2_1675   | Peptidyl-prolyl cis-trans isomerase B                                        | PPIB    | 2.09±0.53 | 2.23±0.07 | 0.93 |
| C2_13338  | Peptidyl-prolyl cis-trans isomerase D                                        | PPID    | 0.86±0.07 | 0.58±0.04 | 1.48 |
| C2_8702   | Peptidyl-prolyl cis-trans isomerase FKBP1A                                   | FKBP1A  | 1.42±0.27 | 2.16±0.13 | 0.66 |
| C2_472    | Peptidyl-prolyl cis-trans isomerase H                                        | PIIH    | 1.04±0.02 | 0.92±0.12 | 1.13 |
| C2_8872   | Peptidyl-prolyl cis-trans isomerase NIMA-interacting 1                       | PIN1    | 1.73±0.43 | 3.06±0.09 | 0.57 |
| C2_466    | Peroxiredoxin-1                                                              | PRDX1   | 1.01±0.05 | 0.57±0.04 | 1.76 |
| C2_10204  | Peroxiredoxin-2                                                              | PRDX2   | 0.82±0.1  | 0.48±0.02 | 1.70 |
| C2_579    | Peroxiredoxin-4                                                              | PRDX4   | 0.78±0.12 | 0.28±0.03 | 2.77 |
| C2_4821   | Peroxiredoxin-5, mitochondrial                                               | PRDX5   | 1.08±0.1  | 1.55±0.18 | 0.70 |
| C2_199    | Peroxiredoxin-6                                                              | PRDX6   | 1.15±0.13 | 2.8±1.05  | 0.41 |
| C2_8400   | Peroxisomal 2,4-dienoyl-CoA reductase                                        | DECR2   | 1.05±0.05 | 0.77±0.07 | 1.35 |
| C2_62152  | Peroxisomal acyl-coenzyme A oxidase 3                                        | ACOX3   | 2.59±0.57 | 0.58±0.07 | 4.50 |
| C2_30152  | Peroxisomal carnitine O-octanoyltransferase                                  | CROT    | 0.92±0.08 | 0.59±0.02 | 1.55 |
| C2_4577   | Peroxisomal multifunctional enzyme type 2                                    | HSD17B4 | 1.22±0.09 | 0.53±0.03 | 2.32 |
| C2_4281   | Peroxisomal N(1)-acetyl-spermine/spermidine oxidase                          | PAOX    | 1.36±0.17 | 0.88±0.04 | 1.54 |
| C2_9766   | Peroxisomal sarcosine oxidase                                                | PIPOX   | 1.64±0.24 | 0.86±0.06 | 1.91 |
| C2_50894  | Peroxisomal targeting signal 2 receptor                                      | PEX7    | 1.22±0.25 | 1.07±0.24 | 1.15 |
| C2_4069   | Phenazine biosynthesis-like domain-containing protein 1                      | PBLD    | 0.79±0.11 | 0.58±0.05 | 1.36 |
| C2_2121   | Phenylalanyl-tRNA synthetase alpha chain                                     | FARSA   | 1.23±0.25 | 2.19±0.24 | 0.56 |
| C2_2810   | Phenylalanyl-tRNA synthetase beta chain                                      | FARSB   | 1.35±0.15 | 2.26±0.15 | 0.60 |
| C2_931    | Phosducin-like protein 3                                                     | PDCL3   | 1.11±0.08 | 1.46±0.03 | 0.76 |
| C2_3888   | Phosphatidylcholine transfer protein                                         | PCTP    | 0.85±0.09 | 1.29±0.08 | 0.66 |
| C2_14981  | Phosphatidylcholine-sterol acyltransferase                                   | LCAT    | 1±0.06    | 0.86±0.01 | 1.15 |
| C2_99     | Phosphatidylethanolamine-binding protein 1                                   | PEBP1   | 1.7±0.38  | 2.46±0.12 | 0.69 |
| C2_4295   | Phosphatidylinositol phosphatase SAC1-B                                      | SACM1L  | 1.38±0.25 | 0.68±0.05 | 2.03 |
| C2_14866  | Phosphatidylinositol 3-kinase catalytic subunit type 3                       | PIK3C3  | 0.75±0.09 | 0.57±0.03 | 1.32 |
| C2_18561  | Phosphatidylinositol 3-kinase regulatory subunit alpha                       | PIK3R1  | 0.75±0.12 | 0.86±0.16 | 0.87 |
| C2_1495   | Phosphatidylinositol transfer protein alpha isoform                          | PITPNA  | 1.58±0.26 | 3.96±0.62 | 0.40 |
| C2_5143   | Phosphatidylinositol-4-phosphate 3-kinase C2 domain-containing subunit alpha | PIK3C2A | 1.04±0.15 | 1.54±0.41 | 0.67 |
| C2_8586   | Phosphatidylinositol-binding clathrin assembly protein                       | PICALM  | 0.84±0.05 | 0.77±0.03 | 1.10 |
| C2_19167  | Phosphoacetylglucosamine mutase                                              | PGM3    | 1.61±0.26 | 1.68±0.13 | 0.96 |
| C2_12073  | Phosphoenolpyruvate carboxykinase [GTP], mitochondrial                       | PCK2    | 1.82±0.33 | 0.68±0.03 | 2.67 |
| C2_371    | Phosphoglucomutase-1                                                         | PGM1    | 1.31±0.26 | 1.25±0.17 | 1.05 |
| C2_6725   | Phosphoglucomutase-2                                                         | PGM2    | 0.88±0.04 | 0.83±0.07 | 1.06 |
| C2_12228  | Phosphoglucomutase-like protein 5                                            | PGM5    | 0.98±0.02 | 0.94±0.11 | 1.04 |
| C2_1379   | Phosphoglycerate kinase 1                                                    | PGK1    | 0.96±0.03 | 0.94±0.05 | 1.02 |
| C2_2366   | Phosphoglycerate mutase 1                                                    | PGAM1   | 1.27±0.18 | 2.69±0.1  | 0.47 |
| C2_101    | Phosphoglycerate mutase 2                                                    | PGAM2   | 0.73±0.1  | 0.75±0.12 | 0.97 |
| C2_1462   | Phospholipase A2 group 1B                                                    | PLA2G1B | 1.11±0.05 | 5.78±0.69 | 0.19 |
| C2_40269  | Phospholipase A-2-activating protein                                         | PLAA    | 0.75±0.12 | 0.42±0.04 | 1.78 |
| C2_24128  | Phospholipase B1, membrane-associated                                        | PLB1    | 0.88±0.05 | 1.88±0.19 | 0.47 |
| C2_12635  | Phospholipase B1, membrane-associated                                        | PLB1    | 0.84±0.06 | 1.4±0.17  | 0.60 |
| C3_c15747 | Phospholipase B1, membrane-associated                                        | PLB1    | 0.67±0.11 | 0.44±0.02 | 1.52 |
| C2_4374   | Phospholipase B-like 1                                                       | PLBD1   | 0.78±0.11 | 0.58±0.04 | 1.34 |
| C2_85     | Phospholipid hydroperoxide glutathione peroxidase, mitochondrial             | GPX4    | 0.75±0.11 | 0.26±0.01 | 2.91 |
| C2_45244  | Phospholipid transfer protein                                                | PLTP    | 1.05±0.13 | 0.81±0.18 | 1.29 |
| C2_1982   | Phosphomannomutase 2                                                         | PMM2    | 1.03±0.05 | 0.77±0.05 | 1.33 |

|           |                                                             |          |           |           |      |
|-----------|-------------------------------------------------------------|----------|-----------|-----------|------|
| C2_2665   | Phosphopantothenate--cysteine ligase                        | PPCS     | 0.91±0.06 | 1.42±0.09 | 0.64 |
| C2_1196   | Phosphopantothenoylcysteine decarboxylase                   | PPCDC    | 0.87±0.04 | 0.86±0.07 | 1.01 |
| C2_20987  | Phosphoribosyl pyrophosphate synthase-associated protein 1  | PRPSAP1  | 0.89±0.17 | 1±0.1     | 0.89 |
| C2_19159  | Phosphotriesterase-related protein                          | PTER     | 0.72±0.13 | 0.66±0.06 | 1.09 |
| C2_31716  | Phytanoyl-CoA dioxygenase domain-containing protein 1       | PHYHD1   | 1.03±0.05 | 2.16±0.36 | 0.48 |
| C2_7139   | PITH domain-containing protein 1                            | PITHD1   | 0.78±0.12 | 0.58±0.05 | 1.34 |
| C2_13726  | Plakophilin-3                                               | PKP3     | 1.02±0.06 | 1.93±0.78 | 0.53 |
| C2_3079   | Plasma kallikrein                                           | KLKB1    | 1.23±0.23 | 1.25±0.07 | 0.98 |
| C2_13716  | Plasma membrane calcium-transporting ATPase 1               | ATP2B1   | 1.47±0.18 | 2.35±0.16 | 0.62 |
| C2_23687  | Plasma protease C1 inhibitor                                | SERPING1 | 0.94±0.07 | 1.08±0.2  | 0.88 |
| C2_26329  | Plasma protease C1 inhibitor                                | SERPING1 | 0.97±0.09 | 0.99±0.18 | 0.99 |
| C2_4248   | Plastin-1                                                   | PLS1     | 1.3±0.15  | 2.46±0.13 | 0.53 |
| C2_952    | Plastin-2                                                   | LCP1     | 0.99±0.05 | 1±0.09    | 0.99 |
| C2_6788   | Plastin-3                                                   | PLS3     | 0.78±0.09 | 0.6±0.04  | 1.29 |
| C2_5230   | Platelet glycoprotein 4                                     | CD36     | 0.66±0.13 | 0.35±0.04 | 1.88 |
| C2_10874  | Platelet glycoprotein Ib alpha chain                        | GP1BA    | 1.49±0.19 | 1.47±0.23 | 1.01 |
| C2_10639  | Platelet-activating factor acetylhydrolase                  | PLA2G7   | 1.51±0.23 | 1.18±0.07 | 1.28 |
| C2_2316   | Platelet-activating factor acetylhydrolase IB subunit gamma | PAFAH1B3 | 1.07±0.05 | 1.32±0.11 | 0.81 |
| C2_21485  | Plectin                                                     | PLEC     | 0.94±0.04 | 1.08±0.06 | 0.87 |
| C2_3910   | Plectin                                                     | PLEC     | 1.09±0.14 | 1.02±0.09 | 1.07 |
| C3_c26450 | Plectin                                                     | PLEC     | 0.87±0.05 | 0.68±0.11 | 1.27 |
| C2_13614  | Plectin                                                     | PLEC     | 0.9±0.13  | 0.69±0.02 | 1.31 |
| C3_c30637 | Plectin                                                     | PLEC     | 0.99±0.09 | 0.59±0.02 | 1.69 |
| C2_16967  | Plectin                                                     | PLEC     | 1.43±0.26 | 0.57±0.06 | 2.50 |
| C2_2925   | Pleiotropic regulator 1                                     | PLRG1    | 0.84±0.11 | 0.54±0.06 | 1.57 |
| C2_11515  | Poly [ADP-ribose] polymerase 1                              | PARP1    | 1.33±0.15 | 1.47±0.05 | 0.90 |
| C2_25980  | Poly [ADP-ribose] polymerase 1                              | PARP1    | 0.78±0.1  | 0.8±0.1   | 0.97 |
| C2_33629  | Poly [ADP-ribose] polymerase 10                             | PARP10   | 0.94±0.08 | 0.65±0.08 | 1.46 |
| C2_4201   | Poly [ADP-ribose] polymerase 3                              | PARP3    | 0.76±0.09 | 0.82±0.11 | 0.93 |
| C2_18821  | Poly [ADP-ribose] polymerase 9                              | PARP9    | 0.83±0.09 | 0.81±0.1  | 1.02 |
| C2_38350  | Poly(ADP-ribose) glycohydrolase ARH3                        | ADPRHL2  | 0.99±0.02 | 0.9±0.04  | 1.09 |
| C2_4828   | Poly(rC)-binding protein 2                                  | PCBP2    | 1.49±0.2  | 3.19±0.6  | 0.47 |
| C2_2960   | Poly(U)-binding-splicing factor PUF60                       | PUF60    | 0.78±0.08 | 0.61±0.06 | 1.27 |
| C2_54396  | Poly(U)-binding-splicing factor PUF60-B                     | PUF60-B  | 0.87±0.05 | 0.86±0.05 | 1.02 |
| C2_6459   | Poly(U)-specific endoribonuclease                           | ENDOU    | 0.59±0.14 | 0.4±0.05  | 1.48 |
| C2_3168   | Polyadenylate-binding protein 1                             | PABPC1   | 1.03±0.17 | 1.77±0.24 | 0.58 |
| C2_12680  | Polyadenylate-binding protein 2                             | PABPN1   | 0.99±0.03 | 0.93±0.05 | 1.07 |
| C2_9708   | Polypeptide N-acetylgalactosaminyltransferase 6             | GALNT6   | 0.91±0.05 | 0.55±0.03 | 1.65 |
| C2_8361   | Polypyrimidine tract-binding protein 1                      | PTBP1    | 1.1±0.12  | 1.54±0.09 | 0.72 |
| C2_3549   | Polypyrimidine tract-binding protein 2                      | PTBP2    | 1.48±0.19 | 3.43±0.46 | 0.43 |
| C2_6689   | Polysaccharase-2                                            | PRSS36   | 0.39±0.2  | 0.76±0.16 | 0.51 |
| C2_4566   | Porphobilinogen deaminase                                   | HMBS     | 1.09±0.07 | 1.07±0.04 | 1.02 |
| C2_1110   | Prefoldin subunit 1                                         | PFDN1    | 0.78±0.08 | 1.25±0.17 | 0.62 |
| C2_653    | Prefoldin subunit 2                                         | PFDN2    | 0.96±0.03 | 1.46±0.24 | 0.66 |
| C2_120921 | Prefoldin subunit 3                                         | VBP1     | 0.98±0.03 | 1.23±0.07 | 0.80 |
| C2_4841   | Prefoldin subunit 4                                         | PFDN4    | 1.61±0.42 | 3.05±0.41 | 0.53 |
| C2_473    | Prefoldin subunit 5                                         | PFDN5    | 1.11±0.08 | 1.27±0.04 | 0.87 |
| C2_41817  | Pregnancy zone protein                                      | PZP      | 0.87±0.07 | 0.88±0.15 | 0.99 |
| C2_17370  | Pregnancy-specific beta-1-glycoprotein 8                    | PSG8     | 0.72±0.12 | 0.84±0.09 | 0.85 |
| C2_17155  | Prelamin-A/C                                                | LMNA     | 1.18±0.2  | 1.24±0.21 | 0.95 |
| C2_3804   | Pre-mRNA-processing factor 39                               | PRPF39   | 1.22±0.15 | 1.74±0.17 | 0.70 |
| C2_15123  | Pre-mRNA-processing-splicing factor 8                       | PRPF8    | 1.25±0.13 | 1.5±0.12  | 0.83 |
| C2_9221   | Proactivator polypeptide                                    | PSAPL1   | 1.02±0.13 | 0.56±0.09 | 1.84 |
| C2_22286  | Probable 2-ketogluconate reductase                          | tkrA     | 1.22±0.12 | 1.79±0.29 | 0.68 |
| C2_18944  | Probable 4-hydroxy-2-oxoglutarate aldolase, mitochondrial   | HOGA1    | 0.71±0.1  | 0.59±0.08 | 1.20 |
| C2_1677   | Probable acyl coa dehydrogenase 6                           | acdh-6   | 1.21±0.08 | 1.06±0.06 | 1.14 |
| C2_1682   | Probable aminopeptidase NPEPL1                              | NPEPL1   | 0.78±0.13 | 0.57±0.05 | 1.37 |
| C2_8194   | Probable arylformamidase                                    | FP0207   | 1.02±0.03 | 1.69±0.03 | 0.60 |
| C2_68498  | Probable ATP-dependent helicase lhr                         | TMBIM6   | 1.43±0.29 | 1.51±0.22 | 0.94 |
| C2_2903   | Probable ATP-dependent RNA helicase DDX23                   | DDX23    | 1.13±0.18 | 1.7±0.2   | 0.67 |
| C2_2745   | Probable ATP-dependent RNA helicase ddx6                    | DDX6     | 0.97±0.02 | 1.28±0.06 | 0.76 |
| C2_4290   | Probable carboxypeptidase PM20D1.2                          | PM20D1   | 0.84±0.09 | 0.55±0.02 | 1.54 |
| C2_26495  | Probable D-tyrosyl-tRNA(Tyr) deacylase 2                    | DTD2     | 1.08±0.06 | 1.06±0.06 | 1.02 |
| C2_64430  | Probable E3 ubiquitin-protein ligase MYCBP2                 | MYCB2    | 1.01±0.1  | 0.7±0.26  | 1.45 |
| C2_13444  | Probable E3 ubiquitin-protein ligase TRIP12                 | TRIP12   | 0.94±0.06 | 0.89±0.07 | 1.06 |
| C2_6533   | Probable ergosterol biosynthetic protein 28                 | C14orf1  | 1.59±0.21 | 1.24±0.15 | 1.28 |
| C2_31924  | Probable hydrolase PNKD                                     | PNKD     | 0.96±0.1  | 0.76±0.07 | 1.26 |



|           |                                                                     |          |           |           |      |
|-----------|---------------------------------------------------------------------|----------|-----------|-----------|------|
| C2_1359   | Probable methylthioribulose-1-phosphate dehydratase                 | mtnAB    | 0.82±0.11 | 0.51±0.05 | 1.61 |
| C2_20669  | Probable peptidyl-tRNA hydrolase 2                                  | pth2     | 0.86±0.1  | 0.69±0.04 | 1.25 |
| C2_25307  | Probable protein BRICK1                                             | BRK1     | 0.91±0.14 | 2.11±0.37 | 0.43 |
| C2_1150   | Probable serine carboxypeptidase CPVL                               | CPVL     | 0.77±0.13 | 0.86±0.17 | 0.90 |
| C2_242    | Probable signal peptidase complex subunit 2                         | SPCS2    | 1.22±0.11 | 0.76±0.11 | 1.61 |
| C2_11771  | Probable thiopurine S-methyltransferase                             | TPMT     | 1.44±0.18 | 2.27±0.07 | 0.63 |
| C2_8372   | Probable threonyl-tRNA synthetase 2, cytoplasmic                    | TARSL2   | 1.26±0.1  | 1.13±0.03 | 1.11 |
| C2_1594   | Probable tRNA threonylcarbamoyladenosine biosynthesis protein osgep | OSGEPL1  | 1.06±0.06 | 1.82±0.29 | 0.58 |
| C2_29865  | Probable ubiquitin carboxyl-terminal hydrolase FAF-X                | USP9X    | 1.36±0.17 | 1.9±0.19  | 0.72 |
| C2_9255   | Probable uridine nucleosidase 1                                     | URH1     | 0.63±0.13 | 0.32±0.03 | 1.94 |
| C2_7946   | Profilin-2                                                          | PFN2     | 0.76±0.1  | 0.48±0.05 | 1.59 |
| C2_22586  | Programmed cell death 6-interacting protein                         | PDCD6IP  | 1.44±0.28 | 2.42±0.15 | 0.59 |
| C2_20093  | Programmed cell death protein 4                                     | PDCD4    | 1.37±0.14 | 1.77±0.29 | 0.77 |
| C2_576    | Programmed cell death protein 6                                     | PDCD6    | 1.09±0.03 | 0.94±0.11 | 1.16 |
| C2_285    | Prohibitin                                                          | PHB      | 1.28±0.27 | 0.37±0.07 | 3.43 |
| C2_1796   | Prolactin regulatory element-binding protein                        | PREB     | 1.13±0.15 | 0.47±0.05 | 2.39 |
| C2_228    | Proliferating cell nuclear antigen                                  | PCNA     | 0.8±0.07  | 0.55±0.05 | 1.46 |
| C2_447    | Proliferation-associated protein 2G4                                | PA2G4    | 1.36±0.22 | 1.61±0.07 | 0.85 |
| C2_816    | Proline synthase co-transcribed bacterial homolog protein           | PROSC    | 1.43±0.21 | 1.5±0.05  | 0.95 |
| C2_35352  | Prolyl endopeptidase                                                | PREP     | 0.98±0.05 | 0.78±0.06 | 1.26 |
| C2_19946  | Prolyl endopeptidase                                                | PREP     | 0.78±0.08 | 0.57±0.06 | 1.36 |
| C2_45784  | Prominin-1                                                          | PROM1    | 1.91±0.44 | 5.11±0.1  | 0.37 |
| C2_6056   | Propionyl-CoA carboxylase beta chain, mitochondrial                 | PCCB     | 0.61±0.14 | 0.65±0.09 | 0.94 |
| C2_18955  | Prostaglandin E synthase 2                                          | PTGES2   | 0.96±0.06 | 0.77±0.05 | 1.24 |
| C2_340    | Prostaglandin E synthase 3                                          | PTGES3   | 0.79±0.07 | 0.61±0.05 | 1.29 |
| C2_69618  | Prostaglandin reductase 1                                           | PTGR1    | 1.8±0.37  | 0.56±0.04 | 3.22 |
| C2_40152  | Prostaglandin reductase 2                                           | PTGR2    | 0.9±0.08  | 1.09±0.17 | 0.82 |
| C2_6696   | Prostaglandin-H2 D-isomerase                                        | PTGDS    | 0.93±0.05 | 1.02±0.05 | 0.91 |
| C2_4229   | Prostamide/prostaglandin F synthase                                 | FAM213B  | 1.04±0.05 | 1.76±0.21 | 0.59 |
| C2_2509   | Prostasin                                                           | PRSS8    | 0.37±0.21 | 0.71±0.2  | 0.52 |
| C2_62037  | Proteasomal ubiquitin receptor ADRM1                                | ADRM1    | 1.38±0.25 | 2.29±0.12 | 0.60 |
| C2_19056  | Proteasome activator complex subunit 1                              | PSME1    | 1.14±0.11 | 2.24±0.81 | 0.51 |
| C2_52053  | Proteasome activator complex subunit 2                              | PSME2    | 1.44±0.22 | 2.41±0.57 | 0.59 |
| C2_8230   | Proteasome assembly chaperone 2                                     | PSMG2    | 0.57±0.17 | 0.49±0.08 | 1.17 |
| C2_1050   | Proteasome assembly chaperone 3                                     | PSMG3    | 1.09±0.04 | 1.63±0.07 | 0.67 |
| C2_276    | Proteasome subunit alpha type-1                                     | PSMA1    | 0.8±0.11  | 0.41±0.05 | 1.97 |
| C2_39253  | Proteasome subunit alpha type-2                                     | PSMA2    | 0.85±0.11 | 0.43±0.05 | 1.99 |
| C2_667    | Proteasome subunit alpha type-3                                     | PSMA3    | 0.84±0.14 | 0.38±0.05 | 2.17 |
| C2_1506   | Proteasome subunit alpha type-4                                     | PSMA4    | 0.8±0.13  | 0.41±0.04 | 1.96 |
| C2_89     | Proteasome subunit alpha type-5                                     | PSMA5    | 0.77±0.12 | 0.37±0.03 | 2.07 |
| C2_979    | Proteasome subunit alpha type-6                                     | PSMA6    | 0.78±0.1  | 0.47±0.05 | 1.67 |
| C2_486    | Proteasome subunit alpha type-7                                     | PSMA7    | 0.82±0.12 | 0.43±0.02 | 1.89 |
| C2_303    | Proteasome subunit beta type-1-B                                    | PSMA1    | 0.79±0.11 | 0.41±0.05 | 1.94 |
| C2_4220   | Proteasome subunit beta type-2                                      | PSMB2    | 0.8±0.12  | 0.43±0.04 | 1.87 |
| C2_1113   | Proteasome subunit beta type-3                                      | PSMB3    | 0.89±0.16 | 0.43±0.05 | 2.07 |
| C2_1989   | Proteasome subunit beta type-4                                      | PSMB4    | 0.84±0.14 | 0.41±0.04 | 2.04 |
| C2_2719   | Proteasome subunit beta type-5                                      | PSMB5    | 0.93±0.09 | 0.58±0.04 | 1.62 |
| C2_43253  | Proteasome subunit beta type-6                                      | PSMB6    | 1.12±0.11 | 0.59±0.07 | 1.88 |
| C2_104936 | Proteasome subunit beta type-6-B like protein                       | PSMB6L-B | 0.83±0.1  | 0.52±0.04 | 1.59 |
| C2_909    | Proteasome subunit beta type-7                                      | PSMB7    | 1.11±0.1  | 0.94±0.08 | 1.19 |
| C2_21676  | Proteasome subunit beta type-8                                      | PSMB8    | 0.69±0.12 | 0.56±0.07 | 1.24 |
| C2_121103 | Proteasome subunit beta type-9                                      | PSMB9    | 0.82±0.1  | 0.48±0.04 | 1.71 |
| C2_2075   | Protein archease                                                    | ZBTB8OS  | 1.04±0.04 | 1.08±0.07 | 0.96 |
| C2_2985   | Protein arginine N-methyltransferase 1                              | PRMT1    | 1.75±0.28 | 1.6±0.12  | 1.09 |
| C2_5961   | Protein argonaute-2                                                 | AGO2     | 1.16±0.1  | 1.58±0.11 | 0.73 |
| C2_247    | Protein C17orf37 homolog                                            | MIEN1    | 0.67±0.12 | 0.5±0.05  | 1.35 |
| C2_1344   | Protein Churchill                                                   | CHURC1   | 0.79±0.07 | 0.63±0.04 | 1.24 |
| C2_2192   | Protein cornichon homolog 4                                         | CNIH4    | 0.88±0.08 | 0.65±0.06 | 1.35 |
| C2_17089  | Protein diaphanous homolog 1                                        | DIAPH1   | 0.94±0.03 | 1.1±0.06  | 0.85 |
| C2_17097  | Protein diaphanous homolog 1                                        | DIAPH1   | 0.82±0.1  | 0.31±0.01 | 2.61 |
| C2_3894   | Protein disulfide-isomerase                                         | P4HB     | 1.57±0.2  | 0.46±0.03 | 3.43 |
| C2_251    | Protein disulfide-isomerase A3                                      | PDIA3    | 1.39±0.17 | 0.53±0.06 | 2.61 |
| C2_2492   | Protein disulfide-isomerase A4                                      | PDIA4    | 1.26±0.11 | 0.6±0.04  | 2.11 |
| C2_10370  | Protein disulfide-isomerase A6                                      | PDIA6    | 1.36±0.14 | 0.89±0.02 | 1.54 |
| C3_c46794 | protein disulfide-isomerase-like [Oryzias latipes]                  | P4HB     | 1.55±0.19 | 0.44±0.08 | 3.55 |
| C2_229    | Protein DJ-1                                                        | PARK7    | 1.03±0.04 | 2.03±0.1  | 0.50 |

|           |                                                                            |           |           |           |      |
|-----------|----------------------------------------------------------------------------|-----------|-----------|-----------|------|
| C2_18250  | Protein dopey-2                                                            | DOPEY2    | 0.69±0.12 | 0.94±0.11 | 0.73 |
| C2_25777  | Protein dpy-30 homolog                                                     | DPY30     | 1.19±0.17 | 1.96±0.17 | 0.61 |
| C2_3442   | Protein EFR3 homolog A                                                     | EFR3A     | 1.43±0.2  | 2.1±0.34  | 0.68 |
| C2_3833   | Protein ERGIC-53                                                           | LMAN1     | 1.07±0.06 | 0.83±0.05 | 1.29 |
| C2_1216   | Protein ETHE1, mitochondrial                                               | ETHE1     | 1.27±0.11 | 2.05±0.18 | 0.62 |
| C2_41607  | Protein FAM115                                                             | FAM115C   | 1.15±0.08 | 0.91±0.14 | 1.26 |
| C2_6080   | Protein FAM115                                                             | FAM115C   | 0.83±0.13 | 0.57±0.03 | 1.46 |
| C2_6182   | Protein FAM151A                                                            | FAM151A   | 0.71±0.11 | 0.62±0.09 | 1.15 |
| C2_6067   | Protein FAM203A                                                            | HGH1      | 0.87±0.05 | 0.97±0.05 | 0.90 |
| C2_9945   | Protein FAM45A                                                             | FAM45A    | 0.98±0.2  | 1.14±0.39 | 0.86 |
| C2_1887   | Protein FAM49B                                                             | FAM49B    | 0.98±0.05 | 1.74±0.29 | 0.56 |
| C2_11022  | Protein farnesyltransferase subunit beta                                   | FNTB      | 1.53±0.27 | 1.65±0.08 | 0.93 |
| C2_1062   | Protein farnesyltransferase/geranylgeranyltransferase type-1 subunit alpha | FNTA      | 0.98±0.02 | 0.96±0.03 | 1.02 |
| C2_18576  | Protein flightless-1 homolog                                               | FLII      | 0.67±0.11 | 0.62±0.02 | 1.09 |
| C2_2924   | Protein HEG homolog 1                                                      | HEG1      | 0.85±0.05 | 1.17±0.04 | 0.73 |
| C2_25893  | Protein KHNYN                                                              | KHNYN     | 1.35±0.17 | 1.54±0.15 | 0.88 |
| C2_28019  | Protein kinase C and casein kinase substrate in neurons protein 1          | PACSIN1   | 1.92±0.51 | 2.2±0.15  | 0.87 |
| C2_2899   | Protein kish-A                                                             | TMEM167A  | 1.1±0.05  | 1.25±0.2  | 0.88 |
| C2_46645  | Protein LAP2                                                               | ERBB2IP   | 0.88±0.06 | 1.03±0.1  | 0.85 |
| C2_32269  | Protein LAP2                                                               | ERBB2IP   | 1.06±0.07 | 1.2±0.07  | 0.89 |
| C2_158    | Protein LSM12 homolog A                                                    | LSM12     | 1.35±0.77 | 1.55±0.51 | 0.87 |
| C2_24702  | Protein mago nashi homolog 2                                               | MAGOHB    | 1.63±0.24 | 1.41±0.08 | 1.16 |
| C2_11790  | Protein MEMO1                                                              | MEMO1     | 0.82±0.06 | 0.72±0.04 | 1.14 |
| C2_20871  | Protein MON2 homolog                                                       | MON2      | 1.16±0.15 | 1.89±0.07 | 0.61 |
| C2_1083   | Protein NDRG1                                                              | NDRG1     | 1.37±0.21 | 1.48±0.14 | 0.93 |
| C2_2272   | Protein NipSnap homolog 3A                                                 | NIPSNAP3A | 1.08±0.04 | 0.68±0.05 | 1.58 |
| C2_4429   | Protein N-terminal asparagine amidohydrolase                               | NTAN1     | 0.99±0.01 | 0.77±0.03 | 1.28 |
| C2_1971   | Protein phosphatase 1 regulatory subunit 7                                 | PPP1R7    | 1±0.06    | 1.18±0.04 | 0.85 |
| C2_8910   | Protein phosphatase 1A                                                     | PPM1A     | 1.17±0.17 | 1.96±0.39 | 0.60 |
| C2_4186   | Protein phosphatase Slingshot homolog                                      | SSH1      | 0.97±0.05 | 0.92±0.05 | 1.05 |
| C2_52239  | Protein PRRC1                                                              | PRRC1     | 1.04±0.06 | 0.82±0.03 | 1.27 |
| C2_8306   | Protein prune homolog                                                      | PRUNE     | 0.89±0.12 | 1.37±0.08 | 0.65 |
| C2_2956   | Protein RER1                                                               | RER1      | 1.05±0.07 | 0.62±0.02 | 1.71 |
| C2_47184  | Protein rogdi homolog                                                      | ROGDI     | 0.71±0.12 | 0.73±0.07 | 0.97 |
| C2_10121  | Protein RUFY3                                                              | RUFY3     | 0.88±0.09 | 1.38±0.29 | 0.64 |
| C2_1280   | Protein S100-A10                                                           | S100A10   | 1.78±0.58 | 2.8±0.64  | 0.64 |
| C2_19606  | Protein S100-A14                                                           | S100A14   | 0.74±0.09 | 0.65±0.04 | 1.13 |
| C2_111465 | Protein S100-P                                                             | S100P     | 1.32±0.14 | 1.16±0.1  | 1.15 |
| C2_4144   | Protein SEC13 homolog                                                      | SEC13     | 0.8±0.07  | 0.36±0.04 | 2.21 |
| C2_8005   | Protein SET                                                                | SET       | 0.84±0.07 | 0.6±0.05  | 1.39 |
| C2_3704   | Protein TEX261                                                             | TEX261    | 2.03±0.6  | 0.75±0.1  | 2.72 |
| C2_90346  | Protein translation factor SUI1 homolog                                    | EIF1      | 1.14±0.19 | 1±0.15    | 1.14 |
| C2_15806  | Protein transport protein Sec23A                                           | SEC23A    | 0.76±0.12 | 0.75±0.06 | 1.01 |
| C2_43443  | Protein transport protein Sec23B                                           | SEC23B    | 1.01±0.05 | 1.31±0.04 | 0.77 |
| C2_7030   | Protein transport protein Sec24A                                           | SEC24A    | 3.82±1.1  | 4.22±0.43 | 0.90 |
| C3_c55819 | Protein transport protein Sec24C                                           | SEC24C    | 1.48±0.23 | 1.31±0.14 | 1.13 |
| C2_40599  | Protein transport protein Sec24C                                           | SEC24C    | 1.03±0.08 | 0.82±0.13 | 1.26 |
| C2_35803  | Protein transport protein Sec31A                                           | SEC31A    | 1.32±0.15 | 2.35±0.15 | 0.56 |
| C2_45211  | Protein transport protein Sec31A                                           | SEC31A    | 0.91±0.1  | 0.95±0.07 | 0.96 |
| C2_324    | Protein transport protein Sec61 subunit alpha-like 1                       | SEC61A1   | 1.47±0.22 | 0.93±0.08 | 1.58 |
| C2_6339   | Protein tyrosine phosphatase type IVA 2                                    | PTP4A2    | 1.38±0.16 | 0.9±0.08  | 1.53 |
| C2_7880   | Protein XRP2                                                               | RP2       | 0.82±0.08 | 0.92±0.05 | 0.90 |
| C2_6352   | Protein Z-dependent protease inhibitor                                     | SERPINA10 | 0.8±0.07  | 0.67±0.06 | 1.19 |
| C3_c12027 | Protein zer-1 homolog                                                      | ZER1      | 1.36±0.2  | 1.45±0.19 | 0.94 |
| C2_36307  | Protein zyg-11 homolog                                                     | ZYG11B    | 1.27±0.18 | 1.75±0.1  | 0.73 |
| C2_13589  | Protein-arginine deiminase type-2                                          | PADI2     | 1.19±0.07 | 1.63±0.15 | 0.73 |
| C2_39921  | Protein-glutamine gamma-glutamyltransferase 2                              | TGM2      | 0.76±0.1  | 0.73±0.02 | 1.05 |
| C2_13897  | Proteoglycan 4                                                             | Prg4      | 1.07±0.03 | 1.03±0.34 | 1.04 |
| C2_31468  | Prothrombin                                                                | F2        | 1±0.05    | 1.7±0.58  | 0.59 |
| C2_16527  | Prothrombin                                                                | F2        | 1.17±0.09 | 1.55±0.43 | 0.76 |
| C2_67727  | Protocadherin Fat 3                                                        | FAT3      | 0.54±0.16 | 0.47±0.05 | 1.13 |
| C2_13732  | Protocadherin-like wing polarity protein stan                              | CELSR1    | 0.64±0.12 | 0.53±0.06 | 1.20 |
| C2_7122   | Pseudouridine-5'-monophosphatase                                           | HDHD1     | 1.17±0.11 | 1.18±0.04 | 1.00 |
| C2_16519  | Pterin-4-alpha-carbinolamine dehydratase                                   | PCBD1     | 0.8±0.09  | 1.09±0.01 | 0.74 |
| C2_9779   | Pterin-4-alpha-carbinolamine dehydratase 2                                 | PCBD2     | 1.93±0.34 | 3.31±0.36 | 0.58 |
| C2_21104  | Puromycin-sensitive aminopeptidase                                         | NPEPPS    | 0.81±0.09 | 0.75±0.06 | 1.08 |

|           |                                                                                |              |           |           |      |
|-----------|--------------------------------------------------------------------------------|--------------|-----------|-----------|------|
| C2_102229 | Putative 60S ribosomal protein L37a                                            | Rpl37a-ps1   | 1.71±0.29 | 1.15±0.05 | 1.49 |
| C2_23472  | Putative acyl-CoA dehydrogenase AidB                                           | AIDB         | 0.94±0.05 | 0.58±0.07 | 1.62 |
| C2_18767  | Putative adenosylhomocysteinase 2                                              | AHCYL1       | 1.13±0.05 | 1.49±0.14 | 0.76 |
| C2_1163   | Putative adenosylhomocysteinase 3                                              | AHCYL2       | 1.25±0.14 | 1.56±0.43 | 0.81 |
| C2_3029   | Putative all-trans-retinol 13,14-reductase                                     | RETSAT       | 1.53±0.19 | 0.57±0.02 | 2.70 |
| C2_95323  | Putative alpha-L-fucosidase                                                    | FUCA2        | 0.68±0.14 | 0.32±0.03 | 2.11 |
| C2_962    | Putative aminopeptidase W07G4.4                                                | W07G4.4      | 0.72±0.13 | 0.46±0.04 | 1.56 |
| C2_15646  | Putative ATP-dependent RNA helicase an3                                        | an3          | 1.31±0.13 | 3.22±0.47 | 0.41 |
| C2_67091  | Putative deoxyribonuclease TATDN3                                              | TATDN3       | 0.7±0.16  | 0.49±0.05 | 1.43 |
| C2_980    | Putative deoxyribose-phosphate aldolase                                        | DERA         | 0.89±0.05 | 1.38±0.05 | 0.65 |
| C2_18015  | Putative deoxyribose-phosphate aldolase                                        | DERA         | 1.15±0.23 | 1.05±0.2  | 1.09 |
| C2_62575  | Putative helicase MOV-10                                                       | MOV10        | 0.94±0.05 | 0.61±0.05 | 1.54 |
| C2_5188   | Putative helicase mov-10-B.1                                                   | mov10b.1     | 1.14±0.09 | 0.95±0.07 | 1.19 |
| C2_17207  | Putative hexokinase HKDC1                                                      | HKDC1        | 1.24±0.08 | 1.69±0.08 | 0.73 |
| C2_721    | Putative hydroxypyruvate isomerase                                             | HYI          | 0.8±0.08  | 0.8±0.06  | 1.00 |
| C2_4760   | Putative L-aspartate dehydrogenase                                             | ASPDH        | 1.25±0.13 | 1.42±0.03 | 0.88 |
| C2_37616  | Putative leucine-rich repeat-containing protein DDB_G0290503                   | DDB_G0290503 | 0.73±0.1  | 0.64±0.08 | 1.13 |
| C2_1758   | Putative methyltransferase DDB_G0268948                                        | DDB_G0290503 | 1.28±0.2  | 4.34±1.07 | 0.29 |
| C2_9082   | Putative N-acetylglucosamine-6-phosphate deacetylase                           | AMDHD2       | 1±0.03    | 1.35±0.04 | 0.74 |
| C2_4695   | Putative oxidoreductase GLYR1                                                  | GLYR1        | 1.14±0.11 | 1.67±0.18 | 0.68 |
| C2_8640   | Putative oxidoreductase yteT                                                   | yteT         | 1.09±0.09 | 1.2±0.06  | 0.91 |
| C2_4527   | Putative peptidyl-tRNA hydrolase PTRHD1                                        | PTRHD1       | 0.66±0.12 | 0.58±0.05 | 1.12 |
| C2_586    | Putative phospholipase B-like 2                                                | PLBD2        | 0.73±0.12 | 0.46±0.05 | 1.60 |
| C2_105694 | Putative protein PHLOEM PROTEIN 2-LIKE A3                                      | IAN10        | 0.73±0.22 | 1.37±0.16 | 0.53 |
| C2_2726   | Putative serine protease K12H4.7                                               | K12H4.7      | 0.6±0.14  | 0.43±0.05 | 1.39 |
| C2_15791  | Pyridine nucleotide-disulfide oxidoreductase domain-containing protein 2       | PYROXD2      | 1.12±0.08 | 0.79±0.05 | 1.42 |
| C2_8233   | Pyridoxal kinase                                                               | PDXK         | 0.77±0.12 | 0.5±0.03  | 1.52 |
| C2_18360  | Pyridoxal phosphate phosphatase PHOSPHO2                                       | PHOSPHO2     | 1.32±0.14 | 1.2±0.06  | 1.10 |
| C2_4524   | Pyridoxine-5'-phosphate oxidase                                                | PNPO         | 1.32±0.14 | 1.22±0.06 | 1.08 |
| C2_107720 | Pyrin                                                                          | MEFV         | 1.02±0.05 | 1.19±0.14 | 0.85 |
| C2_2476   | Pyroglutamyl-peptidase 1                                                       | PGPEP1       | 0.87±0.08 | 1.24±0.07 | 0.70 |
| C2_9289   | Pyrroline-5-carboxylate reductase 3                                            | PYCRL        | 0.7±0.11  | 0.45±0.07 | 1.54 |
| C2_2292   | Pyruvate dehydrogenase E1 component subunit alpha, somatic form, mitochondrial | PDHA1        | 0.93±0.09 | 0.52±0.05 | 1.78 |
| C2_2277   | Pyruvate dehydrogenase E1 component subunit beta, mitochondrial                | PDHB         | 0.97±0.09 | 0.41±0.03 | 2.37 |
| C2_13692  | Pyruvate kinase isozyme M1                                                     | PKM          | 1.39±0.15 | 2.07±0.14 | 0.67 |
| C2_96589  | Pyruvate kinase isozymes M1/M2                                                 | PKLR         | 1.17±0.07 | 1.46±0.07 | 0.80 |
| C2_110881 | Pyruvate kinase isozymes M1/M2                                                 | PKLR         | 1.9±0.35  | 2.2±0.15  | 0.87 |
| C2_7049   | Pyruvate kinase isozymes R/L                                                   | PKRL         | 2.19±0.46 | 3.12±0.13 | 0.70 |
| C2_2874   | Pyruvate kinase muscle isozyme                                                 | PKM          | 1.36±0.15 | 2±0.12    | 0.68 |
| C2_1390   | Quinone oxidoreductase                                                         | CRYZ         | 1.36±0.17 | 1.91±0.04 | 0.71 |
| C2_32560  | Rab GDP dissociation inhibitor alpha                                           | GDI1         | 1.13±0.05 | 2.05±0.03 | 0.55 |
| C2_455    | Rab GDP dissociation inhibitor beta                                            | GDI2         | 1.27±0.1  | 1.9±0.09  | 0.67 |
| C2_5010   | RAC-beta serine/threonine-protein kinase                                       | AKT2         | 0.77±0.08 | 0.57±0.05 | 1.34 |
| C2_81910  | Ral GTPase-activating protein subunit beta                                     | RALGAPB      | 0.83±0.06 | 0.85±0.07 | 0.98 |
| C2_6063   | Ran GTPase-activating protein 1                                                | RANGAP1      | 0.65±0.14 | 0.58±0.04 | 1.12 |
| C2_24742  | Ran-specific GTPase-activating protein                                         | RANBP1       | 1.05±0.16 | 1.78±0.18 | 0.59 |
| C2_10857  | Rap1 GTPase-GDP dissociation stimulator 1                                      | RAP1GDS1     | 1.37±0.3  | 1.34±0.27 | 1.03 |
| C2_9580   | Ras GTPase-activating protein 1                                                | RASA1        | 0.94±0.02 | 1.23±0.11 | 0.77 |
| C2_35658  | Ras GTPase-activating protein-binding protein 2                                | G3BP2        | 1.15±0.09 | 1±0.04    | 1.15 |
| C2_25291  | Ras GTPase-activating-like protein IQGAP1                                      | IQGAP1       | 0.99±0.02 | 1.87±0.06 | 0.53 |
| C2_54281  | Ras GTPase-activating-like protein IQGAP1                                      | IQGAP1       | 0.85±0.06 | 1.15±0.04 | 0.74 |
| C2_5031   | Ras GTPase-activating-like protein IQGAP1                                      | IQGAP1       | 0.77±0.08 | 0.61±0.07 | 1.26 |
| C2_93369  | Ras GTPase-activating-like protein IQGAP2                                      | IQGAP2       | 0.87±0.05 | 1.79±0.23 | 0.49 |
| C2_7014   | Ras GTPase-activating-like protein IQGAP2                                      | IQGAP2       | 0.92±0.05 | 1.67±0.24 | 0.55 |
| C2_1754   | Ras suppressor protein 1                                                       | RSU1         | 1.1±0.14  | 2.12±0.13 | 0.52 |
| C2_22704  | Ras-like GTP-binding protein O-RHO                                             | RHO_0        | 0.86±0.06 | 0.72±0.09 | 1.19 |
| C2_1097   | Ras-related C3 botulinum toxin substrate 1                                     | RAC1         | 1.82±0.38 | 3.21±0.06 | 0.57 |
| C2_121610 | Ras-related C3 botulinum toxin substrate 2                                     | RAC2         | 1.51±0.22 | 2.44±0.17 | 0.62 |
| C2_954    | Ras-related GTP-binding protein A                                              | RRAGA        | 0.93±0.03 | 1.05±0.08 | 0.89 |
| C2_6071   | Ras-related protein Rab-10                                                     | RAB10        | 1±0.08    | 1.07±0.13 | 0.94 |
| C2_3156   | Ras-related protein Rab-11A                                                    | RAB11A       | 0.92±0.05 | 1.13±0.26 | 0.81 |
| C2_2067   | Ras-related protein Rab-11B                                                    | RAB11B       | 1.11±0.05 | 2.08±0.22 | 0.53 |
| C2_11524  | Ras-related protein Rab-13                                                     | RAB13        | 1.02±0.06 | 0.92±0.04 | 1.11 |
| C2_10036  | Ras-related protein Rab-14                                                     | RAB14        | 1.15±0.1  | 1.65±0.08 | 0.70 |

|           |                                                       |          |           |           |      |
|-----------|-------------------------------------------------------|----------|-----------|-----------|------|
| C2_46044  | Ras-related protein Rab-18                            | RAB18    | 1.15±0.1  | 1.04±0.03 | 1.11 |
| C2_7624   | Ras-related protein Rab-1A                            | RAB1A    | 0.97±0.07 | 0.82±0.09 | 1.19 |
| C2_67687  | Ras-related protein Rab-1B                            | RAB1B    | 0.97±0.12 | 0.64±0.06 | 1.52 |
| C2_6207   | Ras-related protein Rab-20                            | RAB20    | 1.04±0.04 | 0.97±0.03 | 1.07 |
| C2_1465   | Ras-related protein Rab-2A                            | RAB2A    | 1.59±0.24 | 2.18±0.05 | 0.73 |
| C2_4800   | Ras-related protein Rab-32                            | RAB32    | 1.38±0.19 | 1.86±0.23 | 0.74 |
| C2_6579   | Ras-related protein Rab-5B                            | RAB5B    | 1.15±0.09 | 1.54±0.39 | 0.75 |
| C2_7828   | Ras-related protein Rab-5C                            | RAB5C    | 1.12±0.07 | 2.73±0.2  | 0.41 |
| C2_30388  | Ras-related protein Rab-6A                            | RAB6A    | 1.1±0.05  | 0.77±0.04 | 1.43 |
| C2_10429  | Ras-related protein Rab-7a                            | RAB7A    | 1.38±0.16 | 2.11±0.09 | 0.65 |
| C2_4343   | Ras-related protein Rab-8A                            | RAB8A    | 0.82±0.09 | 1.39±0.09 | 0.59 |
| C2_37155  | Ras-related protein Ral-A                             | RALA     | 1.02±0.12 | 0.58±0.07 | 1.77 |
| C2_935    | Ras-related protein Ral-B                             | RALB     | 0.96±0.17 | 1.12±0.17 | 0.86 |
| C2_879    | Ras-related protein Rap-1b                            | RAP1B    | 0.86±0.11 | 0.69±0.09 | 1.24 |
| C2_7026   | Ras-related protein R-Ras2                            | RRAS2    | 0.83±0.08 | 0.97±0.12 | 0.86 |
| C2_1650   | Receptor expression-enhancing protein 5               | REEP5    | 0.93±0.11 | 1.03±0.04 | 0.90 |
| C2_2387   | Receptor-type tyrosine-protein phosphatase C          | PTPRC    | 1.18±0.17 | 0.76±0.08 | 1.55 |
| C2_21979  | Receptor-type tyrosine-protein phosphatase F          | PTPRF    | 0.76±0.16 | 0.24±0.04 | 3.12 |
| C2_1647   | Regucalcin                                            | RGN      | 0.71±0.12 | 0.64±0.04 | 1.11 |
| C2_2457   | Regulator of microtubule dynamics protein 1           | RMDN1    | 1.77±0.39 | 1.85±0.13 | 0.95 |
| C2_66382  | Regulator of nonsense transcripts 1                   | UPF1     | 1.09±0.12 | 1.01±0.07 | 1.08 |
| C2_16594  | Regulator of nonsense transcripts 2                   | UPF2     | 1.4±0.18  | 0.97±0.09 | 1.45 |
| C2_12838  | Renalase                                              | RNLS     | 1.32±0.11 | 1.1±0.03  | 1.20 |
| C2_8576   | Replication protein A 14 kDa subunit                  | RPA3     | 0.8±0.07  | 0.53±0.09 | 1.50 |
| C2_606    | Reticulon-3                                           | RTN3     | 1.26±0.16 | 1.67±0.11 | 0.75 |
| C2_1570   | Reticulon-4                                           | RTN4     | 1.22±0.13 | 1.27±0.09 | 0.96 |
| C2_25541  | Retinal dehydrogenase 1                               | ALDH1A1  | 1.85±0.32 | 0.89±0.07 | 2.08 |
| C2_933    | Retinal dehydrogenase 2                               | ALDH1A2  | 0.71±0.11 | 0.18±0.02 | 3.99 |
| C2_223    | Retinoid-inducible serine carboxypeptidase            | SCPEP1   | 1.01±0.18 | 0.72±0.08 | 1.41 |
| C2_3697   | Retinol dehydrogenase 12                              | RDH12    | 1.2±0.07  | 0.92±0.03 | 1.30 |
| C2_9252   | Retinol dehydrogenase 3                               | Rdh7     | 1.55±0.25 | 0.92±0.06 | 1.69 |
| C2_41464  | Retinol dehydrogenase 7                               | Rdh7     | 1.5±0.27  | 0.78±0.04 | 1.91 |
| C2_5947   | Retinol-binding protein 1                             | RBP1     | 1.29±0.21 | 1.29±0.04 | 1.00 |
| C2_11901  | Retinol-binding protein 2                             | RBP2     | 3.44±1.11 | 1.4±0.04  | 2.46 |
| C2_14604  | Retinol-binding protein 4-A                           | RBP4     | 1.12±0.11 | 0.92±0.09 | 1.22 |
| C2_241    | Rho GDP-dissociation inhibitor 1                      | ARHGDI1  | 1.57±0.21 | 1.72±0.02 | 0.91 |
| C2_30696  | Rho GTPase-activating protein 1                       | ARHGAP1  | 0.97±0.06 | 1.38±0.06 | 0.70 |
| C2_31684  | Rho GTPase-activating protein 10                      | ARHGAP10 | 1.15±0.07 | 0.98±0.21 | 1.17 |
| C2_10795  | Rho GTPase-activating protein 12                      | ARHGAP12 | 0.92±0.04 | 0.72±0.14 | 1.28 |
| C2_58410  | Rho GTPase-activating protein 17                      | ARHGAP17 | 1.09±0.16 | 2.71±0.36 | 0.40 |
| C2_22447  | Rho guanine nucleotide exchange factor 6              | ARHGEF6  | 0.91±0.03 | 1.19±0.03 | 0.77 |
| C2_30428  | Rho-related GTP-binding protein RhoC                  | RHOC     | 1.22±0.13 | 1.64±0.15 | 0.75 |
| C2_34617  | Riboflavin kinase                                     | RFK      | 1.63±0.28 | 2.41±0.48 | 0.68 |
| C2_2718   | Ribokinase                                            | RBKS     | 0.69±0.13 | 0.39±0.05 | 1.77 |
| C2_461    | Ribonuclease H2 subunit B                             | RNASEH2B | 0.91±0.04 | 1.47±0.09 | 0.61 |
| C2_136    | Ribonuclease T2                                       | RNASET2  | 1.35±0.25 | 0.79±0.04 | 1.71 |
| C2_8404   | Ribonuclease UK114                                    | HRS12    | 1.04±0.16 | 0.78±0.08 | 1.33 |
| C2_28116  | Ribose-5-phosphate isomerase                          | RPIA     | 0.92±0.06 | 0.83±0.04 | 1.10 |
| C2_3757   | Ribose-phosphate pyrophosphokinase 2                  | PRPS2    | 1.1±0.06  | 1.31±0.08 | 0.83 |
| C2_2840   | Ribosomal protein S6 kinase 2 alpha                   | RPS6KA2  | 1.39±0.14 | 1.98±0.27 | 0.70 |
| C2_38170  | Ribosomal protein S6 kinase alpha-3                   | RPS6KA3  | 0.97±0.07 | 1.82±0.16 | 0.54 |
| C2_1091   | Ribosome maturation protein SBDS                      | SBDS     | 0.91±0.03 | 1.55±0.26 | 0.58 |
| C3_c19359 | Ribosylidihyronicotinamide dehydrogenase [quinone]    | NQO2     | 1.09±0.06 | 0.5±0.03  | 2.18 |
| C2_7254   | RILP-like protein 1                                   | RILPL1   | 0.94±0.03 | 1.14±0.07 | 0.82 |
| C2_47038  | RNA polymerase-associated protein CTR9 homolog        | CTR9     | 0.46±0.18 | 0.32±0.06 | 1.42 |
| C2_2005   | RNA-binding protein 39                                | RBM39    | 0.63±0.13 | 0.65±0.08 | 0.96 |
| C2_6486   | RNA-binding protein 47                                | RBM47    | 1.36±0.22 | 3.07±0.43 | 0.44 |
| C2_21199  | RNA-binding protein 8A                                | RBM8A    | 1.5±0.19  | 2.4±0.2   | 0.63 |
| C2_11034  | RNA-binding protein with multiple splicing            | RBPMS    | 0.97±0.07 | 2.17±0.91 | 0.45 |
| C2_26961  | RPE-retinal G protein-coupled receptor                | RGR      | 1.29±0.1  | 1.41±0.17 | 0.91 |
| C2_1576   | RuvB-like 2                                           | RUVBL2   | 0.9±0.05  | 1.3±0.08  | 0.69 |
| C2_11264  | S-acyl fatty acid synthase thioesterase, medium chain | OLAH     | 1.18±0.12 | 1.24±0.1  | 0.95 |
| C2_1879   | S-adenosylmethionine synthase isoform type-1          | MAT1A    | 1.87±0.47 | 0.92±0.05 | 2.03 |
| C2_972    | S-adenosylmethionine synthase isoform type-2          | MAT2A    | 1.3±0.11  | 1.19±0.05 | 1.09 |
| C2_904    | Sarcoplasmic/endoplasmic reticulum calcium ATPase 1   | ATP2A1   | 1.23±0.13 | 0.82±0.1  | 1.50 |
| C2_26743  | Saxitoxin and tetrodotoxin-binding protein 1          | PSBP1    | 1.14±0.15 | 2.89±0.84 | 0.39 |
| C2_1565   | Scavenger mRNA-decapping enzyme Dcp5                  | DCPS     | 1±0.03    | 1.04±0.04 | 0.97 |

|           |                                                                                   |            |           |           |      |
|-----------|-----------------------------------------------------------------------------------|------------|-----------|-----------|------|
| C2_13518  | Scavenger receptor class B member 1                                               | SCARB1     | 1.16±0.09 | 0.53±0.02 | 2.18 |
| C2_82621  | Sec1 family domain-containing protein 2                                           | SCFD2      | 0.98±0.05 | 0.87±0.06 | 1.12 |
| C2_5402   | SEC23-interacting protein                                                         | SEC23IP    | 1.15±0.09 | 1.06±0.07 | 1.08 |
| C2_55720  | Secernin-2                                                                        | SCRN2      | 0.99±0.03 | 1.31±0.07 | 0.75 |
| C2_13742  | Secernin-2                                                                        | SCRN2      | 0.77±0.08 | 0.66±0.01 | 1.16 |
| C2_1954   | Sel1 repeat-containing protein 1                                                  | COA7       | 1.11±0.08 | 0.45±0.02 | 2.47 |
| C2_19513  | Selenide, water dikinase 1                                                        | SEPHS1     | 0.94±0.02 | 0.82±0.06 | 1.14 |
| C2_6263   | Selenide, water dikinase 2                                                        | SEPHS2     | 0.96±0.02 | 1.02±0.06 | 0.94 |
| C2_4668   | Selenium-binding protein 1                                                        | SELENBP1   | 1.09±0.09 | 0.68±0.02 | 1.60 |
| C2_17882  | Selenocysteine lyase                                                              | SCLY       | 0.68±0.11 | 0.49±0.02 | 1.38 |
| C2_5773   | Selenoprotein Pb                                                                  | N327_07950 | 2.24±0.49 | 2.31±0.47 | 0.97 |
| C2_150    | Selenoprotein T1a                                                                 | SELT       | 0.83±0.06 | 0.63±0.02 | 1.32 |
| C2_16505  | Septin-10                                                                         | SEPT10     | 1.37±0.19 | 2.1±0.05  | 0.65 |
| C2_5603   | Septin-2                                                                          | SEPT2      | 1.21±0.08 | 1.68±0.04 | 0.72 |
| C2_22270  | Septin-6                                                                          | SEPT6      | 1.22±0.14 | 1.61±0.09 | 0.76 |
| C2_8875   | Septin-7                                                                          | SEPT7      | 0.99±0.07 | 2.06±0.57 | 0.48 |
| C2_9888   | Septin-8-A                                                                        | SEPT8      | 0.71±0.12 | 0.82±0.04 | 0.86 |
| C2_5777   | Septin-9                                                                          | SEPT9      | 0.91±0.04 | 1.33±0.16 | 0.69 |
| C2_5672   | Ser/Thr-rich protein T10 in DGCR region                                           | TANGO2     | 0.94±0.07 | 0.78±0.04 | 1.21 |
| C2_10416  | Serine dehydratase-like                                                           | SDSL       | 1.14±0.12 | 2.9±0.41  | 0.39 |
| C2_1375   | Serine hydroxymethyltransferase, cytosolic                                        | SHMT1      | 0.85±0.07 | 1.02±0.08 | 0.84 |
| C2_3144   | Serine hydroxymethyltransferase, mitochondrial                                    | SHMT2      | 0.88±0.07 | 0.37±0.01 | 2.40 |
| C2_13008  | Serine hydroxymethyltransferase, mitochondrial                                    | SHMT2      | 0.79±0.1  | 0.25±0.02 | 3.12 |
| C2_75706  | Serine protease HTRA2, mitochondrial                                              | HTRA2      | 1.14±0.09 | 0.64±0.15 | 1.79 |
| C2_855    | Serine/arginine-rich splicing factor 11                                           | SRSF11     | 0.71±0.11 | 0.78±0.09 | 0.91 |
| C2_19668  | Serine/arginine-rich splicing factor 1B                                           | SRSF1B     | 0.94±0.06 | 0.92±0.04 | 1.02 |
| C2_8391   | Serine/threonine-protein kinase 24                                                | STK24      | 0.57±0.15 | 0.56±0.05 | 1.02 |
| C2_11819  | Serine/threonine-protein kinase MARK1                                             | MARK1      | 0.6±0.16  | 0.29±0.01 | 2.07 |
| C2_4306   | Serine/threonine-protein kinase MST4                                              | STK26      | 0.89±0.07 | 1.45±0.15 | 0.62 |
| C3_c7700  | Serine/threonine-protein kinase mTOR                                              | MTOR       | 0.95±0.03 | 0.98±0.08 | 0.97 |
| C2_16112  | Serine/threonine-protein kinase OSR1                                              | OXR1       | 0.9±0.07  | 1.11±0.12 | 0.82 |
| C2_3226   | Serine/threonine-protein kinase PAK 2                                             | PAK2       | 1.85±0.29 | 4.83±2.79 | 0.38 |
| C2_7652   | Serine/threonine-protein kinase Sgk1                                              | SGK1       | 1.42±0.17 | 1.42±0.33 | 0.99 |
| C2_19367  | Serine/threonine-protein kinase TAO3                                              | TAOK3      | 0.78±0.09 | 0.81±0.17 | 0.98 |
| C2_3218   | Serine/threonine-protein kinase TBK1                                              | TBK1       | 1.24±0.11 | 1.47±0.1  | 0.85 |
| C2_8036   | Serine/threonine-protein phosphatase 2A 55 kDa regulatory subunit B alpha isoform | PPP2R2A    | 1±0.06    | 1.3±0.15  | 0.77 |
| C2_16972  | Serine/threonine-protein phosphatase 2A 56 kDa regulatory subunit alpha isoform   | PPP2R5A    | 0.98±0.08 | 1.42±0.21 | 0.69 |
| C2_16062  | Serine/threonine-protein phosphatase 2A 56 kDa regulatory subunit epsilon isoform | PPP2R5E    | 1.11±0.09 | 2.5±0.29  | 0.44 |
| C2_5266   | Serine/threonine-protein phosphatase 2A 56 kDa regulatory subunit gamma isoform   | Ppp2r5c    | 0.83±0.07 | 0.85±0.09 | 0.98 |
| C2_7698   | Serine/threonine-protein phosphatase 2A 65 kDa regulatory subunit A beta isoform  | PPP2R1B    | 1.08±0.07 | 1.96±0.21 | 0.55 |
| C2_4187   | Serine/threonine-protein phosphatase 2A activator                                 | PPP2R4     | 0.99±0.04 | 1.35±0.05 | 0.73 |
| C2_11251  | Serine/threonine-protein phosphatase 2A catalytic subunit alpha isoform           | PPP2CA     | 0.84±0.08 | 1.14±0.1  | 0.74 |
| C2_22338  | Serine/threonine-protein phosphatase 2B catalytic subunit alpha isoform           | PPP3CA     | 0.83±0.1  | 0.49±0.04 | 1.70 |
| C3_c15023 | Serine/threonine-protein phosphatase 2B catalytic subunit beta isoform            | PPP3CB     | 1.46±0.21 | 1.74±0.12 | 0.84 |
| C2_2026   | Serine/threonine-protein phosphatase 4 catalytic subunit B                        | PPP4C      | 0.89±0.07 | 0.91±0.13 | 0.98 |
| C2_7354   | Serine/threonine-protein phosphatase 5                                            | PPP5C      | 0.89±0.06 | 0.74±0.04 | 1.21 |
| C2_2436   | Serine/threonine-protein phosphatase 6 catalytic subunit                          | PPP6C      | 1.04±0.06 | 0.86±0.09 | 1.21 |
| C2_29197  | Serine/threonine-protein phosphatase 6 regulatory subunit 2                       | PPP6R2     | 1.21±0.1  | 2.35±0.07 | 0.51 |
| C2_9266   | Serine/threonine-protein phosphatase 6 regulatory subunit 3                       | PPP6R3     | 0.9±0.06  | 0.97±0.05 | 0.93 |
| C2_53637  | Serine/threonine-protein phosphatase PP1-alpha catalytic subunit                  | PPP1CA     | 0.78±0.07 | 0.45±0.05 | 1.73 |
| C2_1167   | Serine/threonine-protein phosphatase PP1-beta catalytic subunit                   | PPP1CB     | 0.66±0.12 | 0.59±0.01 | 1.11 |
| C2_553    | Serine/threonine-protein phosphatase PP1-gamma catalytic subunit                  | Ppp1cc     | 0.98±0.08 | 1.18±0.1  | 0.83 |
| C2_1377   | Serine--pyruvate aminotransferase, mitochondrial                                  | AGXT       | 0.59±0.14 | 0.62±0.03 | 0.95 |
| C2_866    | Serine-threonine kinase receptor-associated protein                               | STRAP      | 0.86±0.05 | 0.83±0.05 | 1.04 |
| C2_7158   | Serotransferrin                                                                   | TF         | 1.09±0.06 | 0.9±0.11  | 1.21 |
| C2_21508  | Serpin A3-5                                                                       | SERPINA3   | 0.92±0.03 | 1.36±0.35 | 0.68 |
| C2_112963 | Serpin B6                                                                         | SERPINB6   | 1.2±0.41  | 0.37±0.04 | 3.27 |

|           |                                                         |          |            |           |      |
|-----------|---------------------------------------------------------|----------|------------|-----------|------|
| C2_110965 | Serpin B8                                               | SERPINB8 | 0.81±0.15  | 0.41±0.03 | 1.96 |
| C2_14608  | Serum amyloid P-component                               | APCS     | 0.81±0.09  | 1.22±0.49 | 0.66 |
| C2_7237   | Seryl-tRNA synthetase, cytoplasmic                      | SARS     | 1.28±0.11  | 1.72±0.44 | 0.74 |
| C2_5020   | Sex hormone-binding globulin                            | SHBG     | 0.99±0.06  | 1.35±0.19 | 0.74 |
| C2_778    | S-formylglutathione hydrolase                           | ESD      | 0.97±0.12  | 0.64±0.06 | 1.51 |
| C2_122    | SH3 domain-binding glutamic acid-rich-like protein      | SH3BGRL  | 1.06±0.04  | 2.13±0.18 | 0.50 |
| C2_107681 | SH3 domain-binding glutamic acid-rich-like protein 3    | SH3BGRL3 | 52.87±17.6 | 76.65±8.3 | 0.69 |
| C2_4801   | SHC-transforming protein 1                              | SHC1     | 0.86±0.11  | 1.61±0.31 | 0.54 |
| C2_2197   | Sialic acid synthase                                    | NANS     | 1.7±0.37   | 3.74±0.11 | 0.45 |
| C2_1438   | Sialidase-1                                             | NEU1     | 0.73±0.12  | 0.43±0.04 | 1.69 |
| C2_10902  | Signal peptide peptidase-like 2A                        | SPPL2A   | 0.51±0.17  | 0.18±0.06 | 2.88 |
| C2_672    | Signal recognition particle 14 kDa protein              | SRP14    | 1.1±0.12   | 0.73±0.04 | 1.51 |
| C2_2849   | Signal recognition particle 54 kDa protein              | SRP54    | 0.73±0.09  | 0.63±0.24 | 1.16 |
| C2_45522  | Signal recognition particle 68 kDa protein              | SRP68    | 0.92±0.03  | 0.79±0.03 | 1.16 |
| C2_627    | Signal recognition particle receptor subunit beta       | SRPRB    | 0.86±0.05  | 0.47±0.05 | 1.83 |
| C2_2871   | Signal transducer and activator of transcription 3      | STAT3    | 1.11±0.08  | 1.68±0.04 | 0.66 |
| C2_74614  | Signal transducer and activator of transcription 5B     | STAT5B   | 0.46±0.2   | 0.38±0.07 | 1.19 |
| C2_23082  | Signal-transducing adaptor protein 2                    | STAP2    | 0.7±0.11   | 0.5±0.02  | 1.38 |
| C2_2831   | Single-stranded DNA-binding protein, mitochondrial      | SSBP1    | 1.13±0.06  | 1.06±0.09 | 1.06 |
| C2_4819   | Small nuclear ribonucleoprotein E                       | SNRPE    | 0.84±0.1   | 0.6±0.05  | 1.39 |
| C2_27604  | Small nuclear ribonucleoprotein F                       | SNRPF    | 0.88±0.11  | 0.54±0.03 | 1.63 |
| C2_44786  | Small nuclear ribonucleoprotein G                       | Snrgp    | 0.77±0.09  | 0.48±0.15 | 1.62 |
| C2_68502  | Small nuclear ribonucleoprotein Sm D1                   | SNRPD1   | 0.95±0.09  | 0.71±0.04 | 1.35 |
| C2_46947  | Small nuclear ribonucleoprotein Sm D2                   | SNRPD2   | 0.79±0.1   | 0.45±0.04 | 1.74 |
| C2_7038   | Small nuclear ribonucleoprotein Sm D3                   | SNRPD3   | 1.14±0.05  | 0.92±0.07 | 1.24 |
| C3_c22073 | Small nuclear ribonucleoprotein-associated protein B    | SNRPB    | 0.79±0.11  | 0.38±0.05 | 2.09 |
| C2_957    | Small ubiquitin-related modifier 2                      | SUMO2    | 1.12±0.22  | 2.92±0.2  | 0.38 |
| C2_6185   | S-methyl-5'-thioadenosine phosphorylase                 | MTAP     | 0.79±0.07  | 0.74±0.04 | 1.07 |
| C2_17880  | Smoothelin-like protein 1                               | SMTNL1   | 0.98±0.13  | 1.67±0.2  | 0.58 |
| C2_837    | Sodium/potassium-transporting ATPase subunit alpha-1    | ATP1A1   | 1.6±0.29   | 1.98±0.12 | 0.81 |
| C2_117537 | Sodium/potassium-transporting ATPase subunit beta-1     | ATP1B1   | 2.06±0.52  | 0.47±0.07 | 4.37 |
| C2_1659   | Sodium-dependent neutral amino acid transporter B(0)AT3 | SLC6A18  | 0.76±0.13  | 0.48±0.17 | 1.59 |
| C2_7224   | Sodium-dependent phosphate transport protein 2B         | SLC34A2  | 0.43±0.19  | 0.31±0.02 | 1.42 |
| C2_1685   | Solute carrier family 12 member 1                       | SLC12A1  | 1.14±0.08  | 0.96±0.03 | 1.19 |
| C2_1662   | Solute carrier family 13 member 2                       | SLC13A2  | 1.2±0.11   | 2.3±0.21  | 0.52 |
| C2_5557   | Solute carrier family 15 member 2                       | SLC15A2  | 0.81±0.15  | 1.17±0.11 | 0.70 |
| C2_1290   | Sorbitol dehydrogenase                                  | SORD     | 0.85±0.11  | 0.47±0.05 | 1.82 |
| C2_408    | Sorcin                                                  | SRI      | 0.81±0.08  | 1.99±0.35 | 0.40 |
| C2_2983   | Sorting nexin-1                                         | SNX1     | 0.87±0.07  | 1.81±0.49 | 0.48 |
| C2_629    | Sorting nexin-12                                        | SNX12    | 0.92±0.05  | 1.74±0.23 | 0.53 |
| C2_28449  | Sorting nexin-27                                        | SNX27    | 0.66±0.12  | 0.73±0.09 | 0.90 |
| C2_1195   | Sorting nexin-3                                         | SNX3     | 0.86±0.08  | 1.02±0.27 | 0.84 |
| C2_3908   | Sorting nexin-4                                         | SNX4     | 1±0.07     | 2.14±0.38 | 0.47 |
| C2_1441   | Sorting nexin-5                                         | SNX5     | 1.22±0.14  | 3.46±0.63 | 0.35 |
| C2_5922   | Sorting nexin-7                                         | SNX7     | 0.9±0.07   | 1.09±0.05 | 0.82 |
| C2_10159  | Sorting nexin-8                                         | SNX8     | 0.91±0.07  | 2±0.32    | 0.46 |
| C2_2143   | Sorting nexin-9                                         | SNX9     | 1.02±0.03  | 1.31±0.17 | 0.78 |
| C2_46272  | Spartin                                                 | Spg20    | 0.81±0.09  | 0.65±0.02 | 1.25 |
| C2_46691  | Spectrin alpha chain, brain                             | SPTAN1   | 1.09±0.14  | 2.26±0.1  | 0.48 |
| C2_95121  | Spectrin alpha chain, brain                             | SPTAN1   | 1.15±0.06  | 1.81±0.21 | 0.63 |
| C2_46348  | Spectrin alpha chain, brain                             | SPTAN1   | 1.33±0.2   | 1.88±0.18 | 0.71 |
| C2_84720  | Spectrin alpha chain, brain                             | SPTAN1   | 1.17±0.15  | 1.18±0.12 | 0.99 |
| C2_963    | Spectrin alpha chain, brain                             | SPTAN1   | 1.27±0.13  | 1.23±0.08 | 1.03 |
| C3_c42041 | Spectrin alpha chain, non-erythrocytic 1                | SPTAN1   | 0.88±0.05  | 1.03±0.04 | 0.86 |
| C2_46693  | Spectrin beta chain, brain 1                            | SPTBN1   | 0.95±0.04  | 1.64±0.2  | 0.58 |
| C2_31619  | Spectrin beta chain, brain 1                            | SPTBN1   | 0.64±0.15  | 1.03±0.09 | 0.62 |
| C2_8146   | Spermidine synthase                                     | SRM      | 1.13±0.14  | 0.79±0.06 | 1.44 |
| C2_159    | S-phase kinase-associated protein 1                     | SKP1     | 0.88±0.05  | 1.14±0.03 | 0.77 |
| C2_34246  | Sphingomyelin phosphodiesterase 2                       | SMPD2    | 1.06±0.05  | 0.76±0.06 | 1.40 |
| C2_4387   | Sphingosine-1-phosphate lyase 1                         | SGPL1    | 1.47±0.19  | 0.72±0.04 | 2.04 |
| C2_7011   | Spliceosome RNA helicase DDX39B homolog                 | DDX39B   | 1.22±0.13  | 1.6±0.25  | 0.76 |
| C2_4049   | Splicing factor 3A subunit 1                            | SF3A1    | 1.13±0.11  | 1.05±0.08 | 1.07 |
| C2_1100   | Splicing factor 3A subunit 3                            | SF3A3    | 0.95±0.08  | 1.13±0.13 | 0.85 |
| C2_991    | Splicing factor 3B subunit 1                            | SF3B1    | 1.05±0.08  | 1.26±0.09 | 0.83 |
| C2_17969  | Splicing factor 3B subunit 3                            | SF3B3    | 0.66±0.13  | 0.36±0.04 | 1.83 |
| C3_c39473 | Splicing factor 3B subunit 4                            | SF3B4    | 0.87±0.05  | 0.67±0.05 | 1.30 |
| C2_7753   | Splicing factor U2AF 65 kDa subunit                     | U2AF2    | 1.02±0.07  | 1.06±0.05 | 0.97 |

|                 |                                                                                               |         |           |           |      |
|-----------------|-----------------------------------------------------------------------------------------------|---------|-----------|-----------|------|
| C2_5025         | Splicing factor, proline- and glutamine-rich                                                  | SFPQ    | 1.06±0.04 | 1.2±0.04  | 0.89 |
| C2_121417       | Sporulation-specific protein 15                                                               | SPO15   | 0.63±0.13 | 0.47±0.02 | 1.36 |
| C2_25237        | Squamous cell carcinoma antigen recognized by T-cells 3                                       | SART3   | 0.93±0.06 | 0.74±0.04 | 1.25 |
| C2_9168         | STAM-binding protein-like A                                                                   | STAMBP  | 0.99±0.02 | 0.71±0.07 | 1.39 |
| C2_1302         | Staphylococcal nuclease domain-containing protein 1                                           | SND1    | 1.15±0.08 | 1.02±0.06 | 1.12 |
| C2_20724        | Stonustoxin subunit alpha                                                                     | SNTX-A  | 0.69±0.17 | 1.02±0.07 | 0.67 |
| C2_82883        | Stress-70 protein, mitochondrial                                                              | HSPA9   | 0.84±0.06 | 0.94±0.04 | 0.89 |
| C2_8732         | Stress-induced-phosphoprotein 1                                                               | STIP1   | 0.94±0.11 | 1.37±0.11 | 0.68 |
| C2_23619        | Striatin                                                                                      | STRN    | 0.93±0.05 | 1.22±0.07 | 0.76 |
| C2_56395        | Striatin-3                                                                                    | STRN3   | 1.23±0.09 | 1.33±0.03 | 0.92 |
| C2_32020        | Stromal membrane-associated protein 1                                                         | SMAP1   | 1±0.2     | 1.02±0.11 | 0.98 |
| C2_4823         | Structural maintenance of chromosomes protein 3                                               | SMC3    | 0.73±0.09 | 0.66±0.03 | 1.12 |
| C2_1571         | Succinate dehydrogenase [ubiquinone] flavoprotein subunit, mitochondrial                      | SDHA    | 1.44±0.29 | 0.7±0.03  | 2.07 |
| C2_255          | Succinyl-CoA ligase [ADP/GDP-forming] subunit alpha, mitochondrial                            | SUCLG1  | 1.05±0.05 | 0.92±0.04 | 1.14 |
| C2_11441        | Succinyl-CoA ligase [GDP-forming] subunit beta, mitochondrial                                 | SUCLG2  | 1.37±0.2  | 1.33±0.17 | 1.03 |
| C2_10991        | Sucrase-isomaltase, intestinal                                                                | SI      | 0.76±0.16 | 0.26±0.03 | 2.98 |
| s_rl0002d06_f_1 | Sulfhydryl oxidase 1                                                                          | QSOX1   | 0.61±0.14 | 0.47±0.04 | 1.29 |
| C2_5930         | Sulfide:quinone oxidoreductase, mitochondrial                                                 | SQRDL   | 1.33±0.16 | 0.9±0.05  | 1.49 |
| C3_c52929       | Sulfite oxidase                                                                               | SUOX    | 0.9±0.13  | 1.3±0.17  | 0.70 |
| C2_4747         | Sulfite oxidase, mitochondrial                                                                | SUOX    | 0.88±0.08 | 1.53±0.14 | 0.58 |
| C2_1085         | Sulfotransferase 1C1                                                                          | SULT1C3 | 0.89±0.07 | 2.51±0.56 | 0.35 |
| C2_3986         | Sulfotransferase 1C2                                                                          | SULT1C2 | 0.84±0.07 | 3.78±2.04 | 0.22 |
| C2_7228         | Sulfotransferase 6B1                                                                          | SULT6B1 | 1.32±0.12 | 2.35±0.16 | 0.56 |
| C2_8495         | Sulfotransferase family cytosolic 2B member 1                                                 | SULT2B1 | 1.63±0.23 | 1.65±0.28 | 0.99 |
| C2_6487         | SUMO-activating enzyme subunit 1                                                              | SAE1    | 1±0.02    | 1.41±0.16 | 0.71 |
| C2_6124         | SUMO-activating enzyme subunit 2                                                              | UBA2    | 0.87±0.07 | 1.49±0.42 | 0.58 |
| C2_11156        | SUMO-conjugating enzyme UBC9                                                                  | UBE2I   | 1.5±0.18  | 2.05±0.26 | 0.73 |
| C2_368          | Superoxide dismutase [Cu-Zn]                                                                  | SOD1    | 0.75±0.14 | 0.3±0.03  | 2.47 |
| C2_1642         | Superoxide dismutase [Mn], mitochondrial                                                      | SOD2    | 0.74±0.12 | 0.29±0.02 | 2.54 |
| C2_1686         | Suppressor of G2 allele of SKP1 homolog                                                       | SUGT1   | 1.24±0.1  | 1.56±0.04 | 0.79 |
| C2_4089         | Sushi domain-containing protein 2                                                             | SUSD2   | 0.7±0.11  | 0.59±0.06 | 1.17 |
| C2_75529        | SWI/SNF complex subunit SMARCC1                                                               | SMARCC1 | 0.9±0.11  | 1.12±0.18 | 0.80 |
| C2_5248         | SWI/SNF-related matrix-associated actin-dependent regulator of chromatin subfamily D member 2 | SMARCD2 | 0.96±0.06 | 1.15±0.2  | 0.84 |
| C2_31339        | Synaptic vesicle membrane protein VAT-1 homolog                                               | VAT1    | 1.06±0.14 | 1.03±0.09 | 1.03 |
| C2_2785         | Synaptobrevin homolog YKT6                                                                    | YKT6    | 1.4±0.24  | 1.55±0.04 | 0.90 |
| C2_3925         | Synaptophysin-like protein 1                                                                  | SYPL1   | 0.93±0.12 | 0.3±0.03  | 3.05 |
| C2_3072         | Synaptophysin-like protein 2                                                                  | SYPL2   | 1.72±0.3  | 1.07±0.36 | 1.60 |
| C2_3553         | Syntaxin-7                                                                                    | STX7    | 0.8±0.07  | 1.44±0.55 | 0.56 |
| C2_3302         | Syntaxin-binding protein 2                                                                    | STXBP2  | 0.82±0.09 | 0.89±0.09 | 0.93 |
| C2_1047         | Syntenin-1                                                                                    | SDCBP   | 1.14±0.09 | 1.71±0.25 | 0.66 |
| C2_15378        | Talin-1                                                                                       | TLN1    | 1.23±0.11 | 2.9±0.09  | 0.42 |
| C2_40101        | Talin-1                                                                                       | TLN1    | 1.23±0.13 | 1.95±0.14 | 0.63 |
| C2_76944        | Talin-1                                                                                       | TLN1    | 1.01±0.06 | 1.11±0.05 | 0.91 |
| C2_5352         | Talin-1                                                                                       | TLN1    | 0.94±0.03 | 0.89±0.03 | 1.05 |
| C2_83924        | Talin-1                                                                                       | TLN1    | 1.13±0.06 | 1.01±0.08 | 1.12 |
| C2_41984        | Talin-2                                                                                       | TLN2    | 0.94±0.05 | 1.27±0.02 | 0.74 |
| C2_4568         | TAR DNA-binding protein 43                                                                    | TARDBP  | 1.23±0.21 | 1.97±0.25 | 0.62 |
| C2_8321         | Target of Myb protein 1                                                                       | TOM1    | 1.02±0.1  | 1.98±0.2  | 0.52 |
| C2_13458        | Tax1-binding protein 3                                                                        | TAX1BP3 | 0.88±0.06 | 0.69±0.11 | 1.28 |
| C2_8193         | TBC1 domain family member 13                                                                  | TBC1D13 | 1.16±0.13 | 1.69±0.13 | 0.69 |
| C2_4562         | TBC1 domain family member 17                                                                  | TBC1D17 | 1.22±0.11 | 2.02±0.05 | 0.60 |
| C2_48672        | TBC1 domain family member 24                                                                  | TBC1D24 | 0.75±0.1  | 1.37±0.04 | 0.55 |
| C2_342          | T-complex protein 1 subunit alpha                                                             | TCP1    | 0.97±0.04 | 1.19±0.07 | 0.82 |
| C2_2982         | T-complex protein 1 subunit beta                                                              | CCT2    | 1.04±0.14 | 1.72±0.28 | 0.61 |
| C2_4858         | T-complex protein 1 subunit delta                                                             | CCT4    | 1.17±0.09 | 1.55±0.05 | 0.76 |
| C2_298          | T-complex protein 1 subunit epsilon                                                           | CCT5    | 1.15±0.09 | 1.6±0.23  | 0.72 |
| C2_1691         | T-complex protein 1 subunit eta                                                               | CCT7    | 1±0.05    | 1.19±0.14 | 0.84 |
| C2_1250         | T-complex protein 1 subunit gamma                                                             | CCT3    | 1.09±0.07 | 1.49±0.14 | 0.73 |
| C2_397          | T-complex protein 1 subunit theta                                                             | CCT8    | 1.38±0.16 | 2.04±0.22 | 0.68 |
| C2_3533         | T-complex protein 1 subunit zeta                                                              | CCT6A   | 1.05±0.05 | 1.6±0.21  | 0.66 |
| C2_77           | Tetraspanin-1                                                                                 | TSPAN1  | 0.68±0.13 | 0.56±0.06 | 1.23 |
| C2_652          | Tetratricopeptide repeat protein 35                                                           | EMC2    | 0.81±0.07 | 0.67±0.04 | 1.21 |
| C2_2347         | Tetratricopeptide repeat protein 38                                                           | TTC38   | 1.12±0.07 | 2.46±0.12 | 0.45 |
| C2_7513         | THAP domain-containing protein 4                                                              | THAP4   | 0.69±0.11 | 0.74±0.1  | 0.93 |

|           |                                                                          |          |           |           |      |
|-----------|--------------------------------------------------------------------------|----------|-----------|-----------|------|
| C2_7496   | Thiamin pyrophosphokinase 1                                              | TPK1     | 1±0.09    | 0.8±0.05  | 1.24 |
| C2_15542  | Thimet oligopeptidase                                                    | THOP1    | 0.78±0.08 | 0.49±0.05 | 1.60 |
| C2_71169  | Thimet oligopeptidase                                                    | THOP1    | 0.82±0.09 | 0.46±0.07 | 1.79 |
| C2_1158   | Thioredoxin                                                              | TXN      | 3.24±0.99 | 8.79±0.88 | 0.37 |
| C2_4240   | Thioredoxin domain-containing protein 12                                 | TXNDC12  | 1.19±0.09 | 1.16±0.04 | 1.02 |
| C2_2180   | Thioredoxin domain-containing protein 17                                 | TXNDC17  | 1.75±0.27 | 2.93±0.15 | 0.60 |
| C2_5341   | Thioredoxin domain-containing protein 5                                  | TXNDC5   | 2.13±0.47 | 2.04±0.19 | 1.05 |
| C2_334    | Thioredoxin domain-containing protein 9                                  | TXNDC9   | 0.88±0.12 | 1.14±0.23 | 0.77 |
| C2_1093   | Thioredoxin reductase 3                                                  | TXNRD3   | 0.77±0.09 | 0.47±0.03 | 1.62 |
| C2_1183   | Thioredoxin-like protein 1                                               | TXNL1    | 0.81±0.08 | 0.48±0.04 | 1.71 |
| C3_c44742 | Thioredoxin-related transmembrane protein 1                              | TMX1     | 1.45±0.27 | 0.94±0.03 | 1.54 |
| C2_13380  | Thiosulfate sulfurtransferase/rhodanese-like domain-containing protein 1 | TSTD1    | 2.86±1.24 | 5.27±0.46 | 0.54 |
| C2_6564   | THO complex subunit 4                                                    | ALYREF   | 1.07±0.06 | 1.21±0.04 | 0.88 |
| C2_7672   | Threonine synthase-like 2                                                | THNSL2   | 0.83±0.07 | 0.55±0.04 | 1.51 |
| C2_3045   | Threonyl-tRNA synthetase, cytoplasmic                                    | TARS     | 1.56±0.19 | 1.47±0.07 | 1.06 |
| C2_11844  | THUMP domain-containing protein 1                                        | THUMPD1  | 1.14±0.19 | 1.07±0.15 | 1.06 |
| C2_34441  | Thymidine phosphorylase                                                  | TYMP     | 0.92±0.06 | 1.59±0.26 | 0.58 |
| C2_21128  | Thymidylate kinase                                                       | DTYMK    | 1.02±0.18 | 0.85±0.11 | 1.21 |
| C2_4641   | Thymocyte nuclear protein 1                                              | THYN1    | 1.32±0.19 | 2.34±0.15 | 0.57 |
| C2_20231  | Thyroid hormone-induced protein B                                        | NCOA3    | 0.78±0.11 | 0.48±0.04 | 1.64 |
| C2_14436  | Tight junction protein ZO-2                                              | TJP2     | 0.95±0.04 | 1.18±0.03 | 0.81 |
| C2_1981   | Tissue alpha-L-fucosidase                                                | FUCA1    | 0.85±0.14 | 0.48±0.03 | 1.75 |
| C2_8546   | Tissue factor                                                            | F3       | 0.74±0.12 | 0.34±0.03 | 2.17 |
| C2_6212   | Tissue factor pathway inhibitor                                          | TFPI     | 0.61±0.13 | 0.88±0.13 | 0.69 |
| C2_1974   | Toll-interacting protein                                                 | TOLLIP   | 1.5±0.17  | 1.89±0.04 | 0.80 |
| C2_63548  | TOM1-like protein 2                                                      | TOM1L2   | 1.87±0.44 | 3.3±0.44  | 0.57 |
| C2_4702   | TP53RK-binding protein                                                   | TPRKB    | 1.1±0.04  | 2.17±0.37 | 0.51 |
| C2_10331  | Trafficking protein particle complex subunit 1                           | TRAPPC1  | 0.97±0.01 | 1.08±0.03 | 0.90 |
| C2_38920  | Trafficking protein particle complex subunit 11                          | TRAPPC11 | 1±0.22    | 1.96±0.26 | 0.51 |
| C2_7033   | Trafficking protein particle complex subunit 11                          | TRAPPC11 | 0.75±0.09 | 0.71±0.06 | 1.05 |
| C2_3017   | Trafficking protein particle complex subunit 2                           | TRAPPC2  | 0.98±0.09 | 0.85±0.06 | 1.15 |
| C2_23806  | Trafficking protein particle complex subunit 3                           | TRAPPC3  | 0.96±0.19 | 1.68±0.24 | 0.57 |
| C2_554    | Trafficking protein particle complex subunit 4                           | TRAPPC4  | 1.44±0.16 | 1.57±0.05 | 0.91 |
| C2_16861  | Trafficking protein particle complex subunit 5                           | TRAPPC5  | 1.07±0.09 | 1.02±0.21 | 1.06 |
| C2_15018  | Trafficking protein particle complex subunit 9                           | TRAPPC9  | 0.84±0.06 | 0.74±0.14 | 1.13 |
| C2_18467  | Trans-1,2-dihydrobenzene-1,2-diol dehydrogenase                          | DHDH     | 1.19±0.07 | 1.14±0.02 | 1.05 |
| C2_564    | Transaldolase                                                            | TALDO1   | 1.59±0.22 | 1.9±0.05  | 0.84 |
| C2_18811  | Transcobalamin-2                                                         | TCN2     | 0.64±0.12 | 0.66±0.1  | 0.98 |
| C2_529    | Transcription elongation factor B polypeptide 1                          | TCEB1    | 1.37±0.18 | 1.86±0.13 | 0.74 |
| C2_942    | Transcription elongation factor B polypeptide 2                          | Tceb2    | 1.13±0.1  | 1.4±0.07  | 0.81 |
| C2_5103   | Transcription elongation factor SPT5                                     | SUPT5H   | 0.91±0.05 | 0.88±0.05 | 1.04 |
| C2_87436  | Transcription elongation factor SPT6                                     | SUPT6H   | 1.13±0.22 | 0.94±0.07 | 1.20 |
| C2_14940  | Transcription factor BTF3 homolog 4                                      | BTF3L4   | 1.07±0.08 | 1.24±0.22 | 0.86 |
| C2_4032   | Transcription factor p65                                                 | RELA     | 0.87±0.07 | 0.8±0.04  | 1.09 |
| C2_6927   | Transcription initiation factor IIA subunit 2                            | GTF2A2   | 0.61±0.19 | 0.33±0.04 | 1.84 |
| C2_1687   | Transcriptional activator protein Pur-beta-B                             | PURB     | 0.68±0.11 | 0.82±0.03 | 0.83 |
| C2_1468   | Transducin beta-like protein 2                                           | TBL2     | 0.83±0.07 | 0.61±0.05 | 1.36 |
| C2_3567   | Transferrin receptor protein 1                                           | TFRC     | 0.91±0.07 | 0.64±0.08 | 1.42 |
| C2_4791   | Transgelin                                                               | TAGLN    | 1.12±0.16 | 2.28±0.58 | 0.49 |
| C2_15562  | Transitional endoplasmic reticulum ATPase                                | VCP      | 1.89±0.34 | 3.05±0.31 | 0.62 |
| C3_c25177 | Transitional endoplasmic reticulum ATPase                                | VCP      | 0.7±0.12  | 0.56±0.05 | 1.26 |
| C3_c6442  | Transketolase                                                            | TKT      | 0.84±0.14 | 0.57±0.06 | 1.47 |
| C2_824    | Transketolase-like protein 2                                             | TKTL2    | 0.77±0.08 | 0.95±0.08 | 0.81 |
| C2_44506  | Translational activator GCN1                                             | GCN1L1   | 0.99±0.09 | 1.22±0.23 | 0.82 |
| C2_58570  | Translational activator GCN1                                             | GCN1L1   | 0.77±0.09 | 0.93±0.17 | 0.83 |
| C2_16615  | Translational activator GCN1                                             | GCN1L1   | 0.75±0.11 | 0.74±0.13 | 1.01 |
| C2_8982   | Translational activator GCN1                                             | GCN1L1   | 0.81±0.08 | 0.56±0.03 | 1.44 |
| C2_15     | Translationaly-controlled tumor protein homolog                          | TPT1     | 0.82±0.07 | 0.8±0.06  | 1.03 |
| C2_23686  | Translin                                                                 | TSN      | 0.81±0.11 | 0.47±0.07 | 1.71 |
| C2_28067  | Translin-associated protein X                                            | TSNAX    | 0.74±0.14 | 0.42±0.05 | 1.76 |
| C2_258    | Translocon-associated protein subunit beta                               | SSR2     | 1.54±0.22 | 0.82±0.07 | 1.88 |
| C2_49400  | Transmembrane 6 superfamily member 2                                     | TM6SF2   | 1.25±0.2  | 0.7±0.05  | 1.79 |
| C2_3796   | Transmembrane 9 superfamily member 3                                     | TM9SF3   | 1.53±0.29 | 0.85±0.05 | 1.80 |
| C2_671    | Transmembrane and immunoglobulin domain-containing protein 1             | TMIGD1   | 0.88±0.11 | 1.31±0.13 | 0.67 |
| C2_39395  | Transmembrane channel-like protein 8                                     | TMC8     | 1.13±0.13 | 0.76±0.13 | 1.48 |



|           |                                                                       |               |           |            |      |
|-----------|-----------------------------------------------------------------------|---------------|-----------|------------|------|
| C2_12865  | Transmembrane emp24 domain-containing protein 2                       | TMED2         | 0.96±0.02 | 0.53±0.06  | 1.81 |
| C2_2279   | Transmembrane emp24 domain-containing protein 7                       | TMED7         | 1.36±0.21 | 1.21±0.1   | 1.13 |
| C2_48280  | Transmembrane protease serine 4                                       | TMPRSS4       | 0.93±0.06 | 0.61±0.05  | 1.51 |
| C2_2859   | Transmembrane protein 135                                             | TMEM135       | 1.17±0.11 | 1.74±0.23  | 0.67 |
| C2_4100   | Transmembrane protein 14A                                             | TMEM14A       | 0.72±0.13 | 0.3±0.02   | 2.39 |
| C2_25549  | Transmembrane protein C10orf57 homolog                                | CJ057         | 1.04±0.16 | 0.6±0.19   | 1.72 |
| C2_43636  | Transportin-2                                                         | TNPO2         | 0.93±0.07 | 1.91±0.32  | 0.49 |
| C2_22440  | Transportin-3                                                         | TNPO3         | 0.95±0.08 | 1.32±0.18  | 0.72 |
| C2_75383  | Transthyretin                                                         | TTR           | 1.03±0.08 | 0.68±0.07  | 1.52 |
| C2_5754   | Trehalase                                                             | TREH          | 0.5±0.17  | 0.31±0.04  | 1.60 |
| C2_10341  | Tricarboxylate transport protein, mitochondrial                       | Slc25a1       | 1.25±0.24 | 0.41±0.07  | 3.05 |
| C2_3043   | Trifunctional enzyme subunit alpha, mitochondrial                     | HADHA         | 1.43±0.3  | 0.8±0.04   | 1.78 |
| C2_2435   | Trifunctional enzyme subunit beta, mitochondrial                      | HADHB         | 1.28±0.21 | 1.15±0.06  | 1.11 |
| C2_14515  | Trimethyllysine dioxygenase, mitochondrial                            | TMLHE         | 0.89±0.09 | 1.28±0.11  | 0.70 |
| C2_52     | Triosephosphate isomerase B                                           | TPI1          | 0.98±0.09 | 0.5±0.05   | 1.95 |
| C2_114171 | Tripartite motif-containing protein 14                                | TRIM14        | 0.98±0.1  | 0.67±0.05  | 1.47 |
| C2_7955   | Tripartite motif-containing protein 16                                | TRIM16        | 0.77±0.08 | 0.78±0.05  | 0.99 |
| C2_10685  | Tripartite motif-containing protein 29                                | TRIM29        | 1.32±0.14 | 2.01±0.07  | 0.65 |
| C2_1412   | Tripeptidyl-peptidase 1                                               | TPP1          | 0.9±0.07  | 0.56±0.03  | 1.60 |
| C2_27720  | Tripeptidyl-peptidase 2                                               | TPP2          | 0.98±0.08 | 0.99±0.07  | 0.99 |
| C2_26986  | tRNA (adenine-N(1)-)-methyltransferase non-catalytic subunit TRM6     | TRMT6         | 1.31±0.12 | 1.13±0.12  | 1.15 |
| C2_15864  | tRNA-splicing ligase RtcB homolog                                     | RTCB          | 0.9±0.03  | 1.21±0.04  | 0.75 |
| C2_44653  | Tropomyosin alpha-4 chain                                             | Tpm4          | 4.79±2.01 | 23.02±8.65 | 0.21 |
| C2_437    | Tropomyosin beta chain                                                | Tpm2          | 1.26±0.21 | 2.31±0.47  | 0.55 |
| C2_1213   | Trypsin                                                               | 2210010C04Rik | 0.56±0.17 | 0.31±0.08  | 1.85 |
| C2_84054  | Trypsin-1                                                             | PRSS1         | 0.47±0.19 | 0.18±0.06  | 2.58 |
| C2_121419 | Trypsin-2                                                             | PRSS2         | 0.57±0.17 | 0.29±0.08  | 1.98 |
| C2_4459   | Trypsin-3                                                             | PRSS3         | 0.55±0.17 | 0.25±0.05  | 2.20 |
| C3_c41957 | Trypsinogen-like protein 3                                            | PRSS3         | 0.46±0.18 | 0.31±0.04  | 1.49 |
| C2_1950   | Tryptase                                                              | Tpsab1        | 0.67±0.11 | 0.48±0.04  | 1.41 |
| C2_1646   | Tryptophanyl-tRNA synthetase, cytoplasmic                             | WARS          | 0.79±0.08 | 0.85±0.03  | 0.93 |
| C2_101373 | Tubulin alpha-1 chain                                                 | TUBA1A        | 0.95±0.06 | 1.03±0.06  | 0.93 |
| C2_38179  | Tubulin alpha-1A chain                                                | TUBA1A        | 1.55±0.33 | 1.86±0.28  | 0.83 |
| C2_7711   | Tubulin alpha-1B chain                                                | TUBA1B        | 1.42±0.23 | 2.23±0.46  | 0.64 |
| C2_100383 | Tubulin alpha-2 chain                                                 | TUBA2         | 1.13±0.05 | 1.22±0.07  | 0.93 |
| C2_20113  | Tubulin alpha-4A chain                                                | TUBA4A        | 1.48±0.3  | 2.96±1.21  | 0.50 |
| C2_905    | Tubulin beta chain                                                    | TUBB          | 0.82±0.08 | 1.29±0.32  | 0.64 |
| C2_90     | Tubulin beta-1 chain                                                  | TUBB1         | 1.4±0.25  | 3.07±1.7   | 0.46 |
| C2_8011   | Tubulin beta-7 chain                                                  | TUBB7         | 0.88±0.04 | 1.05±0.17  | 0.84 |
| C2_2978   | Tubulin-folding cofactor B                                            | TBCB          | 1.28±0.21 | 2.22±0.06  | 0.58 |
| C2_1292   | Tubulin-specific chaperone A                                          | TBCA          | 0.73±0.1  | 0.99±0.24  | 0.73 |
| C2_2326   | Tumor necrosis factor receptor type 1-associated DEATH domain protein | TRADD         | 0.81±0.09 | 1.11±0.22  | 0.73 |
| C2_6149   | Tumor protein D52                                                     | TPD52         | 0.86±0.18 | 0.65±0.13  | 1.33 |
| C2_20971  | Tumor protein D54                                                     | TPD52L2       | 0.6±0.14  | 0.33±0.02  | 1.84 |
| C2_6726   | Tumor susceptibility gene 101 protein                                 | TSG101        | 1.27±0.11 | 1.33±0.07  | 0.96 |
| C2_877    | Tumor-associated calcium signal transducer 2                          | TACSTD2       | 1.13±0.13 | 0.94±0.03  | 1.21 |
| C2_6143   | Twinfilin-1                                                           | TWF1          | 1.22±0.14 | 2.81±0.45  | 0.43 |
| C2_3281   | Type II inositol-1,4,5-trisphosphate 5-phosphatase                    | INPP5B        | 1±0.02    | 0.9±0.03   | 1.11 |
| C2_12783  | Type-4 ice-structuring protein LS-12                                  | AFP4          | 1.02±0.12 | 2.41±1.81  | 0.42 |
| C2_2163   | Tyrosine-protein kinase CSK                                           | CSK           | 0.97±0.03 | 0.94±0.07  | 1.02 |
| C2_90526  | Tyrosine-protein kinase Yes                                           | YES1          | 1.26±0.22 | 1.51±0.11  | 0.84 |
| C2_16846  | Tyrosine-protein phosphatase non-receptor type 11                     | PTPN11        | 1.34±0.2  | 1.67±0.14  | 0.80 |
| C2_731    | Tyrosine-protein phosphatase non-receptor type 6                      | PTPN6         | 1.49±0.29 | 1.25±0.06  | 1.19 |
| C2_28595  | U1 small nuclear ribonucleoprotein 70 kDa                             | SNRNP70       | 0.65±0.13 | 0.76±0.17  | 0.86 |
| C2_6732   | U1 small nuclear ribonucleoprotein A                                  | Snrpa         | 0.78±0.07 | 0.64±0.06  | 1.22 |
| C2_20155  | U5 small nuclear ribonucleoprotein 200 kDa helicase                   | SNRNP200      | 1.02±0.06 | 1±0.07     | 1.02 |
| C2_31571  | U5 small nuclear ribonucleoprotein 200 kDa helicase                   | SNRNP200      | 2.39±0.6  | 2.13±0.3   | 1.12 |
| C2_5077   | U5 small nuclear ribonucleoprotein 200 kDa helicase                   | SNRNP200      | 1.02±0.19 | 0.65±0.18  | 1.57 |
| C2_3229   | U6 snRNA-associated Sm-like protein LSm1                              | LSM1          | 0.99±0.03 | 0.99±0.02  | 1.00 |
| C2_28803  | U6 snRNA-associated Sm-like protein LSm2                              | LSM2          | 0.78±0.1  | 0.52±0.05  | 1.50 |
| C2_26124  | U6 snRNA-associated Sm-like protein LSm3                              | LSM3          | 0.98±0.01 | 0.92±0.04  | 1.06 |
| C2_4328   | U6 snRNA-associated Sm-like protein LSm4                              | LSM4          | 0.89±0.05 | 0.72±0.09  | 1.23 |
| C2_55073  | U6 snRNA-associated Sm-like protein LSm5                              | LSM5          | 0.98±0.08 | 0.82±0.04  | 1.20 |
| C2_53085  | U6 snRNA-associated Sm-like protein LSm6                              | LSM6          | 0.81±0.07 | 0.66±0.02  | 1.23 |
| C2_3362   | U6 snRNA-associated Sm-like protein LSm7                              | LSM7          | 0.72±0.1  | 0.63±0.04  | 1.13 |

|           |                                                                                   |              |           |           |      |
|-----------|-----------------------------------------------------------------------------------|--------------|-----------|-----------|------|
| C2_19544  | Ubiquilin-1                                                                       | UBQLN1       | 0.93±0.06 | 1.01±0.06 | 0.92 |
| C2_2288   | Ubiquilin-2                                                                       | UBQLN2       | 1.25±0.17 | 1.41±0.04 | 0.88 |
| C2_3405   | Ubiquinone biosynthesis protein COQ9, mitochondrial                               | COQ9         | 1.35±0.16 | 0.64±0.04 | 2.09 |
| C2_6289   | Ubiquitin carboxyl-terminal hydrolase 10                                          | USP10        | 0.51±0.16 | 0.48±0.1  | 1.07 |
| C2_1964   | Ubiquitin carboxyl-terminal hydrolase 14                                          | USP14        | 1.26±0.13 | 2.21±0.25 | 0.57 |
| C2_107070 | Ubiquitin carboxyl-terminal hydrolase 21                                          | USP21        | 1.61±0.29 | 10.1±5.41 | 0.16 |
| C2_44713  | Ubiquitin carboxyl-terminal hydrolase 4                                           | USP4         | 1.2±0.09  | 1.72±0.06 | 0.70 |
| C2_27032  | Ubiquitin carboxyl-terminal hydrolase 47                                          | USP47        | 1.16±0.15 | 1.37±0.04 | 0.85 |
| C2_20830  | Ubiquitin carboxyl-terminal hydrolase 5                                           | USP5         | 1.28±0.14 | 1.97±0.33 | 0.65 |
| C2_48312  | Ubiquitin carboxyl-terminal hydrolase 7                                           | USP7         | 0.95±0.19 | 2.53±0.77 | 0.38 |
| C2_18831  | Ubiquitin carboxyl-terminal hydrolase 7                                           | USP7         | 0.88±0.09 | 0.62±0.07 | 1.42 |
| C2_660    | Ubiquitin carboxyl-terminal hydrolase isozyme L3                                  | UCHL3        | 1.29±0.15 | 2.13±0.02 | 0.61 |
| C2_1022   | Ubiquitin carboxyl-terminal hydrolase isozyme L5                                  | UCHL5        | 1.22±0.12 | 2.3±0.15  | 0.53 |
| C2_13539  | Ubiquitin conjugation factor E4 A                                                 | UBE4A        | 1.08±0.07 | 0.81±0.1  | 1.33 |
| C2_7265   | Ubiquitin conjugation factor E4 B                                                 | UBE4B        | 0.74±0.11 | 1.15±0.16 | 0.65 |
| C2_470    | Ubiquitin fusion degradation protein 1 homolog                                    | UFD1L        | 0.97±0.06 | 0.59±0.06 | 1.64 |
| C2_155    | Ubiquitin thioesterase OTUB1                                                      | Otub1        | 1.11±0.07 | 1.96±0.17 | 0.56 |
| C2_648    | Ubiquitin-60S ribosomal protein L40                                               | Uba52        | 0.91±0.18 | 0.49±0.07 | 1.84 |
| C2_10454  | Ubiquitin-associated protein 1                                                    | UBAP1        | 0.67±0.11 | 0.61±0.05 | 1.10 |
| C2_5227   | Ubiquitin-conjugating enzyme E2 D2                                                | UBE2D2       | 1.23±0.13 | 1.56±0.1  | 0.79 |
| C2_4604   | Ubiquitin-conjugating enzyme E2 K                                                 | UBE2K        | 0.9±0.05  | 1.27±0.05 | 0.71 |
| C2_6947   | Ubiquitin-conjugating enzyme E2 L3                                                | UBE2L3       | 1.52±0.35 | 2.56±0.19 | 0.59 |
| C2_17030  | Ubiquitin-conjugating enzyme E2 N                                                 | UBE2N        | 1.07±0.08 | 1.95±0.41 | 0.55 |
| C2_1249   | Ubiquitin-conjugating enzyme E2 variant 1                                         | UBE2V1       | 0.87±0.11 | 0.78±0.09 | 1.12 |
| C2_1363   | Ubiquitin-conjugating enzyme E2 variant 2                                         | UBE2V2       | 1.19±0.18 | 2.52±0.38 | 0.47 |
| C2_112839 | Ubiquitin-conjugating enzyme E2-18 kDa                                            | UBE2G2       | 0.84±0.09 | 1.05±0.19 | 0.80 |
| C2_9630   | Ubiquitin-fold modifier 1                                                         | UFM1         | 0.87±0.05 | 1.29±0.19 | 0.67 |
| C2_8231   | Ubiquitin-like modifier-activating enzyme 1                                       | UBA1         | 1.21±0.12 | 1.96±0.13 | 0.62 |
| C2_39433  | Ubiquitin-like modifier-activating enzyme 6                                       | UBA6         | 0.7±0.1   | 0.76±0.07 | 0.92 |
| C2_6707   | Ubiquitin-like modifier-activating enzyme ATG7                                    | ATG7         | 0.87±0.08 | 1.58±0.25 | 0.55 |
| C2_4528   | Ubiquitin-like protein 3                                                          | UBL3         | 1.03±0.13 | 0.67±0.06 | 1.54 |
| C2_29802  | Ubiquitin-like protein FUBI                                                       | FAU          | 2.2±0.57  | 2.19±0.26 | 1.00 |
| C2_5019   | Ubiquitin-like-conjugating enzyme ATG3                                            | ATG3         | 0.97±0.04 | 1.49±0.22 | 0.65 |
| C2_13734  | UBX domain-containing protein 1                                                   | UBXN1        | 1.67±0.43 | 2.9±0.31  | 0.58 |
| C2_7714   | UDP-glucose 4-epimerase                                                           | GALE         | 1.04±0.03 | 1.16±0.05 | 0.89 |
| C2_11633  | UDP-glucose 6-dehydrogenase                                                       | UGDH         | 3.23±0.85 | 1.5±0.16  | 2.15 |
| C2_57655  | UDP-glucose:glycoprotein glucosyltransferase 1                                    | UGGT1        | 5.35±1.58 | 2.86±0.36 | 1.87 |
| C2_3599   | UDP-glucuronosyltransferase                                                       | UGT1A1       | 1.36±0.21 | 0.26±0.01 | 5.27 |
| C2_15625  | UDP-glucuronosyltransferase 1-6                                                   | UGT1A6       | 1.12±0.09 | 0.64±0.04 | 1.74 |
| C2_12213  | UDP-glucuronosyltransferase 1-9                                                   | UGT1A9       | 1.25±0.13 | 0.75±0.09 | 1.66 |
| C2_7856   | UDP-glucuronosyltransferase 2A1                                                   | UGT2A1       | 1.25±0.16 | 0.48±0.02 | 2.59 |
| C2_5354   | UDP-glucuronosyltransferase 2A2                                                   | UGT2A2       | 1.11±0.12 | 0.39±0.02 | 2.86 |
| C2_24614  | UDP-glucuronosyltransferase 2A3                                                   | UGT2A3       | 0.63±0.13 | 0.45±0.05 | 1.42 |
| C2_54573  | UDP-glucuronosyltransferase 2B15                                                  | UGT2B7       | 1.16±0.12 | 0.35±0.02 | 3.33 |
| C2_16491  | UDP-glucuronosyltransferase 2B17                                                  | UGT2B17      | 1.27±0.09 | 0.87±0.09 | 1.46 |
| C2_111727 | UDP-glucuronosyltransferase 2B17                                                  | UGT2B17      | 1.13±0.13 | 0.41±0.01 | 2.73 |
| C2_4592   | UDP-N-acetylglucosamine--dolichyl-phosphate N-acetylglucosaminophosphotransferase | DPAGT1       | 1.3±0.29  | 0.56±0.12 | 2.31 |
| C2_12651  | UDP-N-acetylhexosamine pyrophosphorylase                                          | UAP1         | 2.02±0.42 | 2.31±0.39 | 0.88 |
| C2_7433   | UDP-N-acetylhexosamine pyrophosphorylase-like protein 1                           | UAP1L1       | 0.81±0.07 | 1.59±0.19 | 0.51 |
| C2_9914   | Ufm1-specific protease 2                                                          | UFSP2        | 0.84±0.06 | 0.86±0.04 | 0.97 |
| C2_6090   | UMP-CMP kinase                                                                    | CMPK1        | 1.04±0.09 | 2.61±1.46 | 0.40 |
| C2_5879   | Uncharacterized methyltransferase ydaC                                            | ydaC         | 0.84±0.09 | 0.59±0.04 | 1.42 |
| C2_3672   | Uncharacterized oxidoreductase C663.06c                                           | SPCC663.06c  | 1.39±0.16 | 0.74±0.03 | 1.87 |
| C2_10013  | Uncharacterized oxidoreductase YtbE                                               | ytbE         | 1.03±0.03 | 1.34±0.12 | 0.76 |
| C2_12162  | Uncharacterized protein C18H10.09                                                 | SPBC18H10.09 | 0.78±0.08 | 0.72±0.04 | 1.09 |
| C2_79778  | Uncharacterized protein C6orf106                                                  | C6orf106     | 0.69±0.12 | 0.46±0.08 | 1.51 |
| C2_23974  | Uncharacterized protein KIAA2013 homolog                                          | KIAA2013     | 0.99±0.12 | 0.49±0.02 | 2.03 |
| C2_12864  | Uncharacterized protein LOC388588 homolog                                         | LOC388588    | 1.29±0.25 | 0.48±0.06 | 2.72 |
| C2_11954  | Uncharacterized protein MJ0240                                                    | BN478_00635  | 1.84±0.45 | 2.28±0.12 | 0.80 |
| C2_35646  | Uncharacterized protein R102.4                                                    | Tha1         | 0.53±0.16 | 0.47±0.08 | 1.13 |
| C3_c35178 | Unconventional myosin-VIIa                                                        | MYO7A        | 1.59±0.33 | 1.5±0.11  | 1.06 |
| C2_9334   | UPF0160 protein MYG1, mitochondrial                                               | C12orf10     | 0.81±0.1  | 0.43±0.03 | 1.88 |
| C2_6389   | UPF0308 protein C9orf21                                                           | C9orf21      | 1.13±0.15 | 0.98±0.21 | 1.15 |
| C2_5361   | UPF0364 protein C6orf211 homolog                                                  | C6orf211     | 1.14±0.11 | 1.63±0.21 | 0.70 |
| C2_5574   | UPF0366 protein C11orf67 homolog                                                  | C11orf67     | 0.67±0.11 | 0.86±0.03 | 0.78 |
| C2_53467  | UPF0405 protein C3orf75 homolog                                                   | ELP6         | 1.17±0.23 | 2.53±0.26 | 0.46 |

|           |                                                                |           |            |           |      |
|-----------|----------------------------------------------------------------|-----------|------------|-----------|------|
| C2_5877   | UPF0462 protein C4orf33 homolog                                | C4orf33   | 0.49±0.17  | 0.33±0.06 | 1.49 |
| C2_6009   | UPF0466 protein C22orf32 homolog, mitochondrial                | SMDT1     | 1.41±0.16  | 0.93±0.14 | 1.51 |
| C2_2787   | UPF0468 protein C16orf80 homolog                               | C16orf80  | 1.12±0.12  | 0.55±0.08 | 2.03 |
| C2_41651  | UPF0505 protein C16orf62 homolog                               | C16orf62  | 0.94±0.04  | 1.86±0.45 | 0.50 |
| C2_83574  | UPF0505 protein C16orf62 homolog                               | C16orf62  | 0.93±0.06  | 1.61±0.09 | 0.58 |
| C2_9851   | UPF0533 protein C5orf44 homolog                                | C5orf44   | 52.87±17.6 | 76.65±8.3 | 0.69 |
| C2_19805  | UPF0552 protein C15orf38 homolog                               | C15orf38  | 1.44±0.22  | 2.42±0.16 | 0.60 |
| C2_31615  | UPF0553 protein C9orf64 homolog                                | C9orf64   | 1.09±0.03  | 0.79±0.06 | 1.37 |
| C2_10677  | UPF0554 protein C2orf43 homolog                                | C2orf43   | 1.09±0.09  | 0.77±0.04 | 1.41 |
| C2_2220   | UPF0556 protein C19orf10 homolog                               | C19orf10  | 0.89±0.2   | 0.24±0.04 | 3.72 |
| C2_2379   | UPF0568 protein C14orf166 homolog                              | C14orf166 | 0.97±0.07  | 1.19±0.26 | 0.81 |
| C2_5897   | UPF0587 protein C1orf123                                       | C1orf123  | 0.79±0.08  | 0.69±0.03 | 1.14 |
| C2_22308  | UPF0668 protein C10orf76 homolog                               | C10orf76  | 0.8±0.09   | 0.71±0.1  | 1.12 |
| C2_2273   | UPF0765 protein C10orf58 homolog                               | C10orf58  | 1.09±0.1   | 0.38±0.04 | 2.85 |
| C2_15956  | Up-regulator of cell proliferation                             | URGCP     | 0.98±0.05  | 0.76±0.07 | 1.29 |
| C2_1340   | Uridine phosphorylase 1                                        | UPP1      | 1.01±0.03  | 1.32±0.13 | 0.77 |
| C2_491    | Uroporphyrinogen decarboxylase                                 | UROD      | 1.01±0.03  | 1.22±0.05 | 0.82 |
| C2_355    | Uroporphyrinogen-III synthase                                  | UROS      | 0.98±0.04  | 1.02±0.18 | 0.96 |
| C2_4863   | UTP--glucose-1-phosphate uridylyltransferase                   | UGP2      | 1.55±0.28  | 2.94±0.17 | 0.53 |
| C2_20296  | UV excision repair protein RAD23 homolog A                     | RAD23A    | 1.63±0.26  | 3.06±0.01 | 0.53 |
| C2_15352  | UV excision repair protein RAD23 homolog B                     | RAD23B    | 0.64±0.14  | 0.89±0.28 | 0.72 |
| C2_4908   | Vacuolar protein sorting-associated protein 11 homolog         | VPS11     | 0.81±0.09  | 0.86±0.08 | 0.93 |
| C2_14960  | Vacuolar protein sorting-associated protein 13A                | VPS13A    | 1.08±0.04  | 0.85±0.05 | 1.27 |
| C2_12800  | Vacuolar protein sorting-associated protein 13C                | VPS13C    | 1.05±0.06  | 1.05±0.11 | 1.00 |
| C2_81516  | Vacuolar protein sorting-associated protein 13D                | VPS13D    | 1.66±0.32  | 2.13±0.34 | 0.78 |
| C2_3947   | Vacuolar protein sorting-associated protein 16 homolog         | VPS16     | 0.89±0.11  | 0.62±0.03 | 1.44 |
| C2_4890   | Vacuolar protein sorting-associated protein 18 homolog         | VPS18     | 0.84±0.08  | 0.83±0.04 | 1.01 |
| C2_13056  | Vacuolar protein sorting-associated protein 26B-B              | VPS26B    | 1.38±0.14  | 1.82±0.04 | 0.76 |
| C2_8488   | Vacuolar protein sorting-associated protein 26B-like           | VPS26BL   | 1.18±0.07  | 1.66±0.12 | 0.71 |
| C2_1930   | Vacuolar protein sorting-associated protein 28 homolog         | VPS28     | 1.02±0.04  | 1.38±0.19 | 0.74 |
| C2_6316   | Vacuolar protein sorting-associated protein 29                 | VPS29     | 0.96±0.05  | 0.81±0.06 | 1.18 |
| C2_2873   | Vacuolar protein sorting-associated protein 33A                | VPS33A    | 0.71±0.1   | 0.85±0.09 | 0.83 |
| C2_3610   | Vacuolar protein sorting-associated protein 35                 | VPS35     | 0.95±0.02  | 1.71±0.17 | 0.56 |
| C2_23478  | Vacuolar protein sorting-associated protein 35                 | VPS35     | 1.03±0.05  | 1.56±0.18 | 0.66 |
| C2_12026  | Vacuolar protein sorting-associated protein 37A                | VPS37A    | 0.83±0.08  | 0.71±0.06 | 1.17 |
| C2_3186   | Vacuolar protein sorting-associated protein 41 homolog         | VPS41     | 0.53±0.16  | 0.38±0.07 | 1.41 |
| C2_7439   | Vacuolar protein sorting-associated protein 45                 | VPS45     | 1.18±0.16  | 0.97±0.21 | 1.21 |
| C2_2867   | Vacuolar protein sorting-associated protein 4B                 | VPS4B     | 0.98±0.02  | 1.93±0.17 | 0.51 |
| C2_19718  | Vacuolar protein sorting-associated protein 53 homolog         | VPS53     | 1.01±0.07  | 1.76±0.31 | 0.57 |
| C2_36362  | Vacuolar protein sorting-associated protein 8 homolog          | VPS8      | 0.84±0.08  | 0.97±0.18 | 0.86 |
| C2_9965   | Vacuolar protein sorting-associated protein VTA1 homolog       | VTA1      | 0.87±0.05  | 1.08±0.06 | 0.81 |
| C2_1783   | Vacuolar protein-sorting-associated protein 25                 | VPS25     | 1.12±0.07  | 1.54±0.04 | 0.73 |
| C2_4706   | Vacuolar protein-sorting-associated protein 36                 | VPS36     | 1.16±0.06  | 1.56±0.1  | 0.74 |
| C2_6246   | Vacuolar-sorting protein SNF8                                  | SNF8      | 0.76±0.12  | 0.65±0.12 | 1.17 |
| C2_5432   | Valyl-tRNA synthetase                                          | VAR52     | 1.04±0.03  | 0.85±0.07 | 1.22 |
| C2_57229  | Vasodilator-stimulated phosphoprotein                          | VASP      | 1.88±0.38  | 3.06±0.18 | 0.61 |
| C2_6700   | Very long-chain acyl-CoA synthetase                            | SLC27A2   | 1.2±0.08   | 1.15±0.07 | 1.04 |
| C2_47981  | Very long-chain specific acyl-CoA dehydrogenase, mitochondrial | ACADVL    | 0.91±0.05  | 0.45±0.04 | 2.01 |
| C2_5562   | Very long-chain specific acyl-CoA dehydrogenase, mitochondrial | ACADVL    | 0.85±0.12  | 0.3±0.02  | 2.84 |
| C2_7834   | Vesicle-associated membrane protein-associated protein A       | VAPA      | 1.27±0.17  | 0.74±0.05 | 1.72 |
| C2_3642   | Vesicle-associated membrane protein-associated protein B       | VAPB      | 1.58±0.29  | 1.42±0.09 | 1.11 |
| C2_4322   | Vesicle-associated membrane protein-associated protein B/C     | VAPB      | 1.73±0.33  | 1.16±0.09 | 1.48 |
| C2_8296   | Vesicle-fusing ATPase                                          | NSF       | 1.18±0.11  | 1.55±0.07 | 0.76 |
| C2_65101  | Vesicle-fusing ATPase                                          | NSF       | 1±0.2      | 0.96±0.22 | 1.04 |
| C2_3873   | Vesicular integral-membrane protein VIP36                      | LMAN2     | 1.11±0.06  | 0.59±0.05 | 1.88 |
| C2_1304   | Vigilin                                                        | HDLBP     | 1.02±0.03  | 1.18±0.23 | 0.87 |
| C2_10632  | Villin-1                                                       | VIL1      | 2.02±0.45  | 2.09±0.17 | 0.97 |
| C2_61501  | Villin-1                                                       | VIL1      | 0.9±0.11   | 0.93±0.09 | 0.97 |
| C2_9594   | Vinculin                                                       | VCL       | 1.31±0.13  | 1.92±0.11 | 0.68 |
| C2_44280  | Vinculin                                                       | VCL       | 0.94±0.05  | 1.28±0.09 | 0.73 |
| FP335499  | Vitamin K-dependent protein S                                  | PROS1     | 1.04±0.04  | 1.03±0.13 | 1.02 |
| C2_318    | Voltage-dependent anion-selective channel protein 1            | VDAC1     | 1.25±0.19  | 0.68±0.06 | 1.83 |
| C2_661    | Voltage-dependent anion-selective channel protein 2            | VDAC2     | 1.55±0.31  | 0.46±0.04 | 3.35 |
| C2_1494   | Voltage-dependent anion-selective channel protein 2            | VDAC2     | 1.64±0.43  | 0.47±0.04 | 3.49 |
| C2_119048 | Voltage-dependent anion-selective channel protein 3            | VDAC3     | 2±0.48     | 0.39±0.02 | 5.09 |
| C2_15635  | von Willebrand factor A domain-containing protein 5A           | VWASA     | 0.89±0.05  | 0.64±0.02 | 1.39 |
| C2_2397   | von Willebrand factor A domain-containing protein 5A           | VWASA     | 0.77±0.08  | 0.35±0.03 | 2.21 |

|           |                                                                |          |           |           |      |
|-----------|----------------------------------------------------------------|----------|-----------|-----------|------|
| C2_112999 | V-set domain containing T-cell activation inhibitor 1          | VTCN1    | 0.82±0.1  | 0.63±0.07 | 1.29 |
| C2_3806   | V-type proton ATPase catalytic subunit A                       | ATP6V1A  | 1±0.03    | 2.04±0.38 | 0.49 |
| C2_1084   | V-type proton ATPase subunit B                                 | ATP6V0A4 | 0.99±0.04 | 1.63±0.52 | 0.61 |
| C2_46438  | V-type proton ATPase subunit C 1                               | ATP6V1C1 | 1.01±0.11 | 1.47±0.21 | 0.69 |
| C2_5388   | V-type proton ATPase subunit C 1-A                             | ATP6V1C1 | 1.26±0.16 | 2.4±0.08  | 0.53 |
| C2_5241   | V-type proton ATPase subunit E 1                               | ATP6V0E1 | 0.92±0.04 | 1.33±0.22 | 0.69 |
| C2_1898   | V-type proton ATPase subunit F                                 | ATP6V1F  | 0.94±0.14 | 1.29±0.15 | 0.73 |
| C2_18009  | V-type proton ATPase subunit G 1                               | ATP6V1G1 | 1.38±0.16 | 4.08±1.24 | 0.34 |
| C2_275    | V-type proton ATPase subunit H                                 | ATP6V1H  | 0.89±0.04 | 1.39±0.17 | 0.64 |
| C2_9309   | WASH complex subunit 7                                         | KIAA1033 | 0.99±0.01 | 1.29±0.15 | 0.76 |
| C2_9579   | WASH complex subunit strumpellin                               | KIAA0196 | 0.82±0.06 | 1.27±0.07 | 0.65 |
| C2_19854  | WASH complex subunit strumpellin                               | KIAA0196 | 1.07±0.05 | 1.4±0.19  | 0.76 |
| C2_27168  | WD repeat and FYVE domain-containing protein 1                 | WDFY1    | 0.74±0.09 | 0.45±0.07 | 1.64 |
| C2_2247   | WD repeat domain phosphoinositide-interacting protein 2        | WIPI2    | 0.98±0.06 | 0.87±0.11 | 1.13 |
| C2_15764  | WD repeat domain phosphoinositide-interacting protein 3        | WDR45B   | 0.95±0.06 | 1.48±0.05 | 0.64 |
| C2_1420   | WD repeat-containing protein 1                                 | WDR1     | 0.77±0.09 | 0.44±0.05 | 1.75 |
| C2_15039  | WD repeat-containing protein 26                                | WDR26    | 1.41±0.14 | 3.07±0.3  | 0.46 |
| C2_97790  | WD repeat-containing protein 26                                | WDR26    | 0.93±0.06 | 0.53±0.04 | 1.75 |
| C2_5847   | WD repeat-containing protein 5                                 | WDR5     | 0.79±0.09 | 0.6±0.06  | 1.32 |
| C2_1995   | WD repeat-containing protein 61                                | WDR61    | 0.76±0.08 | 0.65±0.05 | 1.18 |
| C2_7451   | WD repeat-containing protein 82                                | WDR82    | 0.96±0.1  | 0.78±0.04 | 1.23 |
| C2_3782   | WD repeat-containing protein 91                                | WDR91    | 1.2±0.08  | 1.86±0.05 | 0.64 |
| C2_67434  | WW domain-binding protein 2                                    | WBP2     | 0.86±0.05 | 0.93±0.05 | 0.93 |
| C2_4369   | Xaa-Pro aminopeptidase 1                                       | XPNPEP1  | 0.86±0.09 | 0.86±0.09 | 1.00 |
| C2_2468   | Xaa-Pro aminopeptidase 2                                       | XPNPEP2  | 0.52±0.16 | 0.42±0.06 | 1.24 |
| C2_1116   | Xaa-Pro dipeptidase                                            | PEPD     | 0.77±0.16 | 0.9±0.09  | 0.85 |
| C2_17124  | Xanthine dehydrogenase/oxidase                                 | XDH      | 0.87±0.12 | 0.81±0.03 | 1.08 |
| C2_10177  | Xylose isomerase                                               | XYLA     | 0.85±0.12 | 0.9±0.1   | 0.94 |
| C2_8299   | Xylulose kinase                                                | XYLB     | 0.97±0.06 | 1.44±0.18 | 0.67 |
| C2_35539  | Zinc finger protein RFP                                        | TRIM27   | 0.85±0.06 | 0.87±0.04 | 0.97 |
| C3_c25709 | Zinc finger ZZ-type and EF-hand domain-containing protein 1    | ZZEF1    | 0.88±0.08 | 0.91±0.08 | 0.97 |
| C2_46479  | Zinc finger ZZ-type and EF-hand domain-containing protein 1    | ZZEF1    | 0.79±0.07 | 0.68±0.03 | 1.17 |
| C2_16098  | Zinc-binding alcohol dehydrogenase domain-containing protein 2 | ZADH2    | 1.25±0.09 | 0.72±0.03 | 1.75 |
| C2_90139  | Zonadhesin                                                     | ZAN      | 0.78±0.08 | 0.59±0.03 | 1.32 |
| C2_2605   | Zonadhesin                                                     | ZAN      | 0.77±0.09 | 0.54±0.02 | 1.44 |
| C2_39339  | Zonadhesin                                                     | ZAN      | 0.6±0.14  | 0.37±0.04 | 1.63 |
