# Supplementary material for: Under control: how a dietary additive can restore the gut microbiome and proteomic profile, and improve disease resilience in a marine teleostean fish fed vegetable diets
Source: Springer Nature journal article supplement (doi:10.1186/s40168-017-0390-3), 2017-12-01
Supplement: MOESM8 [file 40168_2017_390_MOESM8_ESM.pdf]

Table S3. List of proteins detected in anterior intestine samples. Data on protein expression are mean  $\pm$  SEM of 6 fish fed the experimental diets. The number of the contig in the Sea Bream Database (<http://nutrigrp-iats.org/seabreamdb>) is indicated.

| Contig   | Protein Description                                               | Symbol   | Diet      |           |           |           |
|----------|-------------------------------------------------------------------|----------|-----------|-----------|-----------|-----------|
|          |                                                                   |          | D1        | D2        | D3        | D4        |
| C2_299   | 14-3-3 protein beta/alpha-1                                       | YWHAB    | 0.93±0.30 | 1.66±0.38 | 1.50±0.24 | 1.26±0.28 |
| C2_268   | 14-3-3 protein epsilon                                            | YWHAE    | 0.91±0.07 | 1.31±0.22 | 0.92±0.07 | 1.12±0.15 |
| C2_2474  | 14-3-3 protein gamma-1                                            | YWHAG    | 0.77±0.08 | 1.39±0.32 | 1.02±0.16 | 1.28±0.20 |
| C2_1017  | 14-3-3 protein zeta                                               | YWHAZ    | 0.65±0.11 | 0.91±0.09 | 0.90±0.13 | 0.83±0.09 |
| C2_34474 | 14-3-3-like protein 2                                             | YWHAQ    | 1.09±0.19 | 0.73±0.18 | 1.36±0.41 | 1.25±0.40 |
| C2_4902  | 17-beta-hydroxysteroid dehydrogenase 14                           | HSD17B14 | 1.09±0.30 | 1.16±0.18 | 0.93±0.05 | 1.16±0.11 |
| C2_15440 | 1-phosphatidylinositol phosphodiesterase                          | PLCA     | 1.43±0.14 | 0.77±0.05 | 0.63±0.14 | 0.97±0.26 |
| C2_12986 | 1-phosphatidylinositol-4,5-bisphosphate phosphodiesterase delta-1 | PLCD1    | 0.75±0.07 | 0.83±0.10 | 1.25±0.37 | 1.12±0.21 |
| C2_3170  | 2,4-dienoyl-CoA reductase, mitochondrial                          | DECR1    | 0.97±0.17 | 1.08±0.28 | 1.71±0.60 | 1.34±0.32 |
| C2_1520  | 26S protease regulatory subunit 10B                               | PSMC6    | 0.77±0.04 | 1.13±0.14 | 1.59±0.20 | 1.11±0.21 |
| C2_1666  | 26S protease regulatory subunit 6A                                | PSMC3    | 1.27±0.13 | 1.36±0.11 | 1.95±0.40 | 1.45±0.16 |
| C2_3002  | 26S protease regulatory subunit 7                                 | PSMC2    | 1.32±0.17 | 0.71±0.07 | 0.81±0.20 | 0.96±0.14 |
| C2_514   | 26S protease regulatory subunit 8                                 | PSMC5    | 1.42±0.22 | 1.17±0.23 | 1.38±0.23 | 1.64±0.45 |
| C2_2728  | 26S proteasome non-ATPase regulatory subunit 1                    | PSMD1    | 0.84±0.11 | 1.01±0.11 | 1.21±0.15 | 1.00±0.18 |
| C2_2261  | 26S proteasome non-ATPase regulatory subunit 11                   | PSMD11   | 1.14±0.14 | 0.95±0.14 | 1.47±0.46 | 1.59±0.25 |
| C2_1392  | 26S proteasome non-ATPase regulatory subunit 12                   | PSMD12   | 0.91±0.11 | 1.03±0.24 | 1.28±0.26 | 1.37±0.26 |
| C2_790   | 26S proteasome non-ATPase regulatory subunit 13                   | PSMD13   | 0.65±0.12 | 0.82±0.18 | 0.84±0.17 | 0.82±0.16 |
| C2_4556  | 26S proteasome non-ATPase regulatory subunit 2                    | PSMD2    | 0.79±0.07 | 1.15±0.24 | 1.13±0.19 | 1.04±0.11 |
| C2_1006  | 26S proteasome non-ATPase regulatory subunit 3                    | PSMD3    | 0.81±0.09 | 0.87±0.08 | 0.99±0.15 | 0.89±0.14 |
| C2_8032  | 26S proteasome non-ATPase regulatory subunit 6                    | PSMD6    | 0.92±0.06 | 1.06±0.16 | 1.19±0.25 | 1.24±0.21 |
| C2_364   | 26S proteasome non-ATPase regulatory subunit 7                    | PSMD7    | 0.78±0.11 | 1.21±0.23 | 1.29±0.17 | 1.14±0.27 |
| C2_58026 | 26S proteasome non-ATPase regulatory subunit 8                    | PSMD8    | 0.98±0.06 | 0.93±0.13 | 0.88±0.24 | 1.03±0.09 |
| C2_6795  | 2-acylglycerol O-acyltransferase 2-A                              | MOGAT2   | 0.96±0.16 | 0.67±0.09 | 0.96±0.15 | 1.06±0.11 |
| C2_8379  | 2-amino-3-carboxymuconate-6-semialdehyde decarboxylase            | ACMSD    | 1.08±0.16 | 1.68±0.18 | 1.31±0.32 | 1.18±0.18 |
| C2_34981 | 3'(2'),5'-bisphosphate nucleotidase 1                             | BPNT1    | 1.12±0.27 | 1.82±0.17 | 1.94±0.32 | 1.46±0.34 |
| C2_7568  | 3-hydroxyacyl-CoA dehydrogenase type-2                            | HSD17B10 | 1.01±0.18 | 1.05±0.29 | 1.41±0.14 | 1.89±0.55 |
| C2_1004  | 3-hydroxyanthranilate 3,4-dioxygenase                             | HAAO     | 1.03±0.14 | 1.12±0.12 | 1.14±0.13 | 1.04±0.18 |
| C2_850   | 3-hydroxybutyrate dehydrogenase type 2                            | BDH2     | 1.75±0.18 | 1.21±0.10 | 1.05±0.15 | 1.23±0.16 |
| C2_1580  | 3-hydroxyisobutyrate dehydrogenase, mitochondrial                 | HIBADH   | 1.95±0.29 | 1.46±0.29 | 1.27±0.22 | 1.07±0.15 |
| C2_4404  | 3-hydroxyisobutyryl-CoA hydrolase, mitochondrial                  | HIBCH    | 1.37±0.19 | 1.14±0.14 | 1.38±0.37 | 1.33±0.27 |
| C2_7520  | 3-ketoacyl-CoA thiolase B, peroxisomal                            | Acaa1b   | 1.12±0.28 | 0.92±0.17 | 1.20±0.30 | 1.27±0.48 |
| C2_1174  | 3-ketoacyl-CoA thiolase, mitochondrial                            | ACAA2    | 0.70±0.14 | 1.07±0.33 | 1.26±0.55 | 0.98±0.30 |
| C2_742   | 3-oxo-5-beta-steroid 4-dehydrogenase                              | AKR1D1   | 1.15±0.04 | 1.00±0.05 | 1.07±0.14 | 1.32±0.18 |
| C2_8805  | 40S ribosomal protein S10                                         | RPS10    | 0.68±0.15 | 0.77±0.27 | 1.70±0.47 | 0.97±0.30 |
| C2_14171 | 40S ribosomal protein S13                                         | RPS13    | 0.63±0.09 | 0.75±0.11 | 1.58±0.39 | 0.97±0.34 |
| C2_414   | 40S ribosomal protein S15a                                        | RPS15A   | 0.53±0.03 | 0.93±0.18 | 1.37±0.35 | 0.82±0.16 |
| C2_7337  | 40S ribosomal protein S16                                         | RPS16    | 0.73±0.08 | 0.89±0.21 | 1.50±0.30 | 1.08±0.11 |
| C2_971   | 40S ribosomal protein S17                                         | RPS17    | 1.04±0.26 | 1.26±0.39 | 6.43±2.19 | 1.80±0.75 |
| C2_9151  | 40S ribosomal protein S18                                         | RPS18    | 0.50±0.08 | 0.96±0.32 | 1.83±0.51 | 1.05±0.29 |
| C2_955   | 40S ribosomal protein S19                                         | RPS19    | 0.58±0.05 | 1.44±0.48 | 3.17±1.08 | 1.94±0.71 |
| C2_684   | 40S ribosomal protein S2                                          | RPS2     | 0.69±0.06 | 0.93±0.16 | 1.45±0.31 | 1.09±0.32 |
| C2_232   | 40S ribosomal protein S20                                         | RPS20    | 1.32±0.34 | 1.08±0.17 | 2.58±0.79 | 1.53±0.21 |
| C2_1271  | 40S ribosomal protein S24                                         | RPS24    | 0.88±0.04 | 0.99±0.09 | 1.70±0.36 | 1.35±0.29 |
| C2_310   | 40S ribosomal protein S25                                         | RPS25    | 0.80±0.03 | 0.86±0.20 | 2.01±0.51 | 1.39±0.39 |
| C2_698   | 40S ribosomal protein S26                                         | RPS26    | 0.74±0.10 | 0.91±0.14 | 1.46±0.26 | 1.09±0.19 |
| C2_3275  | 40S ribosomal protein S28                                         | RPS28    | 0.66±0.18 | 0.59±0.19 | 1.23±0.42 | 0.85±0.15 |
| C2_23479 | 40S ribosomal protein S29                                         | RPS29    | 0.51±0.07 | 0.63±0.16 | 1.19±0.43 | 1.39±0.36 |
| C2_17873 | 40S ribosomal protein S3                                          | RPS3     | 0.63±0.04 | 0.82±0.16 | 1.34±0.26 | 0.90±0.23 |
| C2_2139  | 40S ribosomal protein S3a                                         | Rps3a1   | 0.82±0.06 | 0.67±0.11 | 1.11±0.16 | 1.15±0.23 |
| C2_593   | 40S ribosomal protein S4                                          | GM15013  | 0.61±0.05 | 0.85±0.13 | 1.71±0.35 | 1.08±0.33 |
| C2_433   | 40S ribosomal protein S5                                          | RPS5     | 0.50±0.10 | 0.95±0.34 | 1.79±0.64 | 0.87±0.17 |
| C2_164   | 40S ribosomal protein S6                                          | RPS6     | 0.64±0.12 | 0.59±0.10 | 1.12±0.22 | 1.24±0.39 |
| C2_133   | 40S ribosomal protein S7                                          | RPS7     | 0.83±0.10 | 0.85±0.10 | 1.66±0.30 | 1.37±0.43 |
| C2_4273  | 40S ribosomal protein S8                                          | RPS8     | 0.70±0.06 | 0.69±0.14 | 1.34±0.27 | 1.03±0.28 |
| C2_252   | 40S ribosomal protein S9                                          | RPS9     | 0.47±0.04 | 0.74±0.18 | 1.29±0.32 | 1.05±0.28 |
| C2_16    | 40S ribosomal protein SA                                          | RPSA     | 0.86±0.11 | 0.76±0.15 | 1.24±0.22 | 0.93±0.21 |
| C2_4721  | 4-aminobutyrate aminotransferase, mitochondrial                   | ABAT     | 1.19±0.11 | 1.20±0.12 | 1.88±0.40 | 1.38±0.37 |
| C2_2062  | 4F2 cell-surface antigen heavy chain                              | SLC3A2   | 1.02±0.06 | 1.05±0.15 | 1.75±0.40 | 0.96±0.09 |
| C2_5124  | 5'(3')-deoxyribonucleotidase, mitochondrial                       | NT5M     | 0.93±0.07 | 1.51±0.14 | 1.28±0.13 | 1.14±0.14 |
| C2_58937 | 5-oxoprolinase                                                    | OPLAH    | 0.94±0.20 | 1.17±0.02 | 1.50±0.17 | 1.07±0.18 |
| C2_4852  | 6.8 kDa mitochondrial proteolipid                                 | C14orf2  | 0.70±0.21 | 1.39±0.23 | 1.64±0.45 | 0.96±0.27 |
| C2_5222  | 60 kDa heat shock protein, mitochondrial                          | HSPD1    | 1.00±0.11 | 0.81±0.12 | 1.05±0.16 | 1.38±0.21 |
| C2_47    | 60S acidic ribosomal protein P0                                   | RPLP0    | 0.83±0.11 | 0.84±0.12 | 1.41±0.34 | 1.29±0.17 |
| C2_46323 | 60S acidic ribosomal protein P1                                   | Rplp1    | 0.71±0.16 | 1.49±0.06 | 1.66±0.28 | 1.00±0.26 |
| C2_6923  | 60S acidic ribosomal protein P2                                   | RPLP2    | 1.26±0.11 | 3.01±0.42 | 2.95±0.80 | 1.69±0.29 |
| C2_167   | 60S ribosomal protein L10                                         | RPL10    | 0.52±0.05 | 0.70±0.23 | 1.31±0.41 | 1.09±0.27 |
| C2_67    | 60S ribosomal protein L10a                                        | RPL10A   | 0.61±0.17 | 1.12±0.45 | 1.36±0.49 | 1.37±0.33 |
| C2_236   | 60S ribosomal protein L11                                         | RPL11    | 0.71±0.23 | 1.12±0.45 | 1.17±0.38 | 1.65±0.56 |
| C2_453   | 60S ribosomal protein L13                                         | RPL13    | 0.74±0.17 | 0.83±0.23 | 1.50±0.32 | 1.42±0.21 |
| C2_441   | 60S ribosomal protein L13a                                        | RPL13A   | 0.62±0.19 | 1.26±0.55 | 1.25±0.45 | 1.41±0.34 |
| C2_142   | 60S ribosomal protein L14                                         | RPL14    | 1.09±0.14 | 1.08±0.27 | 1.62±0.47 | 1.70±0.18 |
| C2_279   | 60S ribosomal protein L15                                         | RPL15    | 0.58±0.22 | 1.60±0.89 | 1.71±0.73 | 1.45±0.42 |
| C2_1244  | 60S ribosomal protein L17                                         | RPL17    | 0.63±0.16 | 1.35±0.67 | 1.39±0.42 | 1.50±0.32 |

|             |                                                               |          |             |             |             |             |
|-------------|---------------------------------------------------------------|----------|-------------|-------------|-------------|-------------|
| C2_842      | 60S ribosomal protein L18                                     | RPL18    | 0.77±0.16   | 1.18±0.41   | 1.28±0.53   | 1.38±0.41   |
| C2_12358    | 60S ribosomal protein L18a                                    | RPL18A   | 0.61±0.27   | 1.40±0.75   | 1.71±0.76   | 1.57±0.53   |
| C2_700      | 60S ribosomal protein L19                                     | RPL19    | 0.50±0.14   | 1.14±0.49   | 1.36±0.37   | 1.36±0.30   |
| C2_94336    | 60S ribosomal protein L21                                     | RPL21    | 0.89±0.12   | 1.13±0.39   | 1.76±0.55   | 1.79±0.30   |
| C2_39656    | 60S ribosomal protein L22                                     | RPL22    | 0.72±0.12   | 0.86±0.06   | 1.22±0.30   | 1.14±0.30   |
| C2_373      | 60S ribosomal protein L23                                     | RPL23    | 0.88±0.12   | 1.28±0.50   | 2.07±0.56   | 1.89±0.32   |
| C2_1007     | 60S ribosomal protein L23a                                    | Rpl23a   | 0.79±0.10   | 1.05±0.23   | 2.51±0.82   | 1.72±0.31   |
| C2_119969   | 60S ribosomal protein L24                                     | RPL24    | 0.41±0.12   | 1.51±1.16   | 1.85±0.72   | 1.41±0.32   |
| C2_392      | 60S ribosomal protein L26                                     | RPL26    | 0.60±0.15   | 1.17±0.52   | 1.40±0.47   | 1.38±0.43   |
| C2_121623   | 60S ribosomal protein L27                                     | RPL27    | 0.69±0.09   | 0.82±0.29   | 1.64±0.47   | 1.09±0.22   |
| C2_343      | 60S ribosomal protein L27a                                    | RPL27A   | 0.90±0.13   | 1.04±0.22   | 2.23±0.54   | 1.87±0.30   |
| C2_12       | 60S ribosomal protein L3                                      | RPL3     | 0.67±0.10   | 0.97±0.36   | 1.13±0.35   | 1.21±0.36   |
| C2_17126    | 60S ribosomal protein L30                                     | RPL30    | 0.94±0.09   | 1.21±0.27   | 1.89±0.47   | 1.04±0.11   |
| C2_111961   | 60S ribosomal protein L31                                     | RPL31    | 0.93±0.31   | 0.69±0.17   | 1.06±0.26   | 1.75±0.29   |
| C2_361      | 60S ribosomal protein L32                                     | Rpl32    | 0.78±0.15   | 1.25±0.52   | 1.38±0.40   | 1.60±0.44   |
| C2_72598    | 60S ribosomal protein L34                                     | Rpl34    | 0.44±0.08   | 1.39±0.54   | 3.26±1.37   | 1.27±0.45   |
| C2_89835    | 60S ribosomal protein L35                                     | RPL35    | 0.77±0.08   | 1.01±0.24   | 1.74±0.44   | 1.51±0.25   |
| C2_3033     | 60S ribosomal protein L35a                                    | RPL35A   | 0.98±0.18   | 1.45±0.45   | 2.30±0.58   | 2.40±0.40   |
| C2_9484     | 60S ribosomal protein L38                                     | RPL38    | 0.81±0.07   | 0.91±0.38   | 2.70±1.00   | 1.43±0.50   |
| C2_25       | 60S ribosomal protein L4                                      | RPL4     | 0.63±0.19   | 1.16±0.51   | 1.60±0.57   | 1.77±0.48   |
| C2_143      | 60S ribosomal protein L5                                      | RPL5     | 0.64±0.19   | 0.93±0.27   | 0.93±0.23   | 1.35±0.39   |
| C2_827      | 60S ribosomal protein L6                                      | RPL6     | 0.56±0.17   | 1.19±0.53   | 1.42±0.45   | 1.69±0.56   |
| C2_434      | 60S ribosomal protein L7                                      | RPL7     | 0.70±0.20   | 1.45±0.69   | 1.83±0.81   | 1.76±0.55   |
| C2_98       | 60S ribosomal protein L7a                                     | RPL7A    | 0.92±0.09   | 1.02±0.24   | 1.48±0.38   | 1.06±0.10   |
| C2_174      | 60S ribosomal protein L8                                      | RPL8     | 0.80±0.14   | 1.20±0.33   | 1.98±0.55   | 1.93±0.35   |
| C2_156      | 60S ribosomal protein L9                                      | RPL9     | 0.68±0.13   | 1.08±0.37   | 1.44±0.55   | 1.81±0.57   |
| C2_11947    | 6-phosphofructo-2-kinase/fructose-2,6-biphosphatase 4         | PFKFB4   | 17.22±16.56 | 32.12±19.84 | 27.88±17.61 | 17.32±16.54 |
| C2_3317     | 6-phosphofructokinase type C                                  | PFKP     | 0.74±0.13   | 1.14±0.07   | 1.03±0.10   | 0.80±0.14   |
| C2_4969     | 6-phosphofructokinase, liver type                             | PFKL     | 1.08±0.12   | 0.81±0.05   | 1.17±0.23   | 1.26±0.28   |
| C2_531      | 6-phosphogluconate dehydrogenase, decarboxylating             | PGD      | 0.88±0.07   | 1.32±0.18   | 1.14±0.18   | 1.25±0.14   |
| C2_6550     | 6-phosphogluconolactonase                                     | PGLS     | 2.45±0.57   | 1.53±0.26   | 1.42±0.16   | 1.41±0.19   |
| C2_14692    | 6-pyruvoyl tetrahydrobiopterin synthase                       | PTS      | 1.63±0.21   | 1.12±0.15   | 0.87±0.07   | 1.29±0.22   |
| C2_25027    | 78 kDa glucose-regulated protein                              | HSPA5    | 0.85±0.08   | 1.23±0.14   | 2.71±0.93   | 1.24±0.23   |
| C2_14888    | 78 kDa glucose-regulated protein                              | HSPA5    | 1.05±0.07   | 1.22±0.19   | 1.73±0.36   | 1.28±0.11   |
| C2_42       | 90kDa heat shock protein beta                                 | HSP90AB1 | 0.65±0.05   | 0.91±0.14   | 1.09±0.37   | 1.10±0.24   |
| C2_40874    | Abhydrolase domain-containing protein 14B                     | ABHD14B  | 0.86±0.17   | 1.00±0.24   | 1.18±0.26   | 1.20±0.28   |
| C2_7286     | Abhydrolase domain-containing protein 14B                     | ABHD14B  | 0.90±0.34   | 0.84±0.24   | 0.87±0.28   | 0.99±0.22   |
| C2_13751    | Acetolactate synthase-like protein                            | ILVBL    | 0.93±0.14   | 0.90±0.09   | 1.65±0.22   | 1.63±0.54   |
| C2_98839    | Acetolactate synthase-like protein                            | ILVBL    | 1.25±0.23   | 1.00±0.18   | 1.59±0.34   | 1.44±0.19   |
| C2_10641    | Acetyl-coenzyme A synthetase, cytoplasmic                     | ACSS2    | 0.90±0.26   | 0.73±0.20   | 0.86±0.31   | 1.21±0.38   |
| C2_2879     | Acid ceramidase                                               | ASAH1    | 1.25±0.12   | 1.27±0.16   | 0.98±0.19   | 1.30±0.37   |
| C2_3009     | Acid sphingomyelinase-like phosphodiesterase 3b               | SMPDL3B  | 2.10±0.51   | 1.20±0.24   | 1.00±0.20   | 1.02±0.23   |
| C2_18917    | Acidic leucine-rich nuclear phosphoprotein 32 family member E | Anp32e   | 0.93±0.16   | 1.48±0.16   | 1.01±0.22   | 0.77±0.15   |
| C3_irc63576 | Acidic mammalian chitinase                                    | CHIA     | 3.64±1.16   | 1.53±0.60   | 1.21±0.89   | 0.92±0.30   |
| C2_18809    | Aconitate hydratase, mitochondrial                            | ACO2     | 1.11±0.14   | 1.21±0.09   | 2.23±0.68   | 1.52±0.31   |
| C2_210      | Actin, cytoplasmic 1                                          | ACTB     | 0.96±0.12   | 1.25±0.18   | 2.17±0.65   | 1.79±0.68   |
| C2_102126   | Actin, cytoplasmic 2                                          | ACTG1    | 1.36±0.10   | 1.96±0.36   | 4.05±1.94   | 4.98±2.72   |
| C2_8398     | Actin-related protein 10                                      | ACTR10   | 0.73±0.12   | 1.42±0.44   | 1.37±0.32   | 1.26±0.50   |
| C2_4166     | Actin-related protein 2/3 complex subunit 3                   | ARPC3    | 0.66±0.07   | 1.90±0.74   | 1.58±0.58   | 1.74±0.59   |
| C2_427      | Actin-related protein 2/3 complex subunit 4                   | ARPC4    | 0.80±0.05   | 1.07±0.16   | 1.16±0.16   | 1.07±0.30   |
| C2_503      | Actin-related protein 2/3 complex subunit 5                   | ARPC5    | 0.82±0.09   | 1.79±0.46   | 1.57±0.34   | 1.51±0.19   |
| C2_3453     | Actin-related protein 2-A                                     | ACTR2    | 0.93±0.14   | 1.29±0.22   | 1.19±0.03   | 1.18±0.28   |
| C2_1771     | Actin-related protein 3                                       | ACTR3    | 0.76±0.13   | 1.03±0.30   | 1.05±0.29   | 1.00±0.23   |
| C2_2259     | Activated RNA polymerase II transcriptional coactivator p15   | SUB1     | 2.14±0.31   | 1.22±0.20   | 0.96±0.19   | 1.83±0.52   |
| C2_20973    | Active breakpoint cluster region-related protein              | ABR      | 1.83±0.88   | 1.29±0.29   | 1.35±0.15   | 1.22±0.26   |
| C2_11239    | Acyl carrier protein, mitochondrial                           | NDUFAB1  | 1.03±0.07   | 1.27±0.16   | 1.47±0.33   | 0.84±0.12   |
| C2_2532     | Acylamino-acid-releasing enzyme                               | APEH     | 1.70±0.20   | 1.01±0.15   | 0.86±0.15   | 1.37±0.34   |
| C2_47266    | Acyl-CoA dehydrogenase family member 11                       | ACAD11   | 1.46±0.16   | 0.88±0.20   | 0.98±0.15   | 1.43±0.52   |
| C2_3692     | Acyl-CoA dehydrogenase family member 9, mitochondrial         | ACAD9    | 1.57±0.22   | 1.05±0.23   | 1.06±0.20   | 1.17±0.28   |
| C2_8427     | Acyl-CoA synthetase family member 2, mitochondrial            | ACSF2    | 1.46±0.17   | 1.09±0.11   | 1.34±0.38   | 0.98±0.11   |
| C2_649      | Acyl-CoA-binding protein                                      | DBI      | 0.60±0.12   | 0.66±0.25   | 1.14±0.54   | 0.97±0.40   |
| C2_1332     | Acyl-CoA-binding protein homolog                              | DBI      | 0.49±0.06   | 1.01±0.35   | 1.07±0.34   | 0.89±0.30   |
| C2_9418     | Acyl-coenzyme A thioesterase 3                                | ACOT1    | 0.88±0.12   | 1.22±0.26   | 1.04±0.21   | 0.89±0.09   |
| C2_4253     | Acyl-protein thioesterase 2                                   | LYPLA2   | 0.59±0.17   | 0.86±0.17   | 0.90±0.29   | 1.10±0.15   |
| C2_11692    | Adenine phosphoribosyltransferase                             | APRT     | 1.03±0.18   | 1.32±0.17   | 1.62±0.46   | 2.07±0.55   |
| C2_7078     | Adenosine deaminase                                           | ADA      | 1.54±0.16   | 0.97±0.09   | 0.85±0.09   | 1.26±0.23   |
| C2_5126     | Adenosine kinase                                              | ADK      | 1.37±0.14   | 1.30±0.07   | 1.10±0.09   | 1.15±0.06   |
| C2_39087    | Adenosine kinase 1                                            | ADK1     | 1.71±0.27   | 1.28±0.19   | 1.11±0.07   | 1.02±0.10   |
| C2_2187     | Adenylylhomocysteine A                                        | AHCY     | 2.63±0.60   | 1.49±0.20   | 1.34±0.28   | 1.87±0.52   |
| C2_6546     | Adenylosuccinate lyase                                        | ADSL     | 1.26±0.20   | 1.27±0.11   | 1.08±0.05   | 0.97±0.10   |
| C2_41283    | Adenylyl cyclase-associated protein 1                         | CAP1     | 1.13±0.20   | 2.46±0.17   | 2.42±0.50   | 1.59±0.44   |
| C2_75777    | Adenylyl cyclase-associated protein 1                         | CAP1     | 1.73±0.28   | 1.61±0.24   | 1.53±0.31   | 1.32±0.14   |
| C2_2038     | ADP-ribosylation factor 4                                     | ARF4     | 0.58±0.15   | 0.66±0.15   | 1.40±0.60   | 1.42±0.55   |
| C2_12596    | ADP-ribosylation factor GTPase-activating protein 2           | ARFGAP2  | 1.99±0.30   | 1.66±0.34   | 1.48±0.54   | 1.02±0.32   |
| C2_1966     | ADP-ribosylation factor-like protein 1                        | ARL1     | 0.91±0.11   | 0.87±0.19   | 1.25±0.27   | 1.29±0.22   |
| C2_3920     | ADP-sugar pyrophosphatase                                     | NUDT5    | 4.00±2.25   | 3.71±1.54   | 1.63±0.65   | 2.00±0.43   |
| C2_970      | Aflatoxin B1 aldehyde reductase member 2                      | AKR7A2   | 0.97±0.11   | 1.21±0.16   | 1.21±0.07   | 1.16±0.13   |
| C2_4151     | Agmatinase, mitochondrial                                     | AGMAT    | 2.47±0.62   | 1.05±0.20   | 1.30±0.39   | 1.28±0.53   |

|                  |                                                                       |          |           |           |           |           |
|------------------|-----------------------------------------------------------------------|----------|-----------|-----------|-----------|-----------|
| C2_9243          | Alanine--glyoxylate aminotransferase 2-like 2                         | AGXT2    | 1.04±0.14 | 0.78±0.08 | 0.71±0.06 | 1.10±0.28 |
| C2_4628          | Alanyl-tRNA synthetase, cytoplasmic                                   | AARS     | 1.56±0.22 | 1.30±0.13 | 1.20±0.13 | 1.35±0.12 |
| C2_8373          | Alanyl-tRNA synthetase, cytoplasmic                                   | AARS     | 1.07±0.20 | 1.43±0.19 | 1.27±0.22 | 1.03±0.27 |
| C2_996           | Alcohol dehydrogenase [NADP+] B                                       | AKR1A1   | 1.09±0.15 | 1.39±0.11 | 1.20±0.17 | 0.99±0.18 |
| C2_189           | Alcohol dehydrogenase 1                                               | ADH1C    | 2.62±0.74 | 1.46±0.21 | 1.12±0.22 | 1.91±0.44 |
| C2_288           | Alcohol dehydrogenase class-3                                         | ADH3     | 2.06±0.44 | 1.09±0.17 | 0.85±0.13 | 1.55±0.41 |
| C2_43704         | Alcohol dehydrogenase class-3 chain H                                 | ADH3     | 2.62±0.50 | 1.71±0.40 | 1.67±0.38 | 2.88±0.82 |
| C2_33526         | Alcohol dehydrogenase class-3 chain L                                 | ADH3     | 1.83±0.19 | 0.79±0.17 | 0.81±0.25 | 1.90±0.63 |
| C2_2085          | Aldehyde dehydrogenase family 1 member L1                             | ALDH1L1  | 1.02±0.29 | 1.53±0.17 | 1.17±0.15 | 1.14±0.22 |
| C2_53791         | Aldehyde dehydrogenase family 8 member A1                             | ALDH8A1  | 1.50±0.16 | 0.97±0.12 | 0.66±0.05 | 1.22±0.51 |
| C2_77670         | Aldehyde dehydrogenase family 8 member A1                             | ALDH8A1  | 1.59±0.47 | 1.79±0.41 | 1.22±0.35 | 2.05±0.53 |
| C2_3814          | Aldehyde dehydrogenase family 9 member A1                             | ALDH9A1  | 0.72±0.06 | 1.15±0.16 | 1.49±0.19 | 0.84±0.16 |
| C2_399           | Aldehyde dehydrogenase, mitochondrial                                 | ALDH2    | 0.98±0.11 | 1.22±0.13 | 1.64±0.55 | 1.51±0.31 |
| C2_11977         | Aldehyde oxidase                                                      | AOX1     | 1.73±0.21 | 1.24±0.24 | 1.03±0.10 | 1.37±0.25 |
| C2_83262         | Aldehyde oxidase                                                      | AOX1     | 1.75±0.29 | 1.68±0.38 | 2.46±0.50 | 1.55±0.44 |
| C2_97934         | Aldehyde oxidase                                                      | AOX1     | 1.67±0.17 | 1.33±0.19 | 1.15±0.23 | 1.56±0.35 |
| C2_3792          | Aldose 1-epimerase                                                    | GALM     | 1.74±0.25 | 1.06±0.14 | 0.86±0.14 | 1.21±0.15 |
| C2_1189          | Aldose reductase                                                      | AKR1B1   | 1.21±0.12 | 1.55±0.25 | 1.72±0.19 | 2.35±0.80 |
| C2_27912         | Allograft inflammatory factor 1-like                                  | AIF1L    | 0.68±0.22 | 1.32±0.48 | 0.60±0.19 | 1.08±0.18 |
| C2_14294         | Alpha-1-antitrypsin homolog                                           | SERPINA1 | 1.66±0.40 | 1.28±0.23 | 0.96±0.28 | 1.30±0.36 |
| C2_6331          | Alpha-1-macroglobulin                                                 | A1M      | 1.27±0.24 | 1.39±0.24 | 0.96±0.31 | 1.12±0.36 |
| C2_9982          | Alpha-2-antiplasmin                                                   | SERPINF2 | 1.24±0.13 | 1.40±0.20 | 1.03±0.29 | 1.31±0.39 |
| C2_22548         | Alpha-2-HS-glycoprotein                                               | AHSG     | 1.49±0.21 | 2.63±1.04 | 2.03±0.62 | 1.55±0.33 |
| s_flp0005a11_f_1 | Alpha-2-macroglobulin                                                 | A2M      | 1.33±0.28 | 1.09±0.14 | 0.85±0.25 | 1.20±0.37 |
| C2_23524         | Alpha-2-macroglobulin-like protein 1                                  | A2ML1    | 1.26±0.29 | 0.82±0.16 | 0.83±0.07 | 0.80±0.17 |
| C2_1801          | Alpha-actinin-3                                                       | Actn3    | 1.08±0.20 | 2.83±0.88 | 2.43±0.87 | 1.32±0.17 |
| C2_26557         | Alpha-actinin-4                                                       | ACTN4    | 0.96±0.07 | 1.62±0.23 | 1.44±0.22 | 1.22±0.28 |
| C2_1946          | Alpha-aminoadipic semialdehyde dehydrogenase                          | ALDH7A1  | 1.94±0.28 | 1.30±0.20 | 1.15±0.19 | 1.68±0.37 |
| C2_16242         | Alpha-aspartyl dipeptidase                                            | AAD-A    | 1.13±0.11 | 1.06±0.15 | 1.52±0.37 | 1.64±0.31 |
| C2_440           | Alpha-enolase                                                         | ENO1     | 0.97±0.12 | 1.59±0.18 | 1.25±0.14 | 1.09±0.19 |
| C2_23595         | Alpha-glucosidase 2                                                   | GAA      | 1.70±0.46 | 1.08±0.14 | 0.91±0.19 | 0.95±0.21 |
| C2_17154         | Alpha-mannosidase 2C1                                                 | MAN2C1   | 1.26±0.15 | 0.83±0.07 | 0.72±0.16 | 1.05±0.25 |
| C2_52709         | Alpha-methylacyl-CoA racemase                                         | AMACR    | 1.70±0.22 | 0.96±0.16 | 0.96±0.24 | 0.90±0.21 |
| C2_7302          | Alpha-N-acetylglucosaminidase                                         | NAGLU    | 1.62±0.30 | 0.92±0.21 | 0.96±0.33 | 1.27±0.42 |
| C2_2739          | Amiloride-sensitive amine oxidase [copper-containing]                 | AOC1     | 1.37±0.08 | 1.34±0.09 | 1.21±0.12 | 1.16±0.06 |
| C2_7596          | Amine oxidase [flavin-containing]                                     | MAOB     | 0.70±0.06 | 0.90±0.18 | 1.53±0.39 | 0.81±0.16 |
| C2_23714         | Amine oxidase [flavin-containing] A                                   | MAOA     | 1.68±0.28 | 1.15±0.29 | 1.15±0.27 | 1.46±0.35 |
| C2_616           | Aminoacyl tRNA synthase complex-interacting multifunctional protein 1 | AIMP1    | 1.04±0.18 | 1.15±0.16 | 0.98±0.15 | 0.94±0.14 |
| C2_1372          | Aminoacylase-1                                                        | ACY1     | 1.71±0.19 | 1.15±0.16 | 0.97±0.14 | 1.41±0.32 |
| C2_73930         | Aminoglycoside phosphotransferase domain-containing protein 1         | HYKK     | 1.47±0.20 | 5.42±2.27 | 2.29±1.02 | 2.39±0.77 |
| C3_c17712        | Aminomethyltransferase, mitochondrial                                 | AMT      | 1.11±0.12 | 1.15±0.09 | 1.28±0.07 | 1.21±0.31 |
| C2_7522          | Aminopeptidase N                                                      | AMPEP    | 1.87±0.28 | 1.30±0.29 | 0.85±0.17 | 1.17±0.41 |
| C2_16955         | AMP deaminase 2                                                       | AMPD2    | 0.71±0.09 | 1.18±0.34 | 0.85±0.08 | 0.92±0.11 |
| C2_94051         | Angiotensin-converting enzyme                                         | ACE      | 2.43±0.37 | 1.26±0.22 | 0.91±0.26 | 1.24±0.34 |
| C2_31056         | Angiotensin-converting enzyme                                         | ACE      | 2.66±0.55 | 1.34±0.32 | 1.08±0.37 | 1.11±0.38 |
| C2_49201         | Angiotensin-converting enzyme                                         | ACE      | 2.32±0.37 | 1.04±0.28 | 0.71±0.23 | 0.92±0.35 |
| C2_2687          | Angiotensin-converting enzyme                                         | ACE      | 1.96±0.30 | 1.24±0.30 | 0.86±0.26 | 1.08±0.35 |
| C2_1538          | Angiotensin-converting enzyme 2                                       | ACE2     | 2.22±0.41 | 0.83±0.09 | 0.81±0.26 | 1.03±0.24 |
| C2_89317         | Angiotensin-converting enzyme 2                                       | ACE2     | 2.08±0.41 | 0.71±0.10 | 0.73±0.31 | 0.90±0.24 |
| C2_1919          | Anionic trypsin-2                                                     | PRSS2    | 2.74±0.46 | 0.84±0.12 | 0.86±0.30 | 1.59±0.50 |
| C2_98249         | Ankyrin repeat and FYVE domain-containing protein 1                   | ANKFY1   | 1.33±0.30 | 0.97±0.21 | 0.99±0.21 | 1.27±0.19 |
| C3_c47959        | Ankyrin-3                                                             | ANK3     | 0.84±0.16 | 1.33±0.30 | 0.81±0.19 | 0.95±0.08 |
| C2_2096          | Annexin A11                                                           | ANXA11   | 0.93±0.21 | 1.18±0.21 | 1.03±0.22 | 1.00±0.17 |
| C2_3972          | Annexin A13                                                           | ANXA13   | 0.82±0.13 | 0.91±0.12 | 1.33±0.42 | 1.00±0.17 |
| C2_2251          | Annexin A2                                                            | ANXA2    | 0.96±0.06 | 2.92±0.97 | 1.34±0.76 | 1.03±0.13 |
| C2_5883          | Annexin A2-A                                                          | ANXA2-A  | 0.71±0.14 | 1.79±0.90 | 1.86±0.37 | 1.24±0.22 |
| C2_930           | Annexin A3                                                            | ANXA3    | 1.22±0.17 | 1.02±0.18 | 1.51±0.18 | 1.10±0.19 |
| C2_88            | Annexin A4                                                            | ANXA4    | 1.34±0.25 | 1.06±0.24 | 1.29±0.31 | 1.14±0.34 |
| C2_772           | Annexin A5                                                            | ANXA5    | 0.83±0.14 | 1.24±0.21 | 1.24±0.30 | 0.86±0.13 |
| C2_4218          | Anterior gradient protein 2 homolog                                   | AGR2     | 1.42±0.16 | 1.05±0.11 | 1.32±0.30 | 1.62±0.21 |
| C3_c16373        | Antithrombin-III                                                      | SERPINC1 | 1.27±0.14 | 1.44±0.25 | 1.20±0.21 | 1.29±0.27 |
| C2_37278         | AP-1 complex subunit beta-1                                           | AP1B1    | 0.96±0.14 | 1.27±0.11 | 1.38±0.13 | 1.35±0.21 |
| C2_28545         | AP-1 complex subunit beta-1                                           | AP1B1    | 1.10±0.05 | 1.25±0.14 | 0.99±0.12 | 1.13±0.13 |
| C2_11830         | AP-1 complex subunit beta-1                                           | AP1B1    | 0.79±0.08 | 0.88±0.20 | 1.00±0.28 | 1.08±0.16 |
| C2_8787          | AP-1 complex subunit gamma-1                                          | AP1G1    | 0.78±0.14 | 1.36±0.23 | 1.38±0.19 | 0.92±0.12 |
| C2_2248          | AP-1 complex subunit mu-2                                             | AP1M2    | 0.93±0.14 | 1.01±0.07 | 0.94±0.13 | 0.90±0.12 |
| C2_13693         | AP-2 complex subunit alpha-1                                          | AP2A1    | 0.91±0.14 | 1.13±0.08 | 0.80±0.09 | 0.86±0.14 |
| C2_5784          | AP-2 complex subunit beta                                             | Ap2b1    | 1.42±0.11 | 1.22±0.18 | 0.92±0.13 | 1.19±0.18 |
| C2_79275         | AP-3 complex subunit delta-1                                          | AP3D1    | 0.92±0.16 | 0.72±0.17 | 0.85±0.23 | 0.91±0.24 |
| C2_6208          | Apical endosomal glycoprotein                                         | MAMDC4   | 1.28±0.12 | 0.70±0.09 | 0.65±0.11 | 0.86±0.19 |
| C2_120884        | Apolipoprotein A-I                                                    | APOA1    | 0.74±0.07 | 3.18±1.30 | 1.88±0.63 | 1.47±0.38 |
| C2_4177          | Apolipoprotein A-I-binding protein                                    | APOA1BP  | 1.09±0.18 | 1.33±0.16 | 0.90±0.13 | 0.89±0.16 |
| C2_23243         | Apolipoprotein A-IV                                                   | APOA4    | 0.55±0.08 | 0.38±0.07 | 1.42±0.69 | 1.32±0.56 |
| C3_irc60236      | Apolipoprotein A-IV-like isoform X1                                   | APOA4    | 0.61±0.15 | 0.47±0.08 | 1.26±0.64 | 0.78±0.24 |
| C3_c28587        | Apolipoprotein B-100                                                  | APOB     | 2.05±0.51 | 1.83±0.32 | 0.92±0.13 | 1.15±0.14 |
| C2_15164         | Apolipoprotein B-100                                                  | APOB     | 1.08±0.16 | 0.90±0.07 | 1.56±0.32 | 1.34±0.21 |
| C2_5614          | Apolipoprotein B-100                                                  | APOB     | 0.85±0.03 | 0.85±0.12 | 1.26±0.22 | 1.07±0.16 |

|           |                                                                             |          |           |           |           |           |
|-----------|-----------------------------------------------------------------------------|----------|-----------|-----------|-----------|-----------|
| C2_28992  | Apolipoprotein B-100                                                        | APOB     | 1.73±0.41 | 1.19±0.25 | 1.58±0.36 | 1.72±0.47 |
| C3_c2363  | Apolipoprotein B-100-like                                                   | APOB-L   | 1.29±0.15 | 1.39±0.26 | 0.56±0.10 | 0.65±0.11 |
| C2_5591   | Apolipoprotein Eb                                                           | APOEB    | 0.68±0.03 | 0.53±0.04 | 1.38±0.60 | 1.40±0.49 |
| C2_9385   | Apoptosis inhibitor 5                                                       | API5     | 0.80±0.18 | 0.99±0.09 | 1.06±0.12 | 0.76±0.08 |
| C2_322    | Apoptosis-associated speck-like protein containing a CARD                   | PYCARD   | 0.75±0.19 | 1.60±0.55 | 0.83±0.26 | 1.23±0.40 |
| C2_1626   | Apoptosis-associated speck-like protein containing a CARD                   | PYCARD   | 0.79±0.14 | 1.07±0.26 | 1.15±0.31 | 0.88±0.24 |
| C2_6260   | Apoptosis-inducing factor 1, mitochondrial                                  | AIFM1    | 1.23±0.18 | 1.18±0.26 | 1.11±0.11 | 1.15±0.25 |
| C2_6887   | Apoptosis-inducing factor 3                                                 | AIFM3    | 0.76±0.34 | 2.45±0.64 | 1.78±0.22 | 1.12±0.26 |
| C2_489    | Arachidonate 12-lipoxygenase, 12R-type                                      | ALOX12B  | 1.52±0.36 | 1.04±0.14 | 1.05±0.15 | 0.93±0.15 |
| C2_857    | Arsenite methyltransferase                                                  | AS3MT    | 0.61±0.07 | 1.04±0.29 | 1.41±0.36 | 1.07±0.30 |
| C2_3390   | Asparaginyl-tRNA synthetase, cytoplasmic                                    | NARS     | 1.35±0.40 | 0.82±0.13 | 1.19±0.16 | 1.14±0.21 |
| C2_14096  | Aspartate aminotransferase, cytoplasmic                                     | GOT1     | 1.30±0.12 | 0.95±0.11 | 0.81±0.21 | 0.97±0.11 |
| C2_645    | Aspartate aminotransferase, mitochondrial                                   | GOT2     | 2.00±0.33 | 1.02±0.14 | 0.98±0.22 | 1.38±0.34 |
| C2_4570   | Aspartoacylase                                                              | ASPA     | 1.65±0.12 | 1.01±0.17 | 0.88±0.21 | 1.11±0.21 |
| C2_1059   | Aspartoacylase-2B                                                           | ACY3     | 1.54±0.23 | 1.00±0.07 | 0.99±0.16 | 1.24±0.18 |
| C2_15853  | Aspartyl aminopeptidase                                                     | DNPEP    | 2.21±0.39 | 0.95±0.22 | 0.63±0.15 | 1.71±0.55 |
| C2_2153   | Aspartyl-tRNA synthetase, cytoplasmic                                       | ARSA     | 1.03±0.06 | 0.85±0.05 | 1.00±0.16 | 1.16±0.14 |
| C2_176    | ATP synthase subunit b, mitochondrial                                       | ATP5A1   | 1.00±0.31 | 0.89±0.21 | 1.35±0.39 | 0.94±0.31 |
| C2_2323   | ATP-binding cassette sub-family E member 1                                  | ABCE1    | 1.16±0.11 | 1.03±0.06 | 1.41±0.32 | 1.08±0.11 |
| C2_1676   | ATP-binding cassette sub-family F member 1                                  | ABCF1    | 1.35±0.30 | 1.11±0.25 | 1.71±0.22 | 1.39±0.24 |
| C3_c19506 | ATP-citrate synthase                                                        | ACLY     | 0.97±0.10 | 0.97±0.05 | 1.00±0.17 | 1.34±0.22 |
| C2_8958   | ATP-citrate synthase                                                        | ACLY     | 0.72±0.05 | 0.90±0.08 | 1.41±0.47 | 1.29±0.40 |
| C2_1283   | ATP-dependent RNA helicase DDX39A                                           | DDX39A   | 0.54±0.09 | 1.24±0.35 | 1.35±0.36 | 1.25±0.29 |
| C2_214    | Bactericidal permeability-increasing protein                                | BPI      | 1.16±0.13 | 1.32±0.22 | 1.07±0.24 | 1.11±0.24 |
| C2_1409   | Barrier-to-autointegration factor                                           | BANF1    | 1.59±0.28 | 2.29±0.52 | 3.03±0.50 | 1.65±0.66 |
| C2_10232  | Barrier-to-autointegration factor-like protein                              | BANF2    | 2.58±1.23 | 2.94±0.60 | 3.89±1.28 | 1.51±0.62 |
| C2_8263   | Beta,beta-carotene 15,15'-monooxygenase                                     | BCO1     | 0.95±0.19 | 1.03±0.24 | 1.20±0.19 | 1.30±0.36 |
| C2_28     | Beta-2-microglobulin                                                        | B2M      | 1.44±0.28 | 1.26±0.21 | 1.73±0.26 | 1.46±0.29 |
| C2_19834  | Beta-actin-like protein 2                                                   | ACTBL2   | 0.96±0.06 | 0.93±0.27 | 1.90±0.72 | 1.55±0.57 |
| C2_69899  | Beta-centractin                                                             | ACTR1B   | 0.89±0.15 | 0.74±0.07 | 1.29±0.43 | 1.01±0.21 |
| C2_370    | Beta-enolase                                                                | ENO3     | 1.45±0.33 | 1.69±0.25 | 1.21±0.15 | 1.02±0.20 |
| C2_26906  | Beta-galactosidase-1-like protein 2                                         | GLB1L2   | 1.08±0.19 | 1.22±0.20 | 1.08±0.27 | 1.38±0.43 |
| C2_8457   | Beta-glucuronidase                                                          | GUSB     | 1.56±0.17 | 1.13±0.24 | 1.00±0.17 | 1.44±0.61 |
| C2_3871   | Beta-hexosaminidase subunit beta                                            | HEXB     | 1.84±0.38 | 1.10±0.16 | 0.86±0.19 | 1.71±0.70 |
| C2_79951  | Betaine--homocysteine S-methyltransferase 2                                 | BHMT     | 1.30±0.44 | 1.30±0.21 | 0.92±0.20 | 0.99±0.30 |
| C2_5459   | Beta-ureidopropionase                                                       | UPB1     | 1.74±0.09 | 1.01±0.18 | 0.88±0.22 | 1.32±0.31 |
| C2_3176   | Bifunctional 3'-phosphoadenosine 5'-phosphosulfate synthase 2               | PAPSS2   | 1.03±0.12 | 0.77±0.03 | 1.52±0.41 | 1.40±0.25 |
| C2_4884   | Bifunctional aminoacyl-tRNA synthetase                                      | EPRS     | 0.97±0.17 | 0.75±0.11 | 0.77±0.19 | 1.20±0.22 |
| C2_48204  | Bifunctional aminoacyl-tRNA synthetase                                      | EPRS     | 0.55±0.22 | 1.10±0.29 | 1.29±0.45 | 1.02±0.18 |
| C2_6394   | Bifunctional polynucleotide phosphatase/kinase                              | PNKP     | 1.20±0.24 | 1.28±0.15 | 1.21±0.22 | 1.29±0.33 |
| C2_4731   | Bifunctional protein NCOAT                                                  | MGEA5    | 0.77±0.07 | 0.89±0.20 | 1.25±0.47 | 1.26±0.37 |
| C2_4254   | Bifunctional purine biosynthesis protein PURH                               | ATIC     | 1.17±0.09 | 1.13±0.12 | 0.90±0.08 | 1.08±0.13 |
| C2_73027  | Bile salt-activated lipase                                                  | CEL      | 1.34±0.19 | 0.65±0.10 | 0.69±0.07 | 0.68±0.12 |
| C2_29998  | Biotinidase                                                                 | BTD      | 1.51±0.16 | 1.46±0.21 | 1.17±0.12 | 1.33±0.24 |
| C2_885    | Bleomycin hydrolase                                                         | BLMH     | 2.04±0.29 | 1.06±0.18 | 0.95±0.16 | 1.44±0.33 |
| C2_112893 | BOLA class I histocompatibility antigen, alpha chain BL3-7                  | HA1B     | 1.28±0.21 | 1.38±0.16 | 2.00±0.71 | 1.35±0.47 |
| C2_15564  | Brain-specific angiogenesis inhibitor 1-associated protein 2-like protein 2 | BAIAP2L2 | 0.86±0.16 | 0.87±0.12 | 0.82±0.15 | 1.02±0.25 |
| C2_27587  | Butyrophilin-like protein 2                                                 | BTNL2    | 1.25±0.07 | 0.91±0.19 | 1.24±0.29 | 1.17±0.21 |
| C2_5533   | CAAX prenyl protease 1 homolog                                              | ZMPSTE24 | 1.54±0.27 | 1.09±0.24 | 1.00±0.30 | 1.48±0.47 |
| C2_48101  | Cadherin EGF LAG seven-pass G-type receptor 1                               | CELSR1   | 1.97±0.45 | 1.60±0.32 | 1.50±0.40 | 1.22±0.15 |
| C2_2045   | Cadherin-1                                                                  | CDH1     | 1.60±0.24 | 1.11±0.16 | 1.15±0.14 | 1.52±0.27 |
| C2_3038   | Cadherin-17                                                                 | CDH17    | 1.27±0.17 | 1.06±0.16 | 1.83±0.44 | 1.07±0.13 |
| C2_20741  | Cadherin-23                                                                 | CDH23    | 1.99±0.70 | 0.66±0.15 | 0.34±0.07 | 0.61±0.21 |
| C2_5783   | Cadherin-related family member 2                                            | CDHR2    | 1.92±0.27 | 0.94±0.25 | 0.70±0.14 | 1.02±0.26 |
| C2_25329  | Cadherin-related family member 2                                            | CDHR2    | 2.04±0.26 | 1.16±0.20 | 1.22±0.27 | 1.20±0.36 |
| C2_70214  | Cadherin-related family member 2                                            | CDHR2    | 1.40±0.30 | 0.99±0.07 | 1.18±0.31 | 1.06±0.21 |
| C2_33603  | Calcium/calmodulin-dependent protein kinase type 1                          | CAMK1    | 0.72±0.31 | 3.15±1.49 | 1.68±0.46 | 1.10±0.32 |
| C2_54503  | Calcium/calmodulin-dependent protein kinase type II delta chain             | CAMK2D   | 1.26±0.29 | 1.33±0.23 | 0.91±0.10 | 0.96±0.19 |
| C2_22563  | Calcium/calmodulin-dependent protein kinase type II subunit gamma           | CAMK2G   | 1.06±0.12 | 1.27±0.31 | 1.31±0.26 | 1.36±0.40 |
| C2_1929   | Calcium-binding protein p22                                                 | CHP1     | 1.44±0.17 | 0.98±0.15 | 1.34±0.23 | 1.39±0.29 |
| C2_103184 | Calmodulin                                                                  | CALM1    | 0.53±0.06 | 1.31±0.16 | 1.13±0.18 | 0.93±0.22 |
| C2_98055  | Calmodulin-like protein 4                                                   | CALML4   | 0.88±0.23 | 1.06±0.30 | 1.08±0.41 | 2.06±0.73 |
| C2_19770  | Calnexin                                                                    | CANX     | 0.84±0.08 | 1.46±0.39 | 1.82±0.45 | 1.08±0.16 |
| C2_5497   | Calpain small subunit 1                                                     | CAPNS1   | 0.99±0.12 | 1.59±0.44 | 2.09±1.28 | 1.04±0.26 |
| C2_4520   | Calpain-2 catalytic subunit                                                 | CAPN2    | 0.90±0.20 | 0.91±0.13 | 0.77±0.11 | 0.85±0.17 |
| C2_1023   | Calreticulin                                                                | CALR     | 0.86±0.08 | 1.24±0.13 | 2.01±0.35 | 1.31±0.31 |
| C2_15813  | cAMP-dependent protein kinase catalytic subunit alpha                       | PRKACA   | 0.74±0.16 | 1.03±0.10 | 0.90±0.15 | 0.69±0.10 |
| C2_6010   | cAMP-dependent protein kinase type II-alpha regulatory subunit              | PRKAR2A  | 0.91±0.05 | 0.97±0.10 | 1.11±0.08 | 0.94±0.10 |
| C2_45801  | Caprin-2                                                                    | CAPRIN2  | 1.21±0.27 | 1.31±0.39 | 1.06±0.24 | 1.07±0.46 |
| C2_2482   | Carbohydrate kinase domain-containing protein                               | CARKD    | 1.53±0.21 | 1.57±0.35 | 1.66±0.49 | 1.27±0.40 |
| C2_1891   | Carbonic anhydrase 1                                                        | CA1      | 0.91±0.14 | 2.03±0.26 | 1.69±0.37 | 1.52±0.37 |
| C2_14726  | Carbonyl reductase [NADPH] 1                                                | CBR1     | 0.73±0.08 | 1.33±0.31 | 1.09±0.25 | 0.91±0.15 |
| C2_1812   | Carboxymethylglutaminylase homolog                                          | CMBL     | 2.32±0.49 | 1.25±0.25 | 0.92±0.22 | 1.37±0.33 |
| C2_936    | Carboxypeptidase A1                                                         | CPA1     | 2.27±0.46 | 0.75±0.17 | 1.08±0.67 | 2.80±1.16 |

|           |                                                           |          |           |           |           |           |
|-----------|-----------------------------------------------------------|----------|-----------|-----------|-----------|-----------|
| C2_5650   | Carboxypeptidase A2                                       | CPA2     | 1.73±0.20 | 0.91±0.10 | 0.85±0.29 | 1.74±0.64 |
| C2_2018   | Carboxypeptidase B                                        | CPB1     | 2.13±0.25 | 0.99±0.14 | 1.03±0.38 | 1.94±0.64 |
| C2_4458   | Carboxypeptidase O                                        | CPO      | 2.02±0.28 | 1.41±0.35 | 0.92±0.29 | 1.05±0.33 |
| C2_30675  | Carcinoembryonic antigen-related cell adhesion molecule 1 | CEACAM1  | 1.51±0.33 | 1.29±0.26 | 0.81±0.27 | 0.93±0.21 |
| C2_6038   | Carnitine O-acetyltransferase                             | CRAT     | 0.95±0.14 | 1.06±0.10 | 1.30±0.24 | 1.12±0.19 |
| C2_4920   | Carnitine O-palmitoyltransferase 1, liver isoform         | CPT1A    | 1.82±0.56 | 2.19±0.64 | 2.82±0.92 | 3.00±1.47 |
| C2_2166   | Carnitine O-palmitoyltransferase 2, mitochondrial         | CPT2     | 0.59±0.14 | 0.84±0.14 | 1.43±0.59 | 0.72±0.10 |
| C2_7099   | Casein kinase I isoform alpha                             | CSNK1A1  | 1.19±0.22 | 0.81±0.17 | 0.92±0.14 | 0.89±0.10 |
| C2_540    | Casein kinase II subunit alpha                            | CSNK2A1  | 0.64±0.07 | 0.85±0.09 | 0.81±0.12 | 0.80±0.12 |
| C2_16670  | Caspase-1                                                 | CASP1    | 0.77±0.18 | 0.95±0.28 | 1.10±0.36 | 1.09±0.30 |
| C2_85583  | Caspase-1-A                                               | CASP1-A  | 1.16±0.39 | 1.83±0.62 | 1.86±0.63 | 2.41±0.50 |
| C2_5709   | Caspase-6                                                 | CASP6    | 1.42±0.49 | 1.85±0.19 | 1.30±0.14 | 1.07±0.19 |
| C2_997    | Catalase                                                  | CAT      | 0.64±0.05 | 1.01±0.09 | 1.16±0.15 | 0.88±0.16 |
| C2_872    | Catechol O-methyltransferase domain-containing protein 1  | COMTD1   | 2.39±0.36 | 1.65±0.25 | 1.28±0.13 | 1.87±0.38 |
| C2_78432  | Catenin alpha-1                                           | CTNNA1   | 1.50±0.13 | 1.14±0.11 | 1.50±0.21 | 1.23±0.19 |
| C2_13472  | Catenin alpha-1                                           | CTNNA1   | 0.94±0.07 | 1.04±0.21 | 1.77±0.51 | 1.53±0.47 |
| C2_23957  | Catenin delta-1                                           | CTNND1   | 0.54±0.08 | 0.62±0.09 | 1.46±0.14 | 0.87±0.18 |
| C2_11960  | Cathepsin D                                               | CTSD     | 2.32±0.46 | 1.04±0.20 | 0.75±0.16 | 1.34±0.58 |
| C2_21     | Cathepsin L                                               | CTSL     | 2.15±0.48 | 1.73±0.37 | 1.55±0.40 | 1.22±0.27 |
| C2_108360 | Cathepsin S                                               | CTSS     | 2.02±0.50 | 1.58±0.20 | 1.42±0.27 | 1.33±0.40 |
| C2_2412   | Cell differentiation protein RCD1 homolog                 | RQCD1    | 0.90±0.17 | 1.18±0.23 | 1.04±0.12 | 1.15±0.29 |
| C2_12260  | cGMP-dependent protein kinase 2                           | PRKG1    | 0.94±0.16 | 0.88±0.09 | 0.98±0.22 | 1.15±0.18 |
| C2_1437   | Chloride intracellular channel protein 4                  | CLIC4    | 0.55±0.12 | 1.45±0.36 | 0.93±0.13 | 0.84±0.25 |
| C2_7684   | Chloride intracellular channel protein 5                  | CLIC5    | 0.81±0.19 | 2.77±1.46 | 5.15±2.70 | 2.04±0.99 |
| C2_5331   | Choline kinase alpha                                      | CHKA     | 1.83±0.35 | 1.05±0.20 | 0.94±0.21 | 1.13±0.40 |
| C2_7664   | Cholinesterase                                            | BCHE     | 1.27±0.19 | 0.80±0.10 | 0.83±0.27 | 0.87±0.13 |
| C2_12123  | Chymotrypsin A                                            | CTRB1    | 3.18±0.58 | 0.81±0.10 | 1.02±0.40 | 1.77±0.63 |
| C2_4647   | Chymotrypsin B                                            | CTRB2    | 4.32±1.10 | 0.74±0.10 | 0.71±0.21 | 2.69±1.23 |
| C2_8139   | Chymotrypsin-C                                            | CTRC     | 2.19±0.19 | 0.67±0.09 | 0.62±0.20 | 1.75±0.80 |
| C2_9094   | Chymotrypsin-like elastase family member 2A               | CELA2A   | 2.14±0.45 | 0.52±0.08 | 0.91±0.33 | 1.41±0.59 |
| C2_6507   | Chymotrypsin-like elastase family member 3B               | CELA3B   | 2.84±0.64 | 0.70±0.11 | 0.56±0.10 | 1.29±0.40 |
| C2_4909   | Chymotrypsin-like protease CTRL-1                         | CTRL     | 2.88±0.68 | 0.66±0.15 | 0.81±0.27 | 1.28±0.42 |
| C2_2740   | Citrate synthase, mitochondrial                           | CS       | 1.17±0.24 | 1.25±0.19 | 1.31±0.41 | 1.15±0.40 |
| C2_15910  | Clathrin heavy chain 1                                    | CLTC     | 0.90±0.05 | 1.02±0.10 | 0.93±0.11 | 1.10±0.08 |
| C2_18775  | Clathrin heavy chain 1                                    | CLTC     | 0.54±0.07 | 0.76±0.22 | 0.92±0.25 | 0.92±0.25 |
| C2_13187  | Clathrin heavy chain 1                                    | CLTC     | 0.73±0.09 | 0.85±0.17 | 1.09±0.24 | 1.03±0.24 |
| C2_19700  | Clathrin interactor 1                                     | CLINT1   | 0.90±0.22 | 0.99±0.14 | 0.83±0.12 | 0.85±0.04 |
| C2_1094   | Cleavage and polyadenylation specificity factor subunit 5 | NUDT21   | 1.05±0.22 | 1.62±0.43 | 1.82±0.69 | 1.07±0.29 |
| C2_76527  | Coactosin-like protein                                    | COTL1    | 1.30±0.14 | 1.55±0.41 | 1.80±0.48 | 1.20±0.21 |
| C2_5592   | Coatamer subunit alpha                                    | COPA     | 0.97±0.16 | 1.46±0.18 | 1.18±0.11 | 1.10±0.25 |
| C2_66184  | Coatamer subunit alpha                                    | COPA     | 0.69±0.20 | 0.81±0.15 | 1.10±0.25 | 1.02±0.23 |
| C2_4111   | Coatamer subunit beta                                     | COPB1    | 0.83±0.07 | 1.19±0.12 | 1.64±0.35 | 1.03±0.19 |
| C2_27574  | Coatamer subunit beta                                     | COPB1    | 0.81±0.10 | 1.00±0.11 | 1.03±0.17 | 0.91±0.17 |
| C2_6399   | Coatamer subunit beta'                                    | COPB2    | 1.07±0.04 | 1.09±0.10 | 0.99±0.09 | 1.11±0.12 |
| C2_5687   | Coatamer subunit delta                                    | ARCN1    | 0.89±0.08 | 0.98±0.17 | 0.85±0.15 | 1.13±0.17 |
| C2_191    | Coatamer subunit epsilon                                  | COPE     | 0.78±0.11 | 1.19±0.18 | 1.20±0.08 | 1.04±0.26 |
| C2_3555   | Coatamer subunit gamma-2                                  | COPG2    | 1.08±0.13 | 1.03±0.08 | 1.38±0.19 | 1.10±0.12 |
| C2_120873 | Cocaine esterase                                          | COCE     | 1.51±0.29 | 1.38±0.13 | 0.92±0.22 | 1.40±0.26 |
| C2_1192   | Cofilin-2                                                 | COFL2    | 0.75±0.11 | 1.06±0.15 | 2.01±0.74 | 2.12±0.78 |
| C2_7703   | Coiled-coil domain-containing protein 22                  | CCDC22   | 1.50±1.26 | 1.24±0.89 | 1.77±1.14 | 1.54±0.72 |
| C2_36566  | Cold-inducible RNA-binding protein A                      | CIRBP    | 0.71±0.22 | 0.68±0.11 | 0.93±0.30 | 1.03±0.41 |
| C2_6735   | Collagen type IV alpha-3-binding protein                  | COL4A3BP | 1.08±0.20 | 0.90±0.10 | 1.06±0.21 | 1.27±0.17 |
| C2_15503  | Collectin-12                                              | COLEC12  | 2.01±0.32 | 3.85±1.11 | 1.93±0.25 | 1.91±0.38 |
| C2_481    | COMM domain-containing protein 2                          | COMMD2   | 1.50±0.64 | 2.14±0.92 | 3.82±1.84 | 3.85±1.50 |
| C2_1725   | COMM domain-containing protein 7                          | COMMD7   | 1.23±0.15 | 1.54±0.35 | 1.12±0.19 | 1.81±0.54 |
| C2_2765   | Complement C1q tumor necrosis factor-related protein 3    | C1QTNF3  | 1.60±0.45 | 5.42±2.13 | 1.65±0.76 | 0.95±0.18 |
| C2_107825 | Complement C1q-like protein 2                             | C1QL2    | 2.31±0.33 | 0.97±0.20 | 1.65±0.84 | 1.31±0.39 |
| C2_1398   | Complement C3                                             | C3       | 1.06±0.11 | 2.29±0.55 | 0.93±0.12 | 0.85±0.12 |
| C2_23904  | Complement C4-B                                           | C4A/C4B  | 1.11±0.10 | 1.14±0.14 | 0.96±0.17 | 0.78±0.14 |
| C2_2093   | Complement component C6                                   | C6       | 0.69±0.06 | 1.59±0.44 | 1.70±0.45 | 0.83±0.08 |
| C2_9760   | Complement factor B                                       | CFB      | 0.84±0.12 | 1.97±0.50 | 0.95±0.14 | 0.91±0.10 |
| C2_121665 | Complement factor D                                       | CFD      | 1.19±0.29 | 1.36±0.32 | 1.17±0.22 | 1.16±0.23 |
| C2_2374   | Complement factor H                                       | CFH      | 0.91±0.16 | 1.04±0.16 | 0.79±0.11 | 0.80±0.11 |
| C2_1203   | COP9 signalosome complex subunit 5                        | COP5     | 0.81±0.22 | 1.20±0.22 | 1.33±0.28 | 0.60±0.14 |
| C2_6548   | Copine-1                                                  | CPNE1    | 1.18±0.16 | 0.83±0.15 | 1.37±0.23 | 1.07±0.33 |
| C2_2684   | Copine-3                                                  | CPNE3    | 0.88±0.15 | 0.83±0.15 | 1.07±0.19 | 1.03±0.18 |
| C2_3222   | Copper homeostasis protein cutC homolog                   | CUTC     | 1.26±0.20 | 1.32±0.06 | 1.15±0.06 | 1.05±0.14 |
| C2_113919 | Copper transport protein ATOX1                            | ATOX1    | 1.05±0.18 | 1.24±0.25 | 2.53±0.85 | 1.61±0.34 |
| C2_2051   | Coproporphyrinogen-III oxidase, mitochondrial             | CPOX     | 1.64±0.25 | 1.01±0.16 | 1.01±0.16 | 1.41±0.41 |
| C2_451    | Coronin-1A                                                | CORO1A   | 1.26±0.17 | 1.00±0.10 | 0.93±0.09 | 1.19±0.15 |
| C2_690    | Creatine kinase B-type                                    | CKB      | 1.13±0.25 | 1.68±0.28 | 1.33±0.19 | 1.19±0.27 |
| C2_24223  | Creatine kinase U-type, mitochondrial                     | CKMT1A   | 2.00±0.39 | 1.06±0.19 | 1.11±0.29 | 1.87±0.44 |
| C2_29254  | Crk-like protein                                          | CRKL     | 1.48±0.20 | 1.01±0.12 | 0.98±0.24 | 1.15±0.26 |
| C2_1078   | Crystallin J1C                                            | CJ1C     | 1.03±0.12 | 1.04±0.14 | 1.24±0.22 | 1.28±0.22 |
| C2_1820   | Cystathionine beta-synthase                               | CBS      | 1.36±0.31 | 1.91±0.44 | 1.73±0.34 | 1.37±0.32 |
| C2_2620   | Cystathionine gamma-lyase                                 | CTH      | 1.18±0.13 | 2.02±0.23 | 1.71±0.26 | 1.45±0.33 |
| C2_617    | Cystatin-B                                                | CSTB     | 1.19±0.13 | 1.25±0.17 | 1.31±0.23 | 1.21±0.09 |
| C2_9620   | Cysteine sulfinic acid decarboxylase                      | CSAD     | 0.84±0.21 | 1.34±0.31 | 0.95±0.05 | 0.87±0.12 |
| C2_42628  | Cysteine-rich protein 1                                   | CRIP1    | 0.81±0.21 | 1.43±0.40 | 1.35±0.25 | 1.79±0.44 |

|                  |                                                                               |           |             |             |             |             |
|------------------|-------------------------------------------------------------------------------|-----------|-------------|-------------|-------------|-------------|
| C2_4479          | CysteinyI-tRNA synthetase, cytoplasmic                                        | CARS      | 0.84±0.11   | 1.21±0.16   | 0.84±0.12   | 0.95±0.12   |
| C2_12715         | Cytochrome b5                                                                 | CYB5A     | 1.55±0.23   | 1.08±0.19   | 1.19±0.22   | 1.27±0.22   |
| C2_2189          | Cytochrome c                                                                  | LOC690675 | 1.41±0.31   | 1.20±0.24   | 1.28±0.33   | 1.62±0.45   |
| C2_785           | Cytochrome c1, heme protein, mitochondrial                                    | CYC1      | 32.67±19.93 | 10.75±9.69  | 7.98±6.81   | 28.71±17.47 |
| C2_46314         | Cytochrome c-b                                                                | CYCB      | 1.59±0.36   | 1.13±0.20   | 1.09±0.29   | 1.54±0.39   |
| C2_13986         | Cytochrome P450 2D26                                                          | Cyp2d26   | 1.27±0.09   | 1.02±0.15   | 1.04±0.07   | 1.22±0.14   |
| C2_4087          | Cytochrome P450 2J2                                                           | CYP2J2    | 0.77±0.08   | 0.95±0.25   | 1.02±0.26   | 0.98±0.17   |
| C2_57426         | Cytochrome P450 2K3                                                           | CYP2K3    | 1.29±0.18   | 2.14±0.60   | 1.57±0.47   | 1.86±0.61   |
| C2_2493          | Cytochrome P450 3A40                                                          | CYP3A40   | 0.70±0.12   | 0.80±0.11   | 0.81±0.20   | 0.93±0.19   |
| C2_2851          | Cytoplasmic aconitate hydratase                                               | ACO1      | 1.18±0.10   | 1.04±0.10   | 0.87±0.11   | 0.87±0.08   |
| C2_68872         | Cytoplasmic aconitate hydratase                                               | ACO1      | 0.86±0.09   | 1.16±0.11   | 0.92±0.09   | 0.97±0.11   |
| s_flp0006b09_f_1 | Cytoplasmic aconitate hydratase                                               | ACO1      | 0.99±0.08   | 1.45±0.23   | 2.21±0.69   | 1.89±0.50   |
| C2_16351         | Cytoplasmic dynein 1 heavy chain 1                                            | DYNC1H1   | 0.75±0.08   | 0.91±0.07   | 1.16±0.18   | 0.83±0.17   |
| C2_39955         | Cytoplasmic dynein 1 heavy chain 1                                            | DYNC1H1   | 0.64±0.12   | 0.57±0.03   | 0.93±0.27   | 0.91±0.13   |
| C2_5034          | Cytoplasmic dynein 1 heavy chain 1                                            | DYNC1H1   | 0.71±0.08   | 0.78±0.06   | 0.98±0.20   | 0.86±0.09   |
| C2_82382         | Cytoplasmic dynein 1 heavy chain 1                                            | DYNC1H1   | 1.18±0.15   | 0.75±0.20   | 0.77±0.29   | 1.09±0.27   |
| C2_7060          | Cytoplasmic dynein 1 intermediate chain 2                                     | Dynci2    | 0.97±0.08   | 1.01±0.13   | 1.13±0.27   | 1.57±0.28   |
| C2_928           | Cytosolic non-specific dipeptidase                                            | CNDP2     | 0.86±0.08   | 1.09±0.20   | 1.24±0.24   | 1.13±0.18   |
| C2_5757          | Cytosolic purine 5'-nucleotidase                                              | NT5C2     | 1.60±0.36   | 1.43±0.23   | 0.98±0.14   | 1.10±0.21   |
| C2_70910         | Cytosolic sulfotransferase 1                                                  | SOT1      | 0.76±0.13   | 0.76±0.11   | 0.98±0.17   | 1.16±0.30   |
| C2_2270          | Cytosolic sulfotransferase 3                                                  | SOT3      | 0.69±0.06   | 0.80±0.13   | 1.18±0.29   | 1.16±0.32   |
| C2_7372          | D-amino-acid oxidase                                                          | DAO       | 0.76±0.09   | 1.04±0.22   | 1.26±0.21   | 0.92±0.20   |
| C2_1763          | D-dopachrome decarboxylase                                                    | DDT       | 1.82±0.28   | 1.62±0.18   | 0.86±0.12   | 1.17±0.24   |
| C2_3999          | Dehydrogenase/reductase SDR family member 1                                   | DHRS1     | 0.99±0.08   | 0.85±0.13   | 0.97±0.07   | 1.09±0.17   |
| C2_34491         | Dehydrogenase/reductase SDR family member 11                                  | DHRS11    | 2.02±0.36   | 1.26±0.16   | 1.28±0.12   | 1.47±0.16   |
| C2_35778         | Dehydrogenase/reductase SDR family member 12                                  | DHRS12    | 1.07±0.14   | 1.22±0.11   | 0.80±0.13   | 1.10±0.07   |
| C2_43533         | Dehydrogenase/reductase SDR family member 7B                                  | DHRS7B    | 1.95±0.43   | 1.31±0.40   | 1.31±0.21   | 1.64±0.43   |
| C2_9536          | Deleted in malignant brain tumors 1 protein                                   | DMBT1     | 3.78±1.85   | 0.75±0.29   | 0.68±0.21   | 1.60±0.95   |
| C2_12746         | Delta(24)-sterol reductase                                                    | DHCR24    | 1.28±0.35   | 1.00±0.19   | 2.16±0.52   | 1.68±0.28   |
| C2_17169         | Delta-aminolevulinic acid dehydratase                                         | ALAD      | 1.49±0.28   | 1.23±0.19   | 0.87±0.16   | 1.01±0.20   |
| C2_94566         | Deoxyribonuclease-1                                                           | DNASE1    | 2.29±0.39   | 0.65±0.12   | 0.67±0.26   | 1.11±0.42   |
| C2_20476         | Desmoplakin                                                                   | DSP       | 1.05±0.17   | 1.12±0.19   | 0.87±0.10   | 0.96±0.20   |
| C2_521           | Diablo homolog, mitochondrial                                                 | DIABLO    | 17.66±16.47 | 32.38±19.76 | 27.74±17.65 | 17.98±16.41 |
| C2_83822         | Diacylglycerol kinase alpha                                                   | DGKA      | 0.92±0.45   | 1.65±0.23   | 1.33±0.30   | 0.99±0.37   |
| C2_5593          | Dihydrolipoyl dehydrogenase, mitochondrial                                    | DLD       | 1.69±0.40   | 1.41±0.33   | 1.41±0.37   | 1.68±0.39   |
| C2_9224          | Dimethylalanine monooxygenase [N-oxide-forming] 5                             | FMO5      | 0.94±0.20   | 0.74±0.23   | 0.90±0.30   | 1.24±0.25   |
| C2_192           | Dipeptidase 1                                                                 | DPEP1     | 2.06±0.44   | 1.47±0.36   | 0.84±0.21   | 0.96±0.25   |
| C2_14794         | Dipeptidyl peptidase 3                                                        | DPP3      | 1.22±0.20   | 0.96±0.14   | 0.70±0.11   | 1.24±0.32   |
| C2_40681         | Dipeptidyl peptidase 3                                                        | DPP3      | 1.37±0.24   | 1.12±0.20   | 0.98±0.26   | 1.55±0.45   |
| C2_46432         | Dipeptidyl peptidase 3                                                        | DPP3      | 1.43±0.15   | 1.18±0.17   | 1.12±0.33   | 1.34±0.29   |
| C2_1242          | Dipeptidyl peptidase 4                                                        | DPP4      | 2.36±0.34   | 1.10±0.17   | 0.90±0.22   | 1.33±0.42   |
| C2_7518          | Diphosphomevalonate decarboxylase                                             | MVD       | 0.86±0.10   | 1.22±0.18   | 1.20±0.09   | 1.08±0.17   |
| C2_4400          | Disabled homolog 2                                                            | DAB2      | 0.96±0.16   | 1.17±0.13   | 1.48±0.45   | 1.78±0.61   |
| C2_15432         | DNA damage-binding protein 1                                                  | DDB1      | 1.04±0.15   | 1.16±0.14   | 0.94±0.14   | 0.81±0.12   |
| C2_2056          | DNA-(apurinic or apyrimidinic site) lyase                                     | APEX1     | 1.86±0.51   | 2.32±0.31   | 1.50±0.11   | 1.81±0.49   |
| C2_1240          | Dolichyl-diphosphooligosaccharide--protein glycosyltransferase 48 kDa subunit | DDOST     | 0.83±0.11   | 0.73±0.13   | 1.03±0.21   | 0.96±0.17   |
| C2_37060         | Dolichyl-diphosphooligosaccharide--protein glycosyltransferase subunit 1      | RPN1      | 0.95±0.22   | 1.08±0.14   | 1.70±0.38   | 1.25±0.32   |
| C2_3023          | Dolichyl-diphosphooligosaccharide--protein glycosyltransferase subunit 1      | RPN1      | 1.13±0.20   | 0.85±0.15   | 1.17±0.21   | 1.28±0.28   |
| C2_1591          | Dolichyl-diphosphooligosaccharide--protein glycosyltransferase subunit 2      | RPN2      | 1.01±0.10   | 1.01±0.14   | 1.42±0.22   | 1.22±0.36   |
| C2_1500          | Dolichyl-diphosphooligosaccharide--protein glycosyltransferase subunit STT3A  | STT3A     | 1.13±0.09   | 1.02±0.19   | 1.56±0.45   | 1.13±0.29   |
| C2_8403          | Drebrin-like protein B                                                        | DBN1      | 1.01±0.19   | 1.16±0.30   | 2.12±1.04   | 0.93±0.06   |
| C2_10485         | D-serine dehydratase                                                          | SRR       | 1.16±0.20   | 1.21±0.13   | 1.01±0.16   | 0.95±0.09   |
| C2_6083          | D-serine dehydratase                                                          | SRR       | 1.54±0.40   | 1.72±0.17   | 1.55±0.14   | 1.56±0.23   |
| C2_1808          | Dual specificity protein phosphatase 23                                       | DUSP23    | 1.12±0.26   | 1.36±0.44   | 1.18±0.35   | 1.14±0.25   |
| C2_10012         | Dynactin subunit 2                                                            | DCTN2     | 0.79±0.17   | 0.67±0.11   | 0.97±0.27   | 1.17±0.25   |
| C2_64914         | Dynactin subunit 3                                                            | DCTN3     | 0.59±0.09   | 0.74±0.24   | 1.93±0.92   | 2.01±0.95   |
| C2_3772          | Dynammin-1-like protein                                                       | DNM1L     | 0.87±0.18   | 1.02±0.20   | 2.05±0.44   | 1.20±0.48   |
| C2_6275          | Dynammin-2                                                                    | DNM2      | 0.89±0.11   | 0.79±0.08   | 1.29±0.44   | 1.45±0.38   |
| C2_27580         | Dynein light chain 2, cytoplasmic                                             | DYNLL2    | 0.84±0.11   | 1.32±0.34   | 1.12±0.10   | 1.19±0.31   |
| C2_1338          | E3 ubiquitin-protein ligase HUWE1                                             | HUWE1     | 0.87±0.09   | 1.26±0.08   | 0.98±0.06   | 0.96±0.15   |
| C2_73398         | E3 ubiquitin-protein ligase HUWE1                                             | HUWE1     | 0.61±0.17   | 1.20±0.14   | 1.67±0.48   | 1.05±0.32   |
| C2_4136          | Echinoderm microtubule-associated protein-like 1                              | EML1      | 0.82±0.08   | 1.16±0.21   | 0.84±0.06   | 1.03±0.12   |
| C2_29850         | Ectonucleotide pyrophosphatase/phosphodiesterase family member 3              | ENPP3     | 2.48±0.47   | 1.02±0.27   | 0.62±0.16   | 1.23±0.47   |
| C2_53228         | Ectonucleotide pyrophosphatase/phosphodiesterase family member 3              | ENPP3     | 1.83±0.19   | 1.04±0.13   | 0.89±0.23   | 1.14±0.34   |
| C2_2589          | Ectonucleotide pyrophosphatase/phosphodiesterase family member 6              | ENPP6     | 1.87±0.21   | 1.08±0.17   | 0.81±0.16   | 0.88±0.14   |
| C2_8279          | Ectonucleotide pyrophosphatase/phosphodiesterase family member 7              | ENPP7     | 1.54±0.13   | 1.16±0.27   | 1.23±0.24   | 1.35±0.29   |
| C2_8820          | EF-hand domain-containing protein D2                                          | EFHD2     | 1.03±0.08   | 1.27±0.18   | 1.30±0.21   | 0.78±0.16   |
| C2_25319         | EH domain-containing protein 1                                                | EHD1      | 0.83±0.04   | 0.97±0.10   | 1.23±0.26   | 1.18±0.21   |
| C2_4289          | Elastase-1                                                                    | CELA1     | 3.18±0.62   | 0.60±0.06   | 1.06±0.62   | 1.84±0.70   |
| C2_18            | Elongation factor 1-alpha                                                     | EEF1A     | 0.91±0.09   | 0.84±0.09   | 1.59±0.46   | 1.88±0.69   |

|           |                                                                    |          |           |           |           |           |
|-----------|--------------------------------------------------------------------|----------|-----------|-----------|-----------|-----------|
| C2_344    | Elongation factor 1-beta                                           | EEF1B2   | 0.61±0.09 | 0.81±0.21 | 1.21±0.50 | 1.10±0.30 |
| C2_25907  | Elongation factor 1-delta                                          | EEF1D    | 1.19±0.17 | 1.15±0.16 | 1.12±0.10 | 1.39±0.19 |
| C2_55     | Elongation factor 1-gamma                                          | EEF1G    | 0.83±0.08 | 1.05±0.18 | 0.97±0.16 | 1.20±0.17 |
| C2_534    | Elongation factor 2                                                | EEF2     | 0.73±0.06 | 0.96±0.18 | 1.45±0.35 | 1.19±0.27 |
| C2_11409  | Endoplasmic reticulum aminopeptidase 1                             | ERAP1    | 0.68±0.10 | 0.77±0.21 | 0.90±0.22 | 0.92±0.23 |
| C2_21801  | Endoplasmic reticulum resident protein 44                          | ERP44    | 1.08±0.23 | 1.36±0.25 | 2.04±0.44 | 1.41±0.41 |
| C2_13119  | Enolase                                                            | ENO      | 0.83±0.23 | 1.47±0.17 | 0.97±0.22 | 0.75±0.16 |
| C2_3722   | Enoyl-CoA hydratase, mitochondrial                                 | ECHS1    | 0.95±0.13 | 0.57±0.12 | 0.78±0.21 | 1.12±0.29 |
| C2_646    | Eosinophil peroxidase                                              | EPX      | 2.16±1.04 | 0.77±0.17 | 0.74±0.21 | 0.58±0.14 |
| C2_118    | Ependymin                                                          | EPD      | 3.10±0.68 | 2.07±0.28 | 1.99±0.67 | 1.86±0.46 |
| C2_117429 | Ependymin-2                                                        | EPD2     | 5.14±1.28 | 2.90±0.38 | 5.13±2.27 | 3.41±0.88 |
| C2_14283  | Epidermal growth factor receptor kinase substrate 8-like protein 2 | EPS8L2   | 1.05±0.18 | 1.01±0.19 | 1.21±0.25 | 1.05±0.21 |
| C2_5498   | Epidermal growth factor receptor kinase substrate 8-like protein 3 | EPS8L3   | 0.69±0.07 | 1.24±0.29 | 0.99±0.08 | 1.05±0.18 |
| C2_782    | Epididymal secretory protein E1                                    | NPC2     | 3.76±1.13 | 3.46±0.64 | 3.31±1.27 | 2.17±0.58 |
| C2_6684   | Epoxide hydrolase 1                                                | EPHX1    | 1.23±0.22 | 0.90±0.37 | 1.36±0.34 | 1.28±0.49 |
| C2_22855  | Epoxide hydrolase 2                                                | EPHX2    | 1.31±0.13 | 1.65±0.33 | 1.92±0.43 | 2.18±0.35 |
| C2_1732   | Erythrocyte band 7 integral membrane protein                       | STOM     | 1.51±0.22 | 1.17±0.07 | 1.19±0.22 | 1.55±0.24 |
| C2_800    | ES1 protein homolog, mitochondrial                                 | C21orf33 | 1.39±0.18 | 1.23±0.10 | 0.88±0.10 | 1.18±0.22 |
| C2_4860   | Ester hydrolase C11orf54 homolog                                   | C11orf54 | 1.65±0.36 | 1.43±0.17 | 1.04±0.06 | 1.30±0.18 |
| C2_12674  | Estradiol 17-beta-dehydrogenase 12-B                               | HSD17B12 | 1.27±0.15 | 1.37±0.34 | 1.45±0.20 | 1.50±0.19 |
| C2_3321   | Ethanolamine-phosphate cytidylyltransferase                        | PCYT2    | 1.12±0.19 | 1.44±0.24 | 1.51±0.52 | 1.46±0.26 |
| C2_406    | Eukaryotic initiation factor 4A-I                                  | EIF4A1   | 0.73±0.15 | 0.85±0.19 | 1.05±0.30 | 1.19±0.31 |
| C2_746    | Eukaryotic initiation factor 4A-II                                 | EIF4A2   | 1.00±0.15 | 1.10±0.13 | 0.80±0.09 | 0.90±0.16 |
| C2_4011   | Eukaryotic translation initiation factor 2 subunit 1               | EIF2S1   | 0.86±0.15 | 1.56±0.34 | 1.29±0.13 | 1.12±0.27 |
| C2_533    | Eukaryotic translation initiation factor 3 subunit A               | EIF3A    | 0.59±0.05 | 1.17±0.28 | 0.78±0.09 | 0.89±0.10 |
| C2_630    | Eukaryotic translation initiation factor 3 subunit B               | EIF3B    | 1.22±0.19 | 1.29±0.14 | 0.92±0.06 | 0.97±0.12 |
| C2_541    | Eukaryotic translation initiation factor 3 subunit D               | EIF3D    | 0.94±0.13 | 1.05±0.10 | 1.02±0.05 | 0.97±0.16 |
| C2_114    | Eukaryotic translation initiation factor 3 subunit E               | EIF3E    | 2.20±1.19 | 1.42±0.45 | 1.28±0.29 | 1.63±0.26 |
| C2_92     | Eukaryotic translation initiation factor 3 subunit F               | EIF3F    | 0.94±0.12 | 0.91±0.06 | 1.03±0.18 | 1.00±0.12 |
| C2_19263  | Eukaryotic translation initiation factor 3 subunit J-A             | EIF3J    | 0.86±0.23 | 1.03±0.13 | 0.93±0.18 | 0.88±0.14 |
| C2_372    | Eukaryotic translation initiation factor 3 subunit L               | EIF3L    | 0.81±0.13 | 1.43±0.21 | 1.23±0.29 | 1.04±0.19 |
| C2_68     | Eukaryotic translation initiation factor 3 subunit M               | EIF3M    | 0.44±0.13 | 1.39±0.19 | 1.33±0.30 | 0.76±0.19 |
| C2_2506   | Eukaryotic translation initiation factor 4 gamma 1                 | EIF4G1   | 1.02±0.08 | 0.89±0.20 | 0.65±0.15 | 0.96±0.10 |
| C2_6179   | Eukaryotic translation initiation factor 5                         | EIF5     | 1.03±0.13 | 1.26±0.22 | 1.65±0.68 | 1.65±0.34 |
| C2_6319   | Eukaryotic translation initiation factor 6                         | EIF6     | 1.17±0.16 | 0.92±0.12 | 0.82±0.13 | 0.85±0.13 |
| C2_54734  | Exportin-1                                                         | XPO1     | 0.63±0.34 | 2.12±0.62 | 1.34±0.31 | 0.97±0.28 |
| C2_10706  | Ezrin                                                              | EZR      | 0.90±0.12 | 0.64±0.05 | 1.12±0.26 | 1.53±0.48 |
| C2_24358  | Ezrin                                                              | EZR      | 0.65±0.07 | 0.90±0.14 | 1.07±0.19 | 0.99±0.19 |
| C2_356    | F-actin-capping protein subunit alpha-1                            | CAPZA1   | 1.21±0.18 | 1.07±0.20 | 1.18±0.18 | 1.35±0.29 |
| C2_207    | F-actin-capping protein subunit alpha-2                            | CAPZA2   | 0.91±0.17 | 1.80±0.25 | 1.34±0.09 | 1.26±0.12 |
| C2_227    | F-actin-capping protein subunit beta                               | CAPZB    | 0.79±0.06 | 1.48±0.17 | 1.09±0.07 | 1.03±0.13 |
| C2_10323  | Farnesyl pyrophosphate synthase                                    | FDPS     | 1.27±0.47 | 1.92±0.73 | 2.35±1.05 | 2.32±0.72 |
| C2_7862   | FAS-associated factor 1                                            | FAF1     | 1.14±0.16 | 1.22±0.12 | 1.06±0.12 | 0.90±0.24 |
| C2_8342   | Fatty acid-binding protein, brain                                  | FABP7    | 1.78±0.49 | 2.27±0.41 | 1.39±0.16 | 1.80±0.56 |
| C2_168    | Fatty acid-binding protein, heart                                  | FABP3    | 0.64±0.06 | 1.29±0.37 | 1.07±0.17 | 1.27±0.53 |
| C2_28163  | Fatty acid-binding protein, intestinal                             | FABP2    | 0.41±0.06 | 1.51±0.52 | 1.55±0.46 | 1.80±0.60 |
| C2_51889  | Fatty acid-binding protein, intestinal                             | FABP2    | 0.57±0.06 | 2.55±0.96 | 2.62±0.91 | 3.14±1.21 |
| C2_23355  | Fatty acid-binding protein, liver-type                             | FABP1    | 2.04±0.33 | 2.09±0.32 | 1.44±0.26 | 1.59±0.26 |
| C2_5343   | Fatty aldehyde dehydrogenase                                       | ALDH3A2  | 1.99±0.45 | 1.19±0.41 | 1.81±0.49 | 2.04±0.67 |
| C2_10150  | F-box only protein 22                                              | FBXO22   | 1.30±0.48 | 2.12±0.37 | 2.76±1.04 | 0.99±0.24 |
| C2_5555   | FCH domain only protein 2                                          | FCHO2    | 1.04±0.11 | 1.35±0.12 | 1.31±0.15 | 1.15±0.15 |
| C2_37659  | Female protein                                                     | WTAP     | 1.10±0.13 | 0.74±0.06 | 0.80±0.17 | 1.36±0.49 |
| FP331537  | Fibrinogen alpha chain                                             | FGA      | 1.40±0.23 | 1.27±0.20 | 0.90±0.16 | 0.95±0.28 |
| FP339542  | Fibrinogen beta chain                                              | FGB      | 1.57±0.22 | 1.05±0.14 | 0.77±0.17 | 0.88±0.22 |
| FP332283  | Fibrinogen beta chain                                              | FGB      | 1.75±0.31 | 1.51±0.28 | 1.08±0.13 | 1.10±0.24 |
| C2_38689  | Fibrinogen gamma chain                                             | FGG      | 1.31±0.27 | 1.39±0.32 | 0.78±0.13 | 0.96±0.15 |
| C2_58470  | Fibronectin                                                        | FN1      | 1.21±0.10 | 0.95±0.07 | 0.89±0.16 | 0.98±0.21 |
| C2_5254   | Fibronectin                                                        | FN1      | 0.84±0.09 | 1.31±0.29 | 1.15±0.39 | 0.91±0.21 |
| C2_63263  | Fibronectin                                                        | FN1      | 1.16±0.22 | 1.29±0.29 | 1.22±0.55 | 0.96±0.22 |
| C2_6274   | Filamin-A                                                          | FLNA     | 1.80±0.26 | 1.02±0.10 | 1.00±0.25 | 1.00±0.19 |
| C2_79807  | Filamin-B                                                          | FLNB     | 1.84±0.27 | 1.52±0.27 | 1.19±0.23 | 1.48±0.19 |
| C2_65152  | Filamin-C                                                          | FLNC     | 1.35±0.70 | 1.65±0.85 | 2.86±0.96 | 1.66±0.59 |
| C2_6583   | FK506-binding protein 1                                            | FK506-BP | 0.82±0.04 | 1.40±0.28 | 1.26±0.24 | 1.34±0.28 |
| C2_1227   | Flavin reductase (NADPH)                                           | BLVRB    | 1.05±0.18 | 1.52±0.58 | 1.32±0.31 | 1.14±0.19 |
| C2_6545   | Fructose-1,6-bisphosphatase 1                                      | FBP1     | 0.61±0.08 | 1.79±0.26 | 1.33±0.14 | 1.11±0.28 |
| C2_185    | Fructose-bisphosphate aldolase B                                   | ALDOB    | 0.89±0.09 | 1.98±0.50 | 2.89±0.83 | 2.53±0.85 |
| C2_1285   | Fructose-bisphosphate aldolase C-B                                 | ALDOC    | 0.98±0.15 | 1.04±0.12 | 0.94±0.14 | 0.87±0.09 |
| C2_23658  | Fructose-bisphosphate aldolase, muscle type                        | FBEM2    | 1.00±0.27 | 1.24±0.21 | 1.51±0.53 | 0.90±0.22 |
| C2_32246  | Fucoatlectin                                                       | FCL      | 2.14±0.47 | 1.60±0.47 | 0.80±0.11 | 0.92±0.28 |
| C2_116478 | Fucoatlectin-5                                                     | FCL5     | 2.34±0.56 | 0.92±0.09 | 1.71±1.05 | 0.80±0.18 |
| C2_24896  | Fumarylacetoacetate hydrolase domain-containing protein 1          | FAHD1    | 1.80±0.36 | 0.96±0.17 | 0.94±0.12 | 1.38±0.35 |
| C2_1568   | Fumarylacetoacetate hydrolase domain-containing protein 2          | FAHD2B   | 1.51±0.14 | 1.15±0.11 | 0.94±0.13 | 1.15±0.16 |
| C2_2035   | Galactocerebrosidase                                               | GALC     | 1.45±0.19 | 0.92±0.13 | 0.86±0.12 | 1.36±0.32 |
| C2_28569  | Galectin-3                                                         | LGALS3   | 0.75±0.12 | 0.86±0.16 | 0.68±0.11 | 0.68±0.09 |
| C2_985    | Galectin-9                                                         | LGALS9B  | 1.75±0.31 | 1.10±0.12 | 1.05±0.12 | 1.15±0.19 |
| C2_5451   | Gamma-butyrobetaine dioxygenase                                    | BBOX1    | 1.67±0.20 | 1.18±0.24 | 1.32±0.48 | 1.06±0.22 |
| AM954422  | Gamma-glutamylaminocyclotransferase A                              | GGACT    | 1.38±0.22 | 1.47±0.18 | 0.90±0.04 | 0.89±0.14 |

|           |                                                                    |           |           |            |           |           |
|-----------|--------------------------------------------------------------------|-----------|-----------|------------|-----------|-----------|
| C2_15180  | Gamma-glutamylcyclotransferase                                     | GGCT      | 1.14±0.25 | 1.39±0.25  | 1.08±0.17 | 1.04±0.25 |
| C2_1354   | Gamma-glutamyltranspeptidase 1                                     | GGT1      | 1.62±0.36 | 0.89±0.10  | 0.70±0.13 | 0.91±0.24 |
| C2_63     | Gamma-interferon-inducible lysosomal thiol reductase               | IFI30     | 2.26±0.35 | 1.00±0.08  | 0.80±0.29 | 1.29±0.40 |
| C2_34628  | Gastric intrinsic factor                                           | GIF       | 1.81±0.29 | 1.30±0.30  | 1.06±0.56 | 0.75±0.18 |
| C2_750    | Gastrotropin                                                       | FABP6     | 0.91±0.14 | 1.05±0.06  | 0.90±0.19 | 1.06±0.21 |
| C2_14681  | GDH/6PGL endoplasmic bifunctional protein                          | H6PD      | 1.41±0.25 | 1.01±0.16  | 1.67±0.37 | 0.98±0.16 |
| C2_265    | Gelsolin                                                           | GSN       | 1.04±0.16 | 1.74±0.15  | 1.28±0.17 | 1.04±0.20 |
| C2_768    | Glucosamine-6-phosphate isomerase 1                                | GNPDA1    | 0.87±0.07 | 1.21±0.31  | 1.10±0.13 | 1.10±0.20 |
| C2_20259  | Glucosamine--fructose-6-phosphate aminotransferase [isomerizing] 2 | GNPDA2    | 0.96±0.24 | 0.78±0.09  | 1.59±0.57 | 0.98±0.13 |
| C2_5943   | Glucose-6-phosphate 1-dehydrogenase                                | G6PD      | 0.65±0.06 | 0.91±0.12  | 1.01±0.22 | 0.91±0.21 |
| C2_394    | Glucose-6-phosphate isomerase                                      | GPI       | 2.13±0.32 | 1.25±0.28  | 1.19±0.33 | 1.45±0.35 |
| C2_1745   | Glucosylceramidase                                                 | GBA       | 2.08±0.31 | 1.06±0.23  | 1.03±0.29 | 1.36±0.38 |
| C2_10880  | Glucuronokinase 1                                                  | GLCAK1    | 0.78±0.12 | 0.91±0.14  | 0.79±0.08 | 1.21±0.15 |
| C2_3924   | Glutamate dehydrogenase, mitochondrial                             | GLUD1     | 0.74±0.07 | 1.45±0.25  | 1.53±0.50 | 0.95±0.18 |
| C2_2794   | Glutamate--cysteine ligase catalytic subunit                       | GCLC      | 1.13±0.07 | 0.94±0.11  | 1.17±0.16 | 1.20±0.11 |
| C2_944    | Glutamine synthetase                                               | GLUL      | 1.02±0.14 | 0.84±0.12  | 0.87±0.22 | 1.01±0.16 |
| C2_4118   | Glutamyl aminopeptidase                                            | ENPEP     | 1.90±0.36 | 1.43±0.36  | 0.97±0.19 | 1.07±0.35 |
| C2_6320   | Glutaredoxin 3                                                     | GLRX3     | 0.77±0.10 | 0.99±0.19  | 0.85±0.14 | 0.96±0.15 |
| C2_345    | Glutathione peroxidase 1                                           | GPX1      | 1.93±0.46 | 1.02±0.24  | 0.70±0.22 | 1.47±0.51 |
| C2_296    | Glutathione peroxidase 2                                           | GPX2      | 2.08±0.30 | 0.89±0.15  | 0.92±0.21 | 1.30±0.33 |
| C2_19719  | Glutathione reductase, mitochondrial                               | GSR       | 1.73±0.25 | 1.04±0.13  | 1.19±0.40 | 1.29±0.34 |
| C2_5598   | Glutathione S-transferase 3                                        | GSTA3     | 1.12±0.37 | 1.48±0.15  | 0.92±0.21 | 0.90±0.23 |
| C2_117130 | Glutathione S-transferase A                                        | GSTA1     | 1.13±0.28 | 2.81±0.83  | 1.73±0.37 | 1.48±0.41 |
| C2_112663 | Glutathione S-transferase A4                                       | GSTA4     | 0.90±0.48 | 2.08±0.32  | 1.30±0.20 | 1.32±0.31 |
| C2_430    | Glutathione S-transferase kappa 1                                  | GSTK1     | 2.28±0.49 | 1.00±0.12  | 1.02±0.18 | 1.20±0.26 |
| C2_868    | Glutathione S-transferase Mu 3                                     | Gstm3     | 0.83±0.22 | 1.62±0.17  | 1.15±0.11 | 0.92±0.26 |
| C2_1065   | Glutathione S-transferase omega-1                                  | GSTO1     | 1.03±0.11 | 1.40±0.15  | 0.94±0.13 | 1.12±0.12 |
| C2_1660   | Glutathione S-transferase theta-1                                  | Gstt1     | 0.88±0.14 | 1.12±0.36  | 1.03±0.23 | 0.91±0.20 |
| C2_5198   | Glutathione S-transferase theta-4                                  | Gstt4     | 0.60±0.09 | 1.39±0.56  | 1.62±0.71 | 1.90±0.74 |
| C2_25988  | Glutathione synthetase                                             | GSS       | 1.44±0.24 | 1.22±0.21  | 1.04±0.26 | 1.12±0.29 |
| C2_29     | Glyceraldehyde 3-phosphate dehydrogenase, testis-specific          | GAPDHS    | 2.31±0.52 | 1.89±0.09  | 1.29±0.15 | 1.66±0.34 |
| C2_17     | Glyceraldehyde-3-phosphate dehydrogenase                           | GAPDH     | 2.67±0.56 | 1.52±0.23  | 1.58±0.07 | 2.71±0.35 |
| C2_688    | Glycerol-3-phosphate dehydrogenase [NAD+], cytoplasmic             | GPD1      | 1.86±0.79 | 2.21±1.31  | 3.01±2.19 | 3.60±2.54 |
| C2_2813   | Glycerol-3-phosphate dehydrogenase 1-like protein                  | GPD1L     | 0.80±0.15 | 0.94±0.17  | 1.37±0.44 | 1.34±0.48 |
| C2_9479   | Glycine cleavage system H protein, mitochondrial                   | GCSH      | 2.54±0.53 | 1.59±0.22  | 1.92±0.72 | 1.89±0.70 |
| C2_27493  | Glycine N-methyltransferase                                        | GNMT      | 0.58±0.11 | 0.76±0.26  | 1.08±0.44 | 0.97±0.28 |
| C2_15427  | Glycogen debranching enzyme                                        | AGL       | 0.72±0.36 | 1.10±0.15  | 0.92±0.26 | 0.67±0.20 |
| C2_1350   | Glycolipid transfer protein                                        | GLTP      | 0.60±0.09 | 0.91±0.10  | 0.88±0.12 | 0.70±0.15 |
| C2_637    | Glycylpeptide N-tetradecanoyltransferase 1                         | NMT1      | 0.86±0.14 | 1.26±0.24  | 1.36±0.27 | 1.06±0.20 |
| C2_1726   | Glycyl-tRNA synthetase                                             | GLYS      | 0.88±0.07 | 1.11±0.08  | 1.18±0.25 | 0.97±0.21 |
| C2_2114   | Glyoxalase domain-containing protein 4                             | GLOD4     | 0.82±0.10 | 1.36±0.17  | 1.02±0.17 | 1.25±0.22 |
| C2_2680   | Glyoxalase domain-containing protein 5                             | GLOD5     | 1.90±0.60 | 0.80±0.10  | 1.26±0.33 | 0.62±0.16 |
| C2_1994   | Glyoxylate reductase/hydroxypyruvate reductase                     | GRHPR     | 1.57±0.16 | 1.07±0.15  | 1.04±0.11 | 1.52±0.28 |
| C2_3971   | Grancalcin                                                         | GCA       | 0.91±0.03 | 1.47±0.35  | 1.78±0.35 | 1.49±0.59 |
| C2_4717   | Growth factor receptor-bound protein 2                             | GRB2      | 0.87±0.10 | 0.98±0.10  | 0.90±0.09 | 0.99±0.05 |
| C2_26978  | GTPase IMAP family member 2                                        | GIMAP2    | 2.51±0.65 | 2.27±0.68  | 1.79±0.24 | 2.16±0.65 |
| C2_1141   | GTP-binding nuclear protein Ran                                    | RAN       | 0.71±0.10 | 1.03±0.15  | 1.35±0.23 | 1.04±0.25 |
| C2_1272   | GTP-binding protein SAR1b                                          | SAR1B     | 0.58±0.09 | 0.70±0.15  | 1.19±0.44 | 1.27±0.47 |
| C2_762    | Guanidinoacetate N-methyltransferase                               | GAMT      | 0.71±0.05 | 1.79±0.21  | 1.37±0.32 | 1.22±0.28 |
| C2_829    | Guanine nucleotide-binding protein G(i) subunit alpha-2            | GNAI2     | 0.77±0.10 | 1.15±0.19  | 1.05±0.23 | 1.12±0.24 |
| C2_3700   | Guanine nucleotide-binding protein G(o) subunit alpha              | GNAO1     | 1.25±0.36 | 1.96±0.98  | 4.38±1.74 | 1.76±0.57 |
| C2_17403  | Guanine nucleotide-binding protein G(q) subunit alpha              | GNAQ      | 1.09±0.25 | 0.76±0.14  | 0.62±0.11 | 0.95±0.31 |
| C2_45     | Guanine nucleotide-binding protein subunit beta-2-like 1           | GNB2L1    | 0.55±0.09 | 0.72±0.05  | 1.03±0.19 | 0.71±0.11 |
| C2_5901   | Harmonin                                                           | USH1C     | 0.90±0.08 | 1.02±0.18  | 0.96±0.19 | 1.10±0.11 |
| C2_13612  | Heat shock 70 kDa protein 4                                        | HSPA4     | 0.70±0.28 | 1.16±0.33  | 1.57±0.34 | 1.07±0.38 |
| C2_58     | Heat shock cognate 70 kDa protein                                  | Hspa1b    | 0.79±0.04 | 1.58±0.17  | 1.61±0.35 | 1.25±0.17 |
| C2_2116   | Heat shock protein 105 kDa                                         | HSPH1     | 0.77±0.06 | 0.89±0.11  | 1.43±0.28 | 1.07±0.25 |
| C2_7127   | Hemoglobin subunit alpha-A                                         | HBAA      | 1.68±0.53 | 1.57±0.40  | 0.68±0.17 | 0.89±0.28 |
| C2_5435   | Hemoglobin subunit alpha-B                                         | HBAB      | 1.64±0.57 | 2.07±0.66  | 0.78±0.24 | 0.88±0.31 |
| C2_105738 | Hemoglobin subunit beta                                            | HBB       | 1.32±0.40 | 1.65±0.32  | 0.82±0.15 | 0.78±0.17 |
| C2_102093 | Hemoglobin subunit beta                                            | HBB       | 1.69±0.51 | 1.78±0.53  | 0.90±0.21 | 1.17±0.44 |
| C2_78448  | Hemoglobin subunit beta-A                                          | Hbb-b2    | 1.54±0.51 | 1.32±0.31  | 0.74±0.29 | 1.08±0.52 |
| C2_27397  | Hemopexin                                                          | HPX       | 1.11±0.14 | 1.75±0.39  | 0.93±0.19 | 1.11±0.37 |
| C2_1739   | Hepatoma-derived growth factor                                     | HDGF      | 0.77±0.12 | 1.09±0.26  | 0.80±0.20 | 0.78±0.12 |
| C2_6512   | Heterogeneous nuclear ribonucleoprotein A/B                        | HNRNPAB   | 0.85±0.08 | 1.15±0.41  | 1.31±0.46 | 1.41±0.38 |
| C2_24145  | Heterogeneous nuclear ribonucleoprotein A1                         | Hnrnpa1   | 1.05±0.22 | 1.77±0.31  | 1.19±0.30 | 1.36±0.18 |
| C2_26519  | Heterogeneous nuclear ribonucleoprotein Q                          | SYNCRIP   | 0.85±0.10 | 1.23±0.07  | 0.99±0.11 | 0.96±0.11 |
| C2_1517   | Heterogeneous nuclear ribonucleoprotein U-like protein 1           | HNRNPUL1  | 0.97±0.10 | 1.31±0.15  | 1.02±0.12 | 1.44±0.19 |
| C2_75390  | Hexokinase-1                                                       | HK1       | 1.50±0.18 | 1.51±0.82  | 1.89±0.63 | 1.46±0.47 |
| C2_8165   | Hibernation-specific plasma protein HP-55                          | HP55      | 1.49±0.23 | 1.53±0.24  | 0.95±0.25 | 1.12±0.21 |
| C2_11749  | High choriolytic enzyme 1                                          | HCEA      | 3.01±0.40 | 0.65±0.08  | 0.90±0.41 | 1.70±0.59 |
| C2_1967   | Histamine N-methyltransferase A                                    | HNMT      | 0.48±0.06 | 1.36±0.56  | 0.69±0.13 | 0.74±0.17 |
| C2_9935   | Histidyl-tRNA synthetase, cytoplasmic                              | HARS2     | 0.86±0.11 | 1.27±0.12  | 1.31±0.09 | 0.84±0.16 |
| C2_65292  | Histidyl-tRNA synthetase, cytoplasmic                              | HARS2     | 0.93±0.18 | 1.09±0.10  | 0.70±0.10 | 0.65±0.06 |
| C2_29246  | Histone deacetylase 9-B                                            | HDAC9B    | 1.26±0.46 | 16.35±3.14 | 7.86±2.40 | 6.91±5.53 |
| C2_3677   | Histone H1                                                         | H1FO      | 1.15±0.19 | 0.59±0.07  | 0.96±0.13 | 1.63±0.29 |
| C2_12456  | Histone H2A                                                        | H2AFB3    | 1.07±0.13 | 1.13±0.19  | 3.24±1.00 | 2.49±1.14 |
| C2_101057 | Histone H2B 1/2                                                    | HIST2H2BE | 1.06±0.26 | 1.86±0.55  | 1.68±0.73 | 1.85±0.82 |



|             |                                                                             |            |           |           |           |           |
|-------------|-----------------------------------------------------------------------------|------------|-----------|-----------|-----------|-----------|
| C2_117463   | Histone H4                                                                  | HIST1H4A   | 0.82±0.04 | 1.05±0.15 | 1.90±0.82 | 1.51±0.38 |
| C2_3745     | Histone-binding protein RBBP4                                               | RBBP4      | 0.73±0.08 | 0.90±0.12 | 0.97±0.08 | 0.91±0.09 |
| C2_25525    | Host cell factor 1                                                          | HCFC1      | 2.28±0.28 | 1.59±0.42 | 0.76±0.13 | 1.14±0.27 |
| C2_16741    | Host cell factor 1                                                          | HCFC1      | 1.34±0.15 | 0.99±0.19 | 0.79±0.16 | 0.81±0.21 |
| C2_17788    | Huntingtin                                                                  | HTT        | 6.60±5.68 | 2.19±1.25 | 2.09±0.98 | 1.86±0.74 |
| C2_23228    | Hyaluronidase-1                                                             | HYAL1      | 2.42±0.44 | 0.92±0.12 | 0.85±0.27 | 1.45±0.41 |
| C2_465      | Hydroxyacyl-coenzyme A dehydrogenase, mitochondrial                         | HADH       | 2.19±0.46 | 1.03±0.17 | 1.27±0.29 | 1.50±0.35 |
| C2_610      | Hydroxyacylglutathione hydrolase, mitochondrial                             | HAGH       | 0.89±0.16 | 1.11±0.14 | 0.88±0.09 | 0.67±0.11 |
| C3_c25627   | Hypothetical protein LOC100692391                                           | GIMAP8     | 1.16±0.29 | 1.10±0.36 | 0.86±0.30 | 1.18±0.55 |
| C2_679      | Hypoxanthine-guanine phosphoribosyltransferase                              | HPRT1      | 0.46±0.06 | 1.66±0.21 | 1.01±0.22 | 1.09±0.28 |
| C2_13391    | IgGfc-binding protein                                                       | FCGBP      | 2.12±0.13 | 0.99±0.20 | 1.09±0.36 | 1.25±0.36 |
| C2_46036    | Immunoglobulin M heavy chain                                                | IGHM       | 1.06±0.14 | 2.16±0.78 | 0.83±0.16 | 0.93±0.14 |
| C2_2478     | Immunoglobulin-binding protein 1                                            | IGBP1      | 0.45±0.20 | 1.65±0.73 | 5.58±2.84 | 2.20±0.62 |
| C3_lrc8695  | Importin subunit beta-1                                                     | KPNB1      | 1.26±0.19 | 1.49±0.31 | 1.69±0.38 | 1.45±0.25 |
| C2_14281    | Importin-7                                                                  | IPO7       | 0.49±0.13 | 0.88±0.19 | 1.79±0.31 | 0.76±0.34 |
| C2_78142    | Inositol monophosphatase 2                                                  | IMPA2      | 1.49±0.28 | 1.94±0.32 | 1.65±0.55 | 1.12±0.11 |
| C2_13269    | Inositol polyphosphate 5-phosphatase OCRL-1                                 | OCRL       | 0.48±0.18 | 1.24±0.31 | 1.35±0.32 | 1.06±0.34 |
| C2_8119     | Insulin-like growth factor binding protein complex acid liable subunit      | IGFALS     | 1.76±0.30 | 1.19±0.07 | 1.10±0.10 | 1.43±0.30 |
| C2_36156    | Intelectin-2                                                                | ITLN2      | 2.04±0.36 | 0.92±0.10 | 0.99±0.44 | 1.11±0.37 |
| FP333792    | Inter-alpha-trypsin inhibitor heavy chain H2                                | ITIH2      | 0.83±0.33 | 1.14±0.06 | 1.37±0.51 | 1.09±0.22 |
| C2_12615    | Inter-alpha-trypsin inhibitor heavy chain H3                                | ITIH3      | 0.94±0.09 | 2.05±0.42 | 1.37±0.21 | 1.19±0.29 |
| C3_lrc30120 | Inter-alpha-trypsin inhibitor heavy chain H3-like                           | ITIH3      | 1.06±0.07 | 1.98±0.39 | 1.00±0.10 | 1.00±0.19 |
| C2_624      | Interferon-induced 35 kDa protein homolog                                   | IFI35      | 1.66±0.21 | 1.19±0.09 | 1.04±0.14 | 1.39±0.36 |
| C2_9595     | Interferon-induced protein with tetratricopeptide repeats 1                 | IFIT1B     | 0.90±0.16 | 1.34±0.25 | 0.71±0.14 | 0.92±0.18 |
| C2_8010     | Interleukin enhancer-binding factor 2 homolog                               | ILF2       | 0.84±0.23 | 1.07±0.23 | 1.56±0.43 | 1.05±0.27 |
| C2_118270   | Intermediate filament protein ON3                                           | ION3       | 0.59±0.10 | 1.11±0.39 | 1.06±0.16 | 0.90±0.14 |
| C2_2049     | Intestinal-type alkaline phosphatase                                        | ALPI       | 1.30±0.14 | 1.41±0.19 | 1.41±0.36 | 1.38±0.31 |
| C2_17229    | Isochorismatase domain-containing protein 2, mitochondrial                  | ISOC2      | 1.15±0.16 | 1.24±0.18 | 0.97±0.18 | 0.74±0.11 |
| C2_2044     | Isopentenyl-diphosphate Delta-isomerase 1                                   | IDI1       | 1.00±0.14 | 0.88±0.14 | 0.81±0.17 | 1.43±0.44 |
| C2_2160     | Isovaleryl-CoA dehydrogenase, mitochondrial                                 | IVD        | 2.14±0.32 | 1.25±0.19 | 1.20±0.34 | 0.94±0.13 |
| C2_18025    | IST1 homolog                                                                | IST1       | 0.96±0.09 | 1.22±0.29 | 1.05±0.17 | 0.98±0.17 |
| C2_2147     | Junction plakoglobin                                                        | JUP        | 0.81±0.11 | 1.07±0.28 | 1.79±0.72 | 1.43±0.41 |
| C2_23019    | Junction plakoglobin                                                        | JUP        | 0.66±0.14 | 1.04±0.24 | 1.16±0.29 | 1.16±0.30 |
| C2_1814     | Junctional adhesion molecule A                                              | F11R       | 0.87±0.05 | 1.06±0.10 | 1.22±0.17 | 0.82±0.18 |
| C2_2372     | Keratin, type I cytoskeletal 18                                             | KRT18      | 1.56±0.20 | 1.16±0.15 | 0.95±0.10 | 1.09±0.19 |
| C2_116635   | Keratin, type I cytoskeletal 18-A                                           | KRT18A     | 2.06±0.44 | 1.04±0.37 | 0.66±0.27 | 1.24±0.49 |
| C2_86457    | Keratin, type I cytoskeletal 19                                             | KRT19      | 0.74±0.12 | 1.25±0.10 | 1.03±0.11 | 0.88±0.14 |
| C2_1442     | Keratin, type II cytoskeletal 8                                             | KRT8       | 1.45±0.21 | 1.24±0.32 | 0.95±0.20 | 1.17±0.30 |
| C2_2275     | Ketohexokinase                                                              | KHK        | 1.42±0.10 | 1.54±0.27 | 1.12±0.07 | 1.55±0.31 |
| C2_1049     | KH domain-containing, RNA-binding, signal transduction-associated protein 1 | KHDRBS1    | 0.64±0.08 | 1.26±0.25 | 1.12±0.21 | 1.28±0.40 |
| C2_3990     | Kinectin                                                                    | Ktn1       | 1.03±0.12 | 0.58±0.11 | 1.07±0.29 | 1.02±0.16 |
| C2_4980     | Kinectin                                                                    | Ktn1       | 0.73±0.30 | 0.63±0.07 | 1.83±1.01 | 1.80±0.80 |
| C2_7678     | Kinesin light chain 1                                                       | KLC1       | 0.86±0.11 | 0.77±0.08 | 0.93±0.28 | 0.89±0.09 |
| C2_29495    | Kininogen                                                                   | Kng1/Kng11 | 1.82±0.26 | 1.13±0.15 | 1.07±0.09 | 0.90±0.23 |
| C2_29253    | Kynureninase                                                                | KYNU       | 1.21±0.12 | 1.05±0.16 | 0.93±0.17 | 0.84±0.06 |
| C2_1795     | Kynurenine--oxoglutarate transaminase 1                                     | CCBL1      | 1.15±0.20 | 1.26±0.15 | 1.33±0.23 | 1.14±0.13 |
| C2_17959    | Lactase-phlorizin hydrolase                                                 | LCT        | 2.35±0.31 | 1.08±0.18 | 1.05±0.26 | 1.16±0.40 |
| C2_5123     | Lactase-phlorizin hydrolase                                                 | LCT        | 2.11±0.26 | 0.97±0.18 | 0.89±0.23 | 1.12±0.39 |
| C2_380      | Lactoylglutathione lyase                                                    | GLO1       | 1.77±0.23 | 0.99±0.15 | 0.94±0.19 | 1.26±0.27 |
| C2_4354     | Lambda-crystallin homolog                                                   | CRYL1      | 1.81±0.28 | 1.11±0.13 | 1.01±0.16 | 1.34±0.22 |
| C2_36474    | Lanosterol synthase                                                         | LSS        | 0.59±0.14 | 0.80±0.30 | 1.79±0.59 | 2.20±0.64 |
| C2_21093    | L-asparaginase                                                              | ASPG       | 1.33±0.19 | 1.35±0.29 | 1.16±0.29 | 1.40±0.40 |
| C2_141      | Latexin                                                                     | LXN        | 1.46±0.16 | 1.26±0.19 | 0.83±0.13 | 0.84±0.18 |
| C2_18261    | Leucine-rich alpha-2-glycoprotein                                           | LRG1       | 1.66±0.27 | 1.73±0.30 | 1.27±0.17 | 1.36±0.22 |
| C2_2628     | Leukocyte elastase inhibitor                                                | SERPINB1   | 2.50±0.48 | 1.14±0.26 | 1.17±0.26 | 1.58±0.36 |
| C2_695      | Leukotriene A-4 hydrolase                                                   | LTA4H      | 1.43±0.30 | 1.75±0.20 | 1.20±0.17 | 1.16±0.21 |
| C2_95063    | Lipid phosphate phosphohydrolase 1                                          | Ppap2a     | 1.69±0.49 | 0.71±0.19 | 0.86±0.26 | 1.55±0.60 |
| C2_22890    | Lipocalin                                                                   | LCN1       | 1.00±0.09 | 1.07±0.12 | 1.06±0.21 | 1.13±0.12 |
| C2_25312    | Lipopolysaccharide-responsive and beige-like anchor protein                 | LRBA       | 0.97±0.11 | 1.25±0.22 | 1.02±0.15 | 1.03±0.14 |
| C2_61943    | LisH domain and HEAT repeat-containing protein KIAA1468 homolog             | KIAA1468   | 1.94±0.36 | 1.30±0.43 | 0.97±0.09 | 1.06±0.17 |
| C2_17725    | Lissencephaly-1 homolog A                                                   | PAFAH1B1   | 1.15±0.20 | 1.16±0.15 | 0.94±0.11 | 0.90±0.17 |
| C2_6672     | Liver carboxylesterase                                                      | CES1       | 2.06±0.43 | 1.35±0.33 | 1.50±0.56 | 1.60±0.35 |
| C2_13242    | Liver carboxylesterase 2                                                    | CES2       | 2.17±0.61 | 1.21±0.33 | 1.28±0.52 | 1.32±0.25 |
| C2_1393     | L-lactate dehydrogenase A chain                                             | LDHA       | 0.83±0.06 | 1.76±0.09 | 1.28±0.19 | 1.03±0.12 |
| C2_6197     | L-lactate dehydrogenase B chain                                             | LDHB       | 0.85±0.07 | 1.10±0.15 | 1.02±0.19 | 1.08±0.13 |
| C2_22040    | Long-chain fatty acid transport protein 4                                   | SLC27A4    | 1.12±0.12 | 0.95±0.18 | 1.30±0.14 | 1.08±0.13 |
| C2_12825    | Long-chain specific acyl-CoA dehydrogenase, mitochondrial                   | ACADL      | 1.43±0.24 | 1.08±0.15 | 1.18±0.27 | 1.23±0.23 |
| C2_10278    | Long-chain-fatty-acid--CoA ligase 5                                         | ACSL5      | 0.76±0.05 | 0.60±0.11 | 0.87±0.27 | 1.19±0.34 |
| C2_12320    | Long-chain-fatty-acid--CoA ligase ACSBG2                                    | ACSBG2     | 0.83±0.19 | 1.29±0.21 | 0.92±0.31 | 0.79±0.10 |
| C2_57935    | Low molecular weight phosphotyrosine protein phosphatase                    | ACP1       | 1.18±0.15 | 1.11±0.14 | 1.13±0.19 | 1.37±0.29 |
| C2_8471     | Lumican                                                                     | LUM        | 1.01±0.10 | 2.97±0.97 | 1.54±0.21 | 1.56±0.27 |
| C2_3622     | Lysozyme g                                                                  | LYG1       | 0.94±0.07 | 1.56±0.31 | 1.44±0.21 | 1.60±0.41 |
| C2_3105     | Lysyl-tRNA synthetase                                                       | KARS       | 0.80±0.06 | 0.77±0.10 | 1.11±0.14 | 0.85±0.09 |
| C2_439      | Macrophage migration inhibitory factor                                      | MIF        | 1.95±0.37 | 1.21±0.18 | 1.25±0.17 | 1.73±0.32 |
| C2_5305     | Macrophage-capping protein                                                  | CAPG       | 1.16±0.15 | 1.40±0.10 | 0.95±0.06 | 1.00±0.22 |

|           |                                                                      |           |             |             |             |           |
|-----------|----------------------------------------------------------------------|-----------|-------------|-------------|-------------|-----------|
| C2_121640 | Major histocompatibility complex class I-related gene protein        | MR1       | 2.00±0.32   | 1.46±0.25   | 1.17±0.29   | 1.17±0.18 |
| C2_72990  | Major vault protein                                                  | MVP       | 0.91±0.12   | 1.31±0.59   | 3.13±1.31   | 2.28±0.95 |
| C2_11452  | Malate dehydrogenase, cytoplasmic                                    | MDH1      | 0.56±0.03   | 1.55±0.33   | 1.24±0.23   | 1.16±0.31 |
| C2_612    | Malate dehydrogenase, mitochondrial                                  | MDH2      | 1.11±0.12   | 1.51±0.14   | 1.89±0.35   | 1.53±0.48 |
| C2_1846   | Maltase-glucoamylase, intestinal                                     | MGAM      | 2.26±0.41   | 0.93±0.16   | 0.92±0.24   | 1.69±0.74 |
| C2_23669  | Mannose-1-phosphate guanylttransferase beta                          | GMPPB     | 1.06±0.19   | 0.93±0.13   | 1.06±0.26   | 1.31±0.22 |
| C2_19667  | Mannose-6-phosphate isomerase                                        | MPI       | 0.98±0.21   | 1.12±0.15   | 0.77±0.12   | 0.85±0.13 |
| C2_27538  | Mannosyl-oligosaccharide 1,2-alpha-mannosidase IA                    | MAN1A1    | 1.89±0.35   | 1.15±0.17   | 1.22±0.38   | 1.03±0.19 |
| C2_1554   | Medium-chain specific acyl-CoA dehydrogenase, mitochondrial          | ACADM     | 1.81±0.32   | 1.15±0.23   | 1.30±0.21   | 1.04±0.24 |
| C2_4129   | Melanotransferrin                                                    | MFI2      | 1.87±0.29   | 1.55±0.52   | 0.84±0.18   | 0.95±0.15 |
| C2_1403   | Meprin A subunit alpha                                               | MEP1A     | 2.74±0.63   | 0.84±0.07   | 0.81±0.27   | 0.85±0.19 |
| C2_5461   | Meprin A subunit beta                                                | MEP1B     | 2.49±0.49   | 0.88±0.13   | 0.92±0.19   | 1.07±0.24 |
| C2_1481   | Mesoderm-specific transcript homolog protein                         | MEST      | 1.32±0.25   | 1.09±0.25   | 0.79±0.23   | 0.69±0.14 |
| C2_5987   | Methylmalonate-semialdehyde dehydrogenase [acylating], mitochondrial | ALDH6A1   | 1.03±0.07   | 1.35±0.15   | 1.66±0.49   | 1.00±0.11 |
| C2_327    | Methyltransferase-like protein 7A                                    | METTL7A   | 0.96±0.08   | 0.77±0.17   | 0.97±0.18   | 1.14±0.26 |
| C2_830    | Microsomal glutathione S-transferase 3                               | MGST3     | 0.69±0.19   | 0.73±0.22   | 1.42±0.68   | 0.60±0.17 |
| C2_7905   | Microsomal triglyceride transfer protein large subunit               | MTTP      | 0.66±0.05   | 0.92±0.16   | 1.37±0.32   | 0.88±0.17 |
| C2_8412   | Mitochondrial enolase superfamily member 1                           | ENOSF1    | 1.12±0.18   | 0.90±0.07   | 1.11±0.16   | 0.85±0.12 |
| C2_198    | Mitochondrial fission 1 protein                                      | FIS1      | 0.43±0.07   | 1.18±0.28   | 0.88±0.25   | 0.92±0.28 |
| C2_10488  | Mitogen-activated protein kinase 1                                   | MAPK1     | 0.68±0.10   | 0.87±0.15   | 0.76±0.15   | 1.25±0.45 |
| C2_3688   | Mitogen-activated protein kinase 14A                                 | MAPK14    | 1.02±0.28   | 0.87±0.17   | 1.01±0.19   | 0.98±0.27 |
| C2_86     | Moiesin                                                              | MSN       | 0.99±0.10   | 1.18±0.16   | 0.78±0.04   | 0.88±0.13 |
| C2_99049  | Monofunctional C1-tetrahydrofolate synthase, mitochondrial           | MTHFD1L   | 0.99±0.28   | 0.71±0.06   | 0.80±0.19   | 1.51±0.36 |
| C2_2814   | Motile sperm domain-containing protein 2                             | MOSPD2    | 1.04±0.15   | 1.20±0.21   | 0.97±0.16   | 1.11±0.28 |
| C2_1615   | Mucin-13                                                             | MUC13     | 1.93±0.27   | 1.17±0.18   | 0.86±0.16   | 1.15±0.20 |
| C2_3396   | Mucin-2                                                              | MUC2      | 1.76±0.27   | 1.37±0.19   | 0.85±0.22   | 1.53±0.36 |
| C2_22932  | Mucin-2-like                                                         | MUC2-L    | 0.92±0.08   | 1.40±0.36   | 0.69±0.10   | 1.08±0.16 |
| FP338380  | Murinoglobulin-1                                                     | Mug1/Mug2 | 1.66±0.25   | 1.81±0.37   | 1.02±0.21   | 1.11±0.29 |
| C2_3500   | Myosin light polypeptide 6                                           | MYL6      | 1.08±0.18   | 1.34±0.14   | 1.42±0.38   | 1.23±0.18 |
| C2_838    | Myosin regulatory light chain 2, smooth muscle minor isoform         | MYL12B    | 1.26±0.26   | 1.35±0.11   | 1.77±0.41   | 1.15±0.20 |
| C2_25606  | Myosin-10                                                            | MYH10     | 0.87±0.25   | 1.67±0.73   | 1.47±0.37   | 1.15±0.50 |
| C2_19728  | Myosin-9                                                             | MYH9      | 0.86±0.12   | 0.84±0.09   | 1.06±0.11   | 1.02±0.10 |
| C2_65856  | Myosin-1c                                                            | MYO1C     | 0.93±0.06   | 1.03±0.16   | 0.96±0.20   | 1.24±0.21 |
| C2_62971  | Myosin-1c                                                            | MYO1C     | 0.95±0.21   | 0.97±0.18   | 1.01±0.13   | 0.95±0.28 |
| C2_21024  | N(G),N(G)-dimethylarginine dimethylaminohydrolase 1                  | DDAH1     | 1.35±0.25   | 1.50±0.16   | 0.98±0.14   | 0.91±0.13 |
| C2_24043  | Na(+)/H(+) exchange regulatory cofactor NHE-RF1                      | SLC9A3R1  | 0.90±0.04   | 0.89±0.06   | 1.32±0.40   | 1.45±0.29 |
| C2_3136   | Na(+)/H(+) exchange regulatory cofactor NHE-RF3                      | PDZK1     | 0.77±0.09   | 1.09±0.10   | 0.99±0.05   | 1.00±0.22 |
| C2_50960  | Na(+)/H(+) exchange regulatory cofactor NHE-RF4                      | PDZD3     | 0.74±0.24   | 0.90±0.38   | 1.12±0.23   | 1.67±0.42 |
| C2_6312   | N-acetylated-alpha-linked acidic dipeptidase-like protein            | NAALADL1  | 1.63±0.18   | 1.02±0.16   | 0.97±0.18   | 1.11±0.28 |
| C2_2369   | N-acetyl-D-glucosamine kinase                                        | NAGK      | 1.28±0.14   | 0.91±0.14   | 0.87±0.21   | 1.27±0.31 |
| C2_14558  | N-acetylgalactosamine kinase                                         | GALK2     | 0.82±0.14   | 0.91±0.07   | 1.17±0.24   | 1.13±0.14 |
| C2_2102   | N-acyl-phosphatidylethanolamine-hydrolyzing phospholipase D          | NAPEPLD   | 1.48±0.35   | 1.35±0.48   | 0.97±0.21   | 1.21±0.21 |
| C2_4705   | NAD-dependent malic enzyme, mitochondrial                            | ME2       | 1.12±0.19   | 1.26±0.24   | 1.20±0.31   | 1.01±0.24 |
| C2_357    | NADH-cytochrome b5 reductase 2                                       | CYB5R2    | 1.26±0.22   | 1.07±0.13   | 1.56±0.40   | 1.55±0.36 |
| C2_568    | NADH-cytochrome b5 reductase 3                                       | Cyb5r3    | 0.65±0.07   | 0.69±0.13   | 1.20±0.35   | 0.80±0.18 |
| C2_1776   | NADP-dependent isocitrate dehydrogenase                              | IDH1      | 0.58±0.04   | 1.67±0.54   | 1.43±0.34   | 1.37±0.31 |
| C2_3984   | NADP-dependent malic enzyme                                          | ME1       | 0.79±0.08   | 1.17±0.15   | 1.29±0.21   | 1.29±0.26 |
| C2_4956   | NADP-dependent malic enzyme, mitochondrial                           | ME3       | 1.16±0.12   | 1.46±0.19   | 1.63±0.48   | 1.15±0.21 |
| C2_2964   | NADPH--cytochrome P450 reductase                                     | POR       | 0.99±0.10   | 0.98±0.14   | 1.08±0.17   | 1.01±0.13 |
| C2_9509   | N-alpha-acetyltransferase 38, NatC auxiliary subunit                 | NAA38     | 1.47±0.24   | 1.20±0.13   | 1.54±0.22   | 1.33±0.14 |
| C2_43416  | Neutral alpha-glucosidase AB                                         | GANAB     | 1.13±0.10   | 1.02±0.12   | 0.92±0.14   | 1.02±0.13 |
| C2_4237   | Neutral alpha-glucosidase AB                                         | GANAB     | 1.28±0.14   | 1.11±0.21   | 1.31±0.22   | 1.30±0.20 |
| C2_4635   | Neutral and basic amino acid transport protein rBAT                  | SLC3A1    | 1.72±0.18   | 1.15±0.18   | 1.04±0.19   | 1.48±0.47 |
| C2_18906  | Neutral ceramidase                                                   | ASAH2     | 2.17±0.35   | 1.51±0.42   | 1.00±0.32   | 1.07±0.35 |
| C2_14365  | Neutral ceramidase                                                   | ASAH2     | 1.96±0.27   | 1.79±0.50   | 1.16±0.44   | 0.96±0.22 |
| C2_2429   | NHP2-like protein 1                                                  | NHP2L1    | 1.38±0.40   | 1.93±0.29   | 1.37±0.26   | 1.41±0.32 |
| C2_5958   | Nicastrin                                                            | NCSTN     | 2.44±0.46   | 1.25±0.35   | 1.32±0.25   | 1.70±0.37 |
| C2_1457   | Nicotinamide phosphoribosyltransferase                               | NAMPT     | 1.37±0.30   | 0.82±0.17   | 1.70±0.50   | 1.33±0.36 |
| C2_4414   | Niemann-Pick C1-like protein 1                                       | NPC1L1    | 2.47±0.54   | 1.14±0.12   | 0.95±0.38   | 1.21±0.31 |
| C2_14786  | Non-lysosomal glucosylceramidase                                     | GBA2      | 1.82±0.11   | 1.71±0.22   | 1.77±0.35   | 1.44±0.27 |
| C2_6980   | Non-lysosomal glucosylceramidase                                     | GBA2      | 0.92±0.20   | 1.05±0.26   | 1.02±0.33   | 0.72±0.17 |
| C2_183    | Non-specific cytotoxic cell receptor protein 1 homolog               | NCCRP1    | 1.84±0.23   | 0.92±0.09   | 0.73±0.13   | 1.25±0.31 |
| C2_20656  | Nuclear factor 7, ovary                                              | EEF1A1    | 0.78±0.07   | 1.21±0.10   | 1.20±0.08   | 1.06±0.21 |
| C2_1121   | Nuclear migration protein nudC                                       | NUDC      | 1.80±0.53   | 1.13±0.20   | 0.68±0.21   | 1.83±0.58 |
| C2_206    | Nucleolar protein 56                                                 | NOP56     | 31.25±19.12 | 25.67±15.84 | 17.53±16.50 | 6.93±6.61 |
| C2_27287  | Nucleolysin TIA-1 isoform p40                                        | TIA1      | 1.32±0.21   | 1.03±0.13   | 1.05±0.26   | 1.36±0.24 |
| C2_2403   | Nucleophosmin                                                        | NPM1      | 1.56±0.30   | 0.87±0.18   | 0.96±0.29   | 1.60±0.61 |
| C2_71     | Nucleoside diphosphate kinase A                                      | NME1      | 1.17±0.20   | 1.55±0.24   | 1.26±0.32   | 0.85±0.25 |
| C2_113264 | Nucleoside diphosphate kinase A1                                     | NME1-1    | 1.10±0.48   | 2.56±0.40   | 2.24±0.50   | 1.93±0.61 |
| C2_3380   | Nucleosome assembly protein 1-like 1                                 | NAP1L1    | 1.35±0.18   | 1.19±0.13   | 0.90±0.12   | 1.28±0.30 |
| C2_19448  | Nucleosome assembly protein 1-like 4                                 | NAP1L4    | 1.05±0.20   | 1.77±0.35   | 1.61±0.31   | 1.31±0.23 |
| C2_5052   | Obg-like ATPase 1                                                    | OLA1      | 0.88±0.07   | 0.60±0.09   | 1.16±0.47   | 0.94±0.24 |
| C2_5698   | OCIA domain-containing protein 2                                     | OCIAD2    | 0.72±0.10   | 0.58±0.06   | 1.29±0.39   | 1.04±0.28 |

|           |                                                                              |          |             |           |           |           |
|-----------|------------------------------------------------------------------------------|----------|-------------|-----------|-----------|-----------|
| C2_5167   | Omega-amidase NIT2                                                           | NIT2     | 1.12±0.26   | 1.14±0.16 | 0.97±0.11 | 0.76±0.19 |
| C2_20490  | Oxysterol-binding protein-related protein 9                                  | OSBPL9   | 14.19±12.45 | 1.58±0.44 | 2.49±1.02 | 1.40±0.63 |
| C2_557    | Palmitoyl-protein thioesterase 1                                             | PPT1     | 1.50±0.30   | 0.87±0.19 | 0.87±0.16 | 1.03±0.27 |
| C2_3526   | Pancreatic alpha-amylase                                                     | AMY2B    | 2.70±0.34   | 0.63±0.10 | 0.92±0.48 | 1.60±0.68 |
| C2_50293  | Parvalbumin beta 2                                                           | PRVB2    | 1.37±0.25   | 0.96±0.09 | 0.91±0.31 | 0.92±0.30 |
| C2_8807   | PDZ domain-containing protein GIPC1                                          | GIPC1    | 0.86±0.10   | 1.10±0.20 | 1.29±0.21 | 1.15±0.17 |
| C2_9030   | Pentraxin fusion protein                                                     | PXN1     | 1.23±0.48   | 1.66±0.48 | 1.03±0.40 | 0.81±0.27 |
| C2_428    | Peptidyl-prolyl cis-trans isomerase                                          | FKBP4    | 0.80±0.22   | 1.91±0.20 | 1.42±0.29 | 0.93±0.33 |
| C2_1296   | Peptidyl-prolyl cis-trans isomerase                                          | FKBP4    | 0.72±0.10   | 1.72±0.37 | 1.18±0.15 | 1.20±0.33 |
| C2_1675   | Peptidyl-prolyl cis-trans isomerase B                                        | PIIB     | 0.71±0.09   | 1.25±0.31 | 1.29±0.24 | 1.33±0.40 |
| C2_13338  | Peptidyl-prolyl cis-trans isomerase D                                        | PPID     | 2.41±0.87   | 3.32±0.94 | 1.18±0.27 | 1.95±0.46 |
| C2_8702   | Peptidyl-prolyl cis-trans isomerase FKBP1A                                   | FKBP1A   | 0.88±0.12   | 1.18±0.25 | 1.12±0.15 | 1.06±0.17 |
| C2_8872   | Peptidyl-prolyl cis-trans isomerase NIMA-interacting 1                       | PIN1     | 0.87±0.24   | 1.01±0.20 | 0.88±0.15 | 0.93±0.29 |
| C2_466    | Peroxiredoxin-1                                                              | PRDX1    | 1.39±0.23   | 1.72±0.23 | 1.69±0.22 | 1.41±0.13 |
| C2_10204  | Peroxiredoxin-2                                                              | PRDX2    | 3.41±1.21   | 3.36±0.63 | 2.57±0.61 | 2.41±0.51 |
| C2_579    | Peroxiredoxin-4                                                              | PRDX4    | 1.76±0.17   | 1.45±0.24 | 1.24±0.25 | 1.67±0.37 |
| C2_199    | Peroxiredoxin-6                                                              | PRDX6    | 1.03±0.13   | 0.95±0.10 | 1.82±0.58 | 2.18±0.78 |
| C2_8400   | Peroxisomal 2,4-dienoyl-CoA reductase                                        | DECR2    | 0.98±0.04   | 0.96±0.04 | 1.32±0.23 | 1.12±0.21 |
| C2_62152  | Peroxisomal acyl-coenzyme A oxidase 3                                        | ACOX3    | 0.48±0.14   | 1.02±0.20 | 1.89±0.39 | 1.04±0.32 |
| C2_30152  | Peroxisomal carnitine O-octanoyltransferase                                  | CROT     | 1.27±0.18   | 0.88±0.24 | 0.82±0.12 | 1.07±0.24 |
| C2_4577   | Peroxisomal multifunctional enzyme type 2                                    | HSBD17B4 | 0.86±0.10   | 0.79±0.08 | 1.24±0.22 | 1.29±0.21 |
| C2_4281   | Peroxisomal N(1)-acetyl-spermine/spermidine oxidase                          | PAOX     | 0.61±0.05   | 1.41±0.49 | 0.73±0.12 | 0.68±0.07 |
| C2_9766   | Peroxisomal sarcosine oxidase                                                | PIPOX    | 0.92±0.10   | 1.16±0.27 | 1.25±0.29 | 1.32±0.53 |
| C2_4069   | Phenazine biosynthesis-like domain-containing protein 1                      | PBLD     | 2.21±0.33   | 1.29±0.20 | 1.12±0.11 | 1.56±0.24 |
| C2_2810   | Phenylalanyl-tRNA synthetase beta chain                                      | FARSB    | 0.99±0.14   | 1.12±0.19 | 1.13±0.22 | 1.42±0.38 |
| C2_3888   | Phosphatidylcholine transfer protein                                         | PCTP     | 1.10±0.15   | 0.97±0.24 | 1.01±0.24 | 0.89±0.14 |
| C2_99     | Phosphatidylethanolamine-binding protein 1                                   | PEBP1    | 0.78±0.06   | 1.44±0.19 | 1.09±0.07 | 0.95±0.15 |
| C2_1495   | Phosphatidylinositol transfer protein alpha isoform                          | PITPNA   | 0.73±0.07   | 1.07±0.13 | 1.27±0.15 | 0.95±0.15 |
| C2_5143   | Phosphatidylinositol-4-phosphate 3-kinase C2 domain-containing subunit alpha | PIK3C2A  | 1.00±0.32   | 1.08±0.20 | 2.39±0.70 | 0.82±0.36 |
| C2_19167  | Phosphoacetylglucosamine mutase                                              | PGM3     | 0.76±0.15   | 1.23±0.29 | 0.74±0.12 | 1.04±0.18 |
| C2_12073  | Phosphoenolpyruvate carboxykinase [GTP], mitochondrial                       | PCK2     | 0.81±0.09   | 1.25±0.26 | 1.32±0.35 | 1.06±0.31 |
| C2_6725   | Phosphoglucomutase-2                                                         | PGM2     | 1.26±0.19   | 1.24±0.08 | 0.96±0.09 | 0.99±0.17 |
| C2_1379   | Phosphoglycerate kinase 1                                                    | PGK1     | 1.24±0.18   | 1.55±0.12 | 1.16±0.07 | 1.11±0.17 |
| C2_2366   | Phosphoglycerate mutase 1                                                    | PGAM1    | 0.89±0.12   | 1.26±0.21 | 0.99±0.15 | 1.04±0.17 |
| C2_40269  | Phospholipase A-2-activating protein                                         | PLAA     | 1.73±0.21   | 1.00±0.12 | 0.95±0.23 | 1.29±0.41 |
| C2_4374   | Phospholipase B-like 1                                                       | PLBD1    | 1.95±0.22   | 0.99±0.08 | 0.92±0.22 | 1.10±0.26 |
| C2_85     | Phospholipid hydroperoxide glutathione peroxidase, mitochondrial             | GPX4     | 2.01±0.44   | 1.13±0.16 | 0.84±0.17 | 1.26±0.28 |
| C2_1982   | Phosphomannomutase 2                                                         | PMM2     | 1.09±0.14   | 1.56±0.27 | 1.27±0.05 | 1.39±0.30 |
| C2_19159  | Phosphotriesterase-related protein                                           | PTER     | 1.88±0.32   | 1.02±0.17 | 0.94±0.13 | 1.39±0.29 |
| C2_31716  | Phytanoyl-CoA dioxygenase domain-containing protein 1                        | PHYHD1   | 0.80±0.05   | 0.96±0.12 | 0.95±0.18 | 1.00±0.10 |
| C2_23687  | Plasma protease C1 inhibitor                                                 | SERPING1 | 1.42±0.13   | 1.50±0.26 | 0.93±0.19 | 0.84±0.18 |
| C2_26329  | Plasma protease C1 inhibitor                                                 | SERPING1 | 1.29±0.19   | 1.34±0.27 | 0.77±0.16 | 0.87±0.16 |
| C2_4248   | Plastin-1                                                                    | PLS1     | 0.73±0.07   | 1.04±0.25 | 1.09±0.30 | 1.09±0.27 |
| C2_952    | Plastin-2                                                                    | LCP1     | 1.07±0.11   | 1.84±0.12 | 1.24±0.12 | 0.96±0.11 |
| C2_6788   | Plastin-3                                                                    | PLS3     | 1.34±0.14   | 0.85±0.08 | 1.04±0.26 | 1.12±0.27 |
| C2_5230   | Platelet glycoprotein 4                                                      | CD36     | 1.84±0.37   | 1.28±0.31 | 1.12±0.27 | 1.19±0.23 |
| C2_10639  | Platelet-activating factor acetylhydrolase                                   | PLA2G7   | 0.81±0.11   | 1.04±0.29 | 0.86±0.16 | 0.89±0.15 |
| C2_2316   | Platelet-activating factor acetylhydrolase IB subunit gamma                  | PAFAH1B3 | 0.94±0.12   | 1.13±0.05 | 0.84±0.08 | 0.93±0.17 |
| C2_21485  | Plectin                                                                      | PLEC     | 1.45±0.39   | 2.46±0.56 | 3.45±0.94 | 2.25±0.41 |
| C2_16967  | Plectin                                                                      | PLEC     | 1.04±0.08   | 1.34±0.27 | 1.65±0.39 | 1.06±0.10 |
| C3_c30637 | Plectin                                                                      | PLEC     | 1.75±0.39   | 1.99±0.33 | 1.58±0.66 | 1.64±0.30 |
| C2_11515  | Poly [ADP-ribose] polymerase 1                                               | PARP1    | 0.70±0.06   | 0.98±0.15 | 1.00±0.12 | 0.79±0.15 |
| C2_2960   | Poly(U)-binding-splicing factor PUF60                                        | PUF60    | 2.31±0.49   | 1.30±0.26 | 1.10±0.28 | 2.10±0.88 |
| C2_6459   | Poly(U)-specific endoribonuclease                                            | ENDOU    | 2.01±0.31   | 0.81±0.07 | 1.05±0.36 | 1.09±0.38 |
| C2_3168   | Polyadenylate-binding protein 1                                              | PABPC1   | 1.06±0.15   | 1.02±0.10 | 1.06±0.20 | 1.45±0.39 |
| C2_8361   | Polypyrimidine tract-binding protein 1                                       | PTBP1    | 1.06±0.13   | 1.26±0.27 | 0.94±0.14 | 1.01±0.10 |
| C2_6689   | Polyserase-2                                                                 | PRSS36   | 2.37±1.31   | 1.15±0.28 | 1.15±0.41 | 0.72±0.19 |
| C2_4566   | Porphobilinogen deaminase                                                    | HMBS     | 0.95±0.16   | 1.06±0.18 | 1.44±0.14 | 1.12±0.25 |
| C2_1110   | Prefoldin subunit 1                                                          | PFDN1    | 0.94±0.16   | 0.84±0.09 | 1.00±0.14 | 1.25±0.16 |
| C2_120921 | Prefoldin subunit 3                                                          | VBP1     | 0.96±0.15   | 1.08±0.28 | 0.82±0.23 | 1.20±0.46 |
| C2_41817  | Pregnancy zone protein                                                       | PZP      | 1.42±0.24   | 1.35±0.25 | 0.95±0.22 | 0.99±0.25 |
| C2_3804   | Pre-mRNA-processing factor 39                                                | PRPF39   | 1.26±0.35   | 1.63±0.25 | 1.41±0.20 | 1.00±0.23 |
| C2_9221   | Proactivator polypeptide                                                     | PSAPL1   | 1.43±0.30   | 1.36±0.14 | 0.91±0.21 | 1.29±0.33 |
| C2_18944  | Probable 4-hydroxy-2-oxoglutarate aldolase, mitochondrial                    | HOGA1    | 1.42±0.37   | 0.70±0.10 | 0.96±0.26 | 1.29±0.25 |
| C2_1682   | Probable aminopeptidase NPEPL1                                               | NPEPL1   | 2.12±0.34   | 1.15±0.24 | 1.14±0.18 | 1.79±0.49 |
| C2_8194   | Probable arylformamidase                                                     | AFMID    | 1.87±0.82   | 1.68±0.21 | 2.98±1.58 | 2.24±0.85 |
| C2_2903   | Probable ATP-dependent RNA helicase DDX23                                    | DDX23    | 1.09±0.36   | 1.15±0.60 | 0.40±0.11 | 2.53±1.71 |
| C2_26495  | Probable D-tyrosyl-tRNA(Tyr) deacylase 2                                     | DTD2     | 1.43±0.56   | 3.13±1.11 | 2.82±1.09 | 1.25±0.30 |
| C2_20669  | Probable peptidyl-tRNA hydrolase 2                                           | PTH2     | 1.11±0.30   | 1.45±0.25 | 1.03±0.24 | 0.99±0.25 |
| C2_1150   | Probable serine carboxypeptidase CPVL                                        | CPVL     | 2.08±0.31   | 1.03±0.16 | 0.87±0.21 | 1.97±0.72 |
| C2_11771  | Probable thiopurine S-methyltransferase                                      | TPMT     | 2.25±0.93   | 4.40±2.30 | 3.88±2.37 | 4.21±2.01 |
| C2_7946   | Profilin-2                                                                   | PFN2     | 1.90±0.23   | 1.32±0.15 | 1.16±0.15 | 1.41±0.25 |
| C2_22586  | Programmed cell death 6-interacting protein                                  | PDCCD6IP | 1.32±0.10   | 1.18±0.06 | 1.14±0.17 | 1.08±0.17 |
| C2_20093  | Programmed cell death protein 4                                              | PDCCD4   | 0.72±0.10   | 1.14±0.25 | 0.81±0.17 | 0.92±0.15 |
| C2_1796   | Prolactin regulatory element-binding protein                                 | PRFB     | 1.56±0.18   | 1.17±0.28 | 0.85±0.10 | 1.64±0.46 |
| C2_447    | Proliferation-associated protein 2G4                                         | PA2G4    | 0.70±0.09   | 0.90±0.09 | 0.96±0.10 | 0.88±0.15 |
| C2_816    | Proline synthase co-transcribed bacterial homolog protein                    | PROSC    | 0.87±0.06   | 1.32±0.21 | 1.37±0.07 | 1.08±0.16 |

|           |                                                                            |              |             |            |           |             |
|-----------|----------------------------------------------------------------------------|--------------|-------------|------------|-----------|-------------|
| C2_19946  | Prolyl endopeptidase                                                       | PREP         | 1.30±0.17   | 1.09±0.13  | 0.83±0.17 | 1.06±0.27   |
| C2_35352  | Prolyl endopeptidase                                                       | PREP         | 1.60±0.25   | 1.31±0.17  | 1.25±0.31 | 1.04±0.21   |
| C2_4229   | Prostamide/prostaglandin F synthase                                        | FAM213B      | 0.90±0.13   | 0.82±0.07  | 1.28±0.26 | 1.11±0.12   |
| C2_62037  | Proteasomal ubiquitin receptor ADRM1                                       | ADRM1        | 0.64±0.11   | 0.75±0.20  | 0.69±0.11 | 0.74±0.13   |
| C2_19056  | Proteasome activator complex subunit 1                                     | PSME1        | 1.08±0.14   | 0.79±0.04  | 1.10±0.29 | 1.31±0.27   |
| C2_52053  | Proteasome activator complex subunit 2                                     | PSME2        | 0.56±0.07   | 0.83±0.11  | 1.08±0.26 | 1.04±0.17   |
| C2_276    | Proteasome subunit alpha type-1                                            | PSMA1        | 1.80±0.30   | 1.44±0.13  | 1.71±0.17 | 1.57±0.12   |
| C2_39253  | Proteasome subunit alpha type-2                                            | PSMA2        | 2.26±0.44   | 1.55±0.27  | 1.60±0.17 | 1.48±0.15   |
| C2_667    | Proteasome subunit alpha type-3                                            | PSMA3        | 1.91±0.23   | 1.14±0.20  | 0.94±0.21 | 1.24±0.39   |
| C2_1506   | Proteasome subunit alpha type-4                                            | PSMA4        | 1.82±0.33   | 1.05±0.21  | 0.77±0.15 | 1.29±0.41   |
| C2_89     | Proteasome subunit alpha type-5                                            | PSMA5        | 1.70±0.33   | 1.20±0.17  | 1.40±0.10 | 1.34±0.25   |
| C2_979    | Proteasome subunit alpha type-6                                            | PSMA6        | 1.93±0.38   | 1.33±0.32  | 0.86±0.13 | 1.44±0.44   |
| C2_486    | Proteasome subunit alpha type-7                                            | PSMA7        | 2.25±0.37   | 1.44±0.19  | 1.47±0.30 | 1.53±0.40   |
| C2_303    | Proteasome subunit beta type-1-B                                           | PSMA1B       | 1.84±0.29   | 1.30±0.27  | 1.02±0.15 | 1.34±0.36   |
| C2_4220   | Proteasome subunit beta type-2                                             | PSMB2        | 2.23±0.45   | 1.10±0.21  | 0.88±0.13 | 1.38±0.43   |
| C2_1113   | Proteasome subunit beta type-3                                             | PSMB3        | 2.03±0.31   | 1.34±0.23  | 1.00±0.18 | 1.38±0.42   |
| C2_1989   | Proteasome subunit beta type-4                                             | PSMB4        | 2.23±0.40   | 1.39±0.29  | 1.00±0.21 | 1.75±0.59   |
| C2_2719   | Proteasome subunit beta type-5                                             | PSMB5        | 1.48±0.21   | 0.93±0.18  | 0.76±0.16 | 1.20±0.28   |
| C2_104936 | Proteasome subunit beta type-6-B like protein                              | PSMB6L-B     | 1.69±0.23   | 0.98±0.15  | 0.85±0.27 | 1.25±0.38   |
| C2_909    | Proteasome subunit beta type-7                                             | PSMB7        | 1.56±0.36   | 1.04±0.18  | 0.70±0.06 | 1.20±0.25   |
| C2_21676  | Proteasome subunit beta type-8                                             | PSMB8        | 2.05±0.25   | 1.33±0.24  | 1.06±0.15 | 1.56±0.56   |
| C2_121103 | Proteasome subunit beta type-9                                             | PSMB9        | 1.78±0.24   | 1.04±0.16  | 0.83±0.14 | 1.10±0.21   |
| C2_2075   | Protein archease                                                           | ZBTB8OS      | 0.86±0.23   | 1.24±0.34  | 0.97±0.36 | 0.41±0.11   |
| C2_3894   | Protein disulfide-isomerase                                                | P4HB         | 0.79±0.07   | 1.46±0.30  | 1.75±0.49 | 0.92±0.20   |
| C2_251    | Protein disulfide-isomerase A3                                             | PDIA3        | 0.84±0.10   | 1.32±0.29  | 1.57±0.36 | 0.97±0.16   |
| C2_2492   | Protein disulfide-isomerase A4                                             | PDIA4        | 1.11±0.10   | 1.35±0.16  | 1.73±0.30 | 1.15±0.14   |
| C2_10370  | Protein disulfide-isomerase A6                                             | PDIA6        | 0.78±0.05   | 0.97±0.06  | 1.13±0.16 | 0.98±0.10   |
| C2_229    | Protein DJ-1                                                               | PARK7        | 1.34±0.15   | 1.07±0.12  | 1.11±0.18 | 1.25±0.11   |
| C2_1216   | Protein ETHE1, mitochondrial                                               | ETHE1        | 0.90±0.24   | 1.89±0.23  | 1.88±0.54 | 1.07±0.26   |
| C2_11022  | Protein farnesyltransferase subunit beta                                   | FNTB         | 0.33±0.14   | 1.05±0.12  | 0.95±0.25 | 0.62±0.22   |
| C2_1062   | Protein farnesyltransferase/geranylgeranyltransferase type-1 subunit alpha | FNTA         | 0.90±0.06   | 0.94±0.10  | 0.78±0.11 | 0.85±0.12   |
| C2_28019  | Protein kinase C and casein kinase substrate in neurons protein 1          | PACSN1       | 0.97±0.03   | 0.98±0.16  | 0.99±0.14 | 1.30±0.15   |
| C2_24702  | Protein mago nashi homolog 2                                               | MAGOHB       | 0.83±0.15   | 1.34±0.19  | 0.90±0.15 | 0.72±0.12   |
| C2_1083   | Protein NDRG1                                                              | NDRG1        | 0.84±0.13   | 0.74±0.19  | 1.07±0.32 | 1.19±0.32   |
| C2_2272   | Protein NipSnap homolog 3A                                                 | NIPSNAP3A    | 1.35±0.14   | 1.04±0.11  | 1.28±0.15 | 0.93±0.06   |
| C2_1971   | Protein phosphatase 1 regulatory subunit 7                                 | PPP1R7       | 0.77±0.12   | 0.92±0.14  | 0.84±0.09 | 0.85±0.12   |
| C2_8910   | Protein phosphatase 1A                                                     | PPM1A        | 0.83±0.11   | 0.98±0.20  | 1.08±0.25 | 0.80±0.23   |
| C2_52239  | Protein PRRC1                                                              | PRRC1        | 1.03±0.22   | 2.11±0.48  | 1.95±0.33 | 1.30±0.44   |
| C2_1280   | Protein S100-A10                                                           | S100A10      | 0.58±0.15   | 2.67±1.30  | 1.46±0.64 | 0.72±0.26   |
| C2_8005   | Protein SET                                                                | SET          | 1.49±0.12   | 1.56±0.21  | 1.34±0.18 | 1.33±0.14   |
| C2_7030   | Protein transport protein Sec24A                                           | SEC24A       | 0.79±0.10   | 1.11±0.24  | 1.36±0.27 | 1.17±0.29   |
| C2_324    | Protein transport protein Sec61 subunit alpha-like 1                       | SEC61A1      | 0.46±0.11   | 0.80±0.20  | 0.99±0.33 | 0.95±0.24   |
| C2_6352   | Protein Z-dependent protease inhibitor                                     | SERPINA10    | 1.78±0.22   | 1.70±0.18  | 1.40±0.17 | 1.37±0.24   |
| C2_13589  | Protein-arginine deiminase type-2                                          | PADI2        | 0.79±0.21   | 1.56±0.36  | 1.49±0.26 | 1.05±0.12   |
| C2_31468  | Prothrombin                                                                | F2           | 0.68±0.09   | 0.89±0.14  | 0.67±0.06 | 0.90±0.16   |
| C2_16527  | Prothrombin                                                                | F2           | 1.11±0.20   | 1.57±0.38  | 1.13±0.17 | 1.26±0.19   |
| C2_13732  | Protocadherin-like wing polarity protein stan                              | STAN         | 1.87±0.26   | 1.28±0.16  | 1.12±0.22 | 1.27±0.19   |
| C2_7122   | Pseudouridine-5'-monophosphatase                                           | HDHD1        | 0.70±0.10   | 1.17±0.16  | 1.04±0.12 | 0.83±0.10   |
| C2_21104  | Puromycin-sensitive aminopeptidase                                         | NPEPPS       | 1.74±0.28   | 1.11±0.18  | 0.93±0.12 | 1.50±0.34   |
| C2_23472  | Putative acyl-CoA dehydrogenase AidB                                       | AIDB         | 0.89±0.19   | 0.91±0.17  | 1.37±0.33 | 1.18±0.32   |
| C2_3029   | Putative all-trans-retinol 13,14-reductase                                 | RETSAT       | 0.93±0.06   | 0.88±0.10  | 1.28±0.18 | 1.31±0.22   |
| C2_95323  | Putative alpha-L-fucosidase                                                | FUCA2        | 1.69±0.22   | 1.28±0.18  | 1.07±0.46 | 1.73±0.49   |
| C2_962    | Putative aminopeptidase W07G4.4                                            | W07G4.4      | 3.01±0.65   | 1.88±0.32  | 1.67±0.30 | 2.18±0.36   |
| C2_980    | Putative deoxyribose-phosphate aldolase                                    | DERA         | 1.01±0.23   | 0.69±0.05  | 0.71±0.06 | 0.81±0.07   |
| C2_721    | Putative hydroxypyruvate isomerase                                         | HYI          | 32.78±19.89 | 11.06±9.63 | 7.97±6.79 | 28.15±17.63 |
| C2_4760   | Putative L-aspartate dehydrogenase                                         | ASPDH        | 1.41±0.11   | 1.24±0.17  | 1.13±0.10 | 1.06±0.15   |
| C2_37616  | Putative leucine-rich repeat-containing protein DDB_G0290503               | DDB_G0290503 | 1.24±0.22   | 0.88±0.11  | 0.78±0.19 | 1.17±0.42   |
| C2_1758   | Putative methyltransferase DDB_G0268948                                    | DDB_G0268948 | 0.67±0.11   | 1.03±0.15  | 1.00±0.09 | 1.07±0.14   |
| C2_586    | Putative phospholipase B-like 2                                            | PLBD2        | 1.97±0.39   | 0.85±0.08  | 0.68±0.10 | 1.43±0.41   |
| C2_2726   | Putative serine protease K12H4.7                                           | K12H4.7      | 1.94±0.28   | 0.94±0.18  | 0.53±0.11 | 1.13±0.37   |
| C2_8233   | Pyridoxal kinase                                                           | PDXK         | 2.18±0.41   | 1.62±0.28  | 1.14±0.13 | 1.50±0.26   |
| C2_4524   | Pyridoxine-5'-phosphate oxidase                                            | PNPO         | 0.91±0.13   | 1.72±0.41  | 1.58±0.32 | 1.22±0.31   |
| C2_2476   | Pyroglutamyl-peptidase 1                                                   | PGPEP1       | 2.85±1.57   | 1.37±0.26  | 0.94±0.23 | 1.35±0.40   |
| C2_2277   | Pyruvate dehydrogenase E1 component subunit beta, mitochondrial            | PDHB         | 1.02±0.19   | 0.98±0.17  | 1.12±0.22 | 1.15±0.20   |
| C2_13692  | Pyruvate kinase isozyme M1                                                 | PKM          | 1.55±0.28   | 0.97±0.13  | 0.92±0.17 | 1.58±0.26   |
| C2_110881 | Pyruvate kinase isozymes M1/M2                                             | PKM12        | 0.59±0.11   | 1.59±0.28  | 1.19±0.24 | 1.15±0.38   |
| C2_96589  | Pyruvate kinase isozymes M1/M2                                             | PKM12        | 0.61±0.11   | 1.09±0.11  | 1.09±0.19 | 0.78±0.21   |
| C2_7049   | Pyruvate kinase isozymes R/L                                               | PKRL         | 0.53±0.09   | 1.19±0.26  | 0.90±0.22 | 0.88±0.17   |
| C2_2874   | Pyruvate kinase muscle isozyme                                             | PKM1         | 0.74±0.07   | 1.30±0.13  | 1.46±0.28 | 1.27±0.30   |
| C2_1390   | Quinone oxidoreductase                                                     | CRYZ         | 1.08±0.21   | 1.52±0.32  | 1.35±0.31 | 1.17±0.23   |
| C2_32560  | Rab GDP dissociation inhibitor alpha                                       | GDI1         | 0.98±0.08   | 1.15±0.09  | 0.84±0.08 | 0.93±0.06   |
| C2_455    | Rab GDP dissociation inhibitor beta                                        | GDI2         | 0.89±0.12   | 1.35±0.11  | 1.01±0.08 | 0.98±0.15   |
| C2_32535  | RalBP1-associated Eps domain-containing protein 1                          | REP51        | 1.63±0.12   | 0.75±0.05  | 0.67±0.15 | 0.97±0.17   |
| C2_35658  | Ras GTPase-activating protein-binding protein 2                            | G3BP2        | 1.08±0.15   | 1.28±0.12  | 1.25±0.09 | 0.92±0.23   |
| C2_7014   | Ras GTPase-activating-like protein IQGAP2                                  | IQGAP2       | 8.76±6.59   | 1.96±0.49  | 2.24±0.69 | 2.91±0.93   |

|           |                                                                                  |          |           |           |            |           |
|-----------|----------------------------------------------------------------------------------|----------|-----------|-----------|------------|-----------|
| C2_1097   | Ras-related C3 botulinum toxin substrate 1                                       | RAC1     | 1.46±0.09 | 1.29±0.16 | 1.33±0.31  | 1.83±0.36 |
| C2_2067   | Ras-related protein Rab-11B                                                      | RAB11B   | 1.09±0.06 | 0.99±0.08 | 1.32±0.15  | 1.32±0.28 |
| C2_10036  | Ras-related protein Rab-14                                                       | RAB14    | 1.09±0.18 | 0.97±0.03 | 1.19±0.10  | 1.30±0.11 |
| C2_7624   | Ras-related protein Rab-1A                                                       | RAB1A    | 1.12±0.07 | 1.27±0.07 | 1.20±0.07  | 1.04±0.09 |
| C2_67687  | Ras-related protein Rab-1B                                                       | RAB1B    | 1.70±0.51 | 2.29±0.44 | 3.36±0.59  | 2.53±0.80 |
| C2_1465   | Ras-related protein Rab-2A                                                       | RAB2A    | 0.89±0.09 | 1.03±0.11 | 0.91±0.06  | 0.90±0.08 |
| C2_7828   | Ras-related protein Rab-5C                                                       | RAB5C    | 1.63±0.60 | 1.02±0.09 | 1.28±0.17  | 1.08±0.16 |
| C2_7252   | Ras-related protein Rab-7a                                                       | RAB7A    | 1.02±0.07 | 1.19±0.10 | 1.35±0.18  | 1.07±0.10 |
| C2_935    | Ras-related protein Rab-B                                                        | RALB     | 1.37±0.21 | 1.49±0.32 | 1.29±0.36  | 1.34±0.21 |
| C2_879    | Ras-related protein Rap-1b                                                       | RAP1B    | 1.61±0.26 | 1.81±0.33 | 1.56±0.27  | 1.16±0.18 |
| C2_1650   | Receptor expression-enhancing protein 5                                          | REEP5    | 0.75±0.23 | 1.31±0.28 | 0.79±0.21  | 0.62±0.21 |
| C2_1647   | Regucalcin                                                                       | RGN      | 2.02±0.37 | 1.11±0.16 | 0.86±0.15  | 1.36±0.31 |
| C2_2457   | Regulator of microtubule dynamics protein 1                                      | RMDN1    | 0.99±0.35 | 1.54±0.42 | 1.63±0.33  | 1.04±0.26 |
| C2_12838  | Renalase                                                                         | RNL5     | 0.96±0.08 | 1.36±0.13 | 1.11±0.20  | 0.99±0.11 |
| C2_933    | Retinal dehydrogenase 2                                                          | ALDH1A2  | 2.27±0.36 | 1.48±0.19 | 1.18±0.10  | 1.45±0.20 |
| C2_9252   | Retinol dehydrogenase 3                                                          | RDH3     | 0.99±0.28 | 1.31±0.25 | 1.87±0.54  | 2.04±0.88 |
| C2_41464  | Retinol dehydrogenase 7                                                          | RDH7     | 1.08±0.14 | 1.43±0.77 | 1.91±0.56  | 1.09±0.10 |
| C2_11901  | Retinol-binding protein 2                                                        | RBP2     | 0.57±0.06 | 1.75±0.34 | 1.20±0.26  | 1.27±0.36 |
| C2_241    | Rho GDP-dissociation inhibitor 1                                                 | ARHGDI1  | 0.75±0.15 | 1.88±0.12 | 1.42±0.27  | 0.96±0.22 |
| C2_30696  | Rho GTPase-activating protein 1                                                  | ARHGAP1  | 0.79±0.26 | 1.79±0.71 | 1.02±0.33  | 1.31±0.56 |
| C2_2718   | Ribokinase                                                                       | RBKS     | 1.96±0.44 | 1.23±0.11 | 0.80±0.16  | 1.07±0.20 |
| C2_8404   | Ribonuclease UK114                                                               | HRSP12   | 2.01±0.46 | 1.61±0.21 | 2.16±0.37  | 1.75±0.18 |
| C2_28116  | Ribose-5-phosphate isomerase                                                     | RPIA     | 1.31±0.17 | 1.26±0.21 | 1.23±0.17  | 1.40±0.30 |
| C2_1415   | Ribose-phosphate pyrophosphokinase 1                                             | PRPS1    | 1.21±0.27 | 1.07±0.27 | 1.17±0.30  | 1.46±0.26 |
| C2_2840   | Ribosomal protein S6 kinase 2 alpha                                              | RP56KA2  | 0.82±0.08 | 0.89±0.07 | 0.90±0.15  | 0.93±0.13 |
| C3_c19359 | Ribosylidihydroxynicotinamide dehydrogenase [quinone]                            | NQO2     | 1.41±0.20 | 1.73±0.27 | 1.12±0.21  | 1.18±0.25 |
| C2_6486   | RNA-binding protein 47                                                           | RBM47    | 0.97±0.11 | 1.25±0.25 | 1.01±0.15  | 1.14±0.15 |
| C2_972    | S-adenosylmethionine synthase isoform type-2                                     | MAT2A    | 0.68±0.17 | 0.70±0.15 | 1.10±0.40  | 1.69±0.56 |
| C2_1565   | Scavenger mRNA-decapping enzyme DcpS                                             | DCPS     | 0.88±0.26 | 1.90±0.57 | 1.24±0.17  | 1.03±0.50 |
| C2_13518  | Scavenger receptor class B member 1                                              | SCARB1   | 1.26±0.17 | 1.09±0.22 | 1.06±0.16  | 1.25±0.36 |
| C2_19513  | Selenide, water dikinase 1                                                       | SEPHS1   | 1.66±0.16 | 2.00±0.31 | 2.88±0.56  | 1.52±0.29 |
| C2_6263   | Selenide, water dikinase 2                                                       | SEPHS2   | 1.43±0.13 | 1.36±0.09 | 1.35±0.10  | 1.06±0.08 |
| C2_4668   | Selenium-binding protein 1                                                       | SELENBP1 | 1.50±0.15 | 1.87±0.15 | 1.91±0.25  | 1.86±0.16 |
| C2_5603   | Septin-2                                                                         | SEPT2    | 1.02±0.06 | 1.21±0.17 | 1.03±0.15  | 1.07±0.08 |
| C2_22270  | Septin-6                                                                         | SEPT6    | 0.82±0.14 | 0.92±0.10 | 0.90±0.17  | 1.00±0.13 |
| C2_8875   | Septin-7                                                                         | SEPT7    | 1.56±0.35 | 1.37±0.15 | 2.63±0.56  | 1.52±0.28 |
| C2_1375   | Serine hydroxymethyltransferase, cytosolic                                       | SHMT1    | 1.68±0.23 | 1.56±0.16 | 1.60±0.22  | 1.30±0.05 |
| C2_8391   | Serine/threonine-protein kinase 24                                               | STK24    | 1.33±0.47 | 2.75±1.33 | 1.96±0.98  | 2.84±1.12 |
| C2_7698   | Serine/threonine-protein phosphatase 2A 65 kDa regulatory subunit A beta isoform | PPP2R1B  | 0.75±0.11 | 0.76±0.14 | 1.06±0.30  | 1.09±0.20 |
| C2_11251  | Serine/threonine-protein phosphatase 2A catalytic subunit alpha isoform          | PPP2CA   | 1.87±0.64 | 0.96±0.09 | 0.72±0.14  | 1.12±0.32 |
| C2_22338  | Serine/threonine-protein phosphatase 2B catalytic subunit alpha isoform          | PPP3CA   | 1.98±0.24 | 1.46±0.12 | 1.28±0.26  | 1.47±0.31 |
| C2_7354   | Serine/threonine-protein phosphatase 5                                           | PPP5C    | 1.36±0.10 | 1.09±0.19 | 0.98±0.13  | 1.15±0.22 |
| C2_2436   | Serine/threonine-protein phosphatase 6 catalytic subunit                         | PPP6C    | 0.92±0.11 | 1.07±0.14 | 0.87±0.24  | 0.50±0.15 |
| C2_553    | Serine/threonine-protein phosphatase PP1-gamma catalytic subunit                 | Ppp1cc   | 1.45±0.12 | 0.85±0.19 | 0.80±0.16  | 1.09±0.21 |
| C2_7158   | Serotransferrin                                                                  | TF       | 1.27±0.22 | 1.74±0.34 | 1.42±0.39  | 1.36±0.39 |
| C2_112963 | Serpin B6                                                                        | SERPINB6 | 0.91±0.16 | 1.17±0.39 | 1.74±0.79  | 0.82±0.27 |
| C2_110965 | Serpin B8                                                                        | SERPINB8 | 2.81±0.37 | 2.10±0.30 | 1.62±0.15  | 2.07±0.39 |
| C2_14608  | Serum amyloid P-component                                                        | APCS     | 0.89±0.25 | 1.08±0.10 | 1.95±0.68  | 1.51±0.48 |
| C2_7237   | Seryl-tRNA synthetase, cytoplasmic                                               | SARS     | 0.83±0.11 | 0.61±0.09 | 1.06±0.30  | 1.11±0.35 |
| C2_5020   | Sex hormone-binding globulin                                                     | SHBG     | 0.79±0.23 | 0.99±0.07 | 1.10±0.10  | 1.00±0.17 |
| C2_778    | S-formylglutathione hydrolase                                                    | ESD      | 1.49±0.12 | 1.32±0.20 | 0.89±0.07  | 1.49±0.37 |
| C2_122    | SH3 domain-binding glutamic acid-rich-like protein                               | SH3BGRL  | 1.07±0.07 | 1.46±0.20 | 1.09±0.09  | 1.16±0.13 |
| C2_107681 | SH3 domain-binding glutamic acid-rich-like protein 3                             | SH3BGRL3 | 1.60±0.96 | 3.03±1.09 | 10.53±4.24 | 4.20±1.75 |
| C2_2197   | Sialic acid synthase                                                             | HANS     | 0.82±0.13 | 1.21±0.30 | 1.58±0.38  | 1.23±0.21 |
| C2_1438   | Sialidase-1                                                                      | NEU1     | 1.76±0.29 | 0.82±0.10 | 0.78±0.10  | 1.26±0.39 |
| C2_2871   | Signal transducer and activator of transcription 3                               | STAT3    | 0.91±0.10 | 0.97±0.14 | 0.88±0.16  | 0.90±0.09 |
| C2_4819   | Small nuclear ribonucleoprotein E                                                | SNRPE    | 1.16±0.17 | 1.13±0.06 | 1.12±0.24  | 1.07±0.24 |
| C2_68502  | Small nuclear ribonucleoprotein Sm D1                                            | SNRPD1   | 1.73±0.42 | 1.75±0.30 | 1.42±0.16  | 1.19±0.17 |
| C2_7038   | Small nuclear ribonucleoprotein Sm D3                                            | SNRPD3   | 2.20±0.49 | 1.68±0.17 | 1.41±0.26  | 1.24±0.27 |
| C2_1659   | Sodium-dependent neutral amino acid transporter B(0)AT3                          | SLC6A18  | 1.85±0.42 | 2.40±1.06 | 2.02±0.63  | 2.71±1.01 |
| C2_1290   | Sorbitol dehydrogenase                                                           | SORD     | 1.67±0.21 | 1.14±0.09 | 0.87±0.10  | 1.17±0.17 |
| C2_408    | Sorcin                                                                           | SRI      | 1.03±0.23 | 1.12±0.11 | 1.03±0.10  | 1.05±0.21 |
| C2_2983   | Sorting nexin-1                                                                  | SNX1     | 1.05±0.07 | 0.94±0.05 | 0.99±0.16  | 1.11±0.10 |
| C2_3908   | Sorting nexin-4                                                                  | SNX4     | 0.91±0.16 | 1.16±0.15 | 1.23±0.22  | 1.37±0.33 |
| C2_1441   | Sorting nexin-5                                                                  | SNX5     | 1.00±0.22 | 0.93±0.09 | 1.36±0.26  | 1.09±0.14 |
| C2_10159  | Sorting nexin-8                                                                  | SNX8     | 0.84±0.11 | 0.97±0.07 | 1.10±0.15  | 0.92±0.10 |
| C2_2143   | Sorting nexin-9                                                                  | SNX9     | 1.12±0.17 | 0.89±0.10 | 0.97±0.19  | 1.01±0.09 |
| C2_963    | Spectrin alpha chain, brain                                                      | SPTAN1   | 0.72±0.09 | 1.15±0.14 | 1.02±0.07  | 1.02±0.23 |
| C2_46348  | Spectrin alpha chain, brain                                                      | SPTAN1   | 0.43±0.11 | 0.98±0.31 | 1.01±0.15  | 0.99±0.31 |
| C2_84720  | Spectrin alpha chain, brain                                                      | SPTAN1   | 0.58±0.15 | 0.88±0.13 | 0.98±0.11  | 0.78±0.24 |
| C2_46691  | Spectrin alpha chain, brain                                                      | SPTAN1   | 0.62±0.14 | 0.94±0.24 | 0.85±0.24  | 0.99±0.22 |
| C2_4387   | Sphingosine-1-phosphate lyase 1                                                  | SGPL1    | 1.11±0.22 | 0.77±0.06 | 1.40±0.19  | 1.10±0.15 |
| C2_7011   | Spliceosome RNA helicase DDX39B homolog                                          | DDX39B   | 1.03±0.10 | 1.31±0.20 | 1.66±0.36  | 1.10±0.26 |
| C3_c39473 | Splicing factor 3B subunit 4                                                     | SF3B4    | 2.37±1.09 | 1.67±0.32 | 1.75±0.50  | 1.17±0.20 |
| C2_7753   | Splicing factor U2AF 65 kDa subunit                                              | U2AF2    | 1.24±0.24 | 1.38±0.24 | 0.90±0.16  | 1.22±0.27 |

|           |                                                                          |               |           |           |           |           |
|-----------|--------------------------------------------------------------------------|---------------|-----------|-----------|-----------|-----------|
| C2_1302   | Staphylococcal nuclease domain-containing protein 1                      | SND1          | 1.11±0.14 | 1.04±0.17 | 1.04±0.14 | 1.06±0.12 |
| C2_8732   | Stress-induced-phosphoprotein 1                                          | STP1          | 1.17±0.18 | 1.08±0.21 | 0.87±0.21 | 1.01±0.13 |
| C2_1571   | Succinate dehydrogenase [ubiquinone] flavoprotein subunit, mitochondrial | SDHA          | 1.29±0.23 | 1.07±0.26 | 1.32±0.36 | 1.36±0.41 |
| C2_11441  | Succinyl-CoA ligase [GDP-forming] subunit beta, mitochondrial            | SUCLG2        | 0.80±0.13 | 0.68±0.22 | 1.10±0.38 | 1.18±0.39 |
| C2_10991  | Sucrase-isomaltase, intestinal                                           | SI            | 2.13±0.32 | 1.18±0.19 | 1.23±0.26 | 1.83±0.76 |
| C2_1085   | Sulfotransferase 1C1                                                     | SULT1C3       | 0.71±0.06 | 0.74±0.05 | 1.07±0.33 | 1.02±0.27 |
| C2_3986   | Sulfotransferase 1C2                                                     | SULT1C2       | 1.08±0.29 | 1.15±0.21 | 1.69±0.33 | 2.30±0.75 |
| C2_7228   | Sulfotransferase 6B1                                                     | SULT6B1       | 0.96±0.17 | 1.08±0.21 | 1.15±0.38 | 1.64±0.44 |
| C2_8495   | Sulfotransferase family cytosolic 2B member 1                            | SULT2B1       | 0.50±0.07 | 0.59±0.12 | 0.73±0.15 | 0.58±0.09 |
| C2_368    | Superoxide dismutase [Cu-Zn]                                             | SOD1          | 2.83±0.54 | 1.47±0.29 | 0.96±0.24 | 2.24±0.61 |
| C2_1642   | Superoxide dismutase [Mn], mitochondrial                                 | SOD2          | 1.54±0.22 | 0.91±0.10 | 1.17±0.20 | 1.21±0.24 |
| C2_4089   | Sushi domain-containing protein 2                                        | SUSD2         | 1.79±0.27 | 0.93±0.10 | 0.92±0.21 | 1.19±0.29 |
| C2_31339  | Synaptic vesicle membrane protein VAT-1 homolog                          | VAT1          | 1.31±0.27 | 1.30±0.19 | 1.05±0.15 | 1.05±0.16 |
| C2_3925   | Synaptophysin-like protein 1                                             | SYPL1         | 1.26±0.12 | 0.80±0.24 | 1.21±0.38 | 1.39±0.44 |
| C2_83924  | Talin-1                                                                  | TLN1          | 0.68±0.17 | 2.71±1.04 | 1.35±0.34 | 1.53±0.58 |
| C2_76944  | Talin-1                                                                  | TLN1          | 1.12±0.21 | 1.26±0.15 | 1.51±0.35 | 1.82±0.33 |
| C2_15378  | Talin-1                                                                  | TLN1          | 1.19±0.14 | 0.98±0.07 | 1.01±0.15 | 1.04±0.07 |
| C2_41984  | Talin-2                                                                  | TLN2          | 1.09±0.10 | 1.06±0.09 | 0.81±0.17 | 1.03±0.10 |
| C2_4568   | TAR DNA-binding protein 43                                               | TARDBP        | 0.48±0.16 | 1.82±0.55 | 0.92±0.27 | 1.14±0.25 |
| C2_8321   | Target of Myb protein 1                                                  | TOM1          | 1.37±0.18 | 1.71±0.32 | 2.05±0.23 | 1.46±0.21 |
| C2_298    | T-complex protein 1 subunit epsilon                                      | CCT5          | 0.85±0.14 | 0.99±0.13 | 1.42±0.31 | 1.20±0.19 |
| C2_1691   | T-complex protein 1 subunit eta                                          | CCT7          | 0.95±0.08 | 0.75±0.13 | 1.24±0.27 | 1.10±0.12 |
| C2_1250   | T-complex protein 1 subunit gamma                                        | CCT3          | 1.00±0.07 | 0.79±0.14 | 1.04±0.24 | 1.05±0.17 |
| C2_3533   | T-complex protein 1 subunit zeta                                         | CCT6A         | 1.13±0.24 | 0.77±0.07 | 1.06±0.20 | 1.19±0.27 |
| C2_2347   | Tetratricopeptide repeat protein 38                                      | TTC38         | 0.99±0.22 | 1.83±0.14 | 1.12±0.13 | 1.00±0.21 |
| C2_7496   | Thiamin pyrophosphokinase 1                                              | TPK1          | 1.26±0.17 | 1.17±0.17 | 0.90±0.19 | 0.85±0.08 |
| C2_15542  | Thimet oligopeptidase                                                    | THOP1         | 1.67±0.13 | 1.06±0.15 | 1.04±0.24 | 1.29±0.28 |
| C2_71169  | Thimet oligopeptidase                                                    | THOP1         | 1.57±0.17 | 0.91±0.16 | 0.95±0.24 | 1.31±0.31 |
| C2_1158   | Thioredoxin                                                              | TXN           | 0.45±0.07 | 1.46±0.44 | 1.36±0.35 | 1.29±0.44 |
| C2_5341   | Thioredoxin domain-containing protein 5                                  | TXNDC5        | 0.67±0.18 | 0.86±0.24 | 1.39±0.38 | 0.89±0.23 |
| C2_1093   | Thioredoxin reductase 3                                                  | TXNRD3        | 1.92±0.29 | 1.40±0.16 | 1.22±0.11 | 1.28±0.15 |
| C2_1183   | Thioredoxin-like protein 1                                               | TXNL1         | 1.89±0.27 | 1.50±0.27 | 1.12±0.16 | 1.16±0.22 |
| C2_13380  | Thiosulfate sulfurtransferase/rhodanese-like domain-containing protein 1 | TSTD1         | 0.75±0.10 | 2.07±0.80 | 1.89±0.91 | 1.25±0.35 |
| C2_7672   | Threonine synthase-like 2                                                | THNSL2        | 0.84±0.07 | 0.76±0.09 | 0.97±0.16 | 0.95±0.08 |
| C2_3045   | Threonyl-tRNA synthetase, cytoplasmic                                    | TARS          | 0.77±0.12 | 1.27±0.13 | 1.00±0.13 | 0.88±0.21 |
| C2_1974   | Toll-interacting protein                                                 | TOLLIP        | 0.76±0.11 | 1.15±0.07 | 0.94±0.06 | 1.01±0.09 |
| C2_18467  | Trans-1,2-dihydrobenzene-1,2-diol dehydrogenase                          | DHDH          | 0.89±0.08 | 0.98±0.21 | 1.07±0.13 | 1.10±0.14 |
| C2_564    | Transaldolase                                                            | TALDO1        | 0.68±0.08 | 1.76±0.29 | 1.31±0.14 | 1.09±0.31 |
| C2_3567   | Transferrin receptor protein 1                                           | TFRC          | 1.13±0.17 | 0.86±0.13 | 1.27±0.30 | 1.29±0.11 |
| C2_4791   | Transgelin                                                               | TAGLN         | 1.04±0.12 | 1.77±0.55 | 0.93±0.24 | 0.92±0.06 |
| C2_15562  | Transitional endoplasmic reticulum ATPase                                | VCP           | 1.04±0.13 | 1.22±0.25 | 2.03±0.57 | 1.68±0.43 |
| C3_c25177 | Transitional endoplasmic reticulum ATPase                                | VCP           | 0.67±0.13 | 0.75±0.22 | 1.40±0.46 | 0.96±0.27 |
| C3_c6442  | Transketolase                                                            | TKT           | 2.05±0.50 | 1.41±0.17 | 1.10±0.17 | 1.57±0.28 |
| C2_824    | Transketolase-like protein 2                                             | TKTL2         | 1.76±0.33 | 1.22±0.23 | 1.18±0.24 | 1.23±0.18 |
| C2_15     | Translationally-controlled tumor protein homolog                         | TPT1          | 1.41±0.22 | 1.17±0.16 | 0.91±0.19 | 1.54±0.35 |
| C2_23686  | Translin                                                                 | TSN           | 1.95±0.33 | 1.50±0.24 | 1.34±0.16 | 1.52±0.35 |
| C2_5754   | Trehalase                                                                | TREH          | 2.04±0.42 | 1.04±0.27 | 0.89±0.36 | 0.74±0.13 |
| C2_10341  | Tricarboxylate transport protein, mitochondrial                          | Slc25a1       | 0.84±0.12 | 0.77±0.21 | 1.67±0.66 | 0.70±0.08 |
| C2_2435   | Trifunctional enzyme subunit beta, mitochondrial                         | HADHB         | 0.84±0.19 | 0.66±0.21 | 0.82±0.35 | 1.09±0.30 |
| C2_52     | Triosephosphate isomerase B                                              | TPI1          | 1.53±0.33 | 1.80±0.18 | 1.32±0.10 | 1.44±0.24 |
| C2_26986  | tRNA (adenine-N(1)-)-methyltransferase non-catalytic subunit TRM6        | TRMT6         | 0.74±0.04 | 0.99±0.30 | 0.88±0.16 | 0.81±0.13 |
| C2_1213   | Trypsin                                                                  | 2210010C04Rik | 3.57±0.67 | 0.48±0.11 | 0.67±0.49 | 2.31±0.96 |
| C2_84054  | Trypsin-1                                                                | PRSS1         | 3.25±0.79 | 0.62±0.10 | 0.68±0.39 | 1.43±0.52 |
| C2_121419 | Trypsin-2                                                                | PRSS2         | 1.49±0.32 | 0.61±0.05 | 0.48±0.14 | 1.15±0.38 |
| C2_4459   | Trypsin-3                                                                | PRSS3         | 1.95±0.26 | 0.93±0.14 | 1.18±0.36 | 1.04±0.31 |
| C2_38179  | Tubulin alpha-1A chain                                                   | TUBA1A        | 1.11±0.14 | 0.94±0.05 | 1.38±0.42 | 1.33±0.24 |
| C2_7711   | Tubulin alpha-1B chain                                                   | TUBA1B        | 0.86±0.12 | 1.02±0.11 | 1.26±0.12 | 1.28±0.23 |
| C2_905    | Tubulin beta chain                                                       | TUBB          | 0.41±0.08 | 0.51±0.06 | 1.64±0.79 | 0.82±0.37 |
| C2_14202  | Tubulin beta-2C chain                                                    | TUBB4B        | 0.89±0.12 | 0.91±0.08 | 1.11±0.25 | 1.41±0.34 |
| C2_2978   | Tubulin-folding cofactor B                                               | TBCB          | 1.01±0.21 | 1.62±0.26 | 1.57±0.36 | 1.69±0.25 |
| C2_2326   | Tumor necrosis factor receptor type 1-associated DEATH domain protein    | TRADD         | 1.13±0.25 | 1.15±0.26 | 2.15±0.81 | 1.39±0.17 |
| C2_6726   | Tumor susceptibility gene 101 protein                                    | TSG101        | 0.99±0.17 | 1.00±0.18 | 0.75±0.06 | 1.03±0.07 |
| C2_877    | Tumor-associated calcium signal transducer 2                             | TACSTD2       | 1.38±0.16 | 1.28±0.21 | 1.63±0.34 | 1.48±0.38 |
| C2_6143   | Twinfilin-1                                                              | TWF1          | 0.73±0.17 | 1.01±0.13 | 1.12±0.21 | 0.89±0.12 |
| C2_12783  | Type-4 ice-structuring protein LS-12                                     | AFP4          | 0.46±0.04 | 0.29±0.05 | 2.59±1.47 | 1.83±1.13 |
| C2_2163   | Tyrosine-protein kinase CSK                                              | CSK           | 1.30±0.14 | 1.22±0.22 | 0.80±0.17 | 0.97±0.12 |
| C2_16846  | Tyrosine-protein phosphatase non-receptor type 11                        | PTPN11        | 1.11±0.16 | 0.70±0.07 | 0.78±0.04 | 0.79±0.11 |
| C2_26124  | U6 snRNA-associated Sm-like protein LSM3                                 | LSM3          | 1.17±0.19 | 1.02±0.14 | 0.99±0.15 | 1.01±0.15 |
| C2_4328   | U6 snRNA-associated Sm-like protein LSM4                                 | LSM4          | 1.48±0.35 | 2.17±0.39 | 2.50±0.40 | 1.38±0.37 |
| C2_2288   | Ubiquitin-2                                                              | UBQLN2        | 1.00±0.06 | 1.10±0.05 | 1.03±0.09 | 1.11±0.16 |
| C2_1964   | Ubiquitin carboxyl-terminal hydrolase 14                                 | USP14         | 1.00±0.12 | 0.94±0.06 | 1.33±0.20 | 1.30±0.13 |
| C2_107070 | Ubiquitin carboxyl-terminal hydrolase 21                                 | USP21         | 1.48±0.74 | 2.50±0.63 | 2.27±0.46 | 1.85±0.68 |
| C2_18831  | Ubiquitin carboxyl-terminal hydrolase 7                                  | USP7          | 1.43±0.13 | 1.34±0.14 | 1.26±0.22 | 1.13±0.16 |
| C2_660    | Ubiquitin carboxyl-terminal hydrolase isozyme L3                         | UCHL3         | 0.87±0.08 | 1.14±0.17 | 1.26±0.29 | 1.21±0.26 |

|           |                                                                |             |             |             |             |             |
|-----------|----------------------------------------------------------------|-------------|-------------|-------------|-------------|-------------|
| C2_470    | Ubiquitin fusion degradation protein 1 homolog                 | UFD1L       | 1.64±0.17   | 1.06±0.10   | 0.95±0.08   | 1.20±0.22   |
| C2_155    | Ubiquitin thioesterase OTUB1                                   | Otub1       | 0.70±0.12   | 0.91±0.16   | 0.96±0.21   | 0.85±0.10   |
| C2_33738  | Ubiquitin-40S ribosomal protein S27a                           | RPS27A      | 2.02±0.39   | 0.93±0.24   | 0.82±0.33   | 1.68±0.55   |
| C2_5227   | Ubiquitin-conjugating enzyme E2 D2                             | UBE2D2      | 0.71±0.11   | 1.17±0.09   | 0.75±0.14   | 0.81±0.12   |
| C2_6947   | Ubiquitin-conjugating enzyme E2 L3                             | UBE2L3      | 0.96±0.17   | 1.47±0.32   | 1.29±0.33   | 1.43±0.41   |
| C2_17030  | Ubiquitin-conjugating enzyme E2 N                              | UBE2N       | 0.85±0.07   | 0.90±0.06   | 1.27±0.34   | 1.08±0.16   |
| C2_8231   | Ubiquitin-like modifier-activating enzyme 1                    | UBA1        | 0.77±0.07   | 0.94±0.16   | 0.96±0.19   | 1.01±0.13   |
| C2_6707   | Ubiquitin-like modifier-activating enzyme ATG7                 | ATG7        | 1.31±0.38   | 0.98±0.12   | 1.02±0.08   | 0.82±0.10   |
| C2_29802  | Ubiquitin-like protein FUB1                                    | FAU         | 0.88±0.12   | 0.88±0.16   | 2.22±0.73   | 2.27±1.11   |
| C2_5019   | Ubiquitin-like-conjugating enzyme ATG3                         | ATG3        | 1.38±0.26   | 0.98±0.10   | 1.52±0.27   | 1.64±0.16   |
| C2_13734  | UBX domain-containing protein 1                                | UBXN1       | 1.04±0.26   | 1.42±0.39   | 1.37±0.31   | 1.08±0.26   |
| C2_7714   | UDP-glucose 4-epimerase                                        | GALE        | 1.11±0.11   | 1.18±0.24   | 1.22±0.22   | 1.23±0.12   |
| C2_11633  | UDP-glucose 6-dehydrogenase                                    | UGDH        | 0.63±0.06   | 1.32±0.30   | 2.16±0.64   | 1.52±0.38   |
| C2_3599   | UDP-glucuronosyltransferase                                    | UGT1A1      | 1.03±0.18   | 1.16±0.35   | 1.22±0.30   | 1.24±0.16   |
| C2_12213  | UDP-glucuronosyltransferase 1-9                                | UGT1A9      | 1.05±0.16   | 0.84±0.12   | 1.17±0.10   | 1.71±0.34   |
| C2_7856   | UDP-glucuronosyltransferase 2A1                                | UGT2A1      | 1.12±0.18   | 1.08±0.37   | 1.77±0.43   | 1.04±0.17   |
| C2_5354   | UDP-glucuronosyltransferase 2A2                                | UGT2A2      | 1.43±0.34   | 1.19±0.43   | 1.84±0.46   | 1.23±0.19   |
| C2_24614  | UDP-glucuronosyltransferase 2A3                                | UGT2A3      | 1.15±0.21   | 1.10±0.27   | 1.55±0.49   | 0.96±0.20   |
| C2_54573  | UDP-glucuronosyltransferase 2B15                               | UGT2B7      | 1.14±0.13   | 0.90±0.32   | 1.78±0.69   | 0.85±0.12   |
| C2_111727 | UDP-glucuronosyltransferase 2B17                               | UGT2B17     | 1.22±0.29   | 0.89±0.19   | 0.99±0.19   | 1.06±0.28   |
| C2_12651  | UDP-N-acetylhexosamine pyrophosphorylase                       | UAP1        | 0.53±0.05   | 0.88±0.28   | 0.92±0.25   | 0.83±0.17   |
| C2_7433   | UDP-N-acetylhexosamine pyrophosphorylase-like protein 1        | UAP1L1      | 1.03±0.17   | 1.16±0.23   | 1.16±0.37   | 1.52±0.31   |
| C2_6090   | UMP-CMP kinase                                                 | CMPK1       | 0.76±0.09   | 1.04±0.27   | 1.75±0.67   | 1.77±0.63   |
| C2_3672   | Uncharacterized oxidoreductase C663.06c                        | SPCC663.06c | 1.07±0.13   | 1.67±0.26   | 1.09±0.19   | 1.16±0.14   |
| C2_9334   | UPF0160 protein MYG1, mitochondrial                            | C12orf10    | 1.75±0.26   | 1.17±0.18   | 0.92±0.09   | 1.37±0.28   |
| C2_6389   | UPF0308 protein C9orf21                                        | C9orf21     | 1.42±0.53   | 1.38±0.30   | 0.99±0.31   | 1.90±0.48   |
| C2_5877   | UPF0462 protein C4orf33 homolog                                | C4orf33     | 2.36±0.57   | 1.27±0.33   | 0.89±0.43   | 0.84±0.20   |
| C2_41651  | UPF0505 protein C16orf62 homolog                               | C16orf62    | 0.86±0.33   | 1.27±0.32   | 1.23±0.31   | 1.08±0.65   |
| C2_19805  | UPF0552 protein C15orf38 homolog                               | C15orf38    | 1.10±0.22   | 1.23±0.14   | 1.14±0.18   | 1.36±0.23   |
| C2_31615  | UPF0553 protein C9orf64 homolog                                | C9orf64     | 1.19±0.15   | 1.02±0.18   | 0.78±0.16   | 0.78±0.10   |
| C2_2220   | UPF0556 protein C19orf10 homolog                               | MYDGF       | 1.80±0.20   | 0.93±0.21   | 0.87±0.22   | 1.60±0.65   |
| C2_1340   | Uridine phosphorylase 1                                        | UPP1        | 1.08±0.15   | 1.35±0.22   | 0.92±0.12   | 0.96±0.14   |
| C2_4863   | UTP--glucose-1-phosphate uridylyltransferase                   | UGP2        | 1.13±0.14   | 0.98±0.12   | 1.14±0.17   | 1.06±0.10   |
| C2_20296  | UV excision repair protein RAD23 homolog A                     | RAD23A      | 1.31±0.29   | 1.07±0.12   | 1.28±0.14   | 1.27±0.20   |
| C2_15352  | UV excision repair protein RAD23 homolog B                     | RAD23B      | 4.01±2.29   | 1.78±0.67   | 2.12±0.77   | 1.73±0.49   |
| C2_8488   | Vacuolar protein sorting-associated protein 26B-like           | VPS26BL     | 1.09±0.21   | 1.03±0.15   | 1.09±0.20   | 1.20±0.22   |
| C2_6316   | Vacuolar protein sorting-associated protein 29                 | VPS29       | 0.96±0.07   | 1.13±0.16   | 1.27±0.17   | 1.20±0.11   |
| C2_3610   | Vacuolar protein sorting-associated protein 35                 | VPS35       | 1.03±0.22   | 1.33±0.28   | 1.22±0.12   | 1.00±0.14   |
| C2_2867   | Vacuolar protein sorting-associated protein 4B                 | VPS4B       | 0.97±0.14   | 1.29±0.10   | 0.98±0.17   | 1.34±0.32   |
| C2_4706   | Vacuolar protein-sorting-associated protein 36                 | VPS36       | 0.73±0.10   | 0.83±0.16   | 1.04±0.38   | 1.22±0.38   |
| C2_5562   | Very long-chain specific acyl-CoA dehydrogenase, mitochondrial | ACADVL      | 1.72±0.30   | 1.05±0.17   | 0.89±0.13   | 1.38±0.31   |
| C2_47981  | Very long-chain specific acyl-CoA dehydrogenase, mitochondrial | ACADVL      | 1.54±0.20   | 1.48±0.28   | 1.22±0.24   | 1.39±0.22   |
| C2_8296   | Vesicle-fusing ATPase                                          | NSF         | 1.15±0.40   | 1.16±0.25   | 1.32±0.21   | 1.11±0.19   |
| C2_1304   | Vigilin                                                        | HDLBP       | 1.05±0.16   | 0.78±0.06   | 0.94±0.19   | 1.15±0.15   |
| C2_10632  | Villin-1                                                       | VIL1        | 0.74±0.04   | 1.28±0.14   | 1.57±0.18   | 1.34±0.24   |
| C2_61501  | Villin-1                                                       | VIL1        | 0.89±0.26   | 1.70±0.47   | 1.70±0.37   | 1.46±0.34   |
| C2_9594   | Vinculin                                                       | VCL         | 0.87±0.19   | 0.92±0.26   | 1.25±0.26   | 1.25±0.20   |
| C2_44280  | Vinculin                                                       | VCL         | 1.57±0.24   | 1.27±0.42   | 1.80±0.55   | 1.76±0.69   |
| C2_661    | Voltage-dependent anion-selective channel protein 2            | VDAC2       | 1.36±0.21   | 1.00±0.27   | 1.57±0.51   | 1.25±0.14   |
| C2_119048 | Voltage-dependent anion-selective channel protein 3            | VDAC3       | 1.46±0.41   | 1.15±0.27   | 1.82±0.63   | 1.14±0.13   |
| C2_2397   | von Willebrand factor A domain-containing protein 5A           | VWASA       | 1.48±0.19   | 1.39±0.22   | 1.09±0.17   | 1.24±0.24   |
| C2_3806   | V-type proton ATPase catalytic subunit A                       | ATP6V1A     | 1.06±0.06   | 1.00±0.06   | 1.29±0.23   | 1.52±0.20   |
| C2_1084   | V-type proton ATPase subunit B                                 | ATP6V0A4    | 1.30±0.21   | 0.75±0.04   | 1.12±0.24   | 1.30±0.21   |
| C2_5241   | V-type proton ATPase subunit E 1                               | ATP6V0E1    | 1.29±0.10   | 0.88±0.11   | 1.26±0.29   | 1.24±0.19   |
| C2_18009  | V-type proton ATPase subunit G 1                               | ATP6V1G1    | 0.99±0.20   | 0.61±0.10   | 0.84±0.15   | 1.32±0.29   |
| C2_275    | V-type proton ATPase subunit H                                 | ATP6V1H     | 0.74±0.12   | 0.72±0.11   | 0.78±0.11   | 0.78±0.07   |
| C2_15764  | WD repeat domain phosphoinositide-interacting protein 3        | WDR45B      | 17.54±16.50 | 16.50±13.32 | 17.92±10.41 | 30.05±18.48 |
| C2_1420   | WD repeat-containing protein 1                                 | WDR1        | 2.51±0.61   | 1.42±0.21   | 1.23±0.14   | 1.27±0.16   |
| C2_1995   | WD repeat-containing protein 61                                | WDR61       | 1.79±0.38   | 1.27±0.17   | 0.98±0.19   | 0.99±0.23   |
| C2_4369   | Xaa-Pro aminopeptidase 1                                       | XPNPEP1     | 1.59±0.24   | 1.57±0.28   | 1.15±0.20   | 1.26±0.15   |
| C2_2468   | Xaa-Pro aminopeptidase 2                                       | XPNPEP2     | 2.23±0.41   | 1.26±0.28   | 0.94±0.29   | 0.87±0.17   |
| C2_1116   | Xaa-Pro dipeptidase                                            | PEPD        | 2.22±0.34   | 1.16±0.24   | 0.84±0.19   | 1.88±0.57   |
| C2_17124  | Xanthine dehydrogenase/oxidase                                 | XDH         | 1.61±0.47   | 1.10±0.11   | 1.02±0.22   | 1.22±0.22   |
| C2_10177  | Xylose isomerase                                               | XYLA        | 1.41±0.20   | 0.89±0.11   | 0.86±0.10   | 1.25±0.17   |
| C2_35539  | Zinc finger protein RFP                                        | TRIM27      | 1.26±0.14   | 0.99±0.06   | 1.11±0.12   | 1.33±0.23   |
| C2_16098  | Zinc-binding alcohol dehydrogenase domain-containing protein 2 | ZADH2       | 0.96±0.10   | 1.08±0.15   | 1.11±0.16   | 0.96±0.08   |
| C2_39339  | Zonadhesin                                                     | ZAN         | 2.39±0.23   | 0.88±0.25   | 0.76±0.26   | 1.09±0.34   |
| C2_90139  | Zonadhesin                                                     | ZAN         | 1.33±0.15   | 0.87±0.12   | 0.75±0.15   | 1.04±0.20   |
