# Supplementary material for: Under control: how a dietary additive can restore the gut microbiome and proteomic profile, and improve disease resilience in a marine teleostean fish fed vegetable diets
Source: Microbiome. 2017 Dec 28;5:164. doi: 10.1186/s40168-017-0390-3 (PMC5745981; doi:10.1186/s40168-017-0390-3)
Supplement: Supplementary file 2 — Percentage of the different bacterial OTUs identified in intestinal mucus of fish fed different diets. The results can be sorted by Phylum, Family, Genus and Species (OTUs). Numbers represent the mean percentage of four replicate pools. (XLSX 63 kb) [file 40168_2017_390_MOESM2_ESM.xlsx]

## Sheet: S1 Table
Supplementary Table S1
Phylum, Family, Genus and Species (OTUs) of bacteria identified in the intestinal mucus of fish fed different diets. Numbers represent the mean percentage of four replicate pools.
Row Labels	Sum of D1	Sum of D2	Sum of D3	Sum of D4
Actinobacteria	0.0138511	0.0313821	0.0371021	0.0621078
Acidothermaceae	0	0	0	0.0128499
Acidothermus	0	0	0	0.0128499
Acidothermus_cellulolyticus	0	0	0	0.0128499
Actinomycetaceae	0	0	0.00390549	0
Actinomyces	0	0	0.00390549	0
Actinomyces_naeslundii	0	0	0.00390549	0
Cellulomonadaceae	0	0	0	0.00214165
Oerskovia	0	0	0	0.00214165
Oerskovia_turbata	0	0	0	0.00214165
Corynebacteriaceae	0.00461702	0.00627641	0.0175747	0.0192748
Corynebacterium	0.00461702	0.00627641	0.0175747	0.0192748
Corynebacterium_confusum	0	0.00209214	0.00390549	0
Corynebacterium_falsenii	0.00230851	0	0.00781097	0
Corynebacterium_macginleyi	0	0	0.00585823	0.00214165
Corynebacterium_riegelii	0	0.00209214	0	0
Corynebacterium_sp.	0	0	0	0.00856659
Corynebacterium_sp._3301750	0.00230851	0	0	0
Corynebacterium_tuberculostearicum	0	0	0	0.00856659
Corynebacterium_ureicelerivorans	0	0.00209214	0	0
Dermabacteraceae	0	0	0	0.00214165
Brachybacterium	0	0	0	0.00214165
Brachybacterium_faecium	0	0	0	0.00214165
Dermacoccaceae	0	0	0	0.00214165
Dermacoccus	0	0	0	0.00214165
Dermacoccus_sp._Ellin185	0	0	0	0.00214165
Dietziaceae	0.00230851	0	0.00976372	0
Dietzia	0.00230851	0	0.00976372	0
Dietzia_natronolimnaea	0.00230851	0	0.00976372	0
Frankiaceae	0	0	0	0.0042833
Frankia	0	0	0	0.0042833
Frankia_sp.	0	0	0	0.0042833
Gordoniaceae	0	0	0	0.00214165
Williamsia	0	0	0	0.00214165
Williamsia_muralis	0	0	0	0.00214165
Microbacteriaceae	0	0.0104607	0	0
Leifsonia	0	0.0104607	0	0
Leifsonia_aquatica	0	0.00418428	0	0
Leifsonia_poae	0	0.00209214	0	0
Leifsonia_shinshuensis	0	0.00418428	0	0
Mycobacteriaceae	0.00461702	0.014645	0	0.00856659
Mycobacterium	0.00461702	0.014645	0	0.00856659
Mycobacterium_fallax	0	0.00209214	0	0
Mycobacterium_parascrofulaceum	0.00230851	0.00209214	0	0.00214165
Mycobacterium_parmense	0.00230851	0.00209214	0	0.00214165
Mycobacterium_sp._K328W	0	0.00418428	0	0.0042833
Mycobacterium_sphagni	0	0.00418428	0	0
Nocardiaceae	0	0	0.00195274	0.00214165
Nocardia	0	0	0	0.00214165
Nocardia_seriolae	0	0	0	0.00214165
Rhodococcus	0	0	0.00195274	0
Rhodococcus_erythropolis	0	0	0.00195274	0
Pseudonocardiaceae	0	0	0	0.0042833
Amycolatopsis	0	0	0	0.00214165
Amycolatopsis_lactamdurans	0	0	0	0.00214165
Pseudonocardia	0	0	0	0.00214165
Pseudonocardia_zijingensis	0	0	0	0.00214165
Rubrobacteraceae	0	0	0.00390549	0
Rubrobacter	0	0	0.00390549	0
Rubrobacter_xylanophilus	0	0	0.00390549	0
Streptomycetaceae	0	0	0	0.00214165
Streptomyces	0	0	0	0.00214165
Streptomyces_libani	0	0	0	0.00214165
Tsukamurellaceae	0.00230851	0	0	0
Tsukamurella	0.00230851	0	0	0
Tsukamurella_pulmonis	0.00230851	0	0	0
Bacteroidetes	0.68101	1.57329	3.92501	6.68623
Chitinophagaceae	0.0461702	0.51885	0.728373	0.235581
Chitinophaga	0.00230851	0	0.00195274	0.0042833
Chitinophaga_pinensis	0.00230851	0	0.00195274	0.0042833
Terrimonas	0.0438617	0.51885	0.726421	0.231298
Terrimonas_ferruginea	0.00230851	0.0585799	0.12107	0.154199
Terrimonas_lutea	0.0415532	0.46027	0.605351	0.0770994
Cytophagaceae	0	0	0	0.00214165
Sporocytophaga	0	0	0	0.00214165
Sporocytophaga_cauliformis	0	0	0	0.00214165
Flammeovirgaceae	0	0.00209214	0	0
Flexithrix	0	0.00209214	0	0
Flexithrix_dorotheae	0	0.00209214	0	0
Flavobacteriaceae	0.219308	0.0543956	0.39836	1.1415
Capnocytophaga	0	0	0.00195274	0
Capnocytophaga_canimorsus	0	0	0.00195274	0
Chryseobacterium	0.0138511	0.0230135	0.115212	0.449746
Chryseobacterium_balustinum	0.00230851	0.00836855	0.00195274	0
Chryseobacterium_formosense	0	0	0	0.190607
Chryseobacterium_gleum	0.00230851	0.00836855	0	0
Chryseobacterium_indologenes	0.00923404	0.00627641	0.113259	0.259139
Dokdonia	0.00230851	0	0.00781097	0.00642495
Dokdonia_donghaensis	0.00230851	0	0.00781097	0.00642495
Elizabethkingia	0	0.00209214	0.00390549	0.0128499
Elizabethkingia_meningoseptica	0	0.00209214	0.00390549	0.0128499
Flavobacteriaceae	0	0.00209214	0	0.00214165
Flavobacteriaceae_bacterium_3519-10	0	0.00209214	0	0.00214165
Flavobacterium	0.20084	0.0188292	0.109354	0.282698
Flavobacterium_columnare	0.0877233	0.00209214	0	0.22059
Flavobacterium_hibernum	0	0	0.00781097	0
Flavobacterium_hydatis	0.00230851	0.00209214	0	0
Flavobacterium_johnsoniae	0.0554042	0.00418428	0.0136692	0.0449746
Flavobacterium_sp.	0.0554042	0.00418428	0.0820152	0.0149915
Flavobacterium_sp._BH12.12	0	0.00209214	0	0
Flavobacterium_sp._MSY2	0	0.00418428	0.00390549	0.00214165
Flavobacterium_sp._SOC_A4(12)	0	0	0.00195274	0
Hymenobacter	0	0.00209214	0	0.00214165
Hymenobacter_chitinivorans	0	0.00209214	0	0
Hymenobacter_psychrotolerans	0	0	0	0.00214165
Leeuwenhoekiella	0	0.00209214	0	0.00214165
Leeuwenhoekiella_marinoflava	0	0.00209214	0	0.00214165
Myroides	0.00230851	0.00418428	0.0351494	0.0856659
Myroides_odoratimimus	0.00230851	0.00209214	0.0214802	0.0749577
Myroides_odoratus	0	0.00209214	0.0136692	0.00856659
Myroides_profundi	0	0	0	0.00214165
Polaribacter	0	0	0	0.00214165
Polaribacter_filamentus	0	0	0	0.00214165
Riemerella	0	0	0.117165	0.289123
Riemerella_anatipestifer	0	0	0.117165	0.289123
Tenacibaculum	0	0	0	0.00214165
Tenacibaculum_maritimum	0	0	0	0.00214165
Zunongwangia	0	0	0.00781097	0.0042833
Zunongwangia_profunda	0	0	0.00781097	0.0042833
Marinilabiliaceae	0	0	0	0.00214165
Marinilabilia	0	0	0	0.00214165
Marinilabilia_salmonicolor	0	0	0	0.00214165
Porphyromonadaceae	0.415532	0.99795	2.75532	5.24704
Parabacteroides	0	0	0	0.0042833
Parabacteroides_goldsteinii	0	0	0	0.0042833
Porphyromonas	0.237776	0.0899619	0	0
Porphyromonas_gingivalis	0.237776	0.0899619	0	0
Tannerella	0.177755	0.907988	2.75532	5.24276
Tannerella_forsythia	0.177755	0.907988	2.75532	5.24276
Sphingobacteriaceae	0	0	0.0429604	0.0556829
Pedobacter	0	0	0.00781097	0.0385497
Pedobacter_heparinus	0	0	0.00390549	0.0149915
Pedobacter_sp._4236	0	0	0	0.0149915
Pedobacter_sp._MJ11	0	0	0.00390549	0.00856659
Sphingobacterium	0	0	0.0351494	0.0171332
Sphingobacterium_kitahiroshimense	0	0	0.00195274	0.00642495
Sphingobacterium_multivorum	0	0	0.0253857	0.00214165
Sphingobacterium_sp._PM2-P1-29	0	0	0	0.00856659
Sphingobacterium_spiritivorum	0	0	0.00781097	0
Sphingomonadaceae	0	0	0	0.00214165
Porphyrobacter	0	0	0	0.00214165
Porphyrobacter_tepidarius	0	0	0	0.00214165
Chlorobi	0	0.00209214	0	0
Chlorobiaceae	0	0.00209214	0	0
Chlorobium	0	0.00209214	0	0
Chlorobium_phaeobacteroides	0	0.00209214	0	0
Cyanobacteria	0.0115425	0.00209214	0.0312439	0.00856659
Synechococcaceae	0.0115425	0.00209214	0.0312439	0.00856659
Synechococcus	0.0115425	0.00209214	0.0312439	0.00856659
Synechococcus_sp._CC9902	0.00230851	0	0.00781097	0
Synechococcus_sp._CCMP839	0	0	0.00195274	0
Synechococcus_sp._WH_7803	0.00692553	0.00209214	0.00976372	0.00856659
Synechococcus_sp._WH_8012	0.00230851	0	0.00781097	0
Synechococcus_sp._WH_8102	0	0	0.00195274	0
Synechococcus_sp._WH_8103	0	0	0.00195274	0
Deinococcus-Thermus	0.00230851	0	0.00195274	0
Thermaceae	0.00230851	0	0.00195274	0
Thermus	0.00230851	0	0.00195274	0
Thermus_sp._YBJ-1	0.00230851	0	0.00195274	0
Firmicutes	0.0969574	2.98966	2.9506	18.0177
Bacillaceae	0.0877233	2.88506	2.86272	17.8656
Bacillus	0.0761808	1.7574	2.43312	16.6942
Bacillus_cereus	0.0715638	1.74903	2.37258	16.5657
Bacillus_circulans	0	0	0	0.00214165
Bacillus_halodurans	0	0.00418428	0	0.0042833
Bacillus_horikoshii	0	0	0	0.00214165
Bacillus_licheniformis	0	0	0	0.00214165
Bacillus_litoralis	0	0	0.00195274	0.00214165
Bacillus_methanolicus	0	0	0.00390549	0
Bacillus_sp.	0	0	0	0.00214165
Bacillus_sp._JB99	0	0	0	0.00214165
Bacillus_sp._TA2.A1	0	0	0.00390549	0
Bacillus_thuringiensis	0	0	0.00195274	0
Bacillus_weihenstephanensis	0.00461702	0.00418428	0.0488186	0.111366
Exiguobacterium	0	0	0	0.00214165
Exiguobacterium_aurantiacum	0	0	0	0.00214165
Geobacillus	0.0115425	1.12766	0.429604	1.16934
Geobacillus_caldoproteolyticus	0	0	0.29877	0.00214165
Geobacillus_pallidus	0.0115425	0	0.123023	0.0278414
Geobacillus_sp._A60	0	1.12766	0	1.13722
Geobacillus_sp._S23	0	0	0.00195274	0.00214165
Geobacillus_stearothermophilus	0	0	0.00390549	0
Geobacillus_thermoleovorans	0	0	0.00195274	0
Carnobacteriaceae	0	0.00418428	0.0117165	0
Carnobacterium	0	0	0.00390549	0
Carnobacterium_sp._St2	0	0	0.00390549	0
Granulicatella	0	0.00418428	0	0
Granulicatella_elegans	0	0.00418428	0	0
Trichococcus	0	0	0.00781097	0
Trichococcus_pasteurii	0	0	0.00781097	0
Caulobacteraceae	0	0	0.00781097	0.00214165
Brevundimonas	0	0	0.00390549	0.00214165
Brevundimonas_bullata	0	0	0.00390549	0.00214165
Caulobacter	0	0	0.00390549	0
Caulobacter_fusiformis	0	0	0.00195274	0
Caulobacter_sp._FWC17	0	0	0.00195274	0
Clostridiaceae	0	0.0523034	0	0.0556829
Clostridium	0	0.0523034	0	0.0556829
Clostridium_bifermentans	0	0	0	0.0042833
Clostridium_butyricum	0	0.00209214	0	0.0449746
Clostridium_glycolicum	0	0.0502113	0	0
Clostridium_sartagoforme	0	0	0	0.00642495
Enterococcaceae	0.00692553	0.0230135	0.0390549	0.0749577
Enterococcus	0.00692553	0.0209214	0.0390549	0.0728161
Enterococcus_avium	0	0	0	0.00214165
Enterococcus_casseliflavus	0.00230851	0	0	0
Enterococcus_faecalis	0	0	0	0.00214165
Enterococcus_faecium	0	0.00209214	0	0
Enterococcus_gallinarum	0	0	0.00195274	0
Enterococcus_gilvus	0.00461702	0.00418428	0.00585823	0.0171332
Enterococcus_hermanniensis	0	0.00209214	0	0
Enterococcus_malodoratus	0	0.0104607	0.0312439	0.0278414
Enterococcus_raffinosus	0	0	0	0.0235581
Enterococcus_sp._CSL_7544-3	0	0.00209214	0	0
Vagococcus	0	0.00209214	0	0.00214165
Vagococcus_fluvialis	0	0.00209214	0	0.00214165
Paenibacillaceae	0	0.00627641	0.00781097	0.0042833
Paenibacillus	0	0.00627641	0.00781097	0.0042833
Paenibacillus_apiarius	0	0.00209214	0	0.00214165
Paenibacillus_ehimensis	0	0	0.00390549	0
Paenibacillus_macerans	0	0.00418428	0.00390549	0
Paenibacillus_sp._Ao3	0	0	0	0.00214165
Peptoniphilaceae	0	0.00209214	0	0
Peptoniphilus	0	0.00209214	0	0
Peptoniphilus_indolicus	0	0.00209214	0	0
Planococcaceae	0	0	0.00390549	0
Planomicrobium	0	0	0.00390549	0
Planomicrobium_okeanokoites	0	0	0.00390549	0
Staphylococcaceae	0.00230851	0.0167371	0.0117165	0.0149915
Gemella	0	0.0104607	0.00195274	0
Gemella_haemolysans	0	0.0104607	0	0
Gemella_morbillorum	0	0	0.00195274	0
Staphylococcus	0.00230851	0.00627641	0.00976372	0.0149915
Staphylococcus_aureus	0	0.00209214	0.00390549	0.00214165
Staphylococcus_caprae	0	0	0	0.0042833
Staphylococcus_epidermidis	0	0.00418428	0	0.0042833
Staphylococcus_equorum	0	0	0	0.0042833
Staphylococcus_hominis	0.00230851	0	0.00195274	0
Staphylococcus_saprophyticus	0	0	0.00390549	0
Streptococcaceae	0	0	0.00585823	0
Streptococcus	0	0	0.00585823	0
Streptococcus_suis	0	0	0.00585823	0
Fusobacteria	0.392447	0.376585	0.224566	9.85801
Fusobacteriaceae	0.392447	0.376585	0.224566	9.85801
Fusobacterium	0.244702	0.374493	0.224566	9.78733
Fusobacterium_equinum	0.101574	0	0	0
Fusobacterium_mortiferum	0.0277021	0	0.00976372	3.04757
Fusobacterium_necrophorum	0.0923404	0.165279	0.195274	6.47206
Fusobacterium_nucleatum	0.0230851	0.104607	0.00976372	0.23344
Fusobacterium_perfoetens	0	0.104607	0	0.00214165
Fusobacterium_varium	0	0	0.00976372	0.0321247
Ilyobacter	0.0230851	0	0	0
Ilyobacter_tartaricus	0.0230851	0	0	0
Leptotrichia	0	0.00209214	0	0
Leptotrichia_trevisanii	0	0.00209214	0	0
Propionigenium	0.124659	0	0	0.0706744
Propionigenium_modestum	0.124659	0	0	0.0706744
Other	0	0.00209214	0	0.00214165
Other	0	0.00209214	0	0.00214165
Other	0	0.00209214	0	0.00214165
Glechoma_hederacea	0	0	0	0.00214165
Pinus_thunbergii	0	0.00209214	0	0
Planctomycetes	0.00230851	0.00209214	0.00585823	0.0042833
Planctomycetaceae	0.00230851	0.00209214	0.00585823	0.0042833
Planctomyces	0.00230851	0.00209214	0.00585823	0.00214165
Planctomyces_limnophilus	0.00230851	0.00209214	0.00585823	0.00214165
Rhodopirellula	0	0	0	0.00214165
Rhodopirellula_baltica	0	0	0	0.00214165
Proteobacteria	93.1922	93.5667	86.9967	60.0732
Aeromonadaceae	0	0.104607	0.0410076	0.0749577
Aeromonas	0	0.104607	0.0410076	0.0749577
Aeromonas_eucrenophila	0	0.00209214	0	0
Aeromonas_jandaei	0	0.0355663	0.0117165	0.0107082
Aeromonas_media	0	0.0523034	0	0
Aeromonas_popoffii	0	0	0.0273384	0.0278414
Aeromonas_salmonicida	0	0.014645	0	0
Aeromonas_veronii	0	0	0.00195274	0.036408
Alcaligenaceae	0.00461702	0.00418428	0.0585823	0.100657
Achromobacter	0.00461702	0.00418428	0.0585823	0.100657
uncultured_Achromobacter_sp.	0.00461702	0.00418428	0.0585823	0.100657
Alteromonadaceae	0	0	0.00195274	0.0042833
Alteromonas	0	0	0	0.00214165
Alteromonas_sp.	0	0	0	0.00214165
Microbulbifer	0	0	0.00195274	0.00214165
Microbulbifer_elongatus	0	0	0.00195274	0.00214165
Bacteroidaceae	0.00230851	0.0564877	0.0292912	0.41548
Bacteroides	0.00230851	0.0523034	0.0273384	0.406913
Bacteroides_sp.	0.00230851	0.0523034	0.0273384	0.406913
Cytophaga	0	0.00418428	0.00195274	0.00856659
Cytophaga_sp.	0	0.00418428	0.00195274	0.00856659
Bradyrhizobiaceae	0.0300106	0.12762	0.00976372	0.079241
Afipia	0	0.00209214	0	0.00214165
Afipia_broomeae	0	0.00209214	0	0
uncultured_Afipia_sp.	0	0	0	0.00214165
Bradyrhizobium	0.0300106	0.123436	0.00976372	0.0770994
Bradyrhizobium_japonicum	0	0.0313821	0	0.0042833
Bradyrhizobium_sp._TSA27s	0.0300106	0.0920541	0.00976372	0.0728161
Rhodopseudomonas	0	0.00209214	0	0
Rhodopseudomonas_palustris	0	0.00209214	0	0
Brucellaceae	0	0	0	0.0128499
Ochrobactrum	0	0	0	0.0128499
Ochrobactrum_tritici	0	0	0	0.0128499
Campylobacteraceae	0	0	0.00390549	0
Arcobacter	0	0	0.00390549	0
Arcobacter_cryaerophilus	0	0	0.00390549	0
Chromatiaceae	0.00230851	0.00209214	0.00585823	0.00642495
Lamprocystis	0	0	0.00195274	0
Lamprocystis_purpurea	0	0	0.00195274	0
Thiocystis	0.00230851	0.00209214	0.00390549	0.00642495
Thiocystis_violacea	0.00230851	0.00209214	0.00390549	0.00642495
Comamonadaceae	0.00461702	0.00418428	0.00781097	0.0342664
Acidovorax	0.00230851	0.00209214	0	0
Acidovorax_citrulli	0.00230851	0	0	0
Acidovorax_sp._R-27044	0	0.00209214	0	0
Comamonas	0.00230851	0.00209214	0.00390549	0.0321247
Comamonas_aquatica	0	0.00209214	0.00195274	0.0235581
Comamonas_denitrificans	0.00230851	0	0	0
Comamonas_sp.	0	0	0	0.0042833
Comamonas_sp._R-24451	0	0	0.00195274	0
Comamonas_testosteroni	0	0	0	0.0042833
Diaphorobacter	0	0	0.00390549	0.00214165
Diaphorobacter_nitroreducens	0	0	0.00390549	0.00214165
Desulfovibrionaceae	0	0	0.00390549	0.0471163
Desulfovibrio	0	0	0.00390549	0.0471163
Desulfovibrio_intestinalis	0	0	0.00390549	0.0471163
Enterobacteriaceae	0.163904	0.54814	0.658075	4.35183
Enterobacter	0.00692553	0	0.0624878	0
Enterobacter_sp._XW122	0.00692553	0	0.0624878	0
Erwinia	0	0	0	0.00214165
Erwinia_persicina	0	0	0	0.00214165
Escherichia	0	0.0230135	0.00195274	0.00214165
Escherichia_coli	0	0.0230135	0.00195274	0.00214165
Hafnia	0.00461702	0.0125528	0.00390549	0.137066
Hafnia_alvei	0.00461702	0.0125528	0.00390549	0.137066
Morganella	0.0115425	0	0.00195274	0.719594
Morganella_morganii	0.0115425	0	0.00195274	0.719594
Obesumbacterium	0.00230851	0.00209214	0.00195274	0
Obesumbacterium_proteus	0.00230851	0.00209214	0.00195274	0
Pantoea	0.00230851	0.0104607	0.0175747	0.0214165
Pantoea_agglomerans	0.00230851	0.00627641	0.00390549	0
Pantoea_ananatis	0	0.00418428	0.0136692	0.0214165
Pectobacterium	0	0	0	0.0042833
Pectobacterium_carotovorum	0	0	0	0.0042833
Plesiomonas	0	0.0251057	0.00390549	0.0192748
Plesiomonas_shigelloides	0	0.0251057	0.00390549	0.0192748
Proteus	0.0161596	0.294991	0.26362	0.59752
Proteus_penneri	0	0.0125528	0	0
Proteus_sp._K107	0.00692553	0.0271978	0.0273384	0.00214165
Proteus_vulgaris	0.00923404	0.255241	0.236282	0.595378
Providencia	0	0	0	0.00856659
Providencia_rettgeri	0	0	0	0.00856659
Serratia	0	0	0	0.0128499
Serratia_odorifera	0	0	0	0.0128499
Shigella	0.00230851	0	0	0.134924
Shigella_flexneri	0	0	0	0.134924
Shigella_sonnei	0.00230851	0	0	0
Yersinia	0.117734	0.179924	0.300723	2.69205
Yersinia_intermedia	0.00461702	0.00418428	0.187463	2.69205
Yersinia_kristensenii	0.0438617	0.17574	0.113259	0
Yersinia_rohdei	0.0692553	0	0	0
Halomonadaceae	0	0.00209214	0.00781097	0.042833
Halomonas	0	0.00209214	0.00781097	0.042833
Halomonas_aquamarina	0	0	0.00195274	0
Halomonas_campisalis	0	0	0.00195274	0
Halomonas_cerina	0	0	0	0.0342664
Halomonas_meridiana	0	0.00209214	0	0.00214165
Halomonas_sp._GWS-SE-H246	0	0	0.00195274	0.0042833
Halomonas_sp._NT_N60	0	0	0	0.00214165
Halomonas_venusta	0	0	0.00195274	0
Hyphomicrobiaceae	0.117734	0.39123	0.24214	0.261281
Hyphomicrobium	0.117734	0.39123	0.24214	0.261281
Hyphomicrobium_facile	0	0.0795012	0	0
Hyphomicrobium_sulfonivorans	0	0	0.0136692	0
uncultured_Hyphomicrobium_sp.	0.117734	0.311729	0.228471	0.261281
Legionellaceae	0.00461702	0.0439349	0.0214802	0.102799
Legionella	0.00461702	0.0439349	0.0214802	0.102799
Legionella_anisa	0.00461702	0.0439349	0.0195274	0.102799
Legionella_nautarum	0	0	0.00195274	0
Methylobacteriaceae	0.346276	0.575338	1.26733	0.340522
Methylobacterium	0.346276	0.575338	1.26733	0.340522
Methylobacterium_aquaticum	0.120042	0.00418428	0.171841	0
Methylobacterium_jeotgali	0	0.0271978	0	0.0042833
Methylobacterium_persicinum	0	0	0.0195274	0
Methylobacterium_platani	0	0	0.00195274	0
Methylobacterium_radiotolerans	0.00230851	0.00627641	0.00195274	0.0042833
Methylobacterium_rhodesianum	0.219308	0.263609	0.667838	0.319106
Methylobacterium_salsuginis	0.00461702	0	0	0
Methylobacterium_sp._Hojyo1	0	0.261517	0.402265	0.0107082
uncultured_Methylobacterium_sp.	0	0.0125528	0.00195274	0.00214165
Methylococcaceae	0	0	0	0.00214165
Methylobacter	0	0	0	0.00214165
Methylobacter_vinelandii	0	0	0	0.00214165
Micrococcaceae	0.00230851	0.00627641	0.00976372	0.00856659
Arthrobacter	0.00230851	0	0	0
Arthrobacter_protophormiae	0.00230851	0	0	0
Micrococcus	0	0.00627641	0.00976372	0.00856659
Micrococcus_luteus	0	0.00627641	0.00585823	0.00856659
Micrococcus_sp._SMCC_ZAT352	0	0	0.00390549	0
Micrococcaceae	0	0.00418428	0.00195274	0.0042833
Nesterenkonia	0	0.00418428	0.00195274	0.0042833
Nesterenkonia_aethiopica	0	0.00209214	0.00195274	0.0042833
Nesterenkonia_xinjiangensis	0	0.00209214	0	0
Moraxellaceae	0	0.00209214	0.00195274	0
Acinetobacter	0	0.00209214	0.00195274	0
Acinetobacter_johnsonii	0	0.00209214	0	0
Acinetobacter_xiamenensis	0	0	0.00195274	0
Nitrosomonadaceae	0	0	0.00195274	0
Unknown	0	0	0.00195274	0
uncultured_Nitrosomonadaceae_bacterium	0	0	0.00195274	0
Oxalobacteraceae	0.00461702	0.0795012	0.00976372	0.104941
Duganella	0	0	0	0.00214165
Duganella_zoogloeoides	0	0	0	0.00214165
Janthinobacterium	0.00461702	0.0795012	0.00976372	0.102799
Janthinobacterium_lividum	0	0	0	0.0599662
Janthinobacterium_sp._SY12	0.00461702	0.0795012	0.00976372	0.042833
Propionibacteriaceae	0.0138511	0.0815934	0.0820152	0.0556829
Propionibacterium	0.0138511	0.0815934	0.0820152	0.0556829
Propionibacterium_acnes	0.0138511	0.0815934	0.0820152	0.0556829
Pseudomonadaceae	0.00923404	0.426796	0.322203	0.387638
Pseudomonas	0.00923404	0.426796	0.322203	0.387638
Pseudomonas_aeruginosa	0	0	0.318297	0
Pseudomonas_coronafaciens	0.00692553	0	0	0.00214165
Pseudomonas_extremaustralis	0	0.00209214	0.00390549	0.00214165
Pseudomonas_putida	0	0.424704	0	0.154199
Pseudomonas_sp._CO-1	0	0	0	0.00214165
Pseudomonas_sp._OPS1	0	0	0	0.14349
Pseudomonas_stutzeri	0	0	0	0.0813826
Pseudomonas_syringae	0.00230851	0	0	0
uncultured_Pseudomonas_sp.	0	0	0	0.00214165
Ralstoniaceae	0.0600212	1.54609	0.757665	0.387638
Ralstonia	0.0600212	1.54609	0.757665	0.387638
Ralstonia_insidiosa	0	0	0	0.0149915
Ralstonia_pickettii	0.0438617	1.50843	0.743995	0.368364
uncultured_Ralstonia_sp.	0.0161596	0.0376585	0.0136692	0.0042833
Rhodobacteraceae	0	0	0.00195274	0.00214165
Rhodobacteraceae	0	0	0	0.00214165
Rhodobacteraceae_bacterium_GWS-BW-H55M	0	0	0	0.00214165
Ruegeria	0	0	0.00195274	0
Ruegeria_atlantica	0	0	0.00195274	0
Rhodospirillaceae	0	0	0	0.0192748
Azospirillum	0	0	0	0.0192748
Azospirillum_brasilense	0	0	0	0.0171332
Azospirillum_sp._BV-s	0	0	0	0.00214165
Shewanellaceae	0.00923404	0.0920541	0.0663933	0.0749577
Shewanella	0.00923404	0.0920541	0.0663933	0.0749577
Shewanella_algae	0	0.00209214	0.0371021	0.00642495
Shewanella_baltica	0	0	0	0.0385497
Shewanella_decolorationis	0	0	0.00390549	0
Shewanella_frigidimarina	0.00230851	0.00209214	0	0.0042833
Shewanella_hafniensis	0	0	0	0.00214165
Shewanella_haliotis	0.00230851	0.00418428	0.00585823	0.00642495
Shewanella_oneidensis	0	0	0.00195274	0
Shewanella_putrefaciens	0	0.0815934	0.0156219	0.0042833
Shewanella_sp._184	0	0	0.00195274	0.00214165
Shewanella_sp._ANA-3	0	0	0	0.0042833
Shewanella_sp._MR-4	0.00461702	0.00209214	0	0.00214165
Shewanella_sp._S2	0	0	0	0.0042833
Vibrionaceae	92.4142	89.4619	83.3548	53.0979
Aliivibrio	1.09192	0.00418428	0.00976372	0.9359
Aliivibrio_fischeri	1.09192	0.00209214	0.00781097	0.9359
Aliivibrio_logei	0	0.00209214	0	0
Aliivibrio_salmonicida	0	0	0.00195274	0
Enterovibrio	0	0	0	0.00214165
Enterovibrio_nigricans	0	0	0	0.00214165
Photobacterium	71.4714	70.1305	81.4958	45.2937
Photobacterium_damselae	59.1509	69.5971	81.3591	44.5613
Photobacterium_ganghwense	0.210074	0.0397506	0.00195274	0.184182
Photobacterium_indicum	0	0.0502113	0	0
Photobacterium_leiognathi	12.0966	0.42052	0.0859207	0.456171
Photobacterium_sp._FLKF1	0	0	0.00195274	0
Photobacterium_sp._OIM3	0.0138511	0.0230135	0.0468658	0.0920909
Vibrio	19.8509	19.3272	1.84925	6.86613
Vibrio_alginolyticus	0	0.00209214	0.00390549	0
Vibrio_campbellii	0.0184681	0.00209214	0	0
Vibrio_cholerae	0.00461702	0.171555	0.0195274	1.30855
Vibrio_gallicus	0.00230851	0	0	0
Vibrio_harveyi	8.58073	2.38713	0.607303	0.104941
Vibrio_hispanicus	0.110808	0	0	0
Vibrio_ichthyoenteri	0	0	0	0.00214165
Vibrio_mimicus	0.191606	2.97084	0.433509	0.173474
Vibrio_natriegens	0	0	0.00195274	0.00214165
Vibrio_nereis	0.00461702	0	0	0
Vibrio_ordalii	0	0.00209214	0.00195274	0
Vibrio_parahaemolyticus	0.00230851	0.00209214	0.0156219	0.00214165
Vibrio_ponticus	7.42878	13.5947	0.58387	3.59797
Vibrio_sp.	1.12655	0.123436	0.173794	0.342664
Vibrio_sp._0908	0	0.00418428	0	0
Vibrio_sp._12E01	0	0.00627641	0	0
Vibrio_sp._QY102	0	0	0	0.0214165
Vibrio_vulnificus	2.38007	0.060672	0.00781097	1.31069
Xanthomonadaceae	0.00230851	0.00627641	0.0273384	0.0535412
Pseudoxanthomonas	0	0	0.00195274	0
Pseudoxanthomonas_sp._BD-a59	0	0	0.00195274	0
Rhodanobacter	0	0	0.00390549	0.00642495
Rhodanobacter_ginsenosidimutans	0	0	0.00390549	0.00642495
Stenotrophomonas	0.00230851	0.00627641	0.0214802	0.0449746
Stenotrophomonas_maltophilia	0.00230851	0.00627641	0	0.0449746
Stenotrophomonas_nitritireducens	0	0	0.0214802	0
Xanthomonas	0	0	0	0.00214165
Xanthomonas_campestris	0	0	0	0.00214165
Unknown	5.60737	1.45404	5.82699	5.28773
Unknown	5.60737	1.45404	5.82699	5.28773
Unknown	5.60737	1.45404	5.82699	5.28773
bacterium_py129	0	0.00418428	0	0
uncultured_alpha_proteobacterium	0	0	0.00195274	0.00214165
uncultured_bacterium	5.59583	1.3578	5.54384	2.39222
uncultured_beta_proteobacterium	0	0	0	0.00214165
uncultured_gamma_proteobacterium	0.00230851	0.00627641	0.00976372	2.85268
uncultured_marine_bacterium	0	0	0.0175747	0
uncultured_marine_microorganism	0	0.00418428	0.00195274	0
uncultured_organism	0	0	0.0136692	0
uncultured_proteobacterium	0.00461702	0.00209214	0	0.0149915
uncultured_soil_bacterium	0	0.0627641	0.232376	0.0171332
unidentified	0.00461702	0.0167371	0.00390549	0.00214165
unidentified_marine_eubacterium	0	0	0.00195274	0.0042833
Grand Total	100	100	100	100

## Sheet: OTUs %
Phylum	Family	Genus	Species	D1	D2	D3	D4
Actinobacteria	Acidothermaceae	Acidothermus	Acidothermus_cellulolyticus	0	0	0	0.0128499
Actinobacteria	Actinomycetaceae	Actinomyces	Actinomyces_naeslundii	0	0	0.00390549	0
Proteobacteria	Aeromonadaceae	Aeromonas	Aeromonas_eucrenophila	0	0.00209214	0	0
Proteobacteria	Aeromonadaceae	Aeromonas	Aeromonas_jandaei	0	0.0355663	0.0117165	0.0107082
Proteobacteria	Aeromonadaceae	Aeromonas	Aeromonas_media	0	0.0523034	0	0
Proteobacteria	Aeromonadaceae	Aeromonas	Aeromonas_popoffii	0	0	0.0273384	0.0278414
Proteobacteria	Aeromonadaceae	Aeromonas	Aeromonas_salmonicida	0	0.014645	0	0
Proteobacteria	Aeromonadaceae	Aeromonas	Aeromonas_veronii	0	0	0.00195274	0.036408
Proteobacteria	Alcaligenaceae	Achromobacter	uncultured_Achromobacter_sp.	0.00461702	0.00418428	0.0585823	0.100657
Proteobacteria	Alteromonadaceae	Alteromonas	Alteromonas_sp.	0	0	0	0.00214165
Proteobacteria	Alteromonadaceae	Microbulbifer	Microbulbifer_elongatus	0	0	0.00195274	0.00214165
Firmicutes	Bacillaceae	Bacillus	Bacillus_cereus	0.0715638	1.74903	2.37258	16.5657
Firmicutes	Bacillaceae	Bacillus	Bacillus_circulans	0	0	0	0.00214165
Firmicutes	Bacillaceae	Bacillus	Bacillus_halodurans	0	0.00418428	0	0.0042833
Firmicutes	Bacillaceae	Bacillus	Bacillus_horikoshii	0	0	0	0.00214165
Firmicutes	Bacillaceae	Bacillus	Bacillus_licheniformis	0	0	0	0.00214165
Firmicutes	Bacillaceae	Bacillus	Bacillus_litoralis	0	0	0.00195274	0.00214165
Firmicutes	Bacillaceae	Bacillus	Bacillus_methanolicus	0	0	0.00390549	0
Firmicutes	Bacillaceae	Bacillus	Bacillus_sp.	0	0	0	0.00214165
Firmicutes	Bacillaceae	Bacillus	Bacillus_sp._JB99	0	0	0	0.00214165
Firmicutes	Bacillaceae	Bacillus	Bacillus_sp._TA2.A1	0	0	0.00390549	0
Firmicutes	Bacillaceae	Bacillus	Bacillus_thuringiensis	0	0	0.00195274	0
Firmicutes	Bacillaceae	Bacillus	Bacillus_weihenstephanensis	0.00461702	0.00418428	0.0488186	0.111366
Firmicutes	Bacillaceae	Exiguobacterium	Exiguobacterium_aurantiacum	0	0	0	0.00214165
Firmicutes	Bacillaceae	Geobacillus	Geobacillus_caldoproteolyticus	0	0	0.29877	0.00214165
Firmicutes	Bacillaceae	Geobacillus	Geobacillus_pallidus	0.0115425	0	0.123023	0.0278414
Firmicutes	Bacillaceae	Geobacillus	Geobacillus_sp._A60	0	1.12766	0	1.13722
Firmicutes	Bacillaceae	Geobacillus	Geobacillus_sp._S23	0	0	0.00195274	0.00214165
Firmicutes	Bacillaceae	Geobacillus	Geobacillus_stearothermophilus	0	0	0.00390549	0
Firmicutes	Bacillaceae	Geobacillus	Geobacillus_thermoleovorans	0	0	0.00195274	0
Proteobacteria	Bacteroidaceae	Bacteroides	Bacteroides_sp.	0.00230851	0.0523034	0.0273384	0.406913
Proteobacteria	Bacteroidaceae	Cytophaga	Cytophaga_sp.	0	0.00418428	0.00195274	0.00856659
Proteobacteria	Bradyrhizobiaceae	Afipia	Afipia_broomeae	0	0.00209214	0	0
Proteobacteria	Bradyrhizobiaceae	Afipia	uncultured_Afipia_sp.	0	0	0	0.00214165
Proteobacteria	Bradyrhizobiaceae	Bradyrhizobium	Bradyrhizobium_japonicum	0	0.0313821	0	0.0042833
Proteobacteria	Bradyrhizobiaceae	Bradyrhizobium	Bradyrhizobium_sp._TSA27s	0.0300106	0.0920541	0.00976372	0.0728161
Proteobacteria	Bradyrhizobiaceae	Rhodopseudomonas	Rhodopseudomonas_palustris	0	0.00209214	0	0
Proteobacteria	Brucellaceae	Ochrobactrum	Ochrobactrum_tritici	0	0	0	0.0128499
Proteobacteria	Campylobacteraceae	Arcobacter	Arcobacter_cryaerophilus	0	0	0.00390549	0
Firmicutes	Carnobacteriaceae	Carnobacterium	Carnobacterium_sp._St2	0	0	0.00390549	0
Firmicutes	Carnobacteriaceae	Granulicatella	Granulicatella_elegans	0	0.00418428	0	0
Firmicutes	Carnobacteriaceae	Trichococcus	Trichococcus_pasteurii	0	0	0.00781097	0
Firmicutes	Caulobacteraceae	Brevundimonas	Brevundimonas_bullata	0	0	0.00390549	0.00214165
Firmicutes	Caulobacteraceae	Caulobacter	Caulobacter_fusiformis	0	0	0.00195274	0
Firmicutes	Caulobacteraceae	Caulobacter	Caulobacter_sp._FWC17	0	0	0.00195274	0
Actinobacteria	Cellulomonadaceae	Oerskovia	Oerskovia_turbata	0	0	0	0.00214165
Bacteroidetes	Chitinophagaceae	Chitinophaga	Chitinophaga_pinensis	0.00230851	0	0.00195274	0.0042833
Bacteroidetes	Chitinophagaceae	Terrimonas	Terrimonas_ferruginea	0.00230851	0.0585799	0.12107	0.154199
Bacteroidetes	Chitinophagaceae	Terrimonas	Terrimonas_lutea	0.0415532	0.46027	0.605351	0.0770994
Chlorobi	Chlorobiaceae	Chlorobium	Chlorobium_phaeobacteroides	0	0.00209214	0	0
Proteobacteria	Chromatiaceae	Thiocystis	Thiocystis_violacea	0.00230851	0.00209214	0.00390549	0.00642495
Firmicutes	Clostridiaceae	Clostridium	Clostridium_bifermentans	0	0	0	0.0042833
Firmicutes	Clostridiaceae	Clostridium	Clostridium_butyricum	0	0.00209214	0	0.0449746
Firmicutes	Clostridiaceae	Clostridium	Clostridium_glycolicum	0	0.0502113	0	0
Firmicutes	Clostridiaceae	Clostridium	Clostridium_sartagoforme	0	0	0	0.00642495
Proteobacteria	Comamonadaceae	Acidovorax	Acidovorax_citrulli	0.00230851	0	0	0
Proteobacteria	Comamonadaceae	Acidovorax	Acidovorax_sp._R-27044	0	0.00209214	0	0
Proteobacteria	Comamonadaceae	Comamonas	Comamonas_aquatica	0	0.00209214	0.00195274	0.0235581
Proteobacteria	Comamonadaceae	Comamonas	Comamonas_denitrificans	0.00230851	0	0	0
Proteobacteria	Comamonadaceae	Comamonas	Comamonas_sp.	0	0	0	0.0042833
Proteobacteria	Comamonadaceae	Comamonas	Comamonas_sp._R-24451	0	0	0.00195274	0
Proteobacteria	Comamonadaceae	Comamonas	Comamonas_testosteroni	0	0	0	0.0042833
Proteobacteria	Comamonadaceae	Diaphorobacter	Diaphorobacter_nitroreducens	0	0	0.00390549	0.00214165
Actinobacteria	Corynebacteriaceae	Corynebacterium	Corynebacterium_confusum	0	0.00209214	0.00390549	0
Actinobacteria	Corynebacteriaceae	Corynebacterium	Corynebacterium_falsenii	0.00230851	0	0.00781097	0
Actinobacteria	Corynebacteriaceae	Corynebacterium	Corynebacterium_macginleyi	0	0	0.00585823	0.00214165
Actinobacteria	Corynebacteriaceae	Corynebacterium	Corynebacterium_riegelii	0	0.00209214	0	0
Actinobacteria	Corynebacteriaceae	Corynebacterium	Corynebacterium_sp.	0	0	0	0.00856659
Actinobacteria	Corynebacteriaceae	Corynebacterium	Corynebacterium_sp._3301750	0.00230851	0	0	0
Actinobacteria	Corynebacteriaceae	Corynebacterium	Corynebacterium_tuberculostearicum	0	0	0	0.00856659
Actinobacteria	Corynebacteriaceae	Corynebacterium	Corynebacterium_ureicelerivorans	0	0.00209214	0	0
Bacteroidetes	Cytophagaceae	Sporocytophaga	Sporocytophaga_cauliformis	0	0	0	0.00214165
Actinobacteria	Dermabacteraceae	Brachybacterium	Brachybacterium_faecium	0	0	0	0.00214165
Actinobacteria	Dermacoccaceae	Dermacoccus	Dermacoccus_sp._Ellin185	0	0	0	0.00214165
Proteobacteria	Desulfovibrionaceae	Desulfovibrio	Desulfovibrio_intestinalis	0	0	0.00390549	0.0471163
Actinobacteria	Dietziaceae	Dietzia	Dietzia_natronolimnaea	0.00230851	0	0.00976372	0
Proteobacteria	Enterobacteriaceae	Enterobacter	Enterobacter_sp._XW122	0.00692553	0	0.0624878	0
Proteobacteria	Enterobacteriaceae	Erwinia	Erwinia_persicina	0	0	0	0.00214165
Proteobacteria	Enterobacteriaceae	Escherichia	Escherichia_coli	0	0.0230135	0.00195274	0.00214165
Proteobacteria	Enterobacteriaceae	Hafnia	Hafnia_alvei	0.00461702	0.0125528	0.00390549	0.137066
Proteobacteria	Enterobacteriaceae	Morganella	Morganella_morganii	0.0115425	0	0.00195274	0.719594
Proteobacteria	Enterobacteriaceae	Obesumbacterium	Obesumbacterium_proteus	0.00230851	0.00209214	0.00195274	0
Proteobacteria	Enterobacteriaceae	Pantoea	Pantoea_agglomerans	0.00230851	0.00627641	0.00390549	0
Proteobacteria	Enterobacteriaceae	Pantoea	Pantoea_ananatis	0	0.00418428	0.0136692	0.0214165
Proteobacteria	Enterobacteriaceae	Pectobacterium	Pectobacterium_carotovorum	0	0	0	0.0042833
Proteobacteria	Enterobacteriaceae	Plesiomonas	Plesiomonas_shigelloides	0	0.0251057	0.00390549	0.0192748
Proteobacteria	Enterobacteriaceae	Proteus	Proteus_penneri	0	0.0125528	0	0
Proteobacteria	Enterobacteriaceae	Proteus	Proteus_sp._K107	0.00692553	0.0271978	0.0273384	0.00214165
Proteobacteria	Enterobacteriaceae	Proteus	Proteus_vulgaris	0.00923404	0.255241	0.236282	0.595378
Proteobacteria	Enterobacteriaceae	Providencia	Providencia_rettgeri	0	0	0	0.00856659
Proteobacteria	Enterobacteriaceae	Serratia	Serratia_odorifera	0	0	0	0.0128499
Proteobacteria	Enterobacteriaceae	Shigella	Shigella_flexneri	0	0	0	0.134924
Proteobacteria	Enterobacteriaceae	Shigella	Shigella_sonnei	0.00230851	0	0	0
Proteobacteria	Enterobacteriaceae	Yersinia	Yersinia_intermedia	0.00461702	0.00418428	0.187463	2.69205
Proteobacteria	Enterobacteriaceae	Yersinia	Yersinia_kristensenii	0.0438617	0.17574	0.113259	0
Proteobacteria	Enterobacteriaceae	Yersinia	Yersinia_rohdei	0.0692553	0	0	0
Firmicutes	Enterococcaceae	Enterococcus	Enterococcus_avium	0	0	0	0.00214165
Firmicutes	Enterococcaceae	Enterococcus	Enterococcus_casseliflavus	0.00230851	0	0	0
Firmicutes	Enterococcaceae	Enterococcus	Enterococcus_faecalis	0	0	0	0.00214165
Firmicutes	Enterococcaceae	Enterococcus	Enterococcus_faecium	0	0.00209214	0	0
Firmicutes	Enterococcaceae	Enterococcus	Enterococcus_gallinarum	0	0	0.00195274	0
Firmicutes	Enterococcaceae	Enterococcus	Enterococcus_gilvus	0.00461702	0.00418428	0.00585823	0.0171332
Firmicutes	Enterococcaceae	Enterococcus	Enterococcus_hermanniensis	0	0.00209214	0	0
Firmicutes	Enterococcaceae	Enterococcus	Enterococcus_malodoratus	0	0.0104607	0.0312439	0.0278414
Firmicutes	Enterococcaceae	Enterococcus	Enterococcus_raffinosus	0	0	0	0.0235581
Firmicutes	Enterococcaceae	Enterococcus	Enterococcus_sp._CSL_7544-3	0	0.00209214	0	0
Firmicutes	Enterococcaceae	Vagococcus	Vagococcus_fluvialis	0	0.00209214	0	0.00214165
Proteobacteria	Chromatiaceae	Lamprocystis	Lamprocystis_purpurea	0	0	0.00195274	0
Bacteroidetes	Flammeovirgaceae	Flexithrix	Flexithrix_dorotheae	0	0.00209214	0	0
Bacteroidetes	Flavobacteriaceae	Capnocytophaga	Capnocytophaga_canimorsus	0	0	0.00195274	0
Bacteroidetes	Flavobacteriaceae	Chryseobacterium	Chryseobacterium_balustinum	0.00230851	0.00836855	0.00195274	0
Bacteroidetes	Flavobacteriaceae	Chryseobacterium	Chryseobacterium_formosense	0	0	0	0.190607
Bacteroidetes	Flavobacteriaceae	Chryseobacterium	Chryseobacterium_gleum	0.00230851	0.00836855	0	0
Bacteroidetes	Flavobacteriaceae	Chryseobacterium	Chryseobacterium_indologenes	0.00923404	0.00627641	0.113259	0.259139
Bacteroidetes	Flavobacteriaceae	Dokdonia	Dokdonia_donghaensis	0.00230851	0	0.00781097	0.00642495
Bacteroidetes	Flavobacteriaceae	Elizabethkingia	Elizabethkingia_meningoseptica	0	0.00209214	0.00390549	0.0128499
Bacteroidetes	Flavobacteriaceae	Flavobacteriaceae	Flavobacteriaceae_bacterium_3519-10	0	0.00209214	0	0.00214165
Bacteroidetes	Flavobacteriaceae	Flavobacterium	Flavobacterium_columnare	0.0877233	0.00209214	0	0.22059
Bacteroidetes	Flavobacteriaceae	Flavobacterium	Flavobacterium_hibernum	0	0	0.00781097	0
Bacteroidetes	Flavobacteriaceae	Flavobacterium	Flavobacterium_hydatis	0.00230851	0.00209214	0	0
Bacteroidetes	Flavobacteriaceae	Flavobacterium	Flavobacterium_johnsoniae	0.0554042	0.00418428	0.0136692	0.0449746
Bacteroidetes	Flavobacteriaceae	Flavobacterium	Flavobacterium_sp.	0.0554042	0.00418428	0.0820152	0.0149915
Bacteroidetes	Flavobacteriaceae	Flavobacterium	Flavobacterium_sp._BH12.12	0	0.00209214	0	0
Bacteroidetes	Flavobacteriaceae	Flavobacterium	Flavobacterium_sp._MSY2	0	0.00418428	0.00390549	0.00214165
Bacteroidetes	Flavobacteriaceae	Flavobacterium	Flavobacterium_sp._SOC_A4(12)	0	0	0.00195274	0
Bacteroidetes	Flavobacteriaceae	Hymenobacter	Hymenobacter_chitinivorans	0	0.00209214	0	0
Bacteroidetes	Flavobacteriaceae	Hymenobacter	Hymenobacter_psychrotolerans	0	0	0	0.00214165
Bacteroidetes	Flavobacteriaceae	Leeuwenhoekiella	Leeuwenhoekiella_marinoflava	0	0.00209214	0	0.00214165
Bacteroidetes	Flavobacteriaceae	Myroides	Myroides_odoratimimus	0.00230851	0.00209214	0.0214802	0.0749577
Bacteroidetes	Flavobacteriaceae	Myroides	Myroides_odoratus	0	0.00209214	0.0136692	0.00856659
Bacteroidetes	Flavobacteriaceae	Myroides	Myroides_profundi	0	0	0	0.00214165
Bacteroidetes	Flavobacteriaceae	Polaribacter	Polaribacter_filamentus	0	0	0	0.00214165
Bacteroidetes	Flavobacteriaceae	Riemerella	Riemerella_anatipestifer	0	0	0.117165	0.289123
Bacteroidetes	Flavobacteriaceae	Tenacibaculum	Tenacibaculum_maritimum	0	0	0	0.00214165
Bacteroidetes	Flavobacteriaceae	Zunongwangia	Zunongwangia_profunda	0	0	0.00781097	0.0042833
Actinobacteria	Frankiaceae	Frankia	Frankia_sp.	0	0	0	0.0042833
Fusobacteria	Fusobacteriaceae	Fusobacterium	Fusobacterium_equinum	0.101574	0	0	0
Fusobacteria	Fusobacteriaceae	Fusobacterium	Fusobacterium_mortiferum	0.0277021	0	0.00976372	3.04757
Fusobacteria	Fusobacteriaceae	Fusobacterium	Fusobacterium_necrophorum	0.0923404	0.165279	0.195274	6.47206
Fusobacteria	Fusobacteriaceae	Fusobacterium	Fusobacterium_nucleatum	0.0230851	0.104607	0.00976372	0.23344
Fusobacteria	Fusobacteriaceae	Fusobacterium	Fusobacterium_perfoetens	0	0.104607	0	0.00214165
Fusobacteria	Fusobacteriaceae	Fusobacterium	Fusobacterium_varium	0	0	0.00976372	0.0321247
Fusobacteria	Fusobacteriaceae	Ilyobacter	Ilyobacter_tartaricus	0.0230851	0	0	0
Fusobacteria	Fusobacteriaceae	Leptotrichia	Leptotrichia_trevisanii	0	0.00209214	0	0
Fusobacteria	Fusobacteriaceae	Propionigenium	Propionigenium_modestum	0.124659	0	0	0.0706744
Actinobacteria	Gordoniaceae	Williamsia	Williamsia_muralis	0	0	0	0.00214165
Proteobacteria	Halomonadaceae	Halomonas	Halomonas_aquamarina	0	0	0.00195274	0
Proteobacteria	Halomonadaceae	Halomonas	Halomonas_campisalis	0	0	0.00195274	0
Proteobacteria	Halomonadaceae	Halomonas	Halomonas_cerina	0	0	0	0.0342664
Proteobacteria	Halomonadaceae	Halomonas	Halomonas_meridiana	0	0.00209214	0	0.00214165
Proteobacteria	Halomonadaceae	Halomonas	Halomonas_sp._GWS-SE-H246	0	0	0.00195274	0.0042833
Proteobacteria	Halomonadaceae	Halomonas	Halomonas_sp._NT_N60	0	0	0	0.00214165
Proteobacteria	Halomonadaceae	Halomonas	Halomonas_venusta	0	0	0.00195274	0
Proteobacteria	Hyphomicrobiaceae	Hyphomicrobium	Hyphomicrobium_facile	0	0.0795012	0	0
Proteobacteria	Hyphomicrobiaceae	Hyphomicrobium	Hyphomicrobium_sulfonivorans	0	0	0.0136692	0
Proteobacteria	Hyphomicrobiaceae	Hyphomicrobium	uncultured_Hyphomicrobium_sp.	0.117734	0.311729	0.228471	0.261281
Proteobacteria	Legionellaceae	Legionella	Legionella_anisa	0.00461702	0.0439349	0.0195274	0.102799
Proteobacteria	Legionellaceae	Legionella	Legionella_nautarum	0	0	0.00195274	0
Bacteroidetes	Marinilabiliaceae	Marinilabilia	Marinilabilia_salmonicolor	0	0	0	0.00214165
Proteobacteria	Methylobacteriaceae	Methylobacterium	Methylobacterium_aquaticum	0.120042	0.00418428	0.171841	0
Proteobacteria	Methylobacteriaceae	Methylobacterium	Methylobacterium_jeotgali	0	0.0271978	0	0.0042833
Proteobacteria	Methylobacteriaceae	Methylobacterium	Methylobacterium_persicinum	0	0	0.0195274	0
Proteobacteria	Methylobacteriaceae	Methylobacterium	Methylobacterium_platani	0	0	0.00195274	0
Proteobacteria	Methylobacteriaceae	Methylobacterium	Methylobacterium_radiotolerans	0.00230851	0.00627641	0.00195274	0.0042833
Proteobacteria	Methylobacteriaceae	Methylobacterium	Methylobacterium_rhodesianum	0.219308	0.263609	0.667838	0.319106
Proteobacteria	Methylobacteriaceae	Methylobacterium	Methylobacterium_salsuginis	0.00461702	0	0	0
Proteobacteria	Methylobacteriaceae	Methylobacterium	Methylobacterium_sp._Hojyo1	0	0.261517	0.402265	0.0107082
Proteobacteria	Methylobacteriaceae	Methylobacterium	uncultured_Methylobacterium_sp.	0	0.0125528	0.00195274	0.00214165
Proteobacteria	Methylococcaceae	Methylobacter	Methylobacter_vinelandii	0	0	0	0.00214165
Actinobacteria	Microbacteriaceae	Leifsonia	Leifsonia_aquatica	0	0.00418428	0	0
Actinobacteria	Microbacteriaceae	Leifsonia	Leifsonia_poae	0	0.00209214	0	0
Actinobacteria	Microbacteriaceae	Leifsonia	Leifsonia_shinshuensis	0	0.00418428	0	0
Proteobacteria	Micrococcaceae	Arthrobacter	Arthrobacter_protophormiae	0.00230851	0	0	0
Proteobacteria	Micrococcaceae	Micrococcus	Micrococcus_luteus	0	0.00627641	0.00585823	0.00856659
Proteobacteria	Micrococcaceae	Micrococcus	Micrococcus_sp._SMCC_ZAT352	0	0	0.00390549	0
Proteobacteria	Micrococcaceae	Nesterenkonia	Nesterenkonia_aethiopica	0	0.00209214	0.00195274	0.0042833
Proteobacteria	Micrococcaceae	Nesterenkonia	Nesterenkonia_xinjiangensis	0	0.00209214	0	0
Proteobacteria	Moraxellaceae	Acinetobacter	Acinetobacter_johnsonii	0	0.00209214	0	0
Proteobacteria	Moraxellaceae	Acinetobacter	Acinetobacter_xiamenensis	0	0	0.00195274	0
Actinobacteria	Mycobacteriaceae	Mycobacterium	Mycobacterium_fallax	0	0.00209214	0	0
Actinobacteria	Mycobacteriaceae	Mycobacterium	Mycobacterium_parascrofulaceum	0.00230851	0.00209214	0	0.00214165
Actinobacteria	Mycobacteriaceae	Mycobacterium	Mycobacterium_parmense	0.00230851	0.00209214	0	0.00214165
Actinobacteria	Mycobacteriaceae	Mycobacterium	Mycobacterium_sphagni	0	0.00418428	0	0
Actinobacteria	Mycobacteriaceae	Mycobacterium	Mycobacterium_sp._K328W	0	0.00418428	0	0.0042833
Proteobacteria	Nitrosomonadaceae	Unknown	uncultured_Nitrosomonadaceae_bacterium	0	0	0.00195274	0
Actinobacteria	Nocardiaceae	Nocardia	Nocardia_seriolae	0	0	0	0.00214165
Actinobacteria	Nocardiaceae	Rhodococcus	Rhodococcus_erythropolis	0	0	0.00195274	0
Other	Other	Other	Glechoma_hederacea	0	0	0	0.00214165
Other	Other	Other	Pinus_thunbergii	0	0.00209214	0	0
Proteobacteria	Oxalobacteraceae	Duganella	Duganella_zoogloeoides	0	0	0	0.00214165
Proteobacteria	Oxalobacteraceae	Janthinobacterium	Janthinobacterium_lividum	0	0	0	0.0599662
Proteobacteria	Oxalobacteraceae	Janthinobacterium	Janthinobacterium_sp._SY12	0.00461702	0.0795012	0.00976372	0.042833
Firmicutes	Paenibacillaceae	Paenibacillus	Paenibacillus_apiarius	0	0.00209214	0	0.00214165
Firmicutes	Paenibacillaceae	Paenibacillus	Paenibacillus_ehimensis	0	0	0.00390549	0
Firmicutes	Paenibacillaceae	Paenibacillus	Paenibacillus_macerans	0	0.00418428	0.00390549	0
Firmicutes	Paenibacillaceae	Paenibacillus	Paenibacillus_sp._Ao3	0	0	0	0.00214165
Firmicutes	Peptoniphilaceae	Peptoniphilus	Peptoniphilus_indolicus	0	0.00209214	0	0
Planctomycetes	Planctomycetaceae	Planctomyces	Planctomyces_limnophilus	0.00230851	0.00209214	0.00585823	0.00214165
Planctomycetes	Planctomycetaceae	Rhodopirellula	Rhodopirellula_baltica	0	0	0	0.00214165
Firmicutes	Planococcaceae	Planomicrobium	Planomicrobium_okeanokoites	0	0	0.00390549	0
Bacteroidetes	Porphyromonadaceae	Parabacteroides	Parabacteroides_goldsteinii	0	0	0	0.0042833
Bacteroidetes	Porphyromonadaceae	Porphyromonas	Porphyromonas_gingivalis	0.237776	0.0899619	0	0
Bacteroidetes	Porphyromonadaceae	Tannerella	Tannerella_forsythia	0.177755	0.907988	2.75532	5.24276
Proteobacteria	Propionibacteriaceae	Propionibacterium	Propionibacterium_acnes	0.0138511	0.0815934	0.0820152	0.0556829
Proteobacteria	Pseudomonadaceae	Pseudomonas	Pseudomonas_aeruginosa	0	0	0.318297	0
Proteobacteria	Pseudomonadaceae	Pseudomonas	Pseudomonas_coronafaciens	0.00692553	0	0	0.00214165
Proteobacteria	Pseudomonadaceae	Pseudomonas	Pseudomonas_extremaustralis	0	0.00209214	0.00390549	0.00214165
Proteobacteria	Pseudomonadaceae	Pseudomonas	Pseudomonas_putida	0	0.424704	0	0.154199
Proteobacteria	Pseudomonadaceae	Pseudomonas	Pseudomonas_sp._CO-1	0	0	0	0.00214165
Proteobacteria	Pseudomonadaceae	Pseudomonas	Pseudomonas_sp._OPS1	0	0	0	0.14349
Proteobacteria	Pseudomonadaceae	Pseudomonas	Pseudomonas_stutzeri	0	0	0	0.0813826
Proteobacteria	Pseudomonadaceae	Pseudomonas	Pseudomonas_syringae	0.00230851	0	0	0
Proteobacteria	Pseudomonadaceae	Pseudomonas	uncultured_Pseudomonas_sp.	0	0	0	0.00214165
Actinobacteria	Pseudonocardiaceae	Amycolatopsis	Amycolatopsis_lactamdurans	0	0	0	0.00214165
Actinobacteria	Pseudonocardiaceae	Pseudonocardia	Pseudonocardia_zijingensis	0	0	0	0.00214165
Proteobacteria	Ralstoniaceae	Ralstonia	Ralstonia_insidiosa	0	0	0	0.0149915
Proteobacteria	Ralstoniaceae	Ralstonia	Ralstonia_pickettii	0.0438617	1.50843	0.743995	0.368364
Proteobacteria	Ralstoniaceae	Ralstonia	uncultured_Ralstonia_sp.	0.0161596	0.0376585	0.0136692	0.0042833
Proteobacteria	Rhodobacteraceae	Rhodobacteraceae	Rhodobacteraceae_bacterium_GWS-BW-H55M	0	0	0	0.00214165
Proteobacteria	Rhodobacteraceae	Ruegeria	Ruegeria_atlantica	0	0	0.00195274	0
Proteobacteria	Rhodospirillaceae	Azospirillum	Azospirillum_brasilense	0	0	0	0.0171332
Proteobacteria	Rhodospirillaceae	Azospirillum	Azospirillum_sp._BV-s	0	0	0	0.00214165
Actinobacteria	Rubrobacteraceae	Rubrobacter	Rubrobacter_xylanophilus	0	0	0.00390549	0
Proteobacteria	Shewanellaceae	Shewanella	Shewanella_algae	0	0.00209214	0.0371021	0.00642495
Proteobacteria	Shewanellaceae	Shewanella	Shewanella_baltica	0	0	0	0.0385497
Proteobacteria	Shewanellaceae	Shewanella	Shewanella_decolorationis	0	0	0.00390549	0
Proteobacteria	Shewanellaceae	Shewanella	Shewanella_frigidimarina	0.00230851	0.00209214	0	0.0042833
Proteobacteria	Shewanellaceae	Shewanella	Shewanella_hafniensis	0	0	0	0.00214165
Proteobacteria	Shewanellaceae	Shewanella	Shewanella_haliotis	0.00230851	0.00418428	0.00585823	0.00642495
Proteobacteria	Shewanellaceae	Shewanella	Shewanella_oneidensis	0	0	0.00195274	0
Proteobacteria	Shewanellaceae	Shewanella	Shewanella_putrefaciens	0	0.0815934	0.0156219	0.0042833
Proteobacteria	Shewanellaceae	Shewanella	Shewanella_sp._184	0	0	0.00195274	0.00214165
Proteobacteria	Shewanellaceae	Shewanella	Shewanella_sp._ANA-3	0	0	0	0.0042833
Proteobacteria	Shewanellaceae	Shewanella	Shewanella_sp._MR-4	0.00461702	0.00209214	0	0.00214165
Proteobacteria	Shewanellaceae	Shewanella	Shewanella_sp._S2	0	0	0	0.0042833
Bacteroidetes	Sphingobacteriaceae	Pedobacter	Pedobacter_heparinus	0	0	0.00390549	0.0149915
Bacteroidetes	Sphingobacteriaceae	Pedobacter	Pedobacter_sp._4236	0	0	0	0.0149915
Bacteroidetes	Sphingobacteriaceae	Pedobacter	Pedobacter_sp._MJ11	0	0	0.00390549	0.00856659
Bacteroidetes	Sphingobacteriaceae	Sphingobacterium	Sphingobacterium_kitahiroshimense	0	0	0.00195274	0.00642495
Bacteroidetes	Sphingobacteriaceae	Sphingobacterium	Sphingobacterium_multivorum	0	0	0.0253857	0.00214165
Bacteroidetes	Sphingobacteriaceae	Sphingobacterium	Sphingobacterium_spiritivorum	0	0	0.00781097	0
Bacteroidetes	Sphingobacteriaceae	Sphingobacterium	Sphingobacterium_sp._PM2-P1-29	0	0	0	0.00856659
Bacteroidetes	Sphingomonadaceae	Porphyrobacter	Porphyrobacter_tepidarius	0	0	0	0.00214165
Firmicutes	Staphylococcaceae	Gemella	Gemella_haemolysans	0	0.0104607	0	0
Firmicutes	Staphylococcaceae	Gemella	Gemella_morbillorum	0	0	0.00195274	0
Firmicutes	Staphylococcaceae	Staphylococcus	Staphylococcus_aureus	0	0.00209214	0.00390549	0.00214165
Firmicutes	Staphylococcaceae	Staphylococcus	Staphylococcus_caprae	0	0	0	0.0042833
Firmicutes	Staphylococcaceae	Staphylococcus	Staphylococcus_epidermidis	0	0.00418428	0	0.0042833
Firmicutes	Staphylococcaceae	Staphylococcus	Staphylococcus_equorum	0	0	0	0.0042833
Firmicutes	Staphylococcaceae	Staphylococcus	Staphylococcus_hominis	0.00230851	0	0.00195274	0
Firmicutes	Staphylococcaceae	Staphylococcus	Staphylococcus_saprophyticus	0	0	0.00390549	0
Firmicutes	Streptococcaceae	Streptococcus	Streptococcus_suis	0	0	0.00585823	0
Actinobacteria	Streptomycetaceae	Streptomyces	Streptomyces_libani	0	0	0	0.00214165
Cyanobacteria	Synechococcaceae	Synechococcus	Synechococcus_sp._CC9902	0.00230851	0	0.00781097	0
Cyanobacteria	Synechococcaceae	Synechococcus	Synechococcus_sp._CCMP839	0	0	0.00195274	0
Cyanobacteria	Synechococcaceae	Synechococcus	Synechococcus_sp._WH_7803	0.00692553	0.00209214	0.00976372	0.00856659
Cyanobacteria	Synechococcaceae	Synechococcus	Synechococcus_sp._WH_8012	0.00230851	0	0.00781097	0
Cyanobacteria	Synechococcaceae	Synechococcus	Synechococcus_sp._WH_8102	0	0	0.00195274	0
Cyanobacteria	Synechococcaceae	Synechococcus	Synechococcus_sp._WH_8103	0	0	0.00195274	0
Deinococcus-Thermus	Thermaceae	Thermus	Thermus_sp._YBJ-1	0.00230851	0	0.00195274	0
Actinobacteria	Tsukamurellaceae	Tsukamurella	Tsukamurella_pulmonis	0.00230851	0	0	0
Unknown	Unknown	Unknown	bacterium_py129	0	0.00418428	0	0
Unknown	Unknown	Unknown	uncultured_alpha_proteobacterium	0	0	0.00195274	0.00214165
Unknown	Unknown	Unknown	uncultured_bacterium	5.59583	1.3578	5.54384	2.39222
Unknown	Unknown	Unknown	uncultured_beta_proteobacterium	0	0	0	0.00214165
Unknown	Unknown	Unknown	uncultured_gamma_proteobacterium	0.00230851	0.00627641	0.00976372	2.85268
Unknown	Unknown	Unknown	uncultured_marine_bacterium	0	0	0.0175747	0
Unknown	Unknown	Unknown	uncultured_marine_microorganism	0	0.00418428	0.00195274	0
Unknown	Unknown	Unknown	uncultured_organism	0	0	0.0136692	0
Unknown	Unknown	Unknown	uncultured_proteobacterium	0.00461702	0.00209214	0	0.0149915
Unknown	Unknown	Unknown	uncultured_soil_bacterium	0	0.0627641	0.232376	0.0171332
Unknown	Unknown	Unknown	unidentified	0.00461702	0.0167371	0.00390549	0.00214165
Unknown	Unknown	Unknown	unidentified_marine_eubacterium	0	0	0.00195274	0.0042833
Proteobacteria	Vibrionaceae	Aliivibrio	Aliivibrio_fischeri	1.09192	0.00209214	0.00781097	0.9359
Proteobacteria	Vibrionaceae	Aliivibrio	Aliivibrio_logei	0	0.00209214	0	0
Proteobacteria	Vibrionaceae	Aliivibrio	Aliivibrio_salmonicida	0	0	0.00195274	0
Proteobacteria	Vibrionaceae	Enterovibrio	Enterovibrio_nigricans	0	0	0	0.00214165
Proteobacteria	Vibrionaceae	Photobacterium	Photobacterium_damselae	59.1509	69.5971	81.3591	44.5613
Proteobacteria	Vibrionaceae	Photobacterium	Photobacterium_ganghwense	0.210074	0.0397506	0.00195274	0.184182
Proteobacteria	Vibrionaceae	Photobacterium	Photobacterium_indicum	0	0.0502113	0	0
Proteobacteria	Vibrionaceae	Photobacterium	Photobacterium_leiognathi	12.0966	0.42052	0.0859207	0.456171
Proteobacteria	Vibrionaceae	Photobacterium	Photobacterium_sp._FLKF1	0	0	0.00195274	0
Proteobacteria	Vibrionaceae	Photobacterium	Photobacterium_sp._OIM3	0.0138511	0.0230135	0.0468658	0.0920909
Proteobacteria	Vibrionaceae	Vibrio	Vibrio_alginolyticus	0	0.00209214	0.00390549	0
Proteobacteria	Vibrionaceae	Vibrio	Vibrio_campbellii	0.0184681	0.00209214	0	0
Proteobacteria	Vibrionaceae	Vibrio	Vibrio_cholerae	0.00461702	0.171555	0.0195274	1.30855
Proteobacteria	Vibrionaceae	Vibrio	Vibrio_gallicus	0.00230851	0	0	0
Proteobacteria	Vibrionaceae	Vibrio	Vibrio_harveyi	8.58073	2.38713	0.607303	0.104941
Proteobacteria	Vibrionaceae	Vibrio	Vibrio_hispanicus	0.110808	0	0	0
Proteobacteria	Vibrionaceae	Vibrio	Vibrio_ichthyoenteri	0	0	0	0.00214165
Proteobacteria	Vibrionaceae	Vibrio	Vibrio_mimicus	0.191606	2.97084	0.433509	0.173474
Proteobacteria	Vibrionaceae	Vibrio	Vibrio_natriegens	0	0	0.00195274	0.00214165
Proteobacteria	Vibrionaceae	Vibrio	Vibrio_nereis	0.00461702	0	0	0
Proteobacteria	Vibrionaceae	Vibrio	Vibrio_ordalii	0	0.00209214	0.00195274	0
Proteobacteria	Vibrionaceae	Vibrio	Vibrio_parahaemolyticus	0.00230851	0.00209214	0.0156219	0.00214165
Proteobacteria	Vibrionaceae	Vibrio	Vibrio_ponticus	7.42878	13.5947	0.58387	3.59797
Proteobacteria	Vibrionaceae	Vibrio	Vibrio_sp._0908	0	0.00418428	0	0
Proteobacteria	Vibrionaceae	Vibrio	Vibrio_sp._12E01	0	0.00627641	0	0
Proteobacteria	Vibrionaceae	Vibrio	Vibrio_sp.	1.12655	0.123436	0.173794	0.342664
Proteobacteria	Vibrionaceae	Vibrio	Vibrio_sp._QY102	0	0	0	0.0214165
Proteobacteria	Vibrionaceae	Vibrio	Vibrio_vulnificus	2.38007	0.060672	0.00781097	1.31069
Proteobacteria	Xanthomonadaceae	Pseudoxanthomonas	Pseudoxanthomonas_sp._BD-a59	0	0	0.00195274	0
Proteobacteria	Xanthomonadaceae	Rhodanobacter	Rhodanobacter_ginsenosidimutans	0	0	0.00390549	0.00642495
Proteobacteria	Xanthomonadaceae	Stenotrophomonas	Stenotrophomonas_maltophilia	0.00230851	0.00627641	0	0.0449746
Proteobacteria	Xanthomonadaceae	Stenotrophomonas	Stenotrophomonas_nitritireducens	0	0	0.0214802	0
Proteobacteria	Xanthomonadaceae	Xanthomonas	Xanthomonas_campestris	0	0	0	0.00214165
